# Supplementary material for: Bat-specific adaptations in interferon signaling and GBP1 contribute to enhanced viral tolerance
Source: Research Square preprint supplement (doi:10.21203/rs.3.rs-5411236/v1), 2024-11-26
Supplement: Supplementary file 1 [file 00dd052868e41cdb4642015b.xlsx]

## Sheet: Table S1
Gene	Sequence (5’ to 3’)	Annealing Temperature
Pa_IRF7_F	CGACCCGCATAAAGTGTATGAG	56°C
Pa_IRF7_R	CCTGGTTAATGCCTGGACTTTC
Ef_IRF7_F	CCCGCACTGCACCATCTACCT	56°C
Ef_IRF7_R	CAGGTCCTCGTACAGGCTGTTG
Hu_IRF7_F	CCCACGCTATACCATCTACCT	57°C
Hu_IRF7_R	GATGTCGTCATAGAGGCTGTTG
Pa_MX1_F	Previously described by Zhou et al., 2016
Pa_MX1_R
Ef_MX1_F	GGACATGGAGATCAATCTT	52°C
Ef_MX1_R	TGATGCCAGGAAGGTCTA
Hu_MX1_F	AGGACTACGAGATTGAGAT	51°C
Hu_MX1_R	TTATGCCAGGAAGGTCTA
Pa_RSAD2_F	CAACTTTTCGGGCGGAGAAC	53°C
Pa_RSAD2_R	GGATGTCCAAATATGCGCCG
Ef_RSAD2_F	Previously described by Banerjee et al., 2017
Ef_RSAD2_R
Hu_RSAD2_F	Previously described by Banerjee et al., 2017
Hu_RSAD2_R
Pa_IFIT1_F	AAGAAGCTTGCCAGTCCCTC	54°C
Pa_IFIT1_R	TTCAGGGTTTTCAGGGTCCG
Ef_IFIT1_F	CAAACTGGCAGCCTAGAGGA	54°C
Ef_IFIT1_R	ATTGTTGCCTGCCTGTACG
Hu_IFIT1_F	GGCAGAAGCCCAGACTTACC	54°C
Hu_IFIT1_R	GGGTCCACTTCAAGCACCTT
Pa_GAPDH_F	ATACTTCTCATGGTTCACAC	56°C
Pa_GAPDH_R	TCATTGACCTCAACTACATG
Ef_GAPDH_F	GGAGCGAGATCCCGCCAACAT	56°C
Ef_GAPDH_R	GGGAGTTGTCATACTTGTCATGG
Hu_GAPDH_F	GGAGCGAGATCCCTCCAAAAT	57°C
Hu_GAPDH_R	GGCTGTTGTCATACTTCTCATGG

## Sheet: Table S2
Protein	Primary Antibody	Dilution	Supplier (Cat. no.)	Method
V5	Mouse	1/1000	Abcam	A
			(#ab27671)
STAT1	Mouse	1/1000	Bio-Rad	A
			(#P02-5B7)
pY701-STAT1	Rabbit	1/1000	Cell Signaling Technology	A/B
		1/200	(#9167S)
STAT2	Rabbit	1/1000	Cell Signaling Technology	A/B
		1/200	(#72604S)
pY690-STAT2	Rabbit	1/1000	Cell Signaling Technology	A/B
		1/200	(#88410S)
VSV-M	Mouse	1/1000	Kerafast	A
			(#EB0011)
MERS-CoV N	Rabbit	1/1000	Sino Biological	A
			(#40068-RP01-200)
SARS-CoV-2 N	Mouse	1/1000	Thermo Scientific	A
			(#MA1-7403)
Influenza A NP	Rabbit	1/1000	Invitrogen	A
			(#PA5-32242)
GAPDH	Mouse	1/1000	EMD Millipore	A
			(#MAB374)
ACTB	Rabbit	1/5000	Abcam (#ab8227)	A
DAPI	n/a	1/10,000	Thermo Scientific	B
			(#62248)
Secondary Antibody	Conjugate	Dilution	Supplier (Cat. no)	Method
Goat anti-mouse	IRDye 680	1/10,000	Licor Biosciences	A
	IRDye 800		(#926-68070)
			(#926-32210)
Donkey anti-rabbit	IRDye 680	1/10,000	Licor Biosciences	A
	IRDye 800		(#926-68073)
			(#926-32213)
Goat-anti mouse	Alexa Fluor 488	1/500	Thermo Scientific	B
			(#A32728)
Goat-anti rabbit	Alexa Fluor 594	1/500	Thermo Scientific	B
			(#A32740)

## Sheet: Table S3
Mutation	Forward primer (5’- 3’)	Reverse primer (5’- 3’)
EfGBP1- ΔD18TQ	CGGTGTGCCTCATTGAGAACACTCTAGCAGTTAACCCAGAAGCTTTGAAGATCC	GGATCTTCAAAGCTTCTGGGTTAACTGCTAGAGTGTTCTCAATGAGGCACACCG
PaGBP1- ΔE18NE	CCAGTGTGCCTCATTGAGAACACTCTGACAGTTAATCCGAAAGCTCTGGAGATTCTG	CAGAATCTCCAGAGCTTTCGGATTAACTGTCAGAGTGTTCTCAATGAGGCACACTGG
EfGBP1- ΔA18AA	CGGTGTGCCTCATTGAGAACACTGCAGCCGCGCTAGCAGTTAACCCAGAAGCTTTG	CAAAGCTTCTGGGTTAACTGCTAGCGCGGCTGCAGTGTTCTCAATGAGGCACACCG
PaGBP1- ΔA18AA	CCAGTGTGCCTCATTGAGAACACTGCAGCCGCGCTGACAGTTAATCCGAAAGCTCTGG	CCAGAGCTTTCGGATTAACTGTCAGCGCGGCTGCAGTGTTCTCAATGAGGCACACTGG

## Sheet: Table S4
Cell Line(s)	Total Processes	Elements
A549	90	GO:0001816~cytokine production
		GO:0010484~H3 histone acetyltransferase activity
		GO:0003431~growth plate cartilage chondrocyte development
		GO:0070269~pyroptosis
		GO:0072559~NLRP3 inflammasome complex
		GO:0019221~cytokine-mediated signaling pathway
		GO:0031265~CD95 death-inducing signaling complex
		GO:0021816~extension of a leading process involved in cell motility in cerebral cortex radial glia guided migration
		GO:0045332~phospholipid translocation
		GO:0032755~positive regulation of interleukin-6 production
		GO:0043066~negative regulation of apoptotic process
		GO:0097191~extrinsic apoptotic signaling pathway
		GO:0035781~CD86 biosynthetic process
		GO:2001187~positive regulation of CD8-positive, alpha-beta T cell activation
		GO:0043280~positive regulation of cysteine-type endopeptidase activity involved in apoptotic process
		GO:0050700~CARD domain binding
		GO:0043992~histone acetyltransferase activity (H3-K9 specific)
		GO:0005886~plasma membrane
		GO:0006954~inflammatory response
		GO:0032731~positive regulation of interleukin-1 beta production
		GO:0097200~cysteine-type endopeptidase activity involved in execution phase of apoptosis
		GO:1901223~negative regulation of NIK/NF-kappaB signaling
		GO:0043394~proteoglycan binding
		GO:0019901~protein kinase binding
		GO:0090536~NoRC complex
		GO:0071222~cellular response to lipopolysaccharide
		GO:0034612~response to tumor necrosis factor
		GO:0005102~receptor binding
		GO:0001525~angiogenesis
		GO:0034276~kynurenic acid biosynthetic process
		GO:1904437~positive regulation of transferrin receptor binding
		GO:0097340~inhibition of cysteine-type endopeptidase activity
		GO:0036464~cytoplasmic ribonucleoprotein granule
		GO:2001235~positive regulation of apoptotic signaling pathway
		GO:0044301~climbing fiber
		GO:0099039~sphingolipid translocation
		GO:0021814~cell motility involved in cerebral cortex radial glia guided migration
		GO:0043231~intracellular membrane-bounded organelle
		GO:0045335~phagocytic vesicle
		GO:0051726~regulation of cell cycle
		GO:0052739~phosphatidylserine 1-acylhydrolase activity
		GO:1990531~Lem3p-Dnf1p complex
		GO:0002397~MHC class I protein complex assembly
		GO:0006958~complement activation, classical pathway
		GO:0097194~execution phase of apoptosis
		GO:0043392~negative regulation of DNA binding
		GO:0006956~complement activation
		GO:0050727~regulation of inflammatory response
		GO:0045944~positive regulation of transcription from RNA polymerase II promoter
		GO:0097102~endothelial tip cell fate specification
		GO:1905206~positive regulation of hydrogen peroxide-induced cell death
		GO:0005764~lysosome
		GO:0030881~beta-2-microglobulin binding
		GO:0090090~negative regulation of canonical Wnt signaling pathway
		GO:0097527~necroptotic signaling pathway
		GO:0050729~positive regulation of inflammatory response
		GO:0052548~regulation of endopeptidase activity
		GO:0002224~toll-like receptor signaling pathway
		GO:0005615~extracellular space
		GO:0001817~regulation of cytokine production
		GO:1904685~positive regulation of metalloendopeptidase activity
		GO:0097199~cysteine-type endopeptidase activity involved in apoptotic signaling pathway
		GO:0005741~mitochondrial outer membrane
		GO:0002158~osteoclast proliferation
		GO:0033130~acetylcholine receptor binding
		GO:0008656~cysteine-type endopeptidase activator activity involved in apoptotic process
		GO:0012505~endomembrane system
		GO:0006919~activation of cysteine-type endopeptidase activity involved in apoptotic process
		GO:0032922~circadian regulation of gene expression
		GO:0031346~positive regulation of cell projection organization
		GO:0032496~response to lipopolysaccharide
		GO:0072562~blood microparticle
		GO:0043966~histone H3 acetylation
		GO:1903608~protein localization to cytoplasmic stress granule
		GO:0006957~complement activation, alternative pathway
		GO:0048661~positive regulation of smooth muscle cell proliferation
		GO:0031264~death-inducing signaling complex
		GO:0016590~ACF complex
		GO:0032655~regulation of interleukin-12 production
		GO:1904434~positive regulation of ferrous iron binding
		GO:0046007~negative regulation of activated T cell proliferation
		GO:0032735~positive regulation of interleukin-12 production
		GO:0090263~positive regulation of canonical Wnt signaling pathway
		GO:0008303~caspase complex
		GO:0005789~endoplasmic reticulum membrane
		GO:0071310~cellular response to organic substance
		GO:0004197~cysteine-type endopeptidase activity
		GO:0097342~ripoptosome
		GO:0006974~cellular response to DNA damage stimulus
		GO:0006569~tryptophan catabolic process

## Sheet: Table S5 (A549)
GO Terms	Count	H. sapiens genes	List Total	Pop Hits	Pop Total	Fold Enrichment	Adjpval
Biological process
GO:0051607~defense response to virus	67	DTX3L,IFIH1,EIF2AK2,MOV10,IFI27,MX2,MX1,RTP4,MLKL,UNC93B1,NLRC5,IFIT5,TRIM56,IFIT3,IFIT2,IFIT1,RSAD2,OAS1,STAT2,DHX58,ZBP1,ADAR,TREX1,NT5C3A,IFI16,IFI44L,AZI2,OAS3,OAS2,ISG15,ZC3HAV1,SLFN11,MYD88,DDX60L,RNASEL,IFITM3,IFITM2,IFITM1,PARP9,GBP3,GBP1,SHFL,OASL,TRIM22,PLSCR1,HERC5,DDX60,IRF7,SLFN13,PMAIP1,IRF2,IRF1,STAT1,SAMHD1,CARD8,CASP1,IFI6,TRIM5,IRF9,APOBEC3F,APOBEC3B,TLR3,STING1,BST2,ISG20,TRIM3…	667	207	16630	8.06995	6.60499e-39
GO:0045087~innate immune response	82	DTX3L,LGR4,IFIH1,EIF2AK2,TRIM14,HLA-C,HLA-B,IFI27,OTUD4,MX2,HLA-E,MX1,B2M,SERPING1,TRIM38,SLC15A3,UNC93B1,NLRC5,IFIT5,TRIM56,IFIT3,IFIT2,AXL,SAMD9,C1R,DHX58,ZBP1,ADAR,GSDMD,IFI16,RSAD2,OAS1,OAS3,OAS2,NOD1,ZC3HAV1,SHFL,PML,C2,MYD88,N4BP1,HLA-A,APOL1,ALPK1,CYBC1,DDX3X,PARP9,TMEM106A,TRIM25,TRIM26,IFI35,DAB2IP,OASL,TRIM22,TRIM21,ISG20,OPTN,HERC5,DDX60,IRF7,TRIM34,CASP4,ILRUN,SAMHD1,C1RL,IFI6,PARP14,…	667	465	16630	4.3967	2.83469e-27
GO:0045071~negative regulation of viral genome replication	27	IFIH1,APOBEC3F,MX1,IFIT5,RSAD2,IFIT1,IFI16,OAS1,OAS3,OAS2,ISG15,ZC3HAV1,N4BP1,RNASEL,IFITM3,IFITM2,IFITM1,SHFL,OASL,PLSCR1,ZNFX1,EIF2AK2,PARP10,BST2,ISG20,TRIM6,FAM111A	667	43	16630	15.6553	2.68039e-24
GO:0009615~response to virus	30	IFIH1,MX2,MX1,IFIT3,IFIT2,IFIT1,DHX58,ADAR,RSAD2,OAS1,OAS3,OAS2,ISG15,ZC3HAV1,XPR1,IFITM3,IFITM2,IFITM1,DDX3X,OASL,TRIM22,DDX60,IRF7,GTF2F1,EIF2AK2,MST1R,BST2,ISG20,IFI44,NMI	667	106	16630	7.05638	1.02182e-14
GO:0060337~type I interferon signaling pathway	16	IFITM3,AZI2,IFITM1,IRF7,STAT2,STAT1,IFITM2,IFI27,TREX1,IRF1,IRF2,OAS1,OAS2,MYD88,IRF9,SP100	667	37	16630	10.7816	1.75987e-10
GO:0043123~positive regulation of I-kappaB kinase/NF-kappaB signaling	31	TNFSF10,TRIM14,BIRC3,TRIM34,RIPK1,TRIM38,IFIT5,RNF31,CLEC7A,NOD1,ZC3HAV1,MYD88,APOL3,IRAK4,ALPK1,TMEM106A,TRIM25,TRIM21,TRIM22,LGALS9,SHISA5,CASP10,CASP1,HMOX1,SECTM1,CASP8,TLR3,RBCK1,BST2,TRIM5,TRIM6	667	193	16630	4.00471	2.54936e-08
GO:0060333~interferon-gamma-mediated signaling pathway	12	IRF1,IRF7,STAT1,HLA-C,HLA-B,IRF9,HLA-F,HLA-E,JAK2,NMI,HLA-A,SP100	667	27	16630	11.0811	9.40545e-08
GO:0035456~response to interferon-beta	8	IFITM3,IFITM2,XAF1,STAT1,PLSCR1,SHFL,IFITM1,BST2	667	10	16630	19.946	1.28977e-07
GO:0035455~response to interferon-alpha	8	IFITM3,IFITM2,IFITM1,ADAR,EIF2AK2,MX2,LAMP3,BST2	667	10	16630	19.946	1.28977e-07
GO:0032728~positive regulation of interferon-beta production	14	IFIH1,DDX3X,DHX58,IRF1,OAS1,TLR3,OAS3,OAS2,ISG15,ZC3HAV1,STING1,IRF7,ZBTB20,TRIM56	667	41	16630	8.51355	1.36868e-07
GO:0034341~response to interferon-gamma	11	IFITM3,IFITM2,IFITM1,STAT1,NUB1,CALCOCO2,SHFL,TRIM21,BST2,CXCL16,SP100	667	26	16630	10.5484	7.08308e-07
GO:0035458~cellular response to interferon-beta	10	IFITM2,IRF1,STAT1,PNPT1,TREX1,OAS1,TLR3,IFI16,STING1,TRIM6	667	22	16630	11.333	1.43982e-06
GO:0046596~regulation of viral entry into host cell	9	TRIM38,TRIM14,TRIM25,TRIM21,TRIM22,TRIM34,NECTIN2,TRIM5,TRIM6	667	18	16630	12.4663	2.85602e-06
GO:0060339~negative regulation of type I interferon-mediated signaling pathway	9	SAMHD1,STAT2,ADAR,TREX1,OAS1,OAS3,ISG15,NLRC5,USP18	667	19	16630	11.8101	4.90657e-06
GO:0019885~antigen processing and presentation of endogenous peptide antigen via MHC class I	7	TAP1,ERAP2,ERAP1,TAP2,HLA-A,TAPBP,B2M	667	10	16630	17.4528	4.92388e-06
GO:0000209~protein polyubiquitination	26	TRIM38,TRIM14,PSMB10,TRIM34,UBE2L6,ANKIB1,RNF31,PSMA3,RNF114,PSMA6,TOPORS,RBCK1,BARD1,AMBRA1,PSMB8,TRIM21,TRIM22,TRIP12,RNF19B,RUSC1,PSMB9,RNF144A,LNPEP,TRIM5,PSMB2,TRIM6	667	195	16630	3.32434	2.00157e-05
GO:0051092~positive regulation of NF-kappaB transcription factor activity	23	TRIM38,TRIM14,TRIM34,RIPK1,RNF31,STAT3,CLEC7A,PSMA6,NOD1,MYD88,TRIM25,TRIM21,TRIM22,LGALS9,FER,TNFRSF11A,PRKCQ,EIF2AK2,TLR3,RBCK1,TRIM5,PRKD2,TRIM6	667	159	16630	3.60659	2.37417e-05
GO:0060700~regulation of ribonuclease activity	5	OAS1,OAS3,OAS2,PDE3A,OASL	667	5	16630	24.9325	2.42652e-05
GO:0002480~antigen processing and presentation of exogenous peptide antigen via MHC class I, TAP-independent	6	HLA-C,HLA-B,HLA-A,HLA-F,HLA-E,LNPEP	667	8	16630	18.6994	2.42652e-05
GO:0006955~immune response	35	TNFSF10,HLA-C,HLA-B,HLA-A,HLA-F,HLA-E,IL15,B2M,PDCD1LG2,FYB1,IL1R1,TNFSF13B,FAS,IFI44L,JAK2,C3,PIK3R3,MBP,IFITM3,IFITM2,CTSL,GBP2,TRIM22,SERPINB9,GTPBP1,SAMHD1,CTSS,CXCL5,IFI6,CD274,CD164,SECTM1,TAPBP,C1R,IFI44	667	326	16630	2.67681	2.60222e-05
GO:0002376~immune system process	13	IRF2,IRF1,NUDCD1,IRF7,IRF9,RUBCN,SLFN11,B2M,IDO1,PSMB9,PRKCQ,MYD88,RNF213	667	54	16630	6.00228	3.12687e-05
GO:0050727~regulation of inflammatory response	17	CASP4,RICTOR,TREX1,CASP1,ZBP1,PIK3AP1,BIRC3,PSMA6,XIAP,DROSHA,JAK2,FOXP1,STING1,CYLD,USP18,MYD88,IL1R1	667	96	16630	4.41514	4.54083e-05
GO:0002250~adaptive immune response	23	TAP1,ERAP2,ERAP1,TAP2,BTN3A1,HLA-C,HLA-B,HLA-A,ADGRE1,HLA-E,UNC93B1,DCLRE1C,JAK2,CTNNBL1,IL4I1,CTSL,LAMP3,TNFRSF11A,PDCD1LG2,CTSS,RNF19B,CD274,PRKD2	667	172	16630	3.334	6.40788e-05
GO:0045088~regulation of innate immune response	8	ERAP1,SAMHD1,DHX58,BIRC3,IRF1,CASP8,XIAP,N4BP1	667	21	16630	9.49811	0.000122971
GO:0032731~positive regulation of interleukin-1 beta production	12	STAT3,CASP1,CLEC7A,GSDMD,IFI16,CASP8,LGALS9,CARD8,JAK2,TMEM106A,NOD1,MYD88	667	55	16630	5.43983	0.000198977
GO:0070106~interleukin-27-mediated signaling pathway	5	OAS1,OAS2,OASL,STAT1,MX1	667	7	16630	17.809	0.000264957
GO:0050852~T cell receptor signaling pathway	18	BTN3A2,BTN3A3,BTN3A1,PIK3CA,HLA-A,PSMB10,NFKBIZ,PSMA3,THEMIS2,PSMA6,PSMB9,RBCK1,PSMB8,BTN2A1,FYB1,PSMB2,PRKD2,RNF31	667	123	16630	3.64866	0.000264957
GO:0045321~leukocyte activation	6	HLA-C,HLA-B,HLA-A,HLA-F,HLA-E,EDN1	667	12	16630	12.4663	0.000363707
GO:0042771~intrinsic apoptotic signaling pathway in response to DNA damage by p53 class mediator	9	BRCA2,SHISA5,TMEM109,HIPK2,IFI16,USP28,PML,BBC3,TOPORS	667	32	16630	7.01228	0.000363707
GO:0051091~positive regulation of sequence-specific DNA binding transcription factor activity	17	TRIM38,STING1,CLEC7A,TRIM25,TRIM26,TRIM14,TRIM21,TRIM22,TRIM34,HIPK2,JAK2,TNFRSF11A,NKX3-1,EDN1,TRIM5,PRKD2,SP100	667	116	16630	3.65391	0.000419918
GO:0032760~positive regulation of tumor necrosis factor production	15	RIPK1,IFIH1,STAT3,CLEC7A,TMEM106A,LGALS9,HLA-E,OAS1,TLR3,OAS3,OAS2,JAK2,NOD1,ZBTB20,MYD88	667	95	16630	3.93672	0.00057665
GO:0002230~positive regulation of defense response to virus by host	9	DTX3L,PARP9,STAT1,APOBEC3F,STING1,PML,TRIM44,TRIM6,SIN3A	667	34	16630	6.59979	0.00057665
GO:0098586~cellular response to virus	12	IFIH1,DDX3X,EXT1,IFI6,ADAR,OAS1,TLR3,LGALS9,LGALS8,JAK2,FMR1,TRIM6	667	63	16630	4.74905	0.000660115
GO:0033209~tumor necrosis factor-mediated signaling pathway	13	STAT1,PSMB10,FAS,BIRC3,RIPK1,PSMA3,JAK2,TNFRSF11A,PSMB9,PSMB8,PSMA6,PSMB2,TNFSF13B	667	74	16630	4.38004	0.000676229
GO:0046597~negative regulation of viral entry into host cell	7	IFITM3,IFITM2,IFITM1,TRIM25,TRIM26,LY6E,TRIM5	667	20	16630	8.72639	0.000760469
GO:0006511~ubiquitin-dependent protein catabolic process	27	DTX3L,PSMF1,UBE2L6,USP28,ANKIB1,USP18,TOPORS,DISC1,PSMA3,RNF114,CUL4B,PSMA6,NUB1,TRIM25,RNF43,UBA6,USP11,HERC5,HERC6,TRIP12,USP33,RNF19B,RBBP6,UBE2Z,CYLD,RNF144A,RNF213	667	264	16630	2.54992	0.000775002
GO:0045944~positive regulation of transcription from RNA polymerase II promoter	78	NFATC3,HIPK2,ZNF224,EDN1,MED25,KAT2B,KAT2A,NFKBIZ,GPBP1,NFAT5,ELF1,NLRC5,ARID4B,SMARCA5,NCOA2,SERTAD1,RIPK1,STAT3,NCOA7,STAT1,KLF6,HNF4G,MLLT6,SIX1,ETS2,GLI3,IFI16,USF1,JAK2,VEZF1,SOX12,CREBRF,MSX1,IL4I1,MYD88,SETX,RNASEL,SIN3A,SOX21,DDX3X,STING1,IRF2,HOXB3,DAB2IP,STAT6,IRF2BPL,NAMPT,DLL1,EBF4,IRF9,HELZ2,NFATC2IP,IRF7,TCF4,ZNF107,STAT2,PRDM16,AGRN,IRF1,NFIX,GTF2F1,PCGF5,ETV6,RFX5,LMO2,PLSCR1,ID4,…	667	1187	16630	1.63836	0.000891288
GO:0002479~antigen processing and presentation of exogenous peptide antigen via MHC class I, TAP-dependent	7	TAP1,PSMB10,PSMA3,PSMA6,PSMB9,PSMB8,PSMB2	667	21	16630	8.31084	0.00100452
GO:1901224~positive regulation of NIK/NF-kappaB signaling	12	NFAT5,IFI35,DDX3X,EIF2AK2,TLR3,LGALS9,NOD1,TCIM,RBCK1,EDN1,TRIM44,NMI	667	67	16630	4.46553	0.00105684
GO:0019882~antigen processing and presentation	9	RAB8B,CTSL,EXT1,HLA-C,HLA-B,HLA-A,HLA-E,PSMB8,CTSS	667	38	16630	5.90507	0.00120428
GO:0070498~interleukin-1-mediated signaling pathway	9	PSMB10,PSMA3,PSMA6,IRAK4,PSMB9,PSMB8,MYD88,PSMB2,IL1R1	667	39	16630	5.75366	0.00146
GO:0034340~response to type I interferon	5	TRIM56,SHFL,SP100,ISG15,MX1	667	10	16630	12.4663	0.00165569
GO:0002474~antigen processing and presentation of peptide antigen via MHC class I	5	ERAP2,B2M,ERAP1,HLA-E,HLA-F	667	10	16630	12.4663	0.00165569
GO:0002486~antigen processing and presentation of endogenous peptide antigen via MHC class I via ER pathway, TAP-independent	6	HLA-C,HLA-B,HLA-A,HLA-F,HLA-E,HFE	667	16	16630	9.3497	0.00172736
GO:0006952~defense response	12	TAP1,MST1R,CXCL5,STAT2,STAT1,STAT6,HLA-B,SP140,MX2,MX1,NOD1,STAT3	667	73	16630	4.0985	0.0021868
GO:0006974~cellular response to DNA damage stimulus	26	DTX3L,FOXP1,PMAIP1,RAD9A,XIAP,USP28,FMR1,BBC3,TOPORS,MASTL,SETX,RIF1,BARD1,PARP4,SLFN11,UBA6,UBA7,IRF7,TRIP12,NFAT5,SAMHD1,TLK2,RBBP6,BOD1L1,CUL4B,FAM111A	667	268	16630	2.41883	0.0021868
GO:0050729~positive regulation of inflammatory response	14	MDK,CASP4,CASP1,ZBP1,CD47,IFI35,RIPK1,IL15,NFKBIZ,TLR3,JAK2,ITGA2,ABCC1,NMI	667	97	16630	3.59851	0.00220256
GO:0002476~antigen processing and presentation of endogenous peptide antigen via MHC class Ib	6	HLA-C,HLA-B,HLA-A,HLA-F,HLA-E,HFE	667	17	16630	8.79972	0.00232492
GO:0060546~negative regulation of necroptotic process	6	ADPRS,BIRC3,CASP8,RIPK1,RBCK1,RNF31	667	17	16630	8.79972	0.00232492
GO:0042270~protection from natural killer cell mediated cytotoxicity	4	SERPINB9,HLA-B,HLA-A,HLA-E	667	6	16630	16.6217	0.00236569
GO:0032020~ISG15-protein conjugation	4	UBE2L6,ISG15,HERC5,UBA7	667	6	16630	16.6217	0.00236569
GO:0001916~positive regulation of T cell mediated cytotoxicity	8	TAP2,HLA-C,HLA-B,HLA-A,HLA-F,HLA-E,B2M,HFE	667	35	16630	5.69886	0.00363835
GO:0010498~proteasomal protein catabolic process	8	PMAIP1,PSMB10,PSMA3,CUL4B,PSMA6,PSMB9,PSMB8,PSMB2	667	35	16630	5.69886	0.00363835
GO:0034612~response to tumor necrosis factor	8	MAP4K3,NUB1,CASP8,RIPK1,JAK2,TNFRSF11A,MBP,CXCL16	667	35	16630	5.69886	0.00363835
GO:0036388~pre-replicative complex assembly	6	PSMB10,PSMA3,PSMA6,PSMB9,PSMB8,PSMB2	667	19	16630	7.87343	0.00415591
GO:0043457~regulation of cellular respiration	4	PRDM16,PIK3CA,PNPT1,TREX1	667	7	16630	14.2472	0.00464446
GO:0032755~positive regulation of interleukin-6 production	13	IFIH1,STAT3,CLEC7A,MBP,TMEM106A,TLR3,LGALS9,NOD1,EREG,UNC93B1,ZBTB20,MYD88,IL17RC	667	94	16630	3.44812	0.00520757
GO:0006521~regulation of cellular amino acid metabolic process	6	PSMB10,PSMA3,PSMA6,PSMB9,PSMB8,PSMB2	667	20	16630	7.47976	0.00529909
GO:0060340~positive regulation of type I interferon-mediated signaling pathway	6	IRF7,ZBP1,STING1,NLRC5,TRIM56,TRIM6	667	20	16630	7.47976	0.00529909
GO:0045824~negative regulation of innate immune response	6	TRAFD1,DHX58,TREX1,TRIM21,IFI16,NMI	667	21	16630	7.12358	0.00708788
GO:0032880~regulation of protein localization	12	TRIM38,TRIM14,TRIM25,TRIM21,TRIM22,SIX1,MAP2,MYCBP2,NKX3-1,TRIM34,TRIM5,TRIM6	667	85	16630	3.51989	0.00743217
GO:1902036~regulation of hematopoietic stem cell differentiation	7	PSMB10,EIF2AK2,PSMA3,PSMA6,PSMB9,PSMB8,PSMB2	667	30	16630	5.81759	0.00764767
GO:0097527~necroptotic signaling pathway	4	RIPK1,FAS,MLKL,TLR3	667	8	16630	12.4663	0.00812341
GO:0090090~negative regulation of canonical Wnt signaling pathway	17	NKD1,MDK,SFRP1,PSMA3,AMER1,OTUD5,PSMB10,DAB2IP,DKK3,TLE4,GLI3,CYLD,PSMB9,PSMB8,PSMA6,LIMD1,PSMB2	667	156	16630	2.71701	0.00885978
GO:0038095~Fc-epsilon receptor signaling pathway	8	PSMB10,PSMA3,FER,PSMB9,PSMB8,PRKCQ,PSMA6,PSMB2	667	41	16630	4.86488	0.00936159
GO:0006954~inflammatory response	31	IDO1,CAMK1D,IL15,NFKBIZ,NFATC3,IL1R1,STAT3,CLEC7A,S1PR3,GSDMD,THEMIS2,IFI16,CARD8,NOD1,AXL,C3,MYD88,APOL3,C5,LIPA,PARP4,DAB2IP,LGALS9,PRKCQ,RIPK1,CASP4,CXCL5,CSF1,TCIRG1,TLR3,IL17RC	667	387	16630	1.99718	0.0100776
GO:0061418~regulation of transcription from RNA polymerase II promoter in response to hypoxia	6	PSMB10,PSMA3,PSMA6,PSMB9,PSMB8,PSMB2	667	23	16630	6.50414	0.0107426
GO:0031346~positive regulation of cell projection organization	3	RAB8B,ITGA2,KAT2A	667	4	16630	18.6994	0.0113669
GO:0032655~regulation of interleukin-12 production	3	HLA-B,CD47,FOXP1	667	4	16630	18.6994	0.0113669
GO:0039530~MDA-5 signaling pathway	3	OAS3,IRF7,IFIH1	667	4	16630	18.6994	0.0113669
GO:0098792~xenophagy	4	CALCOCO2,LGALS8,NOD1,RNF213	667	9	16630	11.0811	0.0121918
GO:0016579~protein deubiquitination	13	PSMB10,USP28,OTUD5,OTUD4,PSMA3,USP11,CYLD,PSMB9,PSMB8,PSMA6,USP18,USP33,PSMB2	667	105	16630	3.08689	0.0126127
GO:0016567~protein ubiquitination	36	DTX3L,TRIM38,TRIM14,BIRC3,TRIM34,XIAP,FBXO6,JADE2,RNF114,UBE2Z,MYCBP2,PML,BARD1,NUB1,TRIM26,UBC,RNF43,TRIM21,IRF2BPL,UBA6,TRIM69,HERC5,TRIM22,HERC6,UBR2,TRIM44,SOCS1,UBA7,RBBP6,LMO7,CUL4B,DCAF5,RNF144A,TRIM5,RNF213,TRIM6	667	486	16630	1.84685	0.0131824
GO:0051726~regulation of cell cycle	23	PNPT1,MX2,KAT2B,KAT2A,HIPK2,XIAP,MAP2K6,JADE3,JADE2,CDK18,STAT3,CDK12,MASTL,CDK17,NBN,PML,PHACTR4,BARD1,BIRC3,DAB2IP,IRF1,YEATS2,CDKL5	667	259	16630	2.21409	0.0135033
GO:0045332~phospholipid translocation	6	ATP10A,ATP10D,ATP8B2,ATP11C,ABCA1,ABCC1	667	25	16630	5.98381	0.0153433
GO:0032727~positive regulation of interferon-alpha production	6	IFIH1,IRF7,STAT1,TLR3,ZC3HAV1,DDX3X	667	25	16630	5.98381	0.0153433
GO:0070269~pyroptosis	6	CASP4,CASP1,ZBP1,GSDMD,CASP8,CARD8	667	25	16630	5.98381	0.0153433
GO:0048661~positive regulation of smooth muscle cell proliferation	9	FOXP1,STAT1,PIK3CA,ITGA2,HMOX1,EREG,EDN1,MYD88,IRAK4	667	57	16630	3.93672	0.0160133
GO:0006958~complement activation, classical pathway	7	C1RL,C3,SERPING1,C2,C1S,C1R,C5	667	35	16630	4.98651	0.0160133
GO:0001817~regulation of cytokine production	10	BTN3A2,BTN3A3,BTN3A1,ZBTB33,CASP8,ELF1,SOCS1,BTN2A1,IGF2BP2,ZBTB20	667	69	16630	3.61341	0.0160133
GO:0044790~negative regulation by host of viral release from host cell	5	PML,TRIM25,TRIM26,TRIM5,TRIM21	667	17	16630	7.3331	0.016473
GO:0090263~positive regulation of canonical Wnt signaling pathway	14	LGR4,SFRP1,DDX3X,PPM1B,PSMB10,AMER1,PLEKHA4,PSMA3,XIAP,CSNK1G1,PSMA6,PSMB9,PSMB8,PSMB2	667	125	16630	2.79244	0.0184394
GO:0000077~DNA damage checkpoint	7	DTX3L,PARP9,RAD9A,NBN,FBXO6,USP28,BRIP1	667	36	16630	4.84799	0.0184394
GO:0032496~response to lipopolysaccharide	15	FOXP1,CNP,OTUD5,CSF1,CASP8,LGALS9,IDO1,JAK2,TNFRSF11A,C2,EDN1,FER,TJP1,NOCT,TRIM6	667	140	16630	2.67134	0.0188063
GO:0010972~negative regulation of G2/M transition of mitotic cell cycle	6	PSMB10,PSMA3,PSMA6,PSMB9,PSMB8,PSMB2	667	27	16630	5.54056	0.0212294
GO:0034097~response to cytokine	8	STAT1,CD274,CXCL16,OSMR,TNFRSF11A,PML,MCL1,SP100	667	48	16630	4.15542	0.0212294
GO:0002158~osteoclast proliferation	3	TCIRG1,NPR3,CSF1	667	5	16630	14.9595	0.0214416
GO:0097340~inhibition of cysteine-type endopeptidase activity	3	CAST,XIAP,CARD8	667	5	16630	14.9595	0.0214416
GO:0019221~cytokine-mediated signaling pathway	14	STAT6,TGM2,STAT3,STAT2,STAT1,NFKBIZ,SOCS1,OSMR,JAK2,EREG,FER,IL22RA1,IL17RC,IRAK4	667	128	16630	2.727	0.0217393
GO:0042742~defense response to bacterium	14	CASP7,SHC1,ZNFX1,GSDMD,OAS1,TLR3,OAS3,OAS2,ISG15,RBCK1,NOD1,MYD88,RNF213,RNF31	667	128	16630	2.727	0.0217393
GO:0035457~cellular response to interferon-alpha	4	OAS1,IFIT3,IFIT2,AXL	667	11	16630	9.06638	0.023097
GO:1900246~positive regulation of RIG-I signaling pathway	4	ZC3HAV1,OASL,DHX58,DDX60	667	11	16630	9.06638	0.023097
GO:0007259~JAK-STAT cascade	7	STAT6,STAT3,STAT2,STAT1,JAK2,SOCS1,NMI	667	38	16630	4.59284	0.0232484
GO:0010468~regulation of gene expression	21	TCIRG1,DROSHA,TRIM14,IGF2BP2,TRIM22,TRIM21,AFF1,TRIM34,NFKBIZ,TAPBP,TSKU,FOXP1,TRIM26,MAP2K6,CDH1,TRIM44,RICTOR,TRIM5,RNASEL,TRIM38,TRIM6	667	242	16630	2.16357	0.0252932
GO:0071346~cellular response to interferon-gamma	11	STAT1,CASP1,GBP3,GBP2,CD47,GBP4,TLR3,LGALS9,RAB43,EDN1,GBP1	667	88	16630	3.11657	0.0252932
GO:0009617~response to bacterium	11	ERAP1,DHX58,TENT5A,C15orf48,TMEM229B,HERC6,C3,NLRC5,USP18,IFI44,PLAAT3	667	88	16630	3.11657	0.0252932
GO:0002223~stimulatory C-type lectin receptor signaling pathway	7	PSMB10,CLEC7A,PSMA3,PSMA6,PSMB9,PSMB8,PSMB2	667	39	16630	4.47507	0.0260815
GO:0038061~NIK/NF-kappaB signaling	7	PSMB10,BIRC3,PSMA3,PSMA6,PSMB9,PSMB8,PSMB2	667	39	16630	4.47507	0.0260815
GO:0043066~negative regulation of apoptotic process	34	CD38,TGM2,CAMK1D,PLAUR,BIRC3,RIPK1,XIAP,MCL1,RICTOR,IFIT3,AXL,TOPORS,FAS,ADAR,PDE3A,GLI3,MSX1,TJP1,SETX,SIN3A,DDX3X,SHC1,BARD1,SERPINB9,SFRP1,TCIM,DNAJA1,UBE2O,IFI6,EIF2AK2,ID1,UBE2Z,BTC,RHBDD1	667	476	16630	1.7809	0.0272032
GO:0002218~activation of innate immune response	6	ZBP1,ZNFX1,IFI16,STING1,TRIM5,SIN3A	667	29	16630	5.15846	0.0278167
GO:0043280~positive regulation of cysteine-type endopeptidase activity involved in apoptotic process	8	TNFSF10,DDX3X,CASP1,CLEC7A,CARD8,NOD1,NKX3-1,PMAIP1	667	51	16630	3.91099	0.0279862
GO:0010508~positive regulation of autophagy	10	OPTN,TRIM14,AMBRA1,SH3GLB1,TRIM22,TRIM21,TRIM38,TRIM34,TRIM5,TRIM6	667	77	16630	3.23799	0.0305775
GO:0097191~extrinsic apoptotic signaling pathway	8	SFRP1,FAS,IFI27,CASP8,RIPK1,TLR3,JAK2,PML	667	52	16630	3.83577	0.0309154
GO:0001525~angiogenesis	21	SAT1,ERAP1,NPR3,SHC1,CEMIP2,HMOX1,DAB2IP,FN1,CASP8,ID1,CEACAM1,VEZF1,PIK3CA,EREG,HOXB3,TYMP,WARS1,CALD1,NRP1,PRKD2,RNF213	667	247	16630	2.11977	0.0309154
GO:1901223~negative regulation of NIK/NF-kappaB signaling	6	RASSF2,DDX3X,PPM1B,IFI35,CYLD,NMI	667	30	16630	4.98651	0.0320622
GO:0006569~tryptophan catabolic process	3	KMO,IL4I1,IDO1	667	6	16630	12.4663	0.03467
GO:0015833~peptide transport	3	TAPBP,TAP1,TAP2	667	6	16630	12.4663	0.03467
GO:0043392~negative regulation of DNA binding	6	HMOX1,ID1,IFI16,JAK2,ILRUN,SP100	667	31	16630	4.82565	0.0370838
GO:0006919~activation of cysteine-type endopeptidase activity involved in apoptotic process	10	PMAIP1,BCL2L13,CASP8,CASP10,CARD8,JAK2,NKX3-1,PML,NOD1,BBC3	667	80	16630	3.11657	0.0382245
GO:0045655~regulation of monocyte differentiation	2	FOXP1,IRF7	667	2	16630	24.9325	0.0385147
GO:0071659~negative regulation of IP-10 production	2	OAS1,OAS3	667	2	16630	24.9325	0.0385147
GO:1904685~positive regulation of metalloendopeptidase activity	2	STAT3,MBP	667	2	16630	24.9325	0.0385147
GO:0043966~histone H3 acetylation	8	YEATS2,BRCA2,KAT2B,KAT2A,NFKBIZ,ATXN7,JADE3,JADE2	667	55	16630	3.62655	0.0385147
GO:0034276~kynurenic acid biosynthetic process	2	KMO,IDO1	667	2	16630	24.9325	0.0385147
GO:0021816~extension of a leading process involved in cell motility in cerebral cortex radial glia guided migration	2	SRGAP2C,SRGAP2	667	2	16630	24.9325	0.0385147
GO:0046967~cytosol to ER transport	2	TAP1,TAP2	667	2	16630	24.9325	0.0385147
GO:0002485~antigen processing and presentation of endogenous peptide antigen via MHC class I via ER pathway, TAP-dependent	2	HLA-A,TAP2	667	2	16630	24.9325	0.0385147
GO:2001235~positive regulation of apoptotic signaling pathway	6	CTSL,FAS,DAB2IP,JAK2,NKX3-1,CTSS	667	32	16630	4.67485	0.0385147
GO:0071222~cellular response to lipopolysaccharide	15	CXCL5,CASP1,KMO,CD274,CMPK2,DAB2IP,CD68,NFKBIZ,B2M,JAK2,CHMP5,ABCA1,PDCD1LG2,MYD88,AXL	667	156	16630	2.39736	0.0385147
GO:0032735~positive regulation of interleukin-12 production	7	MDK,IRF1,IDO1,CLEC7A,TLR3,LGALS9,UNC93B1	667	43	16630	4.05878	0.0385147
GO:0021814~cell motility involved in cerebral cortex radial glia guided migration	2	DAB2IP,BMERB1	667	2	16630	24.9325	0.0385147
GO:1905206~positive regulation of hydrogen peroxide-induced cell death	2	RIPK1,FOXP1	667	2	16630	24.9325	0.0385147
GO:2001187~positive regulation of CD8-positive, alpha-beta T cell activation	2	HLA-A,HLA-E	667	2	16630	24.9325	0.0385147
GO:0002397~MHC class I protein complex assembly	2	TAPBP,TAPBPL	667	2	16630	24.9325	0.0385147
GO:1904437~positive regulation of transferrin receptor binding	2	B2M,HFE	667	2	16630	24.9325	0.0385147
GO:0002477~antigen processing and presentation of exogenous peptide antigen via MHC class Ib	2	HLA-F,HLA-E	667	2	16630	24.9325	0.0385147
GO:0097102~endothelial tip cell fate specification	2	DLL1,NRP1	667	2	16630	24.9325	0.0385147
GO:0035781~CD86 biosynthetic process	2	TREX1,TMEM106A	667	2	16630	24.9325	0.0385147
GO:0032479~regulation of type I interferon production	4	TRIM56,TREX1,IRF7,TRIM21	667	13	16630	7.67155	0.0385147
GO:0002481~antigen processing and presentation of exogenous protein antigen via MHC class Ib, TAP-dependent	2	B2M,TAP2	667	2	16630	24.9325	0.0385147
GO:0006957~complement activation, alternative pathway	4	C3,CFB,CFH,C5	667	13	16630	7.67155	0.0385147
GO:0003431~growth plate cartilage chondrocyte development	2	COL27A1,TSKU	667	2	16630	24.9325	0.0385147
GO:1904434~positive regulation of ferrous iron binding	2	B2M,HFE	667	2	16630	24.9325	0.0385147
GO:0099039~sphingolipid translocation	2	ABCC1,ABCA1	667	2	16630	24.9325	0.0385147
GO:0052548~regulation of endopeptidase activity	4	PSMA3,XIAP,BIRC3,PSMB8	667	13	16630	7.67155	0.0385147
GO:0034124~regulation of MyD88-dependent toll-like receptor signaling pathway	2	IRF1,IRF7	667	2	16630	24.9325	0.0385147
GO:0097193~intrinsic apoptotic signaling pathway	6	CASP4,DDX3X,IFI6,HIPK2,NBN,PMAIP1	667	33	16630	4.53319	0.042104
GO:0006956~complement activation	5	C3,C2,CFB,CFH,C5	667	23	16630	5.42012	0.0421714
GO:0071639~positive regulation of monocyte chemotactic protein-1 production	4	OAS1,OAS3,LGALS9,CLEC7A	667	14	16630	7.12358	0.0421714
GO:0071310~cellular response to organic substance	5	EDN1,STAT6,STAT3,STAT2,CASP1	667	23	16630	5.42012	0.0421714
GO:0061014~positive regulation of mRNA catabolic process	4	MOV10,PNPT1,GTPBP1,ZC3HAV1	667	14	16630	7.12358	0.0421714
GO:0046007~negative regulation of activated T cell proliferation	4	CD274,LGALS9,IDO1,PDCD1LG2	667	14	16630	7.12358	0.0421714
GO:0035563~positive regulation of chromatin binding	4	DTX3L,ZNF618,MED25,PARP9	667	14	16630	7.12358	0.0421714
GO:0097194~execution phase of apoptosis	5	NFKBIZ,CASP10,BBC3,CASP8,CASP7	667	23	16630	5.42012	0.0421714
GO:1903608~protein localization to cytoplasmic stress granule	3	DDX3X,DCP1A,TIA1	667	7	16630	10.6854	0.0437447
GO:0002753~cytoplasmic pattern recognition receptor signaling pathway	3	ALPK1,IFIH1,DHX58	667	7	16630	10.6854	0.0437447
GO:0001816~cytokine production	3	NFAT5,NFATC3,NFATC2IP	667	7	16630	10.6854	0.0437447
GO:0032922~circadian regulation of gene expression	9	NCOA2,LGR4,ID4,NAMPT,TOP1,ID1,NOCT,MYCBP2,PML	667	71	16630	3.16046	0.0447154
GO:0043488~regulation of mRNA stability	8	PSMB10,RNASEL,PSMA3,PSMA6,PSMB9,PSMB8,FMR1,PSMB2	667	58	16630	3.43897	0.0453245
GO:0002224~toll-like receptor signaling pathway	5	NFKBIZ,TLR3,UNC93B1,CTSS,IRAK4	667	24	16630	5.19428	0.0494745
Molecular function
GO:0005515~protein binding	554	TAP1,TAP2,MOV10,RUBCN,HIPK2,B2M,PSMB9,ANKIB1,SMG1,LHX9,RNF114,ESPL1,NAPA,ABCD1,IFI27,IRAK4,NPR3,GRINA,PPP2R2A,TLK2,ZBTB33,PRRG4,GTF2F1,COL7A1,PARP14,PSME2,PARP10,PRR15,STARD4,LGR4,TNFSF10,ITGA2,MX2,MX1,BAZ2A,IFIT5,IFIT3,IFIT2,IFIT1,IRF1-AS1,STX12,JAK2,GPR37,UBXN2A,ALPK1,ZNF224,PDLIM1,TMEM123,DSP,MAGOHB,ZC3H4,TOP1,TCIRG1,SECTM1,WDFY1,PIK3CA,ATXN7,IL15RA,INA,MIA3,SAT1,OTUD4,TLE4,XIAP,TRIM56,PIK3AP1…	682	12149	16949	1.13326	1.04843e-06
GO:0003725~double-stranded RNA binding	15	ACTN1,DROSHA,DHX58,ZBP1,ADAR,EIF2AK2,SIDT1,OASL,IFIH1,OAS1,TLR3,OAS3,OAS2,DDX60,DDX60L	682	73	16949	5.10656	3.33241e-05
GO:0061630~ubiquitin protein ligase activity	33	DTX3L,TRIM38,TRIM14,BIRC3,TRIM34,XIAP,FBXO6,ANKIB1,TRIM56,TRIM44,RNF31,RNF114,MYCBP2,TOPORS,TRIM25,TRIM26,RNF43,TRIM21,TRIM22,TRIM69,HERC5,IRF2BPL,HERC6,UBR2,TRIP12,RNF19B,UBE2O,ZNRF2,RBBP6,RNF144A,TRIM5,RNF213,TRIM6	682	315	16949	2.60353	8.08135e-05
GO:0004197~cysteine-type endopeptidase activity	14	CASP7,CASP4,SFRP1,CTSL,CASP1,CTSO,CASP8,CASP10,USP33,USP11,ESPL1,USP28,USP18,CTSS	682	77	16949	4.51853	0.000264957
GO:0001730~2'-5'-oligoadenylate synthetase activity	4	OAS1,OAS3,OAS2,OASL	682	4	16949	24.8519	0.000327535
GO:0042803~protein homodimerization activity	55	TAP1,TRIM38,SNX6,SMCHD1,PSMF1,SRGAP2,RIPK1,B2M,MCL1,FMR1,USF1,SRGAP2C,NECTIN2,DROSHA,STAT3,STAT1,DPYD,TPD52,CALCOCO2,TREX1,TRIM14,TYMP,TRIM21,WARS1,CEACAM1,CARD8,NOD1,PML,MID1,GCA,NPR3,EXT1,BARD1,GBP3,GBP2,GBP1,DAB2IP,SH3GLB1,TRIM22,GBP4,ABCD1,FLRT3,TRIM34,MUC13,ACTN1,SCARB2,HMOX1,CSF1,MTCL1,STING1,BST2,MMAA,TRIM6,TRIM5,SP100	682	713	16949	1.91705	0.000347852
GO:0042605~peptide antigen binding	8	TAP1,TAP2,HLA-C,HLA-B,HLA-A,HLA-F,HLA-E,TAPBP	682	26	16949	7.64674	0.00057665
GO:0004842~ubiquitin-protein transferase activity	26	DTX3L,BIRC3,UBE2L6,XIAP,ANKIB1,TRIM56,RNF31,PML,TOPORS,BARD1,TRIM25,RNF43,TRIM21,TRIM69,HERC5,HERC6,TRIP12,UBE2O,UBA7,RBBP6,LMO7,CUL4B,RBCK1,RNF144A,TRIM5,RNF213	682	246	16949	2.62662	0.000696039
GO:0042802~identical protein binding	101	CD38,IFI27,B2M,MARCKS,MYCBP2,CDH1,RNASEL,BRCA2,IFI35,SH3GLB1,TRIM22,TRIM69,CXCL5,FN1,PSME2,CSF1,CD2AP,PLEKHA4,TLR3,BST2,MMAA,TNFSF10,MX1,DCP1A,IFIT3,CLEC7A,ZBP1,NT5E,CEACAM1,DISC1,JAK2,MYD88,TCF4,GBP3,GBP2,GBP1,GBP4,GIMAP2,TLK2,ZNF618,HMOX1,RBCK1,TRIM5,TRIM6,SAT1,NAMPT,SRGAP2,XIAP,FOXP1,PIK3AP1,STAT6,OPTN,STAT3,STAT2,STAT1,TMCC1,NECTIN2,IFI16,USF1,PML,SETX,MVP,DAB2IP,ABCD1,GRIPAP1,TRIM34,SFRP1,PL…	682	1641	16949	1.52958	0.000814992
GO:0046978~TAP1 binding	4	TAPBP,TAP1,TAP2,HLA-F	682	5	16949	19.8815	0.00105684
GO:0008656~cysteine-type endopeptidase activator activity involved in apoptotic process	7	CTSL,BCL2L13,CASP1,CARD8,NOD1,NKX3-1,CTSS	682	22	16949	7.90742	0.00135043
GO:0046977~TAP binding	3	HLA-C,HLA-B,HLA-A	682	3	16949	24.8519	0.00388284
GO:0046979~TAP2 binding	3	TAPBP,TAP1,HLA-F	682	3	16949	24.8519	0.00388284
GO:0019901~protein kinase binding	38	CIR1,TRIM14,RAD9A,KAT2B,TRIM34,TRIM38,MAP2K6,MLKL,DBF4B,RICTOR,STAT3,TRIM5,CDK12,WARS1,SLC12A7,USF1,JAK2,IRAK4,MVP,SHC1,DAB2IP,TRIM21,TRIM22,IBTK,FER,STX17,FRMD5,NRP1,MAPK8IP2,SOCS1,ZFYVE26,PTPRK,RBBP6,CYLD,STING1,SPG11,IL15RA,TRIM6	682	486	16949	1.94315	0.00432002
GO:0030881~beta-2-microglobulin binding	4	HLA-A,HFE,HLA-F,HLA-E	682	8	16949	12.426	0.00813976
GO:0005524~ATP binding	87	TAP1,TGM2,TAP2,MOV10,HIPK2,PKDCC,PI4K2B,AXL,SMG1,PIK3CA,OAS1,OAS3,OAS2,ABCD1,RNASEL,IRAK4,ENTPD5,DDX3X,CSNK1G1,HELZ2,DNAJA1,TRANK1,MST1R,ATP8B2,BMPR2,RNF213,RPS6KC1,UBE2L6,NEK7,CHD9,NEK8,JAK2,DDX60L,ALPK1,BUB1,UBA6,UBA7,DDX60,UBE2O,TLK2,TOP1,CAMKK2,UBE2Z,MDN1,EHD4,SMCHD1,MAP4K3,BRIP1,DHX58,CDKL5,MASTL,SETX,SLFN11,SLFN13,FER,EIF2AK2,MET,ABCA1,PRKD2,IFIH1,CAMK1D,RIPK1,ATP11C,MAP2K6,MLKL,NLRC5,TEP1,…	682	1484	16949	1.45695	0.0103075
GO:0015433~peptide antigen-transporting ATPase activity	3	TAPBP,TAP1,TAP2	682	4	16949	18.6389	0.0113695
GO:0097199~cysteine-type endopeptidase activity involved in apoptotic signaling pathway	4	CASP10,CASP4,CASP8,CASP1	682	10	16949	9.94076	0.0173522
GO:0003950~NAD+ ADP-ribosyltransferase activity	6	PARP9,PARP4,PARP14,PARP12,PARP10,ZC3HAV1	682	26	16949	5.73506	0.0183614
GO:1990404~protein ADP-ribosylase activity	5	PARP4,PARP14,PARP12,PARP9,PARP10	682	18	16949	6.90331	0.0211886
GO:0052739~phosphatidylserine 1-acylhydrolase activity	4	PLAAT4,PLA1A,PLAAT2,PLAAT3	682	11	16949	9.03706	0.0232188
GO:0016779~nucleotidyltransferase activity	8	PARP9,PARP4,PARP14,PARP12,OASL,PARP10,UBA6,MB21D2	682	50	16949	3.9763	0.0258233
GO:0097200~cysteine-type endopeptidase activity involved in execution phase of apoptosis	4	CASP10,CASP7,CASP4,CASP8	682	12	16949	8.28397	0.0308772
GO:0042287~MHC protein binding	3	TAP1,TAP2,CLEC7A	682	6	16949	12.426	0.0347864
GO:0043394~proteoglycan binding	4	NID1,CTSS,CTSL,FN1	682	13	16949	7.64674	0.0385147
GO:0004298~threonine-type endopeptidase activity	4	PSMB8,PSMB2,PSMB9,PSMB10	682	13	16949	7.64674	0.0385147
GO:0050484~GMP 5'-nucleotidase activity	2	NT5E,NT5C2	682	2	16949	24.8519	0.0385147
GO:0043992~histone acetyltransferase activity (H3-K9 specific)	2	KAT2B,KAT2A	682	2	16949	24.8519	0.0385147
GO:0050700~CARD domain binding	4	CASP4,CARD8,NOD1,CASP1	682	14	16949	7.10054	0.0421714
GO:0033130~acetylcholine receptor binding	4	LY6E,JAK2,RIC3,UBXN2A	682	14	16949	7.10054	0.0421714
GO:0010484~H3 histone acetyltransferase activity	3	BRCA2,KAT2B,KAT2A	682	7	16949	10.6508	0.0439564
GO:0005102~receptor binding	28	TNFSF10,BTN3A2,BTN3A3,BTN3A1,HLA-C,HLA-B,HLA-A,HLA-F,HLA-E,BTN2A1,HFE,PIK3AP1,TNFSF13B,RAB8B,STAT3,FYB1,JAK2,PLAUR,C3,NRG2,APOL2,C5,C1QL1,FLT3LG,FN1,ABCA1,FER,IL17RC	682	390	16949	1.78424	0.0494745
Cellular component
GO:0005829~cytosol	305	MDN1,TGM2,MOV10,TASOR2,DYNLL2,UBA6,PSMF1,RUBCN,UBA7,HPS5,B2M,PI4K2B,PSMB9,USP28,RNF213,PMAIP1,MBP,TRIM14,CASP8,USP33,SMG1,CEMIP2,KLF6,PIK3CA,FMNL1,GSDMD,PRMT7,OAS1,OAS3,OAS2,ESPL1,MYCBP2,NAPA,ABCD1,JAK2,TRIM21,LAP3,IRAK4,WHAMM,LIPA,BRCA2,DDX3X,SHC1,NFAT5,PRRC2C,IRF9,TRIM26,IFI35,PPP2R2A,OASL,IFI30,ZC3HAV1,SERPINB9,SEC24D,FLRT3,CSNK1G1,TRIM22,HELZ2,SH3BGRL,UBR2,RNASEL,MUC13,ZBTB33,GMPR,CASP10,XAF1…	684	5292	17594	1.48248	2.12467e-13
GO:0042824~MHC class I peptide loading complex	6	TAP1,TAP2,HLA-A,TAPBP,B2M,TAPBPL	684	9	17594	17.1481	4.55294e-05
GO:0042612~MHC class I protein complex	6	HLA-C,HLA-B,HLA-A,HLA-F,HLA-E,B2M	684	9	17594	17.1481	4.55294e-05
GO:0005737~cytoplasm	268	DTX3L,TRIM14,RAD9A,HPS5,HIPK2,NUDCD1,ANKIB1,GPR37,XPR1,SMG1,CDH1,TPD52,PIK3CA,SIX1,TRIM21,OAS1,OAS3,OAS2,ESPL1,MYCBP2,CREBRF,JAK2,PSMF1,IRAK4,AIDA,DDX3X,SHC1,BARD1,TRIM26,IFI35,TDRD7,OASL,TRIM22,NAMPT,SERPINB9,MTUS1,CSNK1G1,HELZ2,ARRDC3,SH3BGRL,UBR2,USP33,RNF19B,TRIM69,CASP10,SAMD9L,DNAJA1,SOCS1,SCARB2,PARP14,PSME2,RNF213,PARP10,CD2AP,TNFSF13B,TLR3,FOXA2,VPS13C,BST2,MMAA,ZBTB20,TCIM,STARD4,CAVIN2…	684	5333	17594	1.29262	4.95569e-05
GO:0005654~nucleoplasm	206	MDN1,ID1,TASOR2,WASHC4,RAD9A,RUBCN,HIPK2,PSMB9,USP28,TOPORS,USP33,SMG1,GLI3,GSDMD,SIX1,PRMT7,OAS1,OAS3,OAS2,MYCBP2,CREBRF,JAK2,PSMF1,LIPA,VSIG10L,BRCA2,DDX3X,BARD1,IRF9,PPP2R2A,OASL,IRF2BPL,SERPINB9,HELZ2,PCGF5,TLE4,NFAT5,XAF1,GTF2F1,RFX5,PSME2,FOXA2,BMPR2,UBC,ZBTB20,ID4,CAVIN2,FOXP1,TRIM6,CSTF3,RASSF2,MED25,KAT2B,KAT2A,TRIM34,UBE2L6,TRIM38,TCIM,ZNF224,ARID4B,LMO7,FAM76A,JADE2,NEK7,SRSF7,CHD9,ADA…	684	3879	17594	1.36602	5.48192e-05
GO:0000932~P-body	16	PAN2,MOV10,PNRC1,APOBEC3F,TRIM21,TOP1,APOBEC3B,NOCT,XRN1,DCP1A,SHFL,PSMA6,LIMD1,IGF2BP2,TRIM5,PATL1	684	98	17594	4.19955	0.000161203
GO:0005839~proteasome core complex	7	PSMB10,PSMF1,PSMA3,PSMA6,PSMB9,PSMB8,PSMB2	684	20	17594	9.00278	0.000660115
GO:0055038~recycling endosome membrane	15	RAB8B,EHD4,FZD7,HLA-C,CD274,HLA-A,SCAMP1,OPTN,HLA-F,HLA-E,B2M,GRIPAP1,ATP11C,STX12,HLA-B	684	104	17594	3.70994	0.00100452
GO:0072559~NLRP3 inflammasome complex	5	GSDMD,CASP4,CARD8,DDX3X,CASP1	684	10	17594	12.8611	0.00147127
GO:0005765~lysosomal membrane	31	DTX3L,HLA-B,HLA-A,HLA-F,MFSD12,ATP11C,CHMP5,ZFYVE26,DNAJC13,ABCD1,VPS13C,IFITM3,IFITM2,IFITM1,GNB4,CD68,LAMP3,SLC15A3,CP,PLAAT3,TMEM63A,PLD1,ZNRF2,SCARB2,ANKFY1,CD164,TCIRG1,TLR3,UBC,LNPEP,SPG11	684	358	17594	2.22734	0.00208449
GO:0030670~phagocytic vesicle membrane	12	RAB8B,TAPBP,TAP2,TAP1,HLA-C,HLA-B,HLA-A,HLA-F,HLA-E,TCIRG1,B2M,RAB43	684	76	17594	4.0614	0.00232492
GO:0070721~ISGF3 complex	3	IRF9,STAT2,STAT1	684	3	17594	25.7222	0.00363835
GO:0005634~nucleus	265	CD38,MDN1,TGM2,MOV10,DYNLL2,RAD9A,HIPK2,NUDCD1,AFF1,UBR2,C15orf48,PMAIP1,WARS1,TOPORS,IGF2BP2,SMG1,KLF6,NFE2L3,LHX9,SIX1,OAS1,RNF114,ESPL1,MYCBP2,SP110,JAK2,LAP3,IRAK4,ZNF608,BRCA2,DDX3X,BARD1,USP28,TRIM26,IFI35,PRMT7,IRF2BPL,TLK2,BAZ1A,MTUS1,CSNK1G1,SH3BGRL,PCGF5,ZNF444,NFAT5,DNAJA1,GTF2F1,MOB3C,MBP,PARP14,PARP12,RBBP6,PARP10,YEATS2,FOXA2,XRN1,RFX5,ZBTB20,ID4,EIF2AK2,PNRC1,CSTF3,ITGA2,RASSF2,MX2…	684	5604	17594	1.21634	0.00368425
GO:0000502~proteasome complex	10	ECPAS,PSMB10,PSMF1,PSME2,PSME1,PSMA3,PSMA6,PSMB9,PSMB8,PSMB2	684	58	17594	4.43487	0.00415591
GO:0043231~intracellular membrane-bounded organelle	60	CYP2J2,EHD4,RIC3,FYCO1,GPBP1,STX12,PLCH1,DBF4B,CTSL,SMARCA5,AXL,TNFSF13B,RAB8B,CEMIP2,KLF6,AMER1,BLZF1,RNF144A,OAS1,GLI3,OAS3,OAS2,DNAJC13,SYT13,SAMD9,MYCBP2,LIPA,BUB1,BARD1,AMBRA1,BST2,CA13,OASL,IFI30,RUBCN,SEC24D,GRIPAP1,LAMP3,MIA3,STS,SLC15A3,USP18,CTSS,TMEM63A,STX16,GTF2F1,PLD1,ZNRF2,RFX5,ANKFY1,FZD7,ITM2B,CES2,PDZD2,WDFY1,ABCA1,CMTR1,PTPRK,CALCOCO2,POU2F1	684	934	17594	1.65239	0.00506871
GO:0005789~endoplasmic reticulum membrane	66	CYP2J2,ERAP2,ERAP1,TAP2,UBC,SMIM14,ANO5,IFI27,CYBC1,RIC3,PNPT1,MX1,ATP11C,MAGT1,PIGY,UNC93B1,SPTSSA,RSAD2,GPR37,CLSTN3,APH1A,SLC37A1,RNF43,HLA-A,ATP8B2,TREX1,PGAP1,LPCAT3,HLA-B,ABCD1,RRBP1,APOL2,VPS13C,PLAUR,MLEC,STX17,EXT1,ATP10A,RHBDD1,ATP10D,CASP4,TMCC1,TLR3,SEC24D,FLRT3,TMX1,TAPBPL,MIA3,STS,MCFD2,SHISA5,RNF19B,PLAAT3,TAP1,KDSR,PLD1,SCARB2,HMOX1,TAPBP,ELOVL7,AGPAT3,STING1,ABCA1,PI4K2B,IL15RA,S…	684	1071	17594	1.58512	0.00720905
GO:0072562~blood microparticle	13	DNPEP,CFH,C1RL,SERPING1,CFB,FN1,LGALS3BP,C3,GRIPAP1,C1S,C1R,CP,APOL1	684	103	17594	3.24649	0.00885978
GO:0005615~extracellular space	84	FN1,ERAP1,TNFSF10,MOV10,KMO,HMOX1,HLA-A,IRAK4,HLA-F,KAT2A,DKK3,SERPINB1,B2M,SERPING1,LAMB1,HLA-B,HFE,SEMA4B,AXL,TNFSF13B,CEP164,CP,C1RL,TLR3,GSDMD,COL27A1,CBR3,HLA-C,OAS3,SERPINB9,MTUS1,IL15,C3,C2,NRG2,PRRG1,APOL1,EREG,C1QL1,ENTPD5,TSKU,CTSL,CNP,CTSO,PRRG4,IFI35,LGALS9,ACTN1,IRF2BPL,NAMPT,LGALS3BP,EDN1,FLRT3,LGALS8,FLT3LG,HLA-E,SH3BGRL,CTSS,MUC13,NRP1,CXCL16,PLA1A,CASP7,KDSR,SFRP1,CXCL5,COL7A1,CF…	684	1468	17594	1.47184	0.0100278
GO:0012507~ER to Golgi transport vesicle membrane	9	HLA-C,HLA-B,HLA-A,HLA-F,HLA-E,SEC24D,B2M,STX17,MCFD2	684	54	17594	4.28704	0.0102143
GO:0048471~perinuclear region of cytoplasm	47	RASGRP3,TGM2,EHD4,ITGA2,SLC2A12,MX1,LAMB1,NOCT,FMR1,HFE,TNFSF13B,RAB8B,OPTN,STAT1,TPD52,PIK3CA,CALCOCO2,DISC1,OAS2,CDH1,PSMF1,IFITM3,CNP,GBP3,GBP2,AMBRA1,STX16,GBP4,MVP,ABCD1,HERC5,TLK2,USP33,PLAAT3,DNAJA1,PLD1,PLSCR1,EIF2AK2,HMOX1,CSF1,CD2AP,CYLD,STING1,ABCA1,LNPEP,LAMP3,VPS54	684	710	17594	1.70274	0.012022
GO:0045335~phagocytic vesicle	10	RAB8B,TRIM14,AMBRA1,FMNL1,SRGAP2,STX12,NOD1,RAB43,ABCA1,CTSS	684	68	17594	3.78268	0.0122876
GO:0031901~early endosome membrane	18	DTX3L,IFITM3,PI4K2B,EHD4,SNX6,WASHC4,HLA-C,CD274,HLA-A,HLA-F,HLA-E,B2M,STX12,ATP11C,DNAJC13,HLA-B,PML,LAMP3	684	184	17594	2.5163	0.0131824
GO:0005741~mitochondrial outer membrane	19	SLC44A1,CPT1B,PMAIP1,TRIM14,CNP,ZNFX1,KMO,AMBRA1,SYNJ2BP,HMOX1,SH3GLB1,CASP8,RSAD2,MCL1,STING1,UBC,BBC3,IFI27,VPS13C	684	202	17594	2.41942	0.0146881
GO:0098553~lumenal side of endoplasmic reticulum membrane	6	HLA-C,HLA-B,HLA-A,HLA-F,HLA-E,TAPBP	684	26	17594	5.9359	0.0160133
GO:0071556~integral component of lumenal side of endoplasmic reticulum membrane	6	HLA-C,HLA-B,HLA-A,HLA-F,HLA-E,TAPBP	684	26	17594	5.9359	0.0160133
GO:1990111~spermatoproteasome complex	3	PSMB8,PSMB9,PSMB10	684	5	17594	15.4333	0.0204757
GO:0019774~proteasome core complex, beta-subunit complex	4	PSMB8,PSMB2,PSMB9,PSMB10	684	11	17594	9.35354	0.0214416
GO:0012505~endomembrane system	16	PLD1,ATP10A,STX16,ATP10D,SLC2A12,TMCC1,ATP8B2,PDCD1LG2,STX12,ATP11C,RAB43,STX17,PITPNM2,JAK2,TMX1,AGPAT3	684	163	17594	2.52488	0.0217989
GO:0005764~lysosome	24	DTX3L,SNX6,ARRDC3,SIDT1,RUBCN,FYCO1,MFSD12,UNC93B1,BBC3,IL4I1,VPS13C,LIPA,CTSL,CTSO,IFI30,CD68,STS,CTSS,PLAAT3,ZFYVE26,SCARB2,RPS6KC1,CD164,TCIRG1	684	300	17594	2.05778	0.023379
GO:0005886~plasma membrane	220	CD38,TGM2,DYNLL2,MLEC,SIDT1,S1PR3,B2M,SCARB2,PI4K2B,SEMA4B,AXL,CACNA1I,CEMIP2,PIK3CA,FMNL1,GSDMD,OAS3,MARCKS,MYCBP2,NAPA,CDH1,LSR,IRAK4,IFITM3,IFITM2,IFITM1,NPR3,DDX3X,SHC1,SCAMP1,XPR1,MTUS1,FLRT3,CSNK1G1,ARRDC3,SH3BGRL,MUC13,ZBTB33,CXCL16,PRRG4,RAB27B,SIPA1L1,PLD1,FN1,LIMA1,PARP14,MST1R,PPFIBP1,CD2AP,PLEKHA4,ATP8B2,SLC12A7,CYLD,XRN1,BST2,RASGRP3,ERAP1,TNFSF10,TBC1D3D,HLA-C,ANO5,ITGA2,RRAS2,HLA-F…	684	4729	17594	1.19664	0.0309154
GO:0031265~CD95 death-inducing signaling complex	3	CASP10,FAS,CASP8	684	6	17594	12.8611	0.0320622
GO:0097342~ripoptosome	3	CASP10,RIPK1,CASP8	684	6	17594	12.8611	0.0320622
GO:0044301~climbing fiber	2	C1QL1,DAB2IP	684	2	17594	25.7222	0.0385147
GO:0036464~cytoplasmic ribonucleoprotein granule	10	MOV10,BARD1,ROCK2,NFKBIZ,SERPINB1,DCP1A,FMR1,SOCS1,INA,PATL1	684	83	17594	3.09906	0.0385147
GO:0016590~ACF complex	2	BAZ1A,SMARCA5	684	2	17594	25.7222	0.0385147
GO:0090536~NoRC complex	2	BAZ2A,SMARCA5	684	2	17594	25.7222	0.0385147
GO:0032398~MHC class Ib protein complex	2	HLA-F,HLA-E	684	2	17594	25.7222	0.0385147
GO:1990531~Lem3p-Dnf1p complex	4	ATP10A,ATP11C,ATP10D,ATP8B2	684	14	17594	7.34921	0.0393294
GO:0008303~caspase complex	3	CASP7,CASP8,CASP1	684	7	17594	11.0238	0.0421714
GO:0031264~death-inducing signaling complex	3	RIPK1,FAS,CASP8	684	7	17594	11.0238	0.0421714
GO:0010008~endosome membrane	20	RIPK1,APH1A,EHD4,IRF7,MYD88,SCARB2,HLA-B,ANKFY1,UBC,CD164,TCIRG1,ITM2B,DNAJC13,RNF144A,SLC15A3,ZNRF2,STEAP2,HLA-A,IRAK4,TLR3	684	251	17594	2.04958	0.0437447

## Sheet: Table S5 (RPTEC)
GO Terms	Count	H. sapiens genes	List Total	Pop Hits	Pop Total	Fold Enrichment	Adjpval
Biological process
GO:0051607~defense response to virus	58	DTX3L,IFIH1,EIF2AK2,MOV10,IFI27,MX2,MX1,RTP4,MLKL,UNC93B1,NLRC5,IFIT5,TRIM56,IFIT3,IFIT2,IFIT1,RSAD2,OAS1,STAT2,DHX58,ADAR,TREX1,NT5C3A,IFI16,IFI44L,AZI2,OAS3,OAS2,ISG15,ZC3HAV1,MYD88,DDX60L,RNASEL,IFITM3,IFITM2,IFITM1,DDIT4,PARP9,GBP3,GBP1,SHFL,OASL,TRIM22,HERC5,DDX60,IRF7,TRIM34,SAMHD1,STAT1,PLSCR1,IFI6,IRF9,APOBEC3F,TLR3,BST2,ISG20,TRIM5,ZNFX1	225	207	16630	20.7094	8.52332e-58
GO:0045087~innate immune response	56	DTX3L,IFIH1,EIF2AK2,TRIM14,HLA-C,HLA-B,IFI27,MX2,HLA-E,MX1,B2M,TRIM38,IRF7,SLC15A3,UNC93B1,NLRC5,IFIT5,TRIM56,IFIT3,IFIT2,OPTN,DHX58,ADAR,IFI16,RSAD2,OAS1,OAS3,OAS2,ZC3HAV1,SHFL,PML,MYD88,N4BP1,SAMD9,APOL1,PARP9,TRIM25,IFI35,OASL,TRIM22,TRIM21,ISG20,HERC5,DDX60,CLU,TRIM34,SAMHD1,IFI6,PARP14,APOBEC3F,TLR3,BST2,C1S,TRIM5,ZNFX1,NMI	225	465	16630	8.90112	2.32827e-34
GO:0045071~negative regulation of viral genome replication	25	IFIH1,APOBEC3F,MX1,IFIT5,RSAD2,IFIT1,IFI16,OAS1,OAS3,OAS2,ISG15,ZC3HAV1,N4BP1,RNASEL,IFITM3,IFITM2,IFITM1,SHFL,OASL,PLSCR1,ZNFX1,EIF2AK2,PARP10,BST2,ISG20	225	43	16630	42.9716	1.64302e-33
GO:0009615~response to virus	28	IFIH1,MX2,MX1,IFIT3,IFIT2,IFIT1,DHX58,ADAR,RSAD2,OAS1,OAS3,OAS2,ISG15,ZC3HAV1,IVNS1ABP,IFITM3,IFITM2,IFITM1,OASL,TRIM22,DDX60,CLU,IRF7,EIF2AK2,BST2,ISG20,IFI44,NMI	225	106	16630	19.5237	5.80336e-26
GO:0060337~type I interferon signaling pathway	14	IFITM3,AZI2,IFITM1,IRF7,STAT2,STAT1,IFITM2,IFI27,TREX1,OAS1,OAS2,MYD88,IRF9,SP100	225	37	16630	27.9664	8.70649e-15
GO:0035456~response to interferon-beta	8	IFITM3,IFITM2,XAF1,STAT1,PLSCR1,SHFL,IFITM1,BST2	225	10	16630	59.1289	1.27432e-11
GO:0035455~response to interferon-alpha	8	IFITM3,IFITM2,IFITM1,ADAR,EIF2AK2,MX2,LAMP3,BST2	225	10	16630	59.1289	1.27432e-11
GO:0060339~negative regulation of type I interferon-mediated signaling pathway	9	SAMHD1,STAT2,ADAR,TREX1,OAS1,OAS3,ISG15,NLRC5,USP18	225	19	16630	35.0105	2.41727e-10
GO:0034341~response to interferon-gamma	9	IFITM3,IFITM2,IFITM1,STAT1,NUB1,SHFL,TRIM21,BST2,SP100	225	26	16630	25.5846	6.16112e-09
GO:0060333~interferon-gamma-mediated signaling pathway	9	IRF7,STAT1,HLA-C,HLA-B,IRF9,HLA-F,HLA-E,NMI,SP100	225	27	16630	24.637	8.37256e-09
GO:0043123~positive regulation of I-kappaB kinase/NF-kappaB signaling	18	TRIM5,TNFSF10,TRIM14,TLR3,TRIM25,SECTM1,TRIM22,TRIM21,SHISA5,LGALS9,TRIM38,ZC3HAV1,RBCK1,BST2,IFIT5,MYD88,TRIM34,RNF31	225	193	16630	6.89326	2.00899e-08
GO:0032728~positive regulation of interferon-beta production	10	IFIH1,IRF7,DHX58,OAS1,TLR3,OAS3,OAS2,ISG15,ZC3HAV1,TRIM56	225	41	16630	18.0271	2.00899e-08
GO:0046596~regulation of viral entry into host cell	7	TRIM38,TRIM14,TRIM25,TRIM21,TRIM22,TRIM34,TRIM5	225	18	16630	28.7432	2.89148e-07
GO:0051092~positive regulation of NF-kappaB transcription factor activity	15	TRIM38,TRIM14,TRIM25,EIF2AK2,TRIM21,TRIM22,TRIM34,TLR3,LGALS9,RBCK1,CLU,MYD88,TRIM5,PRKD2,RNF31	225	159	16630	6.97275	5.10642e-07
GO:0070106~interleukin-27-mediated signaling pathway	5	OAS1,OAS2,OASL,STAT1,MX1	225	7	16630	52.7937	9.59448e-07
GO:0035458~cellular response to interferon-beta	7	IFITM2,STAT1,PNPT1,TREX1,OAS1,TLR3,IFI16	225	22	16630	23.5172	1.10981e-06
GO:0006955~immune response	19	TNFSF13,IFITM2,TNFSF10,SAMHD1,IFI6,CD274,TRIM22,CD164,HLA-E,HLA-F,IFI44L,HLA-C,B2M,GTPBP1,SECTM1,GBP2,IFITM3,HLA-B,IFI44	225	326	16630	4.3077	8.13855e-06
GO:0034340~response to type I interferon	5	TRIM56,SHFL,SP100,ISG15,MX1	225	10	16630	36.9556	8.13855e-06
GO:0060700~regulation of ribonuclease activity	4	OAS1,OAS3,OAS2,OASL	225	5	16630	59.1289	1.22333e-05
GO:1900246~positive regulation of RIG-I signaling pathway	5	USP15,ZC3HAV1,OASL,DHX58,DDX60	225	11	16630	33.596	1.33928e-05
GO:0046597~negative regulation of viral entry into host cell	6	IFITM3,IFITM2,IFITM1,TRIM25,LY6E,TRIM5	225	20	16630	22.1733	1.33928e-05
GO:0045824~negative regulation of innate immune response	6	TRAFD1,DHX58,TREX1,TRIM21,IFI16,NMI	225	21	16630	21.1175	1.79208e-05
GO:0000209~protein polyubiquitination	14	TRIM38,RBCK1,TRIM14,TRIM21,TRIM22,TRIM34,UBE2L6,PSMA3,PSMB9,PSMB8,ANKIB1,TRIM2,TRIM5,RNF31	225	195	16630	5.30644	2.76997e-05
GO:0032020~ISG15-protein conjugation	4	UBE2L6,ISG15,HERC5,UBA7	225	6	16630	49.2741	2.97081e-05
GO:0042742~defense response to bacterium	11	CASP7,ZNFX1,OAS1,TLR3,OAS3,OAS2,ISG15,RBCK1,MYD88,RNF213,RNF31	225	128	16630	6.35174	7.96675e-05
GO:0002480~antigen processing and presentation of exogenous peptide antigen via MHC class I, TAP-independent	4	HLA-C,HLA-B,HLA-F,HLA-E	225	8	16630	36.9556	0.000123555
GO:0032760~positive regulation of tumor necrosis factor production	9	IFIH1,LGALS9,HLA-E,OAS1,TLR3,OAS3,OAS2,CLU,MYD88	225	95	16630	7.00211	0.000298723
GO:0001916~positive regulation of T cell mediated cytotoxicity	6	TAP2,HLA-C,HLA-B,HLA-F,HLA-E,B2M	225	35	16630	12.6705	0.000351969
GO:0039530~MDA-5 signaling pathway	3	OAS3,IRF7,IFIH1	225	4	16630	55.4333	0.000483001
GO:0045321~leukocyte activation	4	HLA-C,HLA-B,HLA-F,HLA-E	225	12	16630	24.637	0.000722513
GO:0032727~positive regulation of interferon-alpha production	5	TLR3,IFIH1,IRF7,ZC3HAV1,STAT1	225	25	16630	14.7822	0.000879005
GO:0032880~regulation of protein localization	8	TRIM38,TRIM14,TRIM25,TRIM21,TRIM22,TRIM34,RABGAP1L,TRIM5	225	85	16630	6.95634	0.000906549
GO:0098586~cellular response to virus	7	IFIH1,IFI6,ADAR,OAS1,TLR3,LGALS9,FMR1	225	63	16630	8.21235	0.000956706
GO:0032479~regulation of type I interferon production	4	TRIM56,TREX1,IRF7,TRIM21	225	13	16630	22.7419	0.000956706
GO:0002250~adaptive immune response	11	TAP1,TAP2,BTN3A1,HLA-C,HLA-B,HLA-E,LAMP3,CD274,UNC93B1,IL4I1,PRKD2	225	172	16630	4.72687	0.000971667
GO:0051091~positive regulation of sequence-specific DNA binding transcription factor activity	9	TRIM38,TRIM14,TRIM25,TRIM21,TRIM22,TRIM34,TRIM5,PRKD2,SP100	225	116	16630	5.73448	0.00113008
GO:0061014~positive regulation of mRNA catabolic process	4	MOV10,PNPT1,GTPBP1,ZC3HAV1	225	14	16630	21.1175	0.00115523
GO:0046598~positive regulation of viral entry into host cell	4	LGALS9,TRIM38,TMPRSS4,TRIM21	225	15	16630	19.7096	0.00152922
GO:0050852~T cell receptor signaling pathway	9	RBCK1,BTN3A3,BTN3A1,PSMA3,THEMIS2,PSMB9,PSMB8,PRKD2,RNF31	225	123	16630	5.40813	0.00163725
GO:0002486~antigen processing and presentation of endogenous peptide antigen via MHC class I via ER pathway, TAP-independent	4	HLA-C,HLA-B,HLA-F,HLA-E	225	16	16630	18.4778	0.00181221
GO:0032897~negative regulation of viral transcription	4	IFITM3,TRIM14,TRIM21,SP100	225	16	16630	18.4778	0.00181221
GO:0002476~antigen processing and presentation of endogenous peptide antigen via MHC class Ib	4	HLA-C,HLA-B,HLA-F,HLA-E	225	17	16630	17.3908	0.00221612
GO:0044790~negative regulation by host of viral release from host cell	4	PML,TRIM25,TRIM5,TRIM21	225	17	16630	17.3908	0.00221612
GO:0010508~positive regulation of autophagy	7	TRIM38,TRIM14,TRIM21,TRIM22,TRIM34,OPTN,TRIM5	225	77	16630	6.71919	0.00260197
GO:0002230~positive regulation of defense response to virus by host	5	PML,DTX3L,APOBEC3F,PARP9,STAT1	225	34	16630	10.8693	0.00270335
GO:0002376~immune system process	6	IRF7,IRF9,B2M,PSMB9,MYD88,RNF213	225	54	16630	8.21235	0.00270335
GO:0002479~antigen processing and presentation of exogenous peptide antigen via MHC class I, TAP-dependent	4	TAP1,PSMA3,PSMB9,PSMB8	225	21	16630	14.0783	0.00483195
GO:0071659~negative regulation of IP-10 production	2	OAS1,OAS3	225	2	16630	73.9111	0.00484269
GO:0046967~cytosol to ER transport	2	TAP1,TAP2	225	2	16630	73.9111	0.00484269
GO:0002477~antigen processing and presentation of exogenous peptide antigen via MHC class Ib	2	HLA-F,HLA-E	225	2	16630	73.9111	0.00484269
GO:0051957~positive regulation of amino acid transport	2	ACE2,CLTRN	225	2	16630	73.9111	0.00484269
GO:0002481~antigen processing and presentation of exogenous protein antigen via MHC class Ib, TAP-dependent	2	B2M,TAP2	225	2	16630	73.9111	0.00484269
GO:1905737~positive regulation of L-proline import across plasma membrane	2	ACE2,CLTRN	225	2	16630	73.9111	0.00484269
GO:0071346~cellular response to interferon-gamma	7	STAT1,GBP3,GBP2,GBP1,GBP4,TLR3,LGALS9	225	88	16630	5.87929	0.00490807
GO:0034138~toll-like receptor 3 signaling pathway	3	OAS1,TLR3,UNC93B1	225	9	16630	24.637	0.00494365
GO:0019885~antigen processing and presentation of endogenous peptide antigen via MHC class I	3	TAP1,B2M,TAP2	225	10	16630	22.1733	0.00665896
GO:0002474~antigen processing and presentation of peptide antigen via MHC class I	3	B2M,HLA-F,HLA-E	225	10	16630	22.1733	0.00665896
GO:1901224~positive regulation of NIK/NF-kappaB signaling	6	IFI35,EIF2AK2,TLR3,LGALS9,RBCK1,NMI	225	67	16630	6.61891	0.00692603
GO:0042832~defense response to protozoan	4	BATF2,GBP2,MYD88,GBP4	225	25	16630	11.8258	0.00785359
GO:0035457~cellular response to interferon-alpha	3	OAS1,IFIT3,IFIT2	225	11	16630	20.1576	0.00855553
GO:0006952~defense response	6	TAP1,STAT2,STAT1,HLA-B,MX2,MX1	225	73	16630	6.07489	0.0102829
GO:0034097~response to cytokine	5	PML,CD274,MCL1,STAT1,SP100	225	48	16630	7.69907	0.0102829
GO:0045953~negative regulation of natural killer cell mediated cytotoxicity	3	LGALS9,HLA-F,HLA-E	225	12	16630	18.4778	0.010808
GO:0097039~protein linear polyubiquitination	2	RBCK1,RNF31	225	3	16630	49.2741	0.01103
GO:0002519~natural killer cell tolerance induction	2	LGALS9,HLA-E	225	3	16630	49.2741	0.01103
GO:1902036~regulation of hematopoietic stem cell differentiation	4	PSMA3,EIF2AK2,PSMB9,PSMB8	225	30	16630	9.85481	0.0132167
GO:0071639~positive regulation of monocyte chemotactic protein-1 production	3	OAS1,OAS3,LGALS9	225	14	16630	15.8381	0.0149551
GO:0035563~positive regulation of chromatin binding	3	DTX3L,PARP9,MBD2	225	14	16630	15.8381	0.0149551
GO:0042771~intrinsic apoptotic signaling pathway in response to DNA damage by p53 class mediator	4	PML,SHISA5,IFI16,DDIT4	225	32	16630	9.23889	0.0162078
GO:0002281~macrophage activation involved in immune response	3	IFI35,TREX1,NMI	225	15	16630	14.7822	0.0175424
GO:0090501~RNA phosphodiester bond hydrolysis	3	SAMHD1,N4BP1,HELZ2	225	15	16630	14.7822	0.0175424
GO:0097193~intrinsic apoptotic signaling pathway	4	IFI6,CLU,IVNS1ABP,NBN	225	33	16630	8.95892	0.0175424
GO:0006511~ubiquitin-dependent protein catabolic process	11	DTX3L,NUB1,TRIM25,USP15,UBE2L6,PSMA3,HERC5,HERC6,ANKIB1,USP18,RNF213	225	264	16630	3.07963	0.0175424
GO:1905671~regulation of lysosome organization	2	SCARB2,TREX1	225	4	16630	36.9556	0.0176973
GO:0016553~base conversion or substitution editing	2	ADAR,APOBEC3F	225	4	16630	36.9556	0.0176973
GO:0019884~antigen processing and presentation of exogenous antigen	2	PSME2,PSME1	225	4	16630	36.9556	0.0176973
GO:2000342~negative regulation of chemokine (C-X-C motif) ligand 2 production	2	OAS1,OAS3	225	4	16630	36.9556	0.0176973
GO:1900245~positive regulation of MDA-5 signaling pathway	2	DHX58,DDX60	225	4	16630	36.9556	0.0176973
GO:0043488~regulation of mRNA stability	5	FMR1,PSMA3,RNASEL,PSMB9,PSMB8	225	58	16630	6.37165	0.0178684
GO:0045926~negative regulation of growth	3	MT1E,PNPT1,MT2A	225	16	16630	13.8583	0.0189096
GO:0034142~toll-like receptor 4 signaling pathway	3	OAS1,PIK3AP1,NMI	225	16	16630	13.8583	0.0189096
GO:0009617~response to bacterium	6	DHX58,TENT5A,HERC6,NLRC5,USP18,IFI44	225	88	16630	5.03939	0.019294
GO:0000077~DNA damage checkpoint	4	DTX3L,NBN,FBXO6,PARP9	225	36	16630	8.21235	0.0210501
GO:0060546~negative regulation of necroptotic process	3	ADPRS,RBCK1,RNF31	225	17	16630	13.0431	0.022055
GO:0019882~antigen processing and presentation	4	HLA-C,HLA-B,HLA-E,PSMB8	225	38	16630	7.78012	0.0251958
GO:0000738~DNA catabolic process, exonucleolytic	2	ISG20,TREX1	225	5	16630	29.5644	0.0257437
GO:0002457~T cell antigen processing and presentation	2	UNC93B1,TREX1	225	5	16630	29.5644	0.0257437
GO:0060335~positive regulation of interferon-gamma-mediated signaling pathway	2	NLRC5,PARP9	225	5	16630	29.5644	0.0257437
GO:0034154~toll-like receptor 7 signaling pathway	2	UNC93B1,PIK3AP1	225	5	16630	29.5644	0.0257437
GO:0070498~interleukin-1-mediated signaling pathway	4	PSMA3,MYD88,PSMB9,PSMB8	225	39	16630	7.58063	0.0266729
GO:0071360~cellular response to exogenous dsRNA	3	TLR3,IFIH1,IFIT1	225	19	16630	11.6702	0.0286685
GO:0036388~pre-replicative complex assembly	3	PSMA3,PSMB9,PSMB8	225	19	16630	11.6702	0.0286685
GO:0006521~regulation of cellular amino acid metabolic process	3	PSMA3,PSMB9,PSMB8	225	20	16630	11.0867	0.0324908
GO:0060340~positive regulation of type I interferon-mediated signaling pathway	3	NLRC5,TRIM56,IRF7	225	20	16630	11.0867	0.0324908
GO:0042157~lipoprotein metabolic process	3	APOL6,APOL2,APOL1	225	20	16630	11.0867	0.0324908
GO:0015827~tryptophan transport	2	ACE2,SLC7A5	225	6	16630	24.637	0.0347157
GO:0016567~protein ubiquitination	15	DTX3L,TRIM38,TRIM14,NUB1,TRIM21,TRIM22,TRIM34,UBA7,DCAF11,HERC5,FBXO6,HERC6,PML,TRIM5,RNF213	225	486	16630	2.28121	0.0347157
GO:0048260~positive regulation of receptor-mediated endocytosis	3	RAB21,B2M,CLU	225	21	16630	10.5587	0.0347157
GO:0042270~protection from natural killer cell mediated cytotoxicity	2	HLA-B,HLA-E	225	6	16630	24.637	0.0347157
GO:0051902~negative regulation of mitochondrial depolarization	2	IFI6,HSH2D	225	6	16630	24.637	0.0347157
GO:0060135~maternal process involved in female pregnancy	3	ACE2,LGALS9,APOL2	225	21	16630	10.5587	0.0347157
GO:0009597~detection of virus	2	TLR3,IFIH1	225	6	16630	24.637	0.0347157
GO:0045088~regulation of innate immune response	3	SAMHD1,N4BP1,DHX58	225	21	16630	10.5587	0.0347157
GO:0015833~peptide transport	2	TAP1,TAP2	225	6	16630	24.637	0.0347157
GO:0001836~release of cytochrome c from mitochondria	3	IFI6,CLU,MCL1	225	23	16630	9.64058	0.0431584
GO:0006471~protein ADP-ribosylation	3	PARP14,PARP9,PARP10	225	23	16630	9.64058	0.0431584
GO:0045893~positive regulation of transcription, DNA-templated	19	DTX3L,PARP9,TRIM38,IRF7,FUS,STAT1,TRIM25,TRIM14,TRIM21,TRIM22,PML,SPP1,TAF15,MBD2,CHURC1-FNTB,ATF4,TRIM56,TRIM5,SP100	225	707	16630	1.9863	0.0431584
GO:0061418~regulation of transcription from RNA polymerase II promoter in response to hypoxia	3	PSMA3,PSMB9,PSMB8	225	23	16630	9.64058	0.0431584
GO:0002729~positive regulation of natural killer cell cytokine production	2	HLA-F,HLA-E	225	7	16630	21.1175	0.0433947
GO:0043457~regulation of cellular respiration	2	PNPT1,TREX1	225	7	16630	21.1175	0.0433947
GO:0002753~cytoplasmic pattern recognition receptor signaling pathway	2	IFIH1,DHX58	225	7	16630	21.1175	0.0433947
GO:0032729~positive regulation of interferon-gamma production	5	TLR3,LGALS9,SLC7A5,ISG15,BTN3A1	225	76	16630	4.86257	0.0433947
GO:0022898~regulation of transmembrane transporter activity	2	ACE2,CLTRN	225	7	16630	21.1175	0.0433947
GO:0070534~protein K63-linked ubiquitination	4	TRIM56,TRIM5,TRIM21,RNF213	225	47	16630	6.29031	0.0433947
Molecular function
GO:0003725~double-stranded RNA binding	11	IFIH1,DHX58,ADAR,EIF2AK2,OASL,OAS1,TLR3,OAS3,OAS2,DDX60,DDX60L	231	73	16949	11.0561	5.10642e-07
GO:0042802~identical protein binding	52	SNX2,IFIH1,TNFSF10,FUS,SAT1,IFI27,GTPBP2,PNPT1,MX1,B2M,MLKL,FMR1,IFIT3,PIK3AP1,RNF31,OPTN,STAT2,STAT1,NT5E,IFI16,USP15,SHFL,PML,EIF2AK2,NT5C2,LDHB,GARS1,DNPEP,ANXA4,GBP3,GBP2,GBP1,IFI35,PSME2,TRIM21,TRIM22,GBP4,ATF4,TRIM34,MYD88,SAMHD1,APOBEC3F,RNASEL,PLEKHA4,TLR3,RBCK1,BST2,C1S,ACE2,NMI,TRIM5,SP100	231	1641	16949	2.32502	5.90256e-07
GO:0001730~2'-5'-oligoadenylate synthetase activity	4	OAS1,OAS3,OAS2,OASL	231	4	16949	73.3723	3.12731e-06
GO:0042605~peptide antigen binding	7	TAP1,TAP2,HLA-C,HLA-B,SLC7A5,HLA-F,HLA-E	231	26	16949	19.7541	3.74393e-06
GO:0005515~protein binding	198	PCK2,DTX3L,CLTRN,TAP2,MOV10,TRIM14,PPM1K,IFI27,B2M,ANKIB1,WARS1,RXFP1,TRIM21,NTRK3,OAS1,OAS3,OAS2,ARHGAP26,NAPA,RNASEL,IFITM3,IFITM1,DDIT4,TAP1,CTSO,TRIM25,GRINA,IFI35,TDRD7,OASL,IFI30,IRF7,DNAJA1,SAMD9L,HELZ2,SLC15A3,CENPP,XAF1,RBM43,OGFR,IVNS1ABP,CCND3,SECTM1,PARP10,APOL2,PLEKHA4,TLR3,LDHB,BST2,ACE2,PARP14,STARD4,RASGRP3,TNFSF10,FUS,HLA-C,EIF2AK2,SLC7A5,MX2,HLA-F,HLA-E,MX1,UBE2L6,EXOC3L1,UNC93B…	231	12149	16949	1.1958	1.93242e-05
GO:0004842~ubiquitin-protein transferase activity	15	DTX3L,TRIM56,UBA7,TRIM25,TRIM21,UBE2L6,ANKIB1,HERC5,RBCK1,HERC6,PML,TRIM2,TRIM5,RNF213,RNF31	231	246	16949	4.47392	8.63123e-05
GO:0061630~ubiquitin protein ligase activity	16	DTX3L,TRIM38,TRIM14,TRIM56,TRIM25,TRIM21,TRIM22,TRIM34,HERC5,FBXO6,HERC6,ANKIB1,TRIM2,TRIM5,RNF213,RNF31	231	315	16949	3.72685	0.000358013
GO:0003950~NAD+ ADP-ribosyltransferase activity	5	PARP14,PARP12,PARP9,PARP10,ZC3HAV1	231	26	16949	14.1101	0.000979082
GO:0046978~TAP1 binding	3	TAP1,TAP2,HLA-F	231	5	16949	44.0234	0.00100219
GO:0042803~protein homodimerization activity	24	TAP1,SNX2,CLTRN,TRIM38,SNX6,TRIM34,B2M,MCL1,FMR1,TRIM14,STAT1,TREX1,WARS1,PML,GBP3,GBP2,GBP1,TRIM21,TRIM22,GBP4,SCARB2,BST2,TRIM5,SP100	231	713	16949	2.46975	0.00163255
GO:0003723~RNA binding	38	IFIH1,APOBEC3F,MOV10,FUS,PNPT1,RPS2,TAF15,FMR1,IFIT5,TRIM56,IFIT3,IFIT2,IFIT1,ADAR,TRIM21,IFI16,ZC3HAV1,RRBP1,DDX60L,RNASEL,TENT5A,SPATS2L,CNP,TRIM25,SHFL,OASL,RPS29,GTPBP1,HELZ2,DDX60,CASP7,RBM43,SAMHD1,ZNFX1,EIF2AK2,PARP12,BST2,HERC5	231	1421	16949	1.9621	0.00163725
GO:0008270~zinc ion binding	26	IFIH1,TNFSF10,MT2A,TRIM14,TRIM34,TRIM38,TRIM56,DHX58,NT5E,PML,MT1E,DNPEP,TRIM21,TRIM22,RPS29,ACE2,ZCCHC2,XAF1,SAMHD1,PLSCR1,ZNFX1,APOBEC3F,CHURC1-FNTB,MMP7,TRIM2,TRIM5	231	812	16949	2.34936	0.00169557
GO:1990404~protein ADP-ribosylase activity	4	PARP14,PARP12,PARP9,PARP10	231	18	16949	16.305	0.00270335
GO:0004540~ribonuclease activity	4	SAMHD1,N4BP1,RNASEL,HELZ2	231	20	16949	14.6745	0.00412797
GO:0050484~GMP 5'-nucleotidase activity	2	NT5E,NT5C2	231	2	16949	73.3723	0.00485164
GO:0003727~single-stranded RNA binding	5	IFIT5,DDX60L,IFIH1,DHX58,DDX60	231	41	16949	8.94784	0.00571365
GO:0044389~ubiquitin-like protein ligase binding	4	DTX3L,PARP9,STAT1,STAT2	231	23	16949	12.7604	0.00605881
GO:1904680~peptide transmembrane transporter activity	2	TAP1,TAP2	231	3	16949	48.9149	0.01103
GO:0046977~TAP binding	2	HLA-C,HLA-B	231	3	16949	48.9149	0.01103
GO:0046979~TAP2 binding	2	TAP1,HLA-F	231	3	16949	48.9149	0.01103
GO:0023029~MHC class Ib protein binding	2	TAP1,TAP2	231	3	16949	48.9149	0.01103
GO:0016779~nucleotidyltransferase activity	5	PARP14,PARP12,OASL,PARP10,PARP9	231	50	16949	7.33723	0.0115013
GO:0008253~5'-nucleotidase activity	3	NT5C3A,NT5E,NT5C2	231	13	16949	16.9321	0.0127098
GO:0005525~GTP binding	14	PCK2,RAB21,EHD4,SAMHD1,GBP3,GBP2,GBP1,MX2,MX1,IFI44L,RND3,GTPBP1,GTPBP2,GBP4	231	377	16949	2.7247	0.013341
GO:0015440~peptide-transporting ATPase activity	2	TAP1,TAP2	231	4	16949	36.6861	0.0176973
GO:0015433~peptide antigen-transporting ATPase activity	2	TAP1,TAP2	231	4	16949	36.6861	0.0176973
GO:0042296~ISG15 transferase activity	2	UBE2L6,HERC5	231	4	16949	36.6861	0.0176973
GO:0050483~IMP 5'-nucleotidase activity	2	NT5E,NT5C2	231	4	16949	36.6861	0.0176973
GO:0035325~Toll-like receptor binding	2	UNC93B1,MYD88	231	6	16949	24.4574	0.0347157
GO:0042287~MHC protein binding	2	TAP1,TAP2	231	6	16949	24.4574	0.0347157
GO:0003724~RNA helicase activity	5	IFIH1,DDX60L,HELZ2,DHX58,DDX60	231	73	16949	5.0255	0.0402593
GO:0005524~ATP binding	33	NADK,TAP1,IFIH1,EHD4,MOV10,UBE2L6,TAP2,PI4K2B,MLKL,NLRC5,WARS1,DHX58,CMPK2,NTRK3,OAS1,OAS3,OAS2,RNF213,DDX60L,NT5C2,ATP10A,UBA7,HELZ2,DDX60,DNAJA1,TRANK1,EIF2AK2,ASNS,RNASEL,PDK4,SLFN5,PRKD2,GARS1	231	1484	16949	1.63159	0.0431584
GO:0070530~K63-linked polyubiquitin binding	3	OPTN,PARP10,RNF31	231	24	16949	9.17154	0.0478628
Cellular component
GO:0005829~cytosol	122	PCK2,DTX3L,MOV10,TRIM14,B2M,PI4K2B,TRIM21,OAS1,OAS3,OAS2,ARHGAP26,NAPA,RNASEL,DDIT4,TRIM25,IFI35,OASL,IFI30,HELZ2,GMPR,CENPP,XAF1,DNAJA1,IVNS1ABP,PARP14,RNF213,PARP10,BST2,CCND3,STARD4,TNFSF13,SNX2,DAPP1,SNX6,SLC7A5,MX2,MX1,UBE2L6,IFIT5,IFIT3,IFIT2,IFIT1,TREX1,NT5E,ISG15,PIK3AP1,MYD88,SAMD9,PARP9,GBP3,GBP2,GBP1,GBP4,UBA7,HERC5,DDX60,IRF7,PLSCR1,IRF9,PDZD2,RBCK1,TRIM5,GARS1,NADK,LAP3,HERC6,TRIM38,…	231	5292	17594	1.75587	9.09263e-11
GO:0005737~cytoplasm	121	CYP2J2,CLTRN,TRIM14,ANKIB1,TRIM21,NTRK3,OAS1,OAS3,OAS2,ARHGAP26,DDIT4,IFI35,TDRD7,OASL,TRIM22,HELZ2,ZCCHC2,SAMD9L,DNAJA1,SCARB2,PARP14,RNF213,PARP10,PLEKHA4,TLR3,OGFR,BST2,ACE2,CCND3,STARD4,TNFSF13,SNX2,APOBEC3F,FUS,MX2,MX1,IFIT3,IFIT2,IFIT1,ADAR,TREX1,ISG15,MT1E,MYD88,DDX60L,SAMD9,PARP9,GBP3,GBP2,GBP1,UBA7,HERC5,DDX60,IRF7,STAT1,PLSCR1,IRF9,PDZD2,TRIM2,TRIM5,GARS1,DTX3L,ADPRS,EHD4,LAP3,HERC6,TRI…	231	5333	17594	1.72809	3.44169e-10
GO:0031901~early endosome membrane	15	DTX3L,RAB21,EHD4,SNX6,SNX2,HLA-C,CD274,HLA-F,HLA-E,B2M,LAMP3,HLA-B,PML,PI4K2B,IFITM3	231	184	17594	6.20906	2.05971e-06
GO:0042612~MHC class I protein complex	5	HLA-C,HLA-B,B2M,HLA-F,HLA-E	231	9	17594	42.3136	3.84531e-06
GO:0070721~ISGF3 complex	3	IRF9,STAT2,STAT1	231	3	17594	76.1645	0.000123555
GO:0005765~lysosomal membrane	16	DTX3L,IFITM2,IFITM1,VLDLR,HLA-B,ANKFY1,SLC7A5,CD164,HLA-F,TLR3,LAMP3,SCARB2,IFITM3,SLC15A3,CHMP5,ZFYVE26	231	358	17594	3.404	0.000956706
GO:0030670~phagocytic vesicle membrane	7	TAP1,TAP2,HLA-C,HLA-B,HLA-F,HLA-E,B2M	231	76	17594	7.01515	0.00212117
GO:0055038~recycling endosome membrane	8	EHD4,HLA-C,CD274,HLA-F,HLA-E,B2M,OPTN,HLA-B	231	104	17594	5.85881	0.00221612
GO:0042824~MHC class I peptide loading complex	3	TAP1,B2M,TAP2	231	9	17594	25.3882	0.00484269
GO:0032398~MHC class Ib protein complex	2	HLA-F,HLA-E	231	2	17594	76.1645	0.00484269
GO:0098553~lumenal side of endoplasmic reticulum membrane	4	HLA-C,HLA-B,HLA-F,HLA-E	231	26	17594	11.7176	0.00801906
GO:0071556~integral component of lumenal side of endoplasmic reticulum membrane	4	HLA-C,HLA-B,HLA-F,HLA-E	231	26	17594	11.7176	0.00801906
GO:0005654~nucleoplasm	73	TNFSF13,ADPRS,TRIM38,FUS,NT5C3A,LAP3,USP15,TRIM34,TRIM14,DCAF11,MCL1,TAF15,FMR1,TRIM56,UBA7,PHF11,OPTN,RPS2,STAT2,STAT1,ADAR,NT5E,IFI16,TRIM21,OAS1,PSMA3,OAS3,OAS2,ISG15,NBN,TRIM25,SHFL,SP110,IVNS1ABP,IFITM2,SPATS2L,PARP9,NUB1,GBP2,PSMB8,PSME2,OASL,TRIM22,NDUFA9,PML,IRF9,HELZ2,HERC6,IRF7,UBE2L6,PSME1,CENPP,CASP7,XAF1,SAMHD1,HIRA,ETV7,PLSCR1,CD274,CCND3,CMPK2,RPS29,PRKD2,PSMB9,MBD2,ISG20,ATF4,CMTR…	231	3879	17594	1.43336	0.0102829
GO:0042825~TAP complex	2	TAP1,TAP2	231	3	17594	50.7763	0.0108794
GO:0008537~proteasome activator complex	2	PSME2,PSME1	231	3	17594	50.7763	0.0108794
GO:0010008~endosome membrane	11	SNX2,EHD4,IRF7,HLA-B,ANKFY1,CD164,TLR3,SCARB2,SLC15A3,MYD88,SNX25	231	251	17594	3.33789	0.0108794
GO:0012507~ER to Golgi transport vesicle membrane	5	HLA-C,HLA-B,B2M,HLA-F,HLA-E	231	54	17594	7.05227	0.0133823
GO:0000502~proteasome complex	5	PSMA3,PSME1,PSME2,PSMB9,PSMB8	231	58	17594	6.56591	0.0175424
GO:0071797~LUBAC complex	2	RBCK1,RNF31	231	4	17594	38.0823	0.0176973
GO:0030905~retromer, tubulation complex	2	SNX2,SNX6	231	4	17594	38.0823	0.0176973
GO:0048471~perinuclear region of cytoplasm	20	IFITM3,RASGRP3,EHD4,ANXA4,CNP,LAMP3,GBP3,GBP2,EIF2AK2,PLSCR1,OPTN,MX1,OAS2,DNAJA1,HERC5,SPP1,FMR1,CLU,GBP4,STAT1	231	710	17594	2.14548	0.0181222
GO:0042613~MHC class II protein complex	3	HLA-C,HLA-B,B2M	231	17	17594	13.4408	0.0205514
GO:0016020~membrane	66	TNFSF13,SNX2,EHD4,BTN3A3,HLA-C,HLA-B,SLC7A5,MX2,HLA-F,HLA-E,MX1,B2M,TAP2,PI4K2B,MCL1,FMR1,PIK3AP1,PARP14,GABARAPL1,TLR3,TMPRSS4,ADAR,NT5E,ACAA1,RPS2,NTRK3,OAS1,OAS3,OAS2,NAPA,RRBP1,IFI16,APOL2,APOL1,IFITM1,PARP9,CNP,ATP10A,GRINA,IFI35,PSME2,OASL,PLSCR1,LGALS3BP,GTPBP1,HELZ2,TMEM140,PLAAT4,CLU,VLDLR,TAP1,DNAJA1,TMEM62,OGFR,SCARB2,ANKFY1,EIF2AK2,RTP4,SECTM1,NPNT,SYT14,LDHB,BST2,CCND3,RNF213,NMI	231	3581	17594	1.40376	0.0251958
GO:1990111~spermatoproteasome complex	2	PSMB9,PSMB8	231	5	17594	30.4658	0.0251958
GO:0005839~proteasome core complex	3	PSMA3,PSMB9,PSMB8	231	20	17594	11.4247	0.0304674
GO:0016605~PML body	6	HIRA,ISG20,NBN,PML,N4BP1,SP100	231	104	17594	4.39411	0.0343187
GO:0043186~P granule	3	TDRD7,MOV10,HELZ2	231	22	17594	10.3861	0.0363581
GO:0070062~extracellular exosome	41	TNFSF13,CYP2J2,CLTRN,EHD4,HLA-C,HLA-B,LAP3,SLC7A5,HLA-E,B2M,TNFSF10,RPS2,CHMP5,NT5E,WARS1,PSMA3,NAPA,LDHB,ANXA4,CNP,PSMB8,PSME2,PSME1,LGALS3BP,MMP7,SCARB2,CLU,RPS29,RAB21,DNAJA1,HIRA,PLSCR1,CD274,ANKFY1,SECTM1,NPNT,SPP1,PSMB9,BST2,ACE2,GARS1	231	2033	17594	1.53603	0.0422123

## Sheet: Table S5 (PaKiT03)
GO Terms	Count	P. alecto genes	List Total	Pop Hits	Pop Total	Fold Enrichment	Adjpval
Biological process
GO:0051607~defense response to virus	38	DTX3L,LOC102889295 (DDX60),MOV10,MX2,IFIH1,MX1,RTP4,MLKL,NLRC5,IFIT3,IFIT2,STAT2,DHX58,LOC102888017 (IFITM3),ZBP1,ADAR,TREX1,OAS1,LOC102878285 (IFIT1),OAS3,OAS2,ISG15,ZC3HAV1,RNASEL,LOC102885856 (GBP1),LOC112484226 (APOBEC3ZBa),LOC102888261 (TRIM34),PARP9,OASL,TRIM22,HERC5,IRF7,STAT1,LOC102893173,IFI6,IRF9,EIF2AK2,BST2	91	154	11950	32.4033	3.86805e-46
GO:0045087~innate immune response	36	DTX3L,LOC102889295 (DDX60),TRIM14,MX2,IFIH1,MX1,B2M,NLRC5,IFIT3,IFIT2,DHX58,ZBP1,ADAR,OAS1,OAS3,OAS2,ZC3HAV1,PML,SAMD9,LOC112484226 (APOBEC3ZBa),LOC102888261 (TRIM34),PARP9,TRIM25,TRIM26,IFI35,OASL,TRIM22,TRIM21,HERC5,IRF7,LOC102893173 (TRIM34L),IFI6,PARP14,EIF2AK2,BST2,NMI	91	311	11950	15.2009	4.51741e-31
GO:0009615~response to virus	21	LOC102889295 (DDX60),ZC3HAV1,IRF7,DHX58,LOC102888017 (IFITM3),ADAR,EIF2AK2,MX2,OASL,IFIH1,MX1,OAS1,LOC102878285 (IFIT1),OAS3,OAS2,ISG15,TRIM22,BST2,IFIT3,IFIT2,NMI	91	75	11950	36.7692	1.34975e-25
GO:0045071~negative regulation of viral genome replication	15	LOC112484226 (APOBEC3ZBa),IFIH1,LOC102888017 (IFITM3),EIF2AK2,OASL,PARP10,MX1,OAS1,LOC102878285 (IFIT1),OAS3,OAS2,ISG15,ZC3HAV1,BST2,RNASEL	91	30	11950	65.6593	1.69567e-22
GO:0060339~negative regulation of type I interferon-mediated signaling pathway	8	STAT2,ADAR,TREX1,OAS1,OAS3,OAS2,ISG15,NLRC5	91	17	11950	61.797	3.63456e-11
GO:0019885~antigen processing and presentation of endogenous peptide antigen via MHC class I	6	TAP1,ERAP2,ERAP1,TAP2,TAPBP,B2M	91	8	11950	98.489	7.27975e-10
GO:0060337~type I interferon signaling pathway	8	IRF7,STAT2,STAT1,IRF9,TREX1,OAS1,LOC102888017 (IFITM3),SP100	91	29	11950	36.2258	3.30958e-09
GO:0034341~response to interferon-gamma	7	STAT1,NUB1,CALCOCO2,TRIM21,LOC102888017 (IFITM3),BST2,SP100	91	18	11950	51.0684	3.34165e-09
GO:0046596~regulation of viral entry into host cell	6	LOC102888261 (TRIM34),TRIM14,LOC102893173 (TRIM34),TRIM25,TRIM21,TRIM22	91	12	11950	65.6593	1.27868e-08
GO:0032728~positive regulation of interferon-beta production	8	IFIH1,IRF7,DHX58,OAS1,OAS3,OAS2,ISG15,ZC3HAV1	91	36	11950	29.1819	1.6757e-08
GO:0035455~response to interferon-alpha	5	LOC102888017 (IFITM3),ADAR,EIF2AK2,MX2,BST2	91	7	11950	93.7991	3.2507e-08
GO:0044790~negative regulation by host of viral release from host cell	6	LOC102888261 (TRIM34),LOC102893173 (TRIM34L),TRIM25,TRIM26,TRIM21,PML	91	17	11950	46.3478	1.21812e-07
GO:0060700~regulation of ribonuclease activity	4	OAS1,OAS3,OAS2,OASL	91	5	11950	105.055	7.87941e-07
GO:0039530~MDA-5 signaling pathway	4	OAS3,OAS2,IRF7,IFIH1	91	5	11950	105.055	7.87941e-07
GO:0070106~interleukin-27-mediated signaling pathway	4	OAS1,OASL,STAT1,MX1	91	6	11950	87.5458	2.12624e-06
GO:0032020~ISG15-protein conjugation	4	UBE2L6,ISG15,HERC5,UBA7	91	6	11950	87.5458	2.12624e-06
GO:0046597~negative regulation of viral entry into host cell	5	LOC102888017 (IFITM3),TRIM26,LOC102888261 (TRIM34),LOC102893173 (TRIM34L),TRIM25	91	15	11950	43.7729	2.81917e-06
GO:0035456~response to interferon-beta	4	LOC102888017 (IFITM3),XAF1,STAT1,BST2	91	7	11950	75.0392	4.50343e-06
GO:0060333~interferon-gamma-mediated signaling pathway	5	IRF9,SP100,IRF7,STAT1,NMI	91	19	11950	34.5575	9.01735e-06
GO:0071659~negative regulation of IP-10 production	3	OAS1,OAS3,OAS2	91	3	11950	131.319	1.46027e-05
GO:0051091~positive regulation of sequence-specific DNA binding transcription factor activity	8	LOC102888261 (TRIM34),TRIM14, LOC102893173 (TRIM34L),TRIM25,TRIM26,TRIM21,TRIM22,SP100	91	92	11950	11.419	1.50762e-05
GO:0098586~cellular response to virus	6	IFIH1,IFI6,ADAR,OAS1,LGALS9,FMR1	91	43	11950	18.3235	2.47698e-05
GO:0071639~positive regulation of monocyte chemotactic protein-1 production	4	OAS1,OAS3,OAS2,LGALS9	91	11	11950	47.7522	2.80605e-05
GO:1900246~positive regulation of RIG-I signaling pathway	4	LOC102889295 (DDX60),OASL,DHX58,ZC3HAV1	91	11	11950	47.7522	2.80605e-05
GO:0002474~antigen processing and presentation of peptide antigen via MHC class I	3	ERAP2,B2M,ERAP1	91	4	11950	98.489	4.36251e-05
GO:2000342~negative regulation of chemokine (C-X-C motif) ligand 2 production	3	OAS1,OAS3,OAS2	91	5	11950	78.7912	9.62788e-05
GO:0015833~peptide transport	3	TAPBP,TAP1,TAP2	91	5	11950	78.7912	9.62788e-05
GO:0032897~negative regulation of viral transcription	4	LOC102888017 (IFITM3),TRIM14,TRIM21,SP100	91	15	11950	35.0183	9.62788e-05
GO:0051092~positive regulation of NF-kappaB transcription factor activity	8	LOC102888261 (TRIM34),TRIM14, LOC102893173 (TRIM34L),TRIM25,EIF2AK2,TRIM21,TRIM22,LGALS9	91	125	11950	8.4044	0.000104733
GO:0043123~positive regulation of I-kappaB kinase/NF-kappaB signaling	9	LOC102888261 (TRIM34),TRIM14, LOC102893173 (TRIM34L),TRIM25,TRIM21,TRIM22,LGALS9,ZC3HAV1,BST2	91	167	11950	7.07705	0.000104744
GO:0000209~protein polyubiquitination	9	LOC102888261 (TRIM34),TRIM14, LOC102893173 (TRIM34L),PSMB10,TRIM21,TRIM22,UBE2L6,PSMB9,PSMB8	91	170	11950	6.95217	0.000118463
GO:0002376~immune system process	5	B2M,IRF7,IRF9,PSMB9,RNF213	91	36	11950	18.2387	0.000146034
GO:0032727~positive regulation of interferon-alpha production	4	IFIH1,IRF7,ZC3HAV1,STAT1	91	18	11950	29.1819	0.000169855
GO:0045824~negative regulation of innate immune response	4	TREX1,TRIM21,DHX58,NMI	91	18	11950	29.1819	0.000169855
GO:0032880~regulation of protein localization	6	LOC102888261 (TRIM34),TRIM14, LOC102893173 (TRIM34L),TRIM25,TRIM21,TRIM22	91	65	11950	12.1217	0.000178367
GO:0016567~protein ubiquitination	13	DTX3L,LOC102888261 (TRIM34),TRIM14. LOC102893173 (TRIM34L),NUB1,TRIM26,TRIM21,TRIM22,UBA7,HERC5,HERC6,PML,RNF213	91	407	11950	4.19445	0.000216281
GO:0002479~antigen processing and presentation of exogenous peptide antigen via MHC class I, TAP-dependent	4	TAP1,PSMB8,PSMB9,PSMB10	91	20	11950	26.2637	0.000250775
GO:0006952~defense response	5	TAP1,MX2,STAT2,STAT1,MX1	91	44	11950	14.9226	0.000342656
GO:0070212~protein poly-ADP-ribosylation	3	PARP14,PARP15,PARP10	91	8	11950	49.2445	0.000390735
GO:0002230~positive regulation of defense response to virus by host	4	PML,DTX3L,PARP9,STAT1	91	24	11950	21.8864	0.000491008
GO:0034340~response to type I interferon	3	SP100,ISG15,MX1	91	9	11950	43.7729	0.000563111
GO:0035457~cellular response to interferon-alpha	3	OAS1,IFIT3,IFIT2	91	10	11950	39.3956	0.000786675
GO:0046967~cytosol to ER transport	2	TAP1,TAP2	91	2	11950	131.319	0.000829458
GO:0035395~negative regulation of chemokine (C-X-C motif) ligand 9 production	2	OAS3,OAS2	91	2	11950	131.319	0.000829458
GO:0002481~antigen processing and presentation of exogenous protein antigen via MHC class Ib, TAP-dependent	2	B2M,TAP2	91	2	11950	131.319	0.000829458
GO:0043488~regulation of mRNA stability	5	FMR1,PSMB8,RNASEL,PSMB9,PSMB10	91	54	11950	12.1591	0.000829458
GO:1902036~regulation of hematopoietic stem cell differentiation	4	PSMB8,EIF2AK2,PSMB9,PSMB10	91	29	11950	18.1129	0.000896068
GO:0002281~macrophage activation involved in immune response	3	IFI35,TREX1,NMI	91	11	11950	35.8142	0.000909055
GO:0010468~regulation of gene expression	8	LOC102888261 (TRIM34),TRIM14, LOC102893173 (TRIM34L),TRIM26,TRIM21,TRIM22,TAPBP,RNASEL	91	182	11950	5.77225	0.00095469
GO:0042742~defense response to bacterium	5	OAS1,OAS3,OAS2,ISG15,RNF213	91	60	11950	10.9432	0.00116269
GO:0032479~regulation of type I interferon production	3	TREX1,IRF7,TRIM21	91	13	11950	30.3043	0.00142701
GO:0035458~cellular response to interferon-beta	3	OAS1,TREX1,STAT1	91	14	11950	28.1397	0.00175057
GO:0010508~positive regulation of autophagy	5	LOC102893173 (TRIM34L),LOC102888261 (TRIM34),TRIM14,TRIM22,TRIM21	91	68	11950	9.65579	0.00190675
GO:0060335~positive regulation of interferon-gamma-mediated signaling pathway	2	NLRC5,PARP9	91	3	11950	87.5458	0.00190675
GO:0032760~positive regulation of tumor necrosis factor production	5	OAS1,OAS3,OAS2,LGALS9,IFIH1	91	70	11950	9.37991	0.0020428
GO:0070534~protein K63-linked ubiquitination	4	LOC102893173 (TRIM34L),LOC102888261 (TRIM34),TRIM21,RNF213	91	41	11950	12.8116	0.00276258
GO:0060340~positive regulation of type I interferon-mediated signaling pathway	3	NLRC5,IRF7,ZBP1	91	17	11950	23.1739	0.00282777
GO:0006521~regulation of cellular amino acid metabolic process	3	PSMB8,PSMB9,PSMB10	91	18	11950	21.8864	0.00323256
GO:0036388~pre-replicative complex assembly	3	PSMB8,PSMB9,PSMB10	91	18	11950	21.8864	0.00323256
GO:0006471~protein ADP-ribosylation	3	PARP14,PARP9,PARP10	91	18	11950	21.8864	0.00323256
GO:1900245~positive regulation of MDA-5 signaling pathway	2	LOC102889295 (DDX60),DHX58	91	4	11950	65.6593	0.00336854
GO:0006511~ubiquitin-dependent protein catabolic process	8	DTX3L,NUB1,TRIM25,UBE2L6,HERC5,HERC6,USP18,RNF213	91	238	11950	4.41407	0.00435918
GO:0031664~regulation of lipopolysaccharide-mediated signaling pathway	2	LOC102888261 (TRIM34), LOC102893173 (TRIM34L)	91	5	11950	52.5275	0.00535417
GO:0061418~regulation of transcription from RNA polymerase II promoter in response to hypoxia	3	PSMB8,PSMB9,PSMB10	91	22	11950	17.9071	0.00555811
GO:1901224~positive regulation of NIK/NF-kappaB signaling	4	LGALS9,EIF2AK2,IFI35,NMI	91	52	11950	10.1014	0.00598708
GO:0009617~response to bacterium	4	NLRC5,ERAP1,DHX58,HERC6	91	55	11950	9.55045	0.00734126
GO:0071650~negative regulation of chemokine (C-C motif) ligand 5 production	2	OAS3,OAS2	91	6	11950	43.7729	0.00747348
GO:0039529~RIG-I signaling pathway	2	OAS3,OAS2	91	6	11950	43.7729	0.00747348
GO:0050688~regulation of defense response to virus	2	LOC102878285 (IFIT1),HERC5	91	6	11950	43.7729	0.00747348
GO:0002753~cytoplasmic pattern recognition receptor signaling pathway	2	IFIH1,DHX58	91	6	11950	43.7729	0.00747348
GO:0010972~negative regulation of G2/M transition of mitotic cell cycle	3	PSMB8,PSMB9,PSMB10	91	25	11950	15.7582	0.00764073
GO:0002218~activation of innate immune response	3	ZBP1,LOC102888261 (TRIM34), LOC102893173 (TRIM34L)	91	26	11950	15.1522	0.00835986
GO:0007259~JAK-STAT cascade	3	STAT2,STAT1,NMI	91	26	11950	15.1522	0.00835986
GO:0071346~cellular response to interferon-gamma	4	LOC102882275 (GBP6),LGALS9,STAT1,LOC102885856 (GBP1)	91	60	11950	8.75458	0.00938495
GO:0098792~xenophagy	2	CALCOCO2,RNF213	91	7	11950	37.5196	0.00972739
GO:0019941~modification-dependent protein catabolic process	2	UBA7,ISG15	91	7	11950	37.5196	0.00972739
GO:0033209~tumor necrosis factor-mediated signaling pathway	4	PSMB8,STAT1,PSMB9,PSMB10	91	61	11950	8.61106	0.00972739
GO:0010498~proteasomal protein catabolic process	3	PSMB8,PSMB9,PSMB10	91	30	11950	13.1319	0.0122246
GO:0001913~T cell mediated cytotoxicity	2	B2M,TAP2	91	8	11950	32.8297	0.0123773
GO:0002237~response to molecule of bacterial origin	2	B2M,TAP2	91	8	11950	32.8297	0.0123773
GO:0002223~stimulatory C-type lectin receptor signaling pathway	3	PSMB8,PSMB9,PSMB10	91	32	11950	12.3111	0.0140508
GO:0045893~positive regulation of transcription, DNA-templated	12	DTX3L,IRF7,PARP9,STAT1,TRIM25,TRIM14,TRIM21,TRIM22,PML,LOC102888261 (TRIM34), LOC102893173 (TRIM34L),SP100	91	601	11950	2.622	0.014886
GO:0035194~posttranscriptional gene silencing by RNA	2	MOV10,HELZ2	91	9	11950	29.1819	0.0149101
GO:0055085~transmembrane transport	6	TAP1,TAP2,PSMB10,SLC22A31,PSMB9,PSMB8	91	172	11950	4.58088	0.0149101
GO:0006228~UTP biosynthetic process	2	LOC102895293 (NME1), LOC102888630 (NDKB)	91	9	11950	29.1819	0.0149101
GO:0070498~interleukin-1-mediated signaling pathway	3	PSMB8,PSMB9,PSMB10	91	34	11950	11.5869	0.0159867
GO:0038095~Fc-epsilon receptor signaling pathway	3	PSMB8,PSMB9,PSMB10	91	35	11950	11.2559	0.0169945
GO:0038061~NIK/NF-kappaB signaling	3	PSMB8,PSMB9,PSMB10	91	35	11950	11.2559	0.0169945
GO:0006241~CTP biosynthetic process	2	LOC102895293 (NME1), LOC102888630 (NDKB)	91	10	11950	26.2637	0.0175838
GO:0034356~NAD biosynthesis via nicotinamide riboside salvage pathway	2	PARP9,PARP10	91	10	11950	26.2637	0.0175838
GO:0006183~GTP biosynthetic process	2	LOC102895293 (NME1), LOC102888630 (NDKB)	91	10	11950	26.2637	0.0175838
GO:0072711~cellular response to hydroxyurea	2	FMR1,TREX1	91	11	11950	23.8761	0.0210729
GO:0061635~regulation of protein complex stability	2	TAPBP,TREX1	91	11	11950	23.8761	0.0210729
GO:0031145~anaphase-promoting complex-dependent catabolic process	3	PSMB8,PSMB9,PSMB10	91	39	11950	10.1014	0.022206
GO:0034097~response to cytokine	3	PML,STAT1,SP100	91	40	11950	9.8489	0.0237036
GO:0043171~peptide catabolic process	2	ERAP2,ERAP1	91	12	11950	21.8864	0.0241067
GO:0070213~protein auto-ADP-ribosylation	2	PARP12,PARP10	91	12	11950	21.8864	0.0241067
GO:0046598~positive regulation of viral entry into host cell	2	LGALS9,TRIM21	91	12	11950	21.8864	0.0241067
GO:0034142~toll-like receptor 4 signaling pathway	2	OAS1,NMI	91	13	11950	20.2029	0.0279581
GO:0061014~positive regulation of mRNA catabolic process	2	MOV10,ZC3HAV1	91	14	11950	18.7598	0.0315855
GO:0035563~positive regulation of chromatin binding	2	DTX3L,PARP9	91	14	11950	18.7598	0.0315855
GO:0002250~adaptive immune response	4	TAP1,ERAP2,ERAP1,TAP2	91	92	11950	5.70951	0.0334826
GO:0016579~protein deubiquitination	4	USP18,PSMB8,PSMB9,PSMB10	91	93	11950	5.64812	0.0345393
GO:0001916~positive regulation of T cell mediated cytotoxicity	2	B2M,TAP2	91	15	11950	17.5092	0.0352799
GO:0046968~peptide antigen transport	1	TAP2	91	1	11950	131.319	0.0372159
GO:0002489~antigen processing and presentation of endogenous peptide antigen via MHC class Ib via ER pathway, TAP-dependent	1	TAP2	91	1	11950	131.319	0.0372159
GO:0072308~negative regulation of metanephric nephron tubule epithelial cell differentiation	1	STAT1	91	1	11950	131.319	0.0372159
GO:0071283~cellular response to iron(III) ion	1	B2M	91	1	11950	131.319	0.0372159
GO:0050823~peptide antigen stabilization	1	TAPBP	91	1	11950	131.319	0.0372159
GO:0002566~somatic diversification of immune receptors via somatic mutation	1	ADAR	91	1	11950	131.319	0.0372159
GO:0071360~cellular response to exogenous dsRNA	2	LOC102878285 (IFIT1),IFIH1	91	16	11950	16.4148	0.0372159
GO:0045185~maintenance of protein location	1	SP100	91	1	11950	131.319	0.0372159
GO:1901254~positive regulation of intracellular transport of viral material	1	FMR1	91	1	11950	131.319	0.0372159
GO:0039528~cytoplasmic pattern recognition receptor signaling pathway in response to virus	1	IFIH1	91	1	11950	131.319	0.0372159
GO:0002485~antigen processing and presentation of endogenous peptide antigen via MHC class I via ER pathway, TAP-dependent	1	TAP2	91	1	11950	131.319	0.0372159
GO:0034463~90S preribosome assembly	1	RPL38	91	1	11950	131.319	0.0372159
GO:0060071~Wnt signaling pathway, planar cell polarity pathway	3	PSMB8,PSMB9,PSMB10	91	50	11950	7.87912	0.0372159
GO:0002737~negative regulation of plasmacytoid dendritic cell cytokine production	1	BST2	91	1	11950	131.319	0.0372159
GO:0010522~regulation of calcium ion transport into cytosol	1	PML	91	1	11950	131.319	0.0372159
GO:1900369~negative regulation of RNA interference	1	ADAR	91	1	11950	131.319	0.0372159
GO:0044355~clearance of foreign intracellular DNA	1	LOC112484226 (APOBEC3ZBa)	91	1	11950	131.319	0.0372159
GO:0016553~base conversion or substitution editing	1	ADAR	91	1	11950	131.319	0.0372159
GO:0070241~positive regulation of activated T cell autonomous cell death	1	LGALS9	91	1	11950	131.319	0.0372159
GO:1900225~regulation of NLRP3 inflammasome complex assembly	1	EIF2AK2	91	1	11950	131.319	0.0372159
GO:0071357~cellular response to type I interferon	1	LOC102878285 (IFIT1)	91	1	11950	131.319	0.0372159
GO:0032938~negative regulation of translation in response to oxidative stress	1	PML	91	1	11950	131.319	0.0372159
GO:0097281~immune complex formation	1	TREX1	91	1	11950	131.319	0.0372159
GO:0032834~positive regulation of CD4-positive, CD25-positive, alpha-beta regulatory T cell differentiation involved in immune response	1	LGALS9	91	1	11950	131.319	0.0372159
GO:2001034~positive regulation of double-strand break repair via nonhomologous end joining	2	DTX3L,PARP9	91	17	11950	15.4493	0.0372159
GO:0002383~immune response in brain or nervous system	1	TREX1	91	1	11950	131.319	0.0372159
GO:0032197~transposition, RNA-mediated	1	TREX1	91	1	11950	131.319	0.0372159
GO:0034127~regulation of MyD88-independent toll-like receptor signaling pathway	1	IRF7	91	1	11950	131.319	0.0372159
GO:0048384~retinoic acid receptor signaling pathway	2	PML,SP100	91	17	11950	15.4493	0.0372159
GO:0060330~regulation of response to interferon-gamma	1	PARP9	91	1	11950	131.319	0.0372159
GO:0032469~endoplasmic reticulum calcium ion homeostasis	2	PML,GRINA	91	16	11950	16.4148	0.0372159
GO:0034344~regulation of type III interferon production	1	IFIH1	91	1	11950	131.319	0.0372159
GO:0002398~MHC class Ib protein complex assembly	1	TAPBP	91	1	11950	131.319	0.0372159
GO:0045089~positive regulation of innate immune response	2	IFI35,NMI	91	18	11950	14.591	0.0391811
GO:0006955~immune response	5	TAPBP,IFI6,B2M,TRIM22,LOC102888017 (IFITM3)	91	171	11950	3.83973	0.0466031
GO:0045088~regulation of innate immune response	2	ERAP1,DHX58	91	20	11950	13.1319	0.0472247
Molecular function
GO:0003725~double-stranded RNA binding	10	LOC102889295 (DDX60),DHX58,ZBP1,ADAR,EIF2AK2,OASL,IFIH1,OAS1,OAS3,OAS2	94	59	12270	22.1241	2.69201e-09
GO:0001730~2'-5'-oligoadenylate synthetase activity	4	OAS1,OAS3,OAS2,OASL	94	4	12270	130.532	1.93226e-07
GO:0003950~NAD+ ADP-ribosyltransferase activity	6	PARP9,PARP14,PARP15,PARP12,PARP10,ZC3HAV1	94	22	12270	35.5996	6.54581e-07
GO:1990404~protein ADP-ribosylase activity	5	PARP14,PARP15,PARP12,PARP9,PARP10	94	18	12270	36.2589	7.19011e-06
GO:0004842~ubiquitin-protein transferase activity	11	DTX3L,LOC102888261 (TRIM34), LOC102893173 (TRIM34L),TRIM25,TRIM21,UBE2L6,UBA7,HERC5,HERC6,PML,RNF213	94	213	12270	6.74108	2.07958e-05
GO:0016779~nucleotidyltransferase activity	6	PARP9,PARP14,PARP15,PARP12,OASL,PARP10	94	43	12270	18.2138	2.49659e-05
GO:0046978~TAP1 binding	3	TAPBP,TAP1,TAP2	94	4	12270	97.8989	4.36251e-05
GO:0015433~peptide antigen-transporting ATPase activity	3	TAPBP,TAP1,TAP2	94	4	12270	97.8989	4.36251e-05
GO:0061630~ubiquitin protein ligase activity	11	DTX3L,LOC102888261 (TRIM34),TRIM14, LOC102893173 (TRIM34L),TRIM25,TRIM26,TRIM21,TRIM22,HERC5,HERC6,RNF213	94	256	12270	5.60879	9.62788e-05
GO:0042803~protein homodimerization activity	16	TAP1,LOC102888261 (TRIM34),TRIM14,STAT1,LOC102882275 (GBP6),CALCOCO2,TREX1,TRIM21,TRIM22,FMR1,B2M,BST2,PML,LOC102885856 (GBP1),LOC102893173 (TRIM34L),SP100	94	574	12270	3.63852	0.000136649
GO:0003723~RNA binding	25	LOC102889295 (DDX60),MOV10,IFIH1,FMR1,IFIT3,IFIT2,ZBP1,ADAR,LOC102878285 (IFIT1),HNRNPA2B1,TRIM25,RRBP1,RNASEL,ZC3HAV1,LOC112484226 (APOBEC3ZBa),HNRNPA3,OASL,TRIM21,HERC5,HELZ2,RPL38,DDX24,EIF2AK2,PARP12,BST2	94	1290	12270	2.52969	0.000169855
GO:0044389~ubiquitin-like protein ligase binding	4	DTX3L,PARP9,STAT1,STAT2	94	21	12270	24.8632	0.000310066
GO:0005524~ATP binding	24	TAP1,LOC102889295 (DDX60),EHD4,MOV10,IFIH1,UBE2L6,TAP2,MLKL,NLRC5,DHX58,CMPK2,OAS1,OAS3,OAS2,RNASEL, LOC102888630 (NDKB),LOC102895293 (NME1),UBA7,HELZ2,TRANK1,DDX24,EIF2AK2,SRXN1,RNF213	94	1270	12270	2.46674	0.000365037
GO:0046979~TAP2 binding	2	TAPBP,TAP1	94	2	12270	130.532	0.000829458
GO:0023029~MHC class Ib protein binding	2	TAP1,TAP2	94	2	12270	130.532	0.000829458
GO:0004175~endopeptidase activity	5	ERAP2,ERAP1,PSMB8,PSMB9,PSMB10	94	56	12270	11.6546	0.000909055
GO:0042605~peptide antigen binding	3	TAPBP,TAP1,TAP2	94	12	12270	32.633	0.00116269
GO:0042802~identical protein binding	23	IFIH1,MX1,B2M,MLKL,FMR1,IFIT3,STAT2,STAT1,ZBP1,LOC102882275 (GBP6),HNRNPA2B1,PML,RNASEL,LOC102885856 (GBP1),LOC102888261 (TRIM34),IFI35,TRIM21,TRIM22, LOC102893173 (TRIM34L),EIF2AK2,BST2,SP100,NMI	94	1311	12270	2.29003	0.00133231
GO:0003724~RNA helicase activity	5	IFIH1,LOC102889295 (DDX60),HELZ2,DHX58,DDX24	94	63	12270	10.3597	0.00142701
GO:0004298~threonine-type endopeptidase activity	3	PSMB8,PSMB9,PSMB10	94	13	12270	30.1227	0.00142701
GO:0015440~peptide-transporting ATPase activity	2	TAP1,TAP2	94	3	12270	87.0213	0.00190675
GO:0003726~double-stranded RNA adenosine deaminase activity	2	ZBP1,ADAR	94	3	12270	87.0213	0.00190675
GO:1904680~peptide transmembrane transporter activity	2	TAP1,TAP2	94	3	12270	87.0213	0.00190675
GO:0042287~MHC protein binding	2	TAP1,TAP2	94	3	12270	87.0213	0.00190675
GO:0008270~zinc ion binding	14	LOC112484226 (APOBEC3ZBa),LOC102893426,XAF1,LOC102888261 (TRIM34),TRIM14,DHX58,ERAP2,TRIM26,ERAP1,IFIH1,TRIM21,TRIM22,PML, LOC102893173 (TRIM34L)	94	623	12270	2.9333	0.00280699
GO:0004550~nucleoside diphosphate kinase activity	3	LOC102895293 (NME1), LOC102888630 (NDKB),CMPK2	94	17	12270	23.035	0.00284938
GO:0042296~ISG15 transferase activity	2	UBE2L6,HERC5	94	4	12270	65.266	0.00336854
GO:0097677~STAT family protein binding	2	DTX3L,PARP9	94	8	12270	32.633	0.0123773
GO:0038187~pattern recognition receptor activity	2	LOC102888261 (TRIM34), LOC102893173 (TRIM34L)	94	8	12270	32.633	0.0123773
GO:0042288~MHC class I protein binding	2	TAPBP,TAP1	94	8	12270	32.633	0.0123773
GO:0003713~transcription coactivator activity	7	LOC102888261 (TRIM34),TRIM14, LOC102893173 (TRIM34L),TRIM25,TRIM21,TRIM22,PML	94	230	12270	3.97271	0.0147215
GO:0003727~single-stranded RNA binding	3	LOC102889295 (DDX60),IFIH1,DHX58	94	34	12270	11.5175	0.01615
GO:0016887~ATPase activity	8	TAP1,LOC102889295 (DDX60),TAP2,MOV10,DHX58,DDX24,IFIH1,RNF213	94	339	12270	3.0804	0.0288036
GO:0070403~NAD+ binding	2	PARP14,PARP15	94	15	12270	17.4043	0.0352799
GO:0004540~ribonuclease activity	2	RNASEL,HELZ2	94	15	12270	17.4043	0.0352799
GO:0072570~ADP-D-ribose binding	1	PARP9	94	1	12270	130.532	0.0372159
GO:0019782~ISG15 activating enzyme activity	1	UBA7	94	1	12270	130.532	0.0372159
GO:0048030~disaccharide binding	1	LGALS9	94	1	12270	130.532	0.0372159
GO:0003692~left-handed Z-DNA binding	1	ZBP1	94	1	12270	130.532	0.0372159
GO:0046980~tapasin binding	1	TAP2	94	1	12270	130.532	0.0372159
GO:0032558~adenyl deoxyribonucleotide binding	1	TREX1	94	1	12270	130.532	0.0372159
GO:0003677~DNA binding	15	FMR1,IRF7,STAT1,DHX58,ZBP1,ADAR,OASL,IFIH1,TRIM21,SP110,HELZ2,PML,STAT2,TRIM26,SP100	94	993	12270	1.97178	0.0395501
GO:0003714~transcription corepressor activity	5	PARP14,PARP15,TRIM22,PARP9,PARP10	94	172	12270	3.79453	0.048494
Cellular component
GO:0005737~cytoplasm	63	DTX3L,ERAP2,LOC102889295 (DDX60),EHD4,TRIM14,MX2,ERAP1,MX1,RTP4,PARP15,MLKL,FMR1,NLRC5,IFIT3,IFIT2,STAT2,DHX58,ZBP1,ADAR,TREX1,OAS1,LOC102878285 (IFIT1),OAS3,OAS2,ISG15,HNRNPA2B1,PML,SAMD9,LOC102885856 (GBP1),LOC112484226 (APOBEC3ZBa),LOC102888261 (TRIM34),PARP9,HNRNPA3,TRIM26,IFI35,TDRD7,OASL,IFIH1,TRIM21,UBA7,LGALS9,HERC5,TRIM22,HELZ2,HERC6,LOC102893173,ZC3HAV1,SAMD9L,SRXN1,IRF7,STAT1,RPL38,IRF…	92	4298	12504	1.99221	2.7928e-09
GO:0005829~cytosol	63	DTX3L,PSMB8,LOC102889295 (DDX60),MOV10,TRIM14,PSMB10,MX2,ERAP1,MX1,UBE2L6,B2M,MLKL,FMR1,NLRC5,IFIT3,IFIT2,STAT2,STAT1,LOC102878285 (IFIT1),ZBP1,CALCOCO2,TREX1,OAS1,LOC102882275 (GBP6),OAS3,OAS2,ISG15,ZC3HAV1,TRIM25,PML,RNASEL,LOC102885856 (GBP1),LOC102888630,LOC102888261 (TRIM34),PARP9,NUB1,LOC102895293 (NME1),TRIM26,IFI35,OASL,IFIH1,TRIM21,UBA7,LGALS9,HERC5,TRIM22,HELZ2,HERC6,USP18,XAF1,IRF7,LOC…	92	4540	12504	1.88602	2.3904e-08
GO:0042824~MHC class I peptide loading complex	4	TAPBP,TAP1,B2M,TAP2	92	8	12504	67.9565	7.19011e-06
GO:0070721~ISGF3 complex	3	IRF9,STAT2,STAT1	92	3	12504	135.913	1.3664e-05
GO:1990111~spermatoproteasome complex	3	PSMB8,PSMB9,PSMB10	92	4	12504	101.935	4.1938e-05
GO:0042825~TAP complex	2	TAP1,TAP2	92	2	12504	135.913	0.000829458
GO:0019774~proteasome core complex, beta-subunit complex	3	PSMB8,PSMB9,PSMB10	92	11	12504	37.0672	0.000857697
GO:0043186~P granule	3	TDRD7,MOV10,HELZ2	92	12	12504	33.9783	0.00105959
GO:1990462~omegasome	2	LOC102888261 (TRIM34), LOC102893173 (TRIM34L)	92	3	12504	90.6087	0.00188897
GO:0005839~proteasome core complex	3	PSMB8,PSMB9,PSMB10	92	19	12504	21.46	0.00336854
GO:0000932~P-body	5	LOC112484226 (APOBEC3ZBa),LOC102888261 (TRIM34),MOV10,TRIM21, LOC102893173 (TRIM34L)	92	89	12504	7.63556	0.00471839
GO:0030670~phagocytic vesicle membrane	4	TAPBP,TAP1,B2M,TAP2	92	60	12504	9.06087	0.00835986
GO:0005654~nucleoplasm	38	DTX3L,TRIM14,PSMB10,UBE2L6,FMR1,STAT2,STAT1,ADAR,OAS1,OAS3,OAS2,ISG15,HNRNPA2B1,TRIM25,SP110,LOC112484226 (APOBEC3ZBa),LOC102888261 (TRIM34),PARP9,NUB1,HNRNPA3,OASL,TRIM22,TRIM21,PML,HELZ2,HERC6,XAF1,IRF7, LOC102893173 (TRIM34L),UBA7,IRF9,LOC102893597,PSMB9,PSMB8,CMTR1,NMI,CMPK2,SP100	92	3474	12504	1.48667	0.0237185
GO:1990124~messenger ribonucleoprotein complex	2	FMR1,HNRNPA3	92	13	12504	20.9097	0.0263324
GO:0031901~early endosome membrane	5	PML,DTX3L,B2M,EHD4,LOC102888017 (IFITM3)	92	146	12504	4.65456	0.0288036
GO:0035770~ribonucleoprotein granule	2	HNRNPA3,TDRD7	92	15	12504	18.1217	0.0334826
GO:0005634~nucleus	45	DTX3L,IFIH1,EHD4,MOV10,PSMB10,MX2,MX1,UBE2L6,PARP15,MLKL,FMR1,NLRC5,STAT2,STAT1,ZBP1,ADAR,OAS1,LOC102882275 (GBP6),ISG15,HNRNPA2B1,SP110,ZC3HAV1,LOC112484226 (APOBEC3ZBa),PARP9,HNRNPA3,TRIM26,IFI35,TRIM21,TRIM22,PML,LGALS9,USP18,IRF7,UBA7,IRF9,EIF2AK2,PARP12,PARP10,PARP14,PSMB9,PSMB8,CMTR1,NMI,CALCOCO2,SP100	92	4452	12504	1.37378	0.0356151
GO:0033291~eukaryotic 80S initiation complex	1	RPL38	92	1	12504	135.913	0.0372159
GO:0015030~Cajal body	3	FMR1,HNRNPA2B1,TRIM22	92	51	12504	7.99488	0.0372159
GO:0000502~proteasome complex	3	PSMB8,PSMB9,PSMB10	92	57	12504	7.15332	0.0405171

## Sheet: Table S5 (Efk3b) 
GO Terms	Count	E. fuscus genes	List Total	Pop Hits	Pop Total	Fold Enrichment	Adjpval
Biological process
GO:0051607~defense response to virus	28	DTX3L,IFIH1,LOC103303469 (TRIM22),MX2,MX1,LOC103303442 (TRIM22),MLKL,IFIT3,IFIT2,DHX58,ADAR,LOC103290898 (DDX60),RSAD2,IFI44L,OAS3,OAS2,ISG15,RNASEL,PARP9,LOC103296399 (IFIT1),LOC103293910 (OAS1L),IRF7,STAT1,IFI6,IRF9,EIF2AK2,LOC103300075 (IFIT1),ZNFX1	54	168	12394	38.2531	3.47015e-36
GO:0045087~innate immune response	26	DTX3L,IFIH1,LOC103303469 (TRIM22),MX2,MX1,LOC103303442 (TRIM22),IFIT3,RSAD2,DHX58,ADAR,LOC129148584 (PARP14L),LOC129148585 (PARP14L),IFIT2,OAS3,OAS2,SAMD9,PARP9,TRIM25,TRIM21,LOC103293910 (OAS1L),IRF7,IFI6,ZNFX1,EIF2AK2,LOC114229658 (PARP14L),NMI	54	346	12394	17.2471	3.67623e-24
GO:0009615~response to virus	18	RSAD2,IFIH1,IRF7,DHX58,LOC103303469 (TRIM22),ADAR,EIF2AK2,MX2,LOC103303442 (TRIM22),MX1,OAS3,OAS2,ISG15,LOC103293910 (OAS1L),IFI44,IFIT3,IFIT2,NMI	54	89	12394	46.4195	5.67466e-24
GO:0045071~negative regulation of viral genome replication	11	IFIH1,ZNFX1,EIF2AK2,RNASEL,PARP10,MX1,OAS3,OAS2,ISG15,LOC103293910 (OAS1L),RSAD2	54	39	12394	64.736	7.18678e-16
GO:0032728~positive regulation of interferon-beta production	7	IFIH1,IRF7,DHX58,OAS3,OAS2,ISG15,LOC103293910 (OAS1L)	54	38	12394	42.2797	1.94688e-08
GO:0060337~type I interferon signaling pathway	6	IRF7,LOC103303198 (SP140L),STAT1,IRF9,OAS2,LOC103293910 (OAS1L)	54	33	12394	41.7306	2.69375e-07
GO:0060339~negative regulation of type I interferon-mediated signaling pathway	5	LOC103293910 (OAS1L),OAS3,USP18,ISG15,ADAR	54	17	12394	67.5054	3.6374e-07
GO:0070106~interleukin-27-mediated signaling pathway	4	LOC103293910 (OAS1L),OAS2,STAT1,MX1	54	7	12394	131.153	4.44477e-07
GO:0060333~interferon-gamma-mediated signaling pathway	5	IRF9,IRF7,STAT1,LOC103303198 (SP140L),NMI	54	18	12394	63.7551	4.44477e-07
GO:0006471~protein ADP-ribosylation	5	PARP9,LOC129148585 (PARP14L),LOC114229658 (PARP14L),PARP10,LOC129148584 (PARP14L)	54	24	12394	47.8164	1.79036e-06
GO:1902216~positive regulation of interleukin-4-mediated signaling pathway	3	LOC129148584 (PARP14L),LOC114229658 (PARP14L),LOC129148585 (PARP14L)	54	3	12394	229.519	2.38245e-06
GO:0070212~protein poly-ADP-ribosylation	4	LOC129148585 (PARP14L),LOC114229658 (PARP14L),PARP10,LOC129148584 (PARP14L)	54	11	12394	83.4613	2.98779e-06
GO:0039530~MDA-5 signaling pathway	3	OAS3,IRF7,IFIH1	54	4	12394	172.139	7.6933e-06
GO:0046596~regulation of viral entry into host cell	4	TRIM25,LOC103303442 (TRIM22),TRIM21,LOC103303469 (TRIM22)	54	14	12394	65.5767	7.6933e-06
GO:0060700~regulation of ribonuclease activity	3	LOC103293910 (OAS1L),OAS3,OAS2	54	5	12394	137.711	1.75009e-05
GO:0042742~defense response to bacterium	6	ZNFX1,OAS3,OAS2,ISG15,LOC103293910 (OAS1L),RNF213	54	74	12394	18.6096	1.75009e-05
GO:0035457~cellular response to interferon-alpha	3	LOC103293910 (OAS1L),IFIT3,IFIT2	54	9	12394	76.5062	0.000133585
GO:0060336~negative regulation of interferon-gamma-mediated signaling pathway	3	LOC129148584 (PARP14L),LOC114229658 (PARP14L),LOC129148585 (PARP14L)	54	9	12394	76.5062	0.000133585
GO:0034340~response to type I interferon	3	ISG15,LOC103303198 (SP140L),MX1	54	10	12394	68.8556	0.000182931
GO:0006511~ubiquitin-dependent protein catabolic process	8	DTX3L,TRIM25,LOC103286718 (SKP1),LOC129149958 (SKP1),HERC6,USP18,ATXN3,RNF213	54	246	12394	7.46402	0.000195013
GO:0071659~negative regulation of IP-10 production	2	LOC103293910 (OAS1L),OAS3	54	2	12394	229.519	0.000311351
GO:0071357~cellular response to type I interferon	2	LOC103300075 (IFIT1),LOC103296399 (IFIT1)	54	2	12394	229.519	0.000311351
GO:0035455~response to interferon-alpha	3	ADAR,EIF2AK2,MX2	54	13	12394	52.9658	0.000350971
GO:0042532~negative regulation of tyrosine phosphorylation of STAT protein	3	LOC129148584 (PARP14L),LOC114229658 (PARP14L),LOC129148585 (PARP14L)	54	14	12394	49.1825	0.000431819
GO:0098586~cellular response to virus	4	LOC103293910,IFI6,ADAR,IFIH1	54	42	12394	21.8589	0.000485409
GO:0042531~positive regulation of tyrosine phosphorylation of STAT protein	4	PARP9,LOC129148584 (PARP14L),LOC114229658 (PARP14L),LOC129148585 (PARP14L)	54	44	12394	20.8653	0.000552433
GO:0006513~protein monoubiquitination	4	LOC103286718 (SKP1),TRIM25,TRIM21,LOC129149958 (SKP1)	54	44	12394	20.8653	0.000552433
GO:0071360~cellular response to exogenous dsRNA	3	LOC103300075 (IFIT1),IFIH1,LOC103296399 (IFIT1)	54	16	12394	43.0347	0.000587863
GO:0051091~positive regulation of sequence-specific DNA binding transcription factor activity	5	TRIM25,LOC103303442 (TRIM22),TRIM21,LOC103303198 (SP140L),LOC103303469 (TRIM22)	54	90	12394	12.751	0.000587863
GO:0045824~negative regulation of innate immune response	3	TRIM21,DHX58,NMI	54	17	12394	40.5033	0.000676297
GO:0016567~protein ubiquitination	9	DTX3L,LOC103286718 (SKP1),LOC103303469 (TRIM22),TRIM21,LOC103295417 (FBXO6),LOC103303442 (TRIM22),LOC129149958 (SKP1),HERC6,RNF213	54	423	12394	4.88337	0.000944826
GO:0032727~positive regulation of interferon-alpha production	3	IFIH1,IRF7,STAT1	54	20	12394	34.4278	0.000995694
GO:0002230~positive regulation of defense response to virus by host	3	DTX3L,PARP9,STAT1	54	22	12394	31.298	0.00123778
GO:2000342~negative regulation of chemokine (C-X-C motif) ligand 2 production	2	LOC103293910,OAS3	54	4	12394	114.759	0.00123778
GO:0009617~response to bacterium	4	USP18,IFI44,DHX58,HERC6	54	58	12394	15.8289	0.00123778
GO:0032760~positive regulation of tumor necrosis factor production	4	LOC103293910,OAS3,OAS2,IFIH1	54	64	12394	14.3449	0.00174547
GO:0032880~regulation of protein localization	4	TRIM25,LOC103303442 (TRIM22),TRIM21,LOC103303469 (TRIM22)	54	67	12394	13.7026	0.00200449
GO:0051092~positive regulation of NF-kappaB transcription factor activity	5	TRIM25,LOC103303442 (TRIM22),EIF2AK2,TRIM21,LOC103303469 (TRIM22)	54	125	12394	9.18074	0.00200449
GO:0070936~protein K48-linked ubiquitination	4	LOC103286718 (SKP1),DTX3L,LOC129149958 (SKP1),NMI	54	68	12394	13.5011	0.00200782
GO:0034341~response to interferon-gamma	3	STAT1,LOC103303198 (SP140L),TRIM21	54	27	12394	25.5021	0.00200782
GO:0002753~cytoplasmic pattern recognition receptor signaling pathway	2	IFIH1,DHX58	54	6	12394	76.5062	0.00251167
GO:0010629~negative regulation of gene expression	6	PARP9,PARP10,LOC129148585 (PARP14L),LOC129148584 (PARP14L),LOC114229658 (PARP14L),SETDB2	54	218	12394	6.31702	0.00315245
GO:0071639~positive regulation of monocyte chemotactic protein-1 production	2	LOC103293910 (OAS1L),OAS3	54	7	12394	65.5767	0.00324907
GO:0002376~immune system process	3	IRF9,IRF7,RNF213	54	33	12394	20.8653	0.00324907
GO:0000077~DNA damage checkpoint	3	LOC103295417 (FBXO6),DTX3L,PARP9	54	33	12394	20.8653	0.00324907
GO:0034356~NAD biosynthesis via nicotinamide riboside salvage pathway	2	PARP9,PARP10	54	8	12394	57.3796	0.00415236
GO:0034058~endosomal vesicle fusion	2	ANKFY1,SAMD9	54	9	12394	51.0041	0.00516251
GO:0050688~regulation of defense response to virus	2	LOC103300075 (IFIT1),LOC103296399 (IFIT1)	54	9	12394	51.0041	0.00516251
GO:0045892~negative regulation of transcription, DNA-templated	8	LOC103303198 (SP140L),LOC103303469 (TRIM22),PARP10,LOC129148585 (PARP14L),LOC103303442 (TRIM22),LOC129148584 (PARP14L),LOC114229658 (PARP14L),SETDB2	54	461	12394	3.98297	0.00615767
GO:0045893~positive regulation of transcription, DNA-templated	9	DTX3L,IRF7,PARP9,STAT1,LOC103303469 (TRIM22),TRIM25,TRIM21,LOC103303442 (TRIM22),LOC103303198 (SP140L)	54	595	12394	3.47171	0.0074444
GO:0006952~defense response	3	MX2,STAT1,MX1	54	46	12394	14.9686	0.00780433
GO:0000209~protein polyubiquitination	5	LOC103286718 (SKP1),LOC103303442 (TRIM22),TRIM21,LOC129149958 (SKP1),LOC103303469 (TRIM22)	54	182	12394	6.30545	0.00832913
GO:0006955~immune response	5	IFI6,IFI44L,LOC103303442 (TRIM22),IFI44,LOC103303469 (TRIM22)	54	183	12394	6.271	0.0084165
GO:0070213~protein auto-ADP-ribosylation	2	PARP12,PARP10	54	13	12394	35.3105	0.00924092
GO:1904668~positive regulation of ubiquitin protein ligase activity	2	LOC103286718 (SKP1),LOC129149958 (SKP1)	54	13	12394	35.3105	0.00924092
GO:0032479~regulation of type I interferon production	2	IRF7,TRIM21	54	13	12394	35.3105	0.00924092
GO:0035456~response to interferon-beta	2	XAF1,STAT1	54	13	12394	35.3105	0.00924092
GO:0035458~cellular response to interferon-beta	2	LOC103293910 (OAS1L),STAT1	54	13	12394	35.3105	0.00924092
GO:0032897~negative regulation of viral transcription	2	TRIM21,LOC103303198 (SP140L)	54	13	12394	35.3105	0.00924092
GO:0044790~negative regulation by host of viral release from host cell	2	TRIM25,TRIM21	54	14	12394	32.7884	0.0104856
GO:0051457~maintenance of protein location in nucleus	2	LOC103286718 (SKP1),LOC129149958 (SKP1)	54	14	12394	32.7884	0.0104856
GO:0034142~toll-like receptor 4 signaling pathway	2	LOC103293910 (OAS1L),NMI	54	15	12394	30.6025	0.0119179
GO:0035563~positive regulation of chromatin binding	2	DTX3L,PARP9	54	16	12394	28.6898	0.0132591
GO:0031146~SCF-dependent proteasomal ubiquitin-dependent protein catabolic process	3	LOC103295417 (FBXO6),LOC103286718 (SKP1),LOC129149958 (SKP1)	54	64	12394	10.7587	0.0157144
GO:0035518~histone H2A monoubiquitination	2	LOC103286718 (SKP1),LOC129149958 (SKP1)	54	19	12394	24.1598	0.0174876
GO:0051865~protein autoubiquitination	3	DTX3L,TRIM21,RNF213	54	69	12394	9.97907	0.0190334
GO:2001034~positive regulation of double-strand break repair via nonhomologous end joining	2	DTX3L,PARP9	54	21	12394	21.8589	0.0208924
GO:0010508~positive regulation of autophagy	3	LOC103303442 (TRIM22),TRIM21,LOC103303469 (TRIM22)	54	72	12394	9.56327	0.021006
GO:0045655~regulation of monocyte differentiation	1	IRF7	54	1	12394	229.519	0.0211895
GO:0002566~somatic diversification of immune receptors via somatic mutation	1	ADAR	54	1	12394	229.519	0.0211895
GO:0039528~cytoplasmic pattern recognition receptor signaling pathway in response to virus	1	IFIH1	54	1	12394	229.519	0.0211895
GO:1900369~negative regulation of RNA interference	1	ADAR	54	1	12394	229.519	0.0211895
GO:1900225~regulation of NLRP3 inflammasome complex assembly	1	EIF2AK2	54	1	12394	229.519	0.0211895
GO:0035395~negative regulation of chemokine (C-X-C motif) ligand 9 production	1	OAS3	54	1	12394	229.519	0.0211895
GO:1903487~regulation of lactation	1	OAS2	54	1	12394	229.519	0.0211895
GO:0072308~negative regulation of metanephric nephron tubule epithelial cell differentiation	1	STAT1	54	1	12394	229.519	0.0211895
GO:0034127~regulation of MyD88-independent toll-like receptor signaling pathway	1	IRF7	54	1	12394	229.519	0.0211895
GO:0060330~regulation of response to interferon-gamma	1	PARP9	54	1	12394	229.519	0.0211895
GO:0034344~regulation of type III interferon production	1	IFIH1	54	1	12394	229.519	0.0211895
GO:0045648~positive regulation of erythrocyte differentiation	2	ISG15,STAT1	54	24	12394	19.1265	0.023196
GO:0043123~positive regulation of I-kappaB kinase/NF-kappaB signaling	4	TRIM25,LOC103303442 (TRIM22),TRIM21,LOC103303469 (TRIM22)	54	171	12394	5.36885	0.0301984
GO:0032461~positive regulation of protein oligomerization	1	ISG15	54	2	12394	114.759	0.0317193
GO:0090086~negative regulation of protein deubiquitination	1	TRIM21	54	2	12394	114.759	0.0317193
GO:0097528~execution phase of necroptosis	1	MLKL	54	2	12394	114.759	0.0317193
GO:0010810~regulation of cell-substrate adhesion	1	ATXN3	54	2	12394	114.759	0.0317193
GO:0045185~maintenance of protein location	1	LOC103303198 (SP140L)	54	2	12394	114.759	0.0317193
GO:0006233~dTDP biosynthetic process	1	CMPK2	54	2	12394	114.759	0.0317193
GO:0010468~regulation of gene expression	4	LOC103303442 (TRIM22),LOC103303469 (TRIM22),RNASEL,TRIM21	54	180	12394	5.10041	0.0317193
GO:0019082~viral protein processing	2	PARP9,PARP10	54	29	12394	15.8289	0.0317193
GO:1900182~positive regulation of protein localization to nucleus	2	DTX3L,PARP9	54	30	12394	15.3012	0.0317193
GO:0046725~negative regulation by virus of viral protein levels in host cell	1	STAT1	54	2	12394	114.759	0.0317193
GO:0006139~nucleobase-containing compound metabolic process	2	OAS3,OAS2	54	30	12394	15.3012	0.0317193
GO:1900245~positive regulation of MDA-5 signaling pathway	1	DHX58	54	2	12394	114.759	0.0317193
GO:0097309~cap1 mRNA methylation	1	CMTR1	54	2	12394	114.759	0.0317193
GO:0006227~dUDP biosynthetic process	1	CMPK2	54	2	12394	114.759	0.0317193
GO:1902044~regulation of Fas signaling pathway	1	LOC103303198 (SP140L)	54	2	12394	114.759	0.0317193
GO:0003340~negative regulation of mesenchymal to epithelial transition involved in metanephros morphogenesis	1	STAT1	54	2	12394	114.759	0.0317193
GO:1904379~protein localization to cytosolic proteasome complex involved in ERAD pathway	1	ATXN3	54	2	12394	114.759	0.0317193
GO:0007259~JAK-STAT cascade	2	STAT1,NMI	54	32	12394	14.3449	0.0317193
GO:0019043~establishment of viral latency	1	IRF7	54	2	12394	114.759	0.0317193
GO:0034124~regulation of MyD88-dependent toll-like receptor signaling pathway	1	IRF7	54	2	12394	114.759	0.0317193
GO:0035710~CD4-positive, alpha-beta T cell activation	1	RSAD2	54	2	12394	114.759	0.0317193
GO:0034157~positive regulation of toll-like receptor 7 signaling pathway	1	RSAD2	54	3	12394	76.5062	0.0418744
GO:0071650~negative regulation of chemokine (C-C motif) ligand 5 production	1	OAS3	54	3	12394	76.5062	0.0418744
GO:0016553~base conversion or substitution editing	1	ADAR	54	3	12394	76.5062	0.0418744
GO:0072136~metanephric mesenchymal cell proliferation involved in metanephros development	1	STAT1	54	3	12394	76.5062	0.0418744
GO:0072162~metanephric mesenchymal cell differentiation	1	STAT1	54	3	12394	76.5062	0.0418744
GO:1902033~regulation of hematopoietic stem cell proliferation	1	EIF2AK2	54	3	12394	76.5062	0.0418744
GO:0061326~renal tubule development	1	STAT1	54	3	12394	76.5062	0.0418744
GO:1900045~negative regulation of protein K63-linked ubiquitination	1	PARP10	54	3	12394	76.5062	0.0418744
GO:0031048~chromatin silencing by small RNA	1	ZNFX1	54	3	12394	76.5062	0.0418744
GO:0032687~negative regulation of interferon-alpha production	1	NMI	54	3	12394	76.5062	0.0418744
GO:0010847~regulation of chromatin assembly	1	PARP10	54	3	12394	76.5062	0.0418744
9E.	1	NMI	54	3	12394	76.5062	0.0418744
Molecular function
GO:0003725~double-stranded RNA binding	8	IFIH1,DHX58,ADAR,EIF2AK2,LOC103290898 (DDX60),OAS3,OAS2,LOC103293910 (OAS1L)	55	64	12727	28.925	1.94688e-08
GO:1990404~protein ADP-ribosylase activity	6	PARP9,PARP12,PARP10,LOC129148585 (PARP14L),LOC129148584 (PARP14L),LOC114229658 (PARP14L)	55	21	12727	66.1143	1.94688e-08
GO:0003950~NAD+ ADP-ribosyltransferase activity	6	PARP9,PARP12,PARP10,LOC129148585 (PARP14L),LOC129148584 (PARP14L),LOC114229658 (PARP14L)	55	27	12727	51.4222	8.79259e-08
GO:0016779~nucleotidyltransferase activity	6	PARP9,PARP12,PARP10,LOC129148585 (PARP14L),LOC129148584 (PARP14L),LOC114229658 (PARP14L)	55	50	12727	27.768	2.18721e-06
GO:0001730~2'-5'-oligoadenylate synthetase activity	3	LOC103293910 (OAS1L),OAS3,OAS2	55	4	12727	173.55	7.6933e-06
GO:0003714~transcription corepressor activity	7	PARP9,LOC103303469 (TRIM22),PARP10,LOC129148585 (PARP14L),LOC103303442 (TRIM22),LOC129148584 (PARP14L),LOC114229658 (PARP14L)	55	182	12727	8.9	0.000229213
GO:0061630~ubiquitin protein ligase activity	8	DTX3L,LOC103303469 (TRIM22),TRIM25,TRIM21,LOC103295417 (FBXO6),LOC103303442 (TRIM22),HERC6,RNF213	55	265	12727	6.98566	0.000296293
GO:0070403~NAD+ binding	3	LOC129148584 (PARP14L),LOC114229658 (PARP14L),LOC129148585 (PARP14L)	55	18	12727	38.5667	0.000751995
GO:0044389~ubiquitin-like protein ligase binding	3	DTX3L,PARP9,STAT1	55	19	12727	36.5368	0.000869066
GO:1990444~F-box domain binding	2	LOC103286718 (SKP1),LOC129149958 (SKP1)	55	4	12727	115.7	0.00123778
GO:0003724~RNA helicase activity	4	IFIH1,LOC103290898 (DDX60),HELZ2,DHX58	55	63	12727	14.6921	0.00162683
GO:0097677~STAT family protein binding	2	DTX3L,PARP9	55	7	12727	66.1143	0.00324907
GO:0003727~single-stranded RNA binding	3	IFIH1,LOC103290898 (DDX60),DHX58	55	34	12727	20.4176	0.00341742
GO:0004540~ribonuclease activity	2	RNASEL,HELZ2	55	13	12727	35.6	0.00924092
GO:0003723~RNA binding	14	ZNFX1,IFIH1,PARP12,ADAR,EIF2AK2,LOC103290898 (DDX60),TRIM21,RNASEL,LOC103296399 (IFIT1),HELZ2,TRIM25,LOC103300075 (IFIT1),IFIT3,IFIT2	55	1395	12727	2.32229	0.0121425
GO:0003677~DNA binding	11	IFIH1,STAT1,IRF7,DHX58,LOC103303198 (SP140L),ADAR,TRIM21,HELZ2,SP110,HES4,SETDB2	55	959	12727	2.65422	0.0141505
GO:0019899~enzyme binding	6	DTX3L,PARP9,STAT1,LOC129148584 (PARP14L),LOC129148585 (PARP14L),LOC114229658 (PARP14L)	55	317	12727	4.37981	0.0142465
GO:0004842~ubiquitin-protein transferase activity	5	DTX3L,TRIM25,TRIM21,RNF213,HERC6	55	222	12727	5.21171	0.0155593
GO:0072570~ADP-D-ribose binding	1	PARP9	55	1	12727	231.4	0.0211895
GO:0097602~cullin family protein binding	2	LOC103286718 (SKP1),LOC129149958 (SKP1)	55	23	12727	20.1217	0.0211895
GO:0042802~identical protein binding	13	IFIH1,STAT1,LOC103303198 (SP140L),LOC103303469 (TRIM22),EIF2AK2,RNASEL,TRIM21,MX1,LOC103303442 (TRIM22),MLKL,IFIT3,ATXN3,NMI	55	1386	12727	2.17042	0.0249179
GO:0008270~zinc ion binding	8	XAF1,DHX58,LOC103303469 (TRIM22),ZNFX1,TRIM21,IFIH1,LOC103303442 (TRIM22),SETDB2	55	640	12727	2.8925	0.0276981
GO:0009041~uridylate kinase activity	1	CMPK2	55	2	12727	115.7	0.0317193
GO:0036430~CMP kinase activity	1	CMPK2	55	2	12727	115.7	0.0317193
GO:0004857~enzyme inhibitor activity	2	DTX3L,PARP9	55	29	12727	15.9586	0.0317193
GO:0019785~ISG15-specific protease activity	1	USP18	55	2	12727	115.7	0.0317193
GO:0005524~ATP binding	12	IFIH1,MLKL,DHX58,CMPK2,EIF2AK2,LOC103290898 (DDX60),OAS3,OAS2,HELZ2,LOC103293910 (OAS1L),RNASEL,RNF213	55	1289	12727	2.15423	0.0317193
GO:0004798~thymidylate kinase activity	1	CMPK2	55	2	12727	115.7	0.0317193
GO:0033862~UMP kinase activity	1	CMPK2	55	2	12727	115.7	0.0317193
GO:0004483~mRNA (nucleoside-2'-O-)-methyltransferase activity	1	CMTR1	55	2	12727	115.7	0.0317193
GO:0036431~dCMP kinase activity	1	CMPK2	55	2	12727	115.7	0.0317193
GO:0043021~ribonucleoprotein complex binding	2	IFIH1,RNASEL	55	34	12727	13.6118	0.0338689
GO:1990756~protein binding, bridging involved in substrate recognition for ubiquitination	2	LOC103286718 (SKP1),LOC129149958 (SKP1)	55	34	12727	13.6118	0.0338689
GO:0039552~RIG-I binding	1	TRIM25	55	3	12727	77.1333	0.0418744
GO:0003726~double-stranded RNA adenosine deaminase activity	1	ADAR	55	3	12727	77.1333	0.0418744
GO:0008251~tRNA-specific adenosine deaminase activity	1	ADAR	55	3	12727	77.1333	0.0418744
GO:0046872~metal ion binding	15	DTX3L,DHX58,LOC103303198 (SP140L),TRIM25,ADAR,PARP12,RNASEL,RSAD2,SP110,OAS3,OAS2,HELZ2,LOC103293910 (OAS1L),ANKFY1,RNF213	55	1902	12727	1.82492	0.0418744
Cellular component
GO:0005737~cytoplasm	41	DTX3L,IFIH1,LOC103303469 (TRIM22),MX2,MX1,LOC103303442 (TRIM22),MLKL,IFIT3,IFIT2,IFI44L,DHX58,ADAR,LOC103290898 (DDX60),LOC129148584 (PARP14L),LOC129148585 (PARP14L),LOC103295417 (FBXO6),OAS3,OAS2,ISG15,LOC129149958 (SKP1),SAMD9,PARP9,LOC103303198 (SP140L),TRIM21,LOC103286718 (SKP1),HELZ2,HERC6,LOC103293910 (OAS1L),SAMD9L,IRF7,STAT1,IRF9,EIF2AK2,PARP10,ATXN3,LOC114229658 (PARP14L),CMTR1,IFI44,CMP…	55	4512	12970	2.14285	1.11334e-07
GO:0005829~cytosol	40	DTX3L,IFIH1,LOC103303469 (TRIM22),MX2,MX1,LOC103303442 (TRIM22),MLKL,IFIT3,IFIT2,STAT1,LOC129148584 (PARP14L),LOC129148585 (PARP14L),LOC103295417 (FBXO6),OAS3,OAS2,ISG15,LOC129149958 (SKP1),TRIM25,RNASEL,SETDB2,PARP9,IRF9,TRIM21,LOC103286718 (SKP1),LOC103296399 (IFIT1),HELZ2,HERC6,LOC103293910 (OAS1L),USP18,XAF1,IRF7,ANKFY1,EIF2AK2,PARP10,SAMD9,LOC114229658 (PARP14L),LOC103300075 (IFIT1),ATXN3,RN…	55	4672	12970	2.01899	1.16235e-06
GO:0070721~ISGF3 complex	2	IRF9,STAT1	55	3	12970	157.212	0.000684094
GO:0031467~Cul7-RING ubiquitin ligase complex	2	LOC103286718 (SKP1),LOC129149958 (SKP1)	55	5	12970	94.3273	0.00177875
GO:0005634~nucleus	32	DTX3L,ZNFX1,IFIH1,LOC103303469 (TRIM22),MX2,MX1,LOC103303442 (TRIM22),MLKL,STAT1,ADAR,LOC129148584 (PARP14L),LOC129148585 (PARP14L),ISG15,LOC129149958 (SKP1),SP110,SETDB2,PARP9,LOC103303198 (SP140L),TRIM21,LOC103286718 (SKP1),LOC103293910 (OAS1L),USP18,IRF7,IRF9,EIF2AK2,PARP12,PARP10,LOC114229658 (PARP14L),CMTR1,HES4,ATXN3,NMI	55	4458	12970	1.69273	0.00231412
GO:0005654~nucleoplasm	26	DTX3L,LOC103303469 (TRIM22),LOC103303442 (TRIM22),STAT1,ADAR,OAS3,OAS2,ISG15,LOC129149958 (SKP1),SP110,SETDB2,PARP9,LOC103303198 (SP140L),TRIM25,TRIM21,LOC103286718,HELZ2,HERC6,LOC103293910 (OAS1L),XAF1,IRF7,IRF9,ATXN3,CMTR1,CMPK2,NMI	55	3528	12970	1.73789	0.00832913
GO:0019005~SCF ubiquitin ligase complex	3	LOC103295417 (FBXO6),LOC103286718 (SKP1),LOC129149958 (SKP1)	55	63	12970	11.2294	0.014252
GO:0031519~PcG protein complex	2	LOC103286718 (SKP1),LOC129149958 (SKP1)	55	23	12970	20.5059	0.0211895
GO:0031380~nuclear RNA-directed RNA polymerase complex	1	ZNFX1	55	2	12970	117.909	0.0317193
GO:0044530~supraspliceosomal complex	1	ADAR	55	3	12970	78.6061	0.0418744

## Sheet: Table S6
agene	A549_mk1	A549_mk2	A549_mk3	A549_IFN1	A549_IFN2	A549_IFN3	rgene	RPTEC_mk1	RPTEC_mk2	RPTEC_mk3	RPTEC_IFN1	RPTEC_IFN2	RPTEC_IFN3	pgene	Pa_mk1	Pa_mk2	Pa_mk3	Pa_IFN1	Pa_IFN2	Pa_IFN3	egene	Ef_mk1	Ef_mk2	Ef_mk3	Ef_IFN1	Ef_IFN2	Ef_IFN3
A1BG	1.3565	1.42041	1.79096	1.65596	1.59834	1.42382	A1BG	1.98116	2.59134	2.34736	2.75044	2.4976	2.41803	A1BG	0.954587	1.30797	0.776932	0.926936	0.597049	0.940206	A1BG	2.23698	2.212	2.3329	1.843	1.75539	1.75853
A1BG-AS1	1.94921	1.93508	2.12201	1.744	1.98679	1.8804	A1BG-AS1	3.60544	4.45904	3.6246	3.29723	3.1173	3.36235
A1CF	0.394273	0.521092	0.386166	0.414761	0.423482	0.449336	A1CF	0.005184	0	0	0	0.005536	0	A1CF	0	0	0	0	0	0	A1CF	0	0	0.029026	0.03526	0	0
A2M	0	0.010356	0.011962	0.038525	0	0	A2M	0.01079	0	0	0	0	0	A2M	2.59767	2.30452	2.90079	2.91815	2.34199	2.79081	LOC103285401	0.205263	0.264591	0.191517	0.219844	0.19736	0.246467
A2M-AS1	0.773887	0.703604	0.783945	0.729966	0.81605	0.896105	A2M-AS1	0.131154	0.133051	0.133352	0.192121	0.093243	0.085926
A2ML1	0	0	0.043872	0	0.010503	0.034471	A2ML1	0.009876	0.009579	0.031964	0	0.021097	0	A2ML1	0	0	0	0	0	0	A2ML1	0	0	0.01063	0	0	0
A2MP1	0	0	0	0	0	0	A2MP1	0	0	0	0	0	0
A3GALT2	0	0	0	0	0	0	A3GALT2	0.108144	0	0	0.075324	0	0.151896	A3GALT2	0.67362	0.642179	0.534201	0.595909	0.627661	0.691592	A3GALT2	0	0	0.163049	0	0.141641	0.050876
A4GALT	17.7099	16.0978	16.7309	13.9469	18.5603	18.3622	A4GALT	106.916	101.638	109.07	106.792	104.659	104.886	A4GALT	12.2644	14.0118	13.6228	11.5485	13.6053	14.1316	A4GALT	36.7795	35.8983	36.3145	33.951	34.9347	34.582
A4GNT	0	0	0	0	0	0	A4GNT	0	0	0.033785	0	0	0	A4GNT	0.044549	0.038126	0.210457	0.147512	0.128848	0.223431	A4GNT	0	0.058716	0	0	0	0
AA06	0	0	0	0	0	0	AA06	0	0	0	0	0	0
AAAS	93.7534	90.6564	92.3604	89.9012	93.4741	91.9111	AAAS	40.2636	39.911	39.2067	43.6996	38.507	40.9858	AAAS	62.5657	63.4972	64.343	56.8084	65.479	62.3468	AAAS	16.7222	19.207	18.4469	18.9112	17.1122	16.0118
AACS	30.053	26.536	29.1279	26.6446	25.8189	29.1544	AACS	30.9507	29.7164	29.3429	29.881	29.026	28.3969	AACS	0.022198	0.018867	0.069738	0.073508	0.018345	0.08909	AACS	99.8942	93.5137	88.5401	82.3705	91.1273	86.8116
AACSP1	0.141193	0.139265	0.154846	0.062335	0.104798	0.081213	AACSP1	0	0	0.020329	0	0	0.016372
AADAC	9.66878	9.23739	8.51081	11.2444	11.1702	9.77985	AADAC	0	0.033286	0	0	0	0	AADAC	0.108829	0	0	0	0	0	LOC114231784	0.03893	0.03053	0.05349	0.048631	0.04561	0.025143
AADAC	9.66878	9.23739	8.51081	11.2444	11.1702	9.77985	AADAC	0	0.033286	0	0	0	0	AADAC	0.108829	0	0	0	0	0	LOC129148549	0	0	0.019277	0	0.03488	0
AADAC	9.66878	9.23739	8.51081	11.2444	11.1702	9.77985	AADAC	0	0.033286	0	0	0	0	AADAC	0.108829	0	0	0	0	0	LOC129148550	0	0	0	0	0	0
AADAC	9.66878	9.23739	8.51081	11.2444	11.1702	9.77985	AADAC	0	0.033286	0	0	0	0	AADAC	0.108829	0	0	0	0	0	LOC129148551	0	0	0	0	0	0
AADAC	9.66878	9.23739	8.51081	11.2444	11.1702	9.77985	AADAC	0	0.033286	0	0	0	0	AADACL2	0	0	0	0	0	0	LOC114231784	0.03893	0.03053	0.05349	0.048631	0.04561	0.025143
AADAC	9.66878	9.23739	8.51081	11.2444	11.1702	9.77985	AADAC	0	0.033286	0	0	0	0	AADACL2	0	0	0	0	0	0	LOC129148549	0	0	0.019277	0	0.03488	0
AADAC	9.66878	9.23739	8.51081	11.2444	11.1702	9.77985	AADAC	0	0.033286	0	0	0	0	AADACL2	0	0	0	0	0	0	LOC129148550	0	0	0	0	0	0
AADAC	9.66878	9.23739	8.51081	11.2444	11.1702	9.77985	AADAC	0	0.033286	0	0	0	0	AADACL2	0	0	0	0	0	0	LOC129148551	0	0	0	0	0	0
AADACL2	0	0	0	0	0	0	AADACL2	0.009444	0	0	0	0	0								AADACL2	0	0	0	0	0.104799	0
AADACL2-AS1	0	0.093899	0	0	0	0	AADACL2-AS1	0	0	0	0	0	0
AADACL3	0	0	0	0	0	0	AADACL3	0	0	0	0	0	0	LOC102880089	0	0.046901	0	0.05924	0	0.109275	AADACL3	0	0	0	0	0	0
AADACL4	0	0	0	0.040661	0	0	AADACL4	0	0	0	0	0	0
AADACP1	12.1649	11.1986	9.99264	11.7473	12.5214	11.3973	AADACP1	0	0	0	0	0	0
AADAT	7.79173	7.97523	8.41086	8.04682	8.59835	7.78825	AADAT	5.18743	5.38377	5.31004	4.72981	5.36013	4.56857	AADAT	0.13053	0.037009	0.09047	0.33045	0.106664	0.259895	AADAT	7.19834	6.76204	7.27389	7.14509	7.42769	7.20672
AAGAB	70.6472	68.2627	69.5876	69.7859	66.3588	67.2045	AAGAB	44.2947	47.8574	49.3861	46.6182	45.162	46.6917	AAGAB	38.777	38.4351	37.9565	37.482	39.7413	41.1544	AAGAB	79.2764	87.6561	88.1382	79.7753	85.3159	81.119
AAK1	6.60538	5.34413	5.8094	6.40794	5.86538	5.88758	AAK1	10.3431	9.74342	10.5789	9.09075	9.51233	8.63269	AAK1	12.3041	11.6176	11.7551	12.7381	12.7033	13.2339	AAK1	14.3259	13.7014	15.1808	13.3191	14.7545	17.5013
AAMDC	25.0248	26.9486	27.3926	34.2152	32.4566	27.776	AAMDC	27.9148	28.5715	27.0944	31.4829	28.4385	30.8845	AAMDC	11.6763	11.6455	9.52117	10.755	10.6822	10.7155	AAMDC	51.1242	57.0074	56.9656	55.2332	55.7257	54.6248
AAMP	101.628	105.754	104.661	97.5762	100.495	97.5193	AAMP	118.849	117.555	116.55	117.395	117.268	118.564	AAMP	134.146	142.402	142.578	141.474	142.74	143.454	AAMP	125.316	120.569	127.483	113.579	119.99	119.749
AANAT	0.157898	0.175145	0.193286	0.138269	0.15956	0	AANAT	0	0.05562	0	0	0	0.049698	AANAT	0	0	0	0	0	0	AANAT	0.402612	0.374866	0.490574	0.600198	0.532142	0.381596
AAR2	45.6538	44.5436	44.264	43.6854	39.9881	39.0133	AAR2	31.9682	33.3402	31.766	33.1674	30.4956	30.3258	AAR2	38.9863	42.4666	42.2728	43.0105	42.311	41.9775	AAR2	24.3529	27.0449	24.7131	24.2513	22.9896	24.9719
AARD	0.147128	0.092242	0.096818	0.035772	0.026227	0.076127	AARD	0.021766	0	0.035078	0.148099	0.104753	0.09364
AARS1	286.734	315.166	279.285	314.521	294.681	264.157	AARS1	111.461	107.286	103.017	110.337	119.377	107.404	AARS	169.048	166.319	175.942	180.547	182.432	178.144	AARS1	160.828	169.07	158.611	156.778	166.431	162.917
AARS2	8.69245	7.73484	7.87524	8.95886	7.93217	7.9834	AARS2	11.398	10.9311	10.7556	11.9446	10.2946	10.5718	AARS2	6.85759	7.11895	7.0778	7.58804	7.5919	7.39918	AARS2	5.05124	5.1269	5.27463	4.05383	4.96679	4.99789
AARSD1	44.7889	45.5835	43.8518	40.4216	45.2617	42.8532	AARSD1	34.6983	35.8142	35.9502	35.5966	35.5512	37.4912
AASDH	4.52979	4.83821	4.51468	4.90538	5.01013	4.3668	AASDH	7.5916	7.44118	6.85282	7.3396	7.83793	7.294	AASDH	8.21957	6.97106	5.8525	6.10587	7.3914	6.53493	AASDH	3.99581	3.94346	4.26367	3.58742	3.73091	3.82064
AASDH	4.52979	4.83821	4.51468	4.90538	5.01013	4.3668	AASDH	7.5916	7.44118	6.85282	7.3396	7.83793	7.294	LOC102893474	2.60656	3.33852	2.69183	3.00305	2.99413	2.1218	AASDH	3.99581	3.94346	4.26367	3.58742	3.73091	3.82064
AASDHPPT	39.2362	42.413	39.6517	34.8537	38.8132	37.3142	AASDHPPT	47.5607	48.0583	48.6084	46.1719	48.2862	45.4497	AASDHPPT	51.2572	51.5794	51.6201	50.3871	52.6177	51.4285	AASDHPPT	42.272	42.6325	44.0743	40.1192	41.5872	41.9613
AASS	0.111723	0.189534	0.109149	0.169815	0.167353	0.135362	AASS	4.82324	4.4456	5.34987	5.23989	5.57174	4.61462	AASS	152.545	141.653	154.872	147.325	157.821	156.484	AASS	7.84866	7.05952	7.93107	6.52884	7.94782	7.69955
AATBC	0	0	0	0	0	0	AATBC	0	0	0	0.014622	0	0
AATF	134.478	130.933	136.764	135.828	129.1	123.552	AATF	75.5949	77.3203	81.7289	78.3199	81.4019	77.5294	AATF	70.2414	66.7351	71.2604	70.2542	69.4616	72.4003	AATF	33.7279	31.6216	33.4135	29.1585	34.6164	31.9996
AATK	0.14088	0.11291	0.155858	0.078086	0.062806	0.098057	AATK	0.093753	0.209154	0.14221	0.065703	0.170121	0.070465	AATK	2.29272	2.36951	1.95032	1.76862	1.81423	2.13718	AATK	10.918	9.88697	11.0754	9.54253	10.5885	10.8856
ABALON	0.108272	0.106766	0.236975	0.222598	0.160549	0.124355	ABALON	0.852452	1.31597	1.02441	0.559161	1.78936	1.1499
ABAT	0.598468	0.543645	0.479991	0.557911	0.626875	0.70502	ABAT	0.474236	0.670305	0.541492	0.798449	0.84166	0.745949	ABAT	0.404931	0.970333	0.460301	0.361398	0.633937	0.844901	ABAT	2.18084	2.69882	2.36171	1.93791	2.52024	2.53286
ABCA1	2.88964	3.0301	2.46765	4.06525	3.41545	3.45102	ABCA1	4.84087	4.50066	5.18241	4.66377	5.30383	4.29948	ABCA1	14.4697	12.786	12.5146	14.0749	14.1785	14.7588	ABCA1	4.86148	4.26851	4.26994	4.72788	4.99434	5.29854
ABCA10	0.10672	0.165559	0.113947	0.123323	0.123645	0.111033	ABCA10	0.015891	0.038372	0.111748	0.06701	0.085064	0.037269	ABCA10	0	0	0.024398	0	0.028939	0.011687	LOC103291129	0.134945	0.013921	0.145072	0.167729	0.019213	0.112613
ABCA10	0.10672	0.165559	0.113947	0.123323	0.123645	0.111033	ABCA10	0.015891	0.038372	0.111748	0.06701	0.085064	0.037269	ABCA10	0	0	0.024398	0	0.028939	0.011687	LOC114227989	0.167473	0.093944	0.042193	0.060173	0	0.092823
ABCA10	0.10672	0.165559	0.113947	0.123323	0.123645	0.111033	ABCA10	0.015891	0.038372	0.111748	0.06701	0.085064	0.037269	ABCA10	0	0	0.024398	0	0.028939	0.011687	LOC129147348	0.176588	0.258237	0.287526	0.304319	0.274005	0.286681
ABCA11P	2.98769	3.78842	4.30199	4.16092	3.22185	3.31499	ABCA11P	4.7014	5.05323	6.0094	4.34553	5.42882	4.86603
ABCA12	1.82631	1.61899	1.68903	1.9006	1.51552	1.65618	ABCA12	3.51649	3.51371	3.81052	2.84569	3.80897	2.87203	ABCA12	0	0	0	0	0	0	ABCA12	0.005155	0	0	0	0.006948	0
ABCA13	0	0.008426	0.009354	0.025877	0.010243	0.01579	ABCA13	0.226989	0.239842	0.205901	0.21091	0.287408	0.185352	ABCA13	0.253719	0.249387	0.239267	0.213322	0.211794	0.252862	ABCA13	1.00346	0.915772	0.957366	0.97578	0.871987	0.981488
ABCA17P	0.093143	0.068858	0.012762	0.027384	0.055173	0.040109	ABCA17P	0.034576	0.022319	0.067061	0.016125	0.036851	0.021614
ABCA2	12.8002	12.3216	11.6966	11.1894	12.5313	12.663	ABCA2	13.9106	12.5797	12.9387	12.14	12.7714	10.9707	ABCA2	24.9479	23.3183	23.8922	21.9905	23.2439	23.8568	ABCA2	15.157	13.5199	13.9989	14.2713	14.3301	15.4744
ABCA3	27.0735	25.8144	24.82	25.3391	23.0429	24.4704	ABCA3	38.3665	35.4006	36.736	36.2899	35.9716	33.3703	ABCA3	4.5138	4.30363	4.25347	4.17163	4.48399	4.07537	ABCA3	23.4905	22.9872	23.0666	21.9845	21.6573	23.2983
ABCA4	0.08054	0.086068	0.078617	0.102948	0.087792	0.139201	ABCA4	0.206478	0.188961	0.263585	0.171902	0.192885	0.206155	ABCA4	0.959459	0.91743	0.850768	0.76802	0.924953	0.571359	LOC103290201	0.189844	0.120213	0.217292	0.175443	0.15473	0.142478
ABCA4	0.08054	0.086068	0.078617	0.102948	0.087792	0.139201	ABCA4	0.206478	0.188961	0.263585	0.171902	0.192885	0.206155	ABCA4	0.959459	0.91743	0.850768	0.76802	0.924953	0.571359	LOC129150346	0.089596	0	0	0	0	0
ABCA5	1.56493	1.54168	1.92649	1.52601	1.83571	1.68229	ABCA5	1.17409	1.28243	1.30396	1.28235	1.32656	1.12044	ABCA5	2.20134	2.18075	2.35288	2.13347	2.19974	2.36706	ABCA5	12.6065	12.1919	12.899	11.8287	12.5971	13.3514
ABCA6	0	0	0	0	0	0	ABCA6	0.008966	0.026091	0.010462	0.012567	0	0.008424	ABCA6	0.112085	0.047592	0.082472	0.074903	0.055902	0.079013	LOC103299440	0.079767	0.053407	0.120984	0.058945	0.182223	0.245081
ABCA7	6.59445	5.62376	5.48158	5.23083	6.38118	6.96112	ABCA7	9.54633	8.34489	8.08967	8.72437	8.50615	8.12588	ABCA7	7.62684	7.59849	6.93195	6.05203	7.18592	7.22372	ABCA7	2.73713	2.58158	2.56121	2.51617	2.86989	2.87122
ABCA8	0.286032	0.267357	0.402496	0.213698	0.24477	0.192667	ABCA8	0	0	0	0	0	0	ABCA8	0	0	0.011112	0	0	0
ABCA9	0.027903	0.029601	0.033218	0.036809	0.068541	0	ABCA9	0.031119	0	0	0	0.035578	0	ABCA9	0.019605	0.04162	0.030927	0.065584	0.016309	0.039507	ABCA9	0	0	0.008208	0	0	0
ABCA9-AS1	0	0.135632	0.187545	0	0	0.323421	ABCA9-AS1	0	0	0	0	0.137603	0
ABCB1	6.30492	6.89016	6.58656	5.9571	6.12075	6.83156	ABCB1	12.6579	12.095	11.7853	12.2908	12.2717	11.7284	ABCB1	28.3775	25.7483	25.2331	28.0705	27.8019	28.927	ABCB1	1.91136	1.92586	1.94268	2.15495	1.82083	1.91904
ABCB10	21.0893	21.6701	20.525	19.2393	20.1252	18.7118	ABCB10	19.3327	19.1731	19.7465	18.666	19.3327	17.9857	ABCB10	34.6753	34.1885	31.6555	31.4494	32.0418	30.7456	ABCB10	8.69736	9.08818	8.10882	7.67869	8.06144	8.49809
ABCB11	0	0.027273	0.007608	0.01908	0.023063	0.020391	ABCB11	0	0	0	0	0	0	ABCB11	0	0	0	0	0	0	ABCB11	0	0.027656	0.012114	0.014683	0.047436	0.034176
ABCB4	0.048735	0.091447	0.124423	0.108577	0.072536	0.072833	ABCB4	0	0.005781	0.028018	0	0.012826	0.02255	LOC102880063	0.012452	0.010966	0.013528	0.014336	0.032121	0.012975	ABCB4	1.85651	1.99987	2.19387	1.77511	2.41833	2.54039
ABCB5	0.133616	0.087777	0.128586	0.039184	0.133647	0.140667	ABCB5	0.047716	0.070068	0	0.096871	0.128366	0.109291	ABCB5	0.314372	0.3594	0.355761	0.174945	0.54249	0.182592	ABCB5	0	0	0	0.030985	0	0
ABCB6	25.2314	27.7154	25.9846	21.5783	24.8102	25.5295	ABCB6	11.198	10.8362	9.64947	10.3539	10.6882	9.67431	ABCB6	44.6036	46.1987	47.4968	43.0978	47.0976	44.7202	ABCB6	27.1984	26.6756	23.7116	24.5482	22.3849	24.1211
ABCB7	12.3265	11.9455	12.4296	12.4909	12.8168	12.8867	ABCB7	7.84838	7.88232	7.23287	8.26375	7.55761	7.42181	ABCB7	43.2986	44.6072	41.8967	44.7185	42.0216	43.0696	ABCB7	31.909	31.183	32.3871	29.5799	33.8349	32.4514
ABCB8	26.2309	25.9268	24.6345	25.318	26.247	26.3727	ABCB8	18.7638	17.9441	17.6561	17.1759	17.0032	16.6652	ABCB8	38.9034	38.1981	41.7807	38.1978	38.5781	37.4212	ABCB8	124.83	127.57	126.509	117.108	127.262	125.048
ABCB9	5.26462	4.84374	4.41474	5.05776	5.11926	4.86934	ABCB9	7.87891	8.21117	8.02543	7.47706	7.5331	8.13285	ABCB9	4.86588	5.68147	4.85106	4.16578	4.75134	4.74009	ABCB9	11.552	12.1107	11.5078	10.6192	12.4421	12.4219
ABCC1	63.2874	64.2019	57.2186	74.6827	70.8512	71.1853	ABCC1	9.3796	10.2883	11.568	10.9577	10.1972	7.78861	ABCC1	55.0172	51.4467	52.3018	54.6481	53.8393	54.8014	ABCC1	14.8506	13.4873	14.6637	13.1739	15.8377	14.6916
ABCC1-2	80.7152	74.8705	72.4805	90.1249	83.7482	83.6423	ABCC1-2	19.4448	16.2917	15.1377	12.9564	15.778	15.3412
ABCC10	5.35858	5.189	5.20878	4.96274	6.86884	5.80825	ABCC10	12.038	11.97	10.7586	10.5165	10.7009	10.2365	ABCC10	1.07973	1.25845	1.22678	1.01538	1.28613	0.961072	ABCC10	3.49472	2.64576	3.57761	3.36855	3.48578	3.07205
ABCC11	0.049993	0.097741	0.060475	0.077948	0.11829	0.118761	ABCC11	0.049068	0.033165	0.029164	0.022913	0	0.007742	ABCC11	0	0.01914	0	0.049715	0.018612	0.022593	ABCC11	0	0	0	0	0.041	0.009846
ABCC12	0.084234	0	0.069239	0	0.049996	0.024766	ABCC12	0.13655	0.248905	0.245505	0.323717	0.187623	0.268433								ABCC12	0	0	0	0	0	0
ABCC13	0	0.017382	0	0.020747	0.020928	0.040545	ABCC13	0	0	0	0.024375	0	0
ABCC2	159.963	156.915	148.415	170.406	172.791	166.422	ABCC2	2.82832	2.36032	2.39607	2.68578	2.69391	2.18875	ABCC2	1.15848	0.803665	0.793411	0.884502	0.866792	0.980093	ABCC2	0.037311	0.032937	0.00962	0.011656	0.062787	0.045237
ABCC3	177.881	171.704	154.646	163.156	186.358	188.159	ABCC3	134.911	123.699	123.509	123.317	119.864	124.172	LOC102893708	0.266684	0.29413	0.290838	0.253302	0.221839	0.146776	ABCC3	45.7243	47.3603	44.7747	46.5964	48.8479	47.3596
ABCC3	177.881	171.704	154.646	163.156	186.358	188.159	ABCC3	134.911	123.699	123.509	123.317	119.864	124.172	LOC112473130	0	0.184993	0.057248	0.059421	0	0.123381	ABCC3	45.7243	47.3603	44.7747	46.5964	48.8479	47.3596
ABCC4	39.3857	37.6506	36.3556	37.4628	34.7667	37.0456	ABCC4	74.4579	72.9341	73.5404	72.0804	71.6248	70.0096	ABCC4	50.8356	45.7583	44.5296	41.7053	44.1208	46.6667	ABCC4	27.1458	27.9798	28.7884	26.201	28.1058	29.1533
ABCC5	7.4328	7.91904	7.20998	7.2378	6.9587	7.671	ABCC5	27.7641	23.7081	24.2103	26.0927	24.788	24.7983	ABCC5	13.0663	13.0822	12.8741	12.6027	12.7895	13.9648	LOC129148291	0.750069	1.49988	0.879636	1.0385	1.45471	1.63384
ABCC5	7.4328	7.91904	7.20998	7.2378	6.9587	7.671	ABCC5	27.7641	23.7081	24.2103	26.0927	24.788	24.7983	ABCC5	13.0663	13.0822	12.8741	12.6027	12.7895	13.9648	LOC129148560	57.5844	53.8682	61.2323	50.2	60.9704	61.0308
ABCC5-AS1	0	0	0	0	0	0	ABCC5-AS1	0	0.146768	0.176185	0	0	0.142324
ABCC6	4.35304	3.83832	4.5156	4.75106	3.17748	4.5382	ABCC6	2.52107	3.45786	2.06039	3.09304	3.92674	3.51715	ABCC6	0.07299	0	0.038349	0.013538	0.010107	0.012247	ABCC6	0	0	0.019829	0	0	0
ABCC6P1	0.041402	0.024012	0.023674	0	0.051118	0.104896	ABCC6P1	0.043441	0.055854	0.055649	0.037069	0	0.020545
ABCC6P2	1.55279	2.31618	1.83954	0.568129	2.45659	0.674384	ABCC6P2	0.486397	0.457715	0.438174	0	0.173677	0.623334
ABCC8	0.457477	0.333656	0.560241	0.531732	0.431427	0.598764	ABCC8	0	0	0	0	0	0	ABCC8	0	0	0	0	0.009559	0	ABCC8	0	0	0	0	0	0
ABCC9	0.106628	0.202609	0.085405	0.141087	0.220005	0.144061	ABCC9	0	0	0	0	0	0.016763	ABCC9	0	0	0	0.024151	0	0.010917	ABCC9	0.056747	0.0891	0.078087	0.094571	0.093447	0.036732
ABCD1	4.67684	4.9477	5.32573	6.14633	6.69639	7.43142	ABCD1	14.7327	13.8683	12.9266	15.1964	14.6688	13.99	ABCD1	22.6296	24.0884	25.009	22.9489	25.0154	23.2405	ABCD1	16.8498	16.86	15.386	16.204	16.3694	17.4344
ABCD2	0.025569	0.104827	0.018066	0.024263	0.025556	0.04913	ABCD2	0.014937	0.018434	0.021873	0	0.0348	0.030609	ABCD2	0.079117	0	0	0	0	0	ABCD2	0	0	0	0.023308	0.050138	0.036102
ABCD3	50.545	49.4963	51.5626	42.5969	49.3254	46.6056	ABCD3	40.0865	41.3085	43.8334	41.3135	40.222	40.3924	ABCD3	186.938	181.538	178.342	181.861	181.7	190.216	ABCD3	86.9286	87.4571	91.868	83.4192	90.5313	85.5467
ABCD4	14.9199	13.9772	12.8286	13.4631	14.0438	14.5133	ABCD4	38.0102	38.0112	39.9191	39.5474	36.6424	36.9045	ABCD4	20.9433	19.0712	19.5577	17.4181	20.2535	18.8507	ABCD4	8.99413	8.63573	9.75491	8.87147	8.77576	8.65333
ABCE1	69.8239	69.7678	67.3389	61.6542	65.9497	61.451	ABCE1	67.6503	67.8268	69.0689	65.7048	65.3648	63.6635	ABCE1	87.7656	82.9931	84.9327	82.3808	86.2459	85.3097	ABCE1	58.9793	56.5761	60.9201	55.2914	57.5013	57.4767
ABCF1	71.0629	66.6527	65.2007	66.9026	63.6772	66.0234	ABCF1	68.6664	66.7852	68.1691	66.496	63.499	65.8607	ABCF1	48.1574	48.0839	51.3596	51.0514	53.1895	51.3669	ABCF1	66.5418	66.8296	67.9047	61.2641	71.4366	70.213
ABCF1-DT	0.346638	0	0.139523	0	0	0	ABCF1-DT	0	0	0	0	0.130385	0.229509
ABCF2	34.8972	34.1435	36.5351	33.2501	32.7156	34.1426	ABCF2	21.3825	22.9054	22.1324	21.234	21.8446	20.7067	ABCF2	90.963	87.1625	93.4705	88.922	87.7983	87.5497	ABCF2	73.4695	75.9695	76.7527	67.5813	77.0536	73.4817
ABCF2-H2BK1	68.2791	61.4499	60.7366	66.5216	58.6218	56.5494	ABCF2-H2BK1	37.163	40.3838	39.2266	37.524	41.1183	39.3871
ABCF3	31.323	30.7073	33.2356	29.7974	30.7764	31.9849	ABCF3	43.3972	44.0741	43.1198	43.7672	44.081	42.9556	ABCF3	33.3626	33.9234	36.3975	34.6832	34.638	34.8333	ABCF3	10.4379	10.5617	11.1577	9.90348	10.3256	10.8272
ABCG1	15.3871	10.6766	14.6433	12.6078	8.38896	13.8411	ABCG1	0.03291	0.032516	0	0	0.03511	0	ABCG1	31.2352	29.293	30.3208	31.9265	30.2335	28.7035	ABCG1	0.571766	0.592615	0.689709	0.604073	0.702476	0.530531
ABCG2	34.1473	31.3704	33.3971	31.6082	30.3994	33.8064	ABCG2	0.314715	0.407741	0.314686	0.409979	0.487486	0.381378	ABCG2	29.7252	28.9523	29.2544	29.2093	28.619	31.3006	LOC103287978	17.3679	16.8771	17.6129	15.3304	16.9064	17.1227
ABCG2	34.1473	31.3704	33.3971	31.6082	30.3994	33.8064	ABCG2	0.314715	0.407741	0.314686	0.409979	0.487486	0.381378	LOC102890879	3.45817	3.38454	3.79733	3.39055	3.4746	3.54976	LOC103287978	17.3679	16.8771	17.6129	15.3304	16.9064	17.1227
ABCG4	0.242754	0.31589	0.225665	0.256631	0.304433	0.109308	ABCG4	0	0	0.015657	0.018804	0	0.012608	ABCG4	1.09639	0.908994	1.00091	0.886118	1.08391	0.669926	ABCG4	0.614889	0.632287	0.573456	0.383864	0.283821	0.631641
ABCG5	0	0	0	0	0	0	ABCG5	0	0	0	0	0	0	ABCG5	0	0	0	0	0.047778	0	ABCG5	0	0	0.0258	0.031328	0.033657	0.024224
ABCG8	0	0.043962	0.014625	0	0.008379	0.035924	ABCG8	0.037165	0.029106	0.037363	0.041118	0.03488	0.017155	ABCG8	0	0	0	0	0	0	ABCG8	0	0	0	0	0	0
ABHD1	1.51086	1.85131	1.24485	1.80156	1.71156	1.25368	ABHD1	0.244076	0.274698	0.056738	0.051548	0.039326	0	ABHD1	0.434932	0.468259	0.333233	0.350122	0.310386	0.609321	ABHD1	16.4519	19.4533	17.1665	18.8218	18.8687	19.6905
ABHD10	30.5302	27.7503	29.1312	25.0414	28.0373	25.3189	ABHD10	23.3021	22.2744	22.9737	22.4233	21.1521	20.158	ABHD10	32.3884	33.6258	31.0389	31.0555	32.2685	31.4375	ABHD10	23.5321	23.5455	25.6535	22.0213	25.4494	22.1125
ABHD11	13.1278	13.2153	14.1102	12.8857	13.7373	15.4821	ABHD11	103.412	107.008	111.164	112.667	107.421	111.851	ABHD11	52.6851	53.197	55.3179	53.4066	53.1211	53.6979	ABHD11	56.2223	53.3642	52.4613	53.4787	51.1043	52.0698
ABHD11-AS1	1.71642	1.74302	1.72154	1.65795	1.87867	2.17768	ABHD11-AS1	5.44039	6.23064	6.08819	5.40271	8.77724	6.60375
ABHD12	155.227	153.542	151.908	150.003	151.019	154.865	ABHD12	74.9373	74.6247	70.2118	71.9638	73.2063	74.553	ABHD12	44.5417	42.3668	42.3772	43.1243	41.7894	43.164	ABHD12	68.6986	71.4177	70.7845	64.6706	67.9905	67.4107
ABHD12B	14.6415	12.0332	13.9602	14.7475	12.5324	14.2896	ABHD12B	2.98636	3.13328	3.84815	3.54586	3.07183	3.3323	ABHD12B	0	0	0	0	0	0	ABHD12B	9.78434	8.37593	11.4703	7.78826	10.7511	9.64626
ABHD13	6.46227	7.04418	6.60274	7.06506	6.11667	6.55792	ABHD13	9.68921	9.52913	9.93336	9.77073	10.0837	9.66854	ABHD13	19.7591	17.3006	17.517	16.9609	17.7014	18.6879	ABHD13	41.8507	43.3906	43.4219	38.144	42.395	38.8344
ABHD14A	22.1466	18.7481	19.4643	18.8938	18.2376	18.9192	ABHD14A	25.3687	28.0556	26.3272	26.6873	21.9046	25.3455	ABHD14A	7.02726	9.60709	7.41928	7.56516	7.37789	7.61479	ABHD14A	32.075	32.2713	32.2636	33.1012	34.5898	31.5995
ABHD14A-ACY1	0.166988	0	0.161275	0	0	0.766847	ABHD14A-ACY1	0.415997	0.492719	0.188475	0	0.207262	0.143749	ACY1	45.5688	49.6008	40.2842	41.1709	40.1952	40.9744
ABHD14B	45.4048	44.0907	44.4916	44.7331	45.5756	44.8084	ABHD14B	53.271	55.5783	53.9637	57.6713	54.6908	50.2924	ABHD14B	22.3246	23.7843	21.256	20.1649	21.605	21.7382	ABHD14B	61.8764	61.2645	59.4629	57.6933	60.2732	57.2236
ABHD15	24.9735	24.5041	23.3904	21.7994	22.0269	23.4016	ABHD15	24.6728	24.0742	23.8881	23.7855	24.0452	24.2249	ABHD15	3.65399	3.76317	4.00652	3.77413	3.31712	3.42077	ABHD15	2.74019	2.52551	2.81594	2.84426	2.19714	2.5943
ABHD16A	19.9798	20.3479	20.7805	23.1644	23.5588	23.2424	ABHD16A	52.2358	50.5149	50.9997	53.2533	53.0763	52.3652	ABHD16A	37.7396	38.8684	35.636	37.959	37.9236	38.7179	ABHD16A	56.9396	56.4031	58.8085	50.1246	58.4562	58.4888
ABHD16B	0.047474	0.035114	0.038916	0	0	0.040853	ABHD16B	0.035039	0	0	0.097586	0	0	ABHD16B	0	0	0	0	0	0	ABHD16B	0	0.032874	0.028771	0.069899	0.037528	0.054009
ABHD17A	55.0482	54.2514	56.3985	50.1887	49.5957	52.0376	ABHD17A	84.6538	78.839	83.0769	80.2798	83.0224	80.08	ABHD17A	35.6743	39.4903	38.6857	36.3552	35.9299	35.8386	ABHD17A	169.804	165.681	153.794	155.464	155.293	149.313
ABHD17B	21.882	21.8236	22.449	20.7812	22.3074	20.9797	ABHD17B	15.1303	14.0477	15.1719	14.8438	13.5328	13.0486	ABHD17B	51.1745	52.1273	49.2132	47.2535	49.2133	52.324	ABHD17B	19.0489	18.147	20.8855	18.5921	19.6504	18.2836
ABHD17C	26.0861	24.2955	24.2502	20.0156	21.728	22.5438	ABHD17C	21.4295	22.0534	22.0416	21.4428	21.4069	20.2373								ABHD17C	34.5601	33.4319	34.4552	33.2063	33.0913	36.1178
ABHD18	4.96766	4.85134	4.69688	5.1725	5.15071	4.95872	ABHD18	7.37792	6.39392	6.79873	6.46886	6.63113	5.9116	ABHD18	12.4838	11.8059	12.2446	10.1136	12.0125	11.9602	ABHD18	22.0742	20.3206	23.9013	20.0891	22.305	21.5694
ABHD2	58.7872	52.9014	50.3496	51.4888	48.1808	49.9738	ABHD2	49.0078	48.8519	50.0947	46.5036	49.5049	43.2455	ABHD2	20.1753	19.1293	20.0781	19.9684	20.1035	20.1937	ABHD2	116.773	123.572	122.125	118.315	122.306	130.264
ABHD3	30.1145	28.433	27.7237	25.0007	29.4208	28.172	ABHD3	42.9681	43.2288	39.0748	41.8273	36.2191	39.3622	ABHD3	36.1986	34.3899	34.2231	31.9439	33.5224	35.3444	ABHD3	36.7633	34.1097	35.9583	30.1553	34.0107	33.8662
ABHD4	67.6068	64.3033	68.0775	64.3838	50.7058	55.455	ABHD4	39.3478	39.445	40.1852	39.0947	37.6421	37.655	ABHD4	103.839	105.225	92.6857	92.773	99.9846	97.3484	ABHD4	41.9566	47.1213	44.0074	42.3925	47.854	46.827
ABHD5	12.5096	13.0091	12.3906	12.6516	10.183	12.2485	ABHD5	42.3017	41.0976	40.3887	37.7859	41.4665	40.677	ABHD5	215.921	204.383	207.929	204.382	202.684	205.055	ABHD5	108.712	117.895	111.132	104.489	109.311	102.983
ABHD6	14.3562	13.2906	13.1813	12.4263	11.8692	13.5644	ABHD6	16.4444	15.7893	15.2516	16.3758	14.6442	14.8814	ABHD6	0.44304	0.202819	0.319901	0.149029	0.279874	0.340416	LOC103290396	53.9576	43.2611	50.5036	41.8737	51.0964	44.9261
ABHD8	14.3512	12.7882	13.5695	10.9758	11.0483	11.3045	ABHD8	17.5575	15.5989	16.9218	16.6588	14.2239	16.2914	ABHD8	12.5089	13.2954	13.1887	12.4542	12.4276	12.8955	ABHD8	16.7612	13.476	16.0596	14.2751	15.9323	16.3314
ABI1	39.1979	37.121	37.7758	38.0353	36.4121	35.4713	ABI1	49.9166	49.1202	49.4003	48.9972	50.1243	47.8659	ABI1	84.5289	82.9041	82.043	84.0383	89.6407	85.6593	ABI1	98.8595	102.601	104.133	95.9333	104.976	104.283
ABI2	24.8867	22.7452	23.0977	24.453	23.3328	23.1863	ABI2	21.0008	20.2953	21.8408	20.7916	19.7769	19.2472	ABI2	21.218	22.3635	21.4529	19.492	20.7972	20.0727	ABI2	50.3803	53.3425	51.5417	49.1796	50.1024	53.634
ABI3	0	0	0.035657	0.076544	0	0	ABI3	0	0.031007	0.037288	0	0	0.059463	ABI3	0	0	0	0	0	0	ABI3	0.033421	0	0.034286	0	0.044711	0
ABI3BP	0.356253	0.319772	0.187144	0.375806	0.335598	0.353069	ABI3BP	14.8276	14.6617	14.5142	16.519	16.6802	13.4995	ABI3BP	0	0.007268	0	0	0	0	ABI3BP	0	0	0	0	0	0
ABITRAM	18.8377	21.6874	20.4597	20.3829	20.277	18.6735	ABITRAM	16.7869	17.513	17.2083	17.2057	16.4834	16.1541	FAM206A	42.2819	43.8539	46.2041	44.6228	42.8902	45.4806	ABITRAM	41.0382	38.0411	37.914	34.7032	41.6306	38.1724
ABL1	47.699	46.962	45.588	46.492	45.3098	45.653	ABL1	63.9707	62.2738	64.4391	59.9263	62.388	57.7535	ABL1	30.359	30.0539	32.2638	30.0169	30.9111	31.0149	ABL1	82.5709	73.3711	83.632	67.1822	84.1458	89.9856
ABL2	13.0458	11.6911	11.1633	13.8934	10.9087	11.3567	ABL2	17.8223	15.7252	17.8111	15.8807	17.2647	15.4346	ABL2	24.5825	20.8489	23.9376	23.9143	23.9393	24.2857	ABL2	20.8569	19.1388	20.7461	17.7561	21.7406	24.4119
ABLIM1	50.0485	48.8728	44.9667	47.6399	46.3938	45.3456	ABLIM1	40.9719	40.4738	40.1286	39.1982	41.6521	38.8459	ABLIM1	46.292	46.0237	42.9136	42.0862	44.6637	45.902	ABLIM1	18.5283	17.6307	19.0242	18.0473	19.9422	20.5613
ABLIM2	2.32654	1.87048	1.65645	1.71651	2.39749	1.59698	ABLIM2	0.216663	0.170634	0.184592	0.248111	0.210082	0.177345	ABLIM2	0.56468	0.344778	0.425683	0.645173	0.423929	0.3546	ABLIM2	3.01276	3.51426	2.1852	2.8234	2.71454	2.86491
ABLIM3	2.92338	2.92817	2.77404	3.3467	2.88968	3.01726	ABLIM3	108.41	102.606	107.426	104.128	102.335	100.455	ABLIM3	79.9814	74.2057	71.5706	71.9495	69.1934	75.2894	ABLIM3	6.56688	6.51414	7.16144	6.08793	7.47809	7.4486
ABO	0.021128	0	0	0	0	0.008723	ABO	3.34602	3.91207	3.49363	3.62358	3.92343	3.4604								ABO	1.92874	1.26585	2.07291	1.69848	1.71339	1.41459
ABO	0.021128	0	0	0	0	0.008723	ABO	3.34602	3.91207	3.49363	3.62358	3.92343	3.4604								LOC114226776	0.46681	0.944385	0.524882	0.86604	0.469841	0.474123
ABR	68.4804	66.3366	65.8243	62.6247	61.6709	62.8074	ABR	115.118	107.399	113.141	104.846	105.129	105.538	ABR	56.066	56.4857	53.0746	53.2559	55.1976	56.1946	ABR	108.176	105.054	105.771	95.4514	109.867	111.608
ABR-AS1	0	0	0	0	0	0	ABR-AS1	0	0	0	0	0	0
ABR-AS1-2	0	0	0	0	0	0	ABR-AS1-2	0	0	0	0	0	0
ABRA	0	0	0	0	0	0	ABRA	0	0	0	0	0	0	ABRA	0	0	0	0	0	0	ABRA	0	0	0	0	0	0
ABRACL	59.5645	61.2295	59.9096	62.603	62.63	66.1973	ABRACL	100.477	102.205	94.4963	99.8902	103.114	106.297	ABRACL	7.89026	8.94305	9.45337	6.9421	9.22813	7.90429	ABRACL	190.817	182.698	189.675	174.214	183.95	170.062
ABRAXAS1	6.583	9.13344	6.61763	9.68275	9.75513	6.01143	ABRAXAS1	18.8432	15.5214	16.1398	16.799	15.0151	16.1276	ABRAXAS1	11.7277	11.1892	11.0818	9.83369	10.7594	11.4105	ABRAXAS1	23.3043	23.4661	24.4821	20.7613	24.5931	22.3521
ABRAXAS2	19.2645	19.5159	18.7102	18.5234	20.7574	19.1566	ABRAXAS2	17.6781	18.1109	16.736	18.4163	16.6765	18.1549	ABRAXAS2	10.9521	11.7692	10.9844	10.8976	11.119	11.0083	ABRAXAS2	17.7445	15.6838	17.4981	14.843	16.2816	17.9475
ABT1	13.9058	13.0789	13.5094	11.8044	12.5068	12.8134	ABT1	17.3003	15.3663	16.6772	16.32	15.9872	15.6931	ABT1	43.7002	42.1272	48.3833	49.2161	47.7046	45.0634	ABT1	50.2446	49.5499	54.496	46.6198	51.1132	52.4631
ABTB1	13.1012	12.6947	15.1834	12.8108	13.9942	15.1237	ABTB1	27.0118	24.8786	24.7928	26.0759	24.4152	25.2909								ABTB1	2.52957	2.46467	2.6447	2.25936	2.88127	2.94141
ABTB2	23.663	21.5109	23.2268	25.0802	20.9796	22.3918	ABTB2	29.6523	27.7569	28.2465	26.3194	27.117	26.6094	ABTB2	0.742312	0.799224	0.791449	0.938828	0.800783	0.870257	ABTB2	6.14027	6.00275	6.40061	5.81313	6.45973	7.38136
ABTB3	67.8541	56.5333	62.636	59.9177	52.6127	55.1029	ABTB3	0	0	0.014859	0.024808	0.009446	0
ACAA1	51.3497	52.1559	52.0799	55.7566	61.0685	58.2796	ACAA1	87.7176	84.3656	84.8609	98.6112	99.4441	97.1187	ACAA1	21.2664	21.5011	19.3934	18.9916	20.0617	19.632	ACAA1	73.3174	76.1653	70.508	68.2807	73.4856	67.9015
ACAA2	49.6461	48.2725	49.351	44.0959	46.8029	47.5582	ACAA2	77.9681	78.7931	76.3362	79.956	78.8197	78.7236	ACAA2	215.369	213.53	211.33	209.055	207.776	212.908	ACAA2	67.3997	68.0833	67.4384	63.2003	67.5258	64.5744
ACACA	3.29268	1.58637	3.17233	3.97042	1.80728	2.00805	ACACA	25.6228	22.2797	25.1087	22.2909	25.4891	22.4411	ACACA	44.2128	41.2726	43.1847	44.3331	46.5659	45.12	ACACA	32.8012	30.5197	29.4407	30.1738	32.0473	33.0304
ACACA-2	36.3224	35.9655	31.6013	36.3207	34.2857	34.6472	ACACA-2	8.88279	10.0057	8.3396	9.10822	8.89074	6.61283
ACACB	3.65873	3.58903	3.1557	3.64992	3.77407	3.6458	ACACB	4.72438	4.73644	4.86429	5.04044	4.89277	4.50904	ACACB	0.179956	0.264824	0.303195	0.201295	0.195007	0.205775	ACACB	3.02749	2.73433	3.14334	2.72246	3.46169	3.83573
ACAD10	11.3739	10.6729	10.6039	9.62699	11.1882	10.5546	ACAD10	11.5832	11.1562	11.1764	11.3157	11.23	11.1688	ACAD10	6.36309	6.88988	7.12443	6.48401	6.26914	6.1284	ACAD10	8.78396	9.76853	9.1392	8.89079	9.30584	8.96863
ACAD11	6.64122	5.59997	7.03519	6.73623	6.94532	5.67298	ACAD11	14.6405	13.5788	13.8836	13.9567	14.0657	13.4351	ACAD11	7.04839	8.23866	6.69205	6.48661	6.95435	8.05774	ACAD11	19.988	21.6131	20.7271	19.093	22.2185	20.7603
ACAD8	12.309	10.7975	13.1305	9.65113	11.5353	10.7845	ACAD8	25.0564	24.5669	22.6668	24.9617	24.704	24.3854	ACAD8	6.68102	7.44198	6.01135	6.14746	7.83403	7.73409	ACAD8	19.5314	17.7066	16.7767	18.3394	18.3005	16.0818
ACAD9	28.4087	31.0529	30.1214	29.519	31.9721	30.834	ACAD9	41.6043	43.7669	43.3444	43.6699	43.5467	42.2847	ACAD9	21.0793	20.0599	19.4719	20.3532	20.9041	20.2991	ACAD9	37.0585	37.062	38.3224	32.0396	38.8805	36.8861
ACAD9-DT	0.160148	0.135249	0.074239	0.199608	0.207234	0.183158	ACAD9-DT	0.155042	0.074186	0.088001	0.113892	0.095382	0.062989
ACADL	0.079784	0.177058	0.109326	0.093887	0.307849	0.068814	ACADL	2.97501	3.687	4.13118	3.29234	3.66105	3.38237	ACADL	1329.12	1375.42	1336.63	1365.31	1416.86	1422.35	ACADL	167.747	174.017	181.915	158.601	178.085	176.949
ACADM	34.743	33.3559	35.1443	33.6595	35.6571	38.9837	ACADM	46.5496	46.5458	45.3007	42.9671	44.6751	47.7576	ACADM	0	0	0.048054	0	0	0	ACADM	46.5977	47.028	48.7904	45.1584	49.4165	47.4148
ACADS	17.6619	18.8707	18.2733	16.3466	20.0269	21.2132	ACADS	39.7382	39.7562	38.4646	43.6817	42.7544	39.8321	ACADS	48.2045	51.3055	50.079	45.8296	46.7403	50.4293	ACADS	27.3364	24.0923	24.0592	24.843	22.2973	23.9148
ACADSB	13.5736	13.6237	12.7985	11.4764	13.4302	14.1311	ACADSB	11.7264	11.6953	11.6553	11.9452	11.9121	11.666	ACADSB	0.184123	0.215122	0.14457	0.380817	0.152094	0.323124	ACADSB	54.6666	53.0802	53.9774	53.2569	60.9172	52.907
ACADVL	194.116	182.177	181.798	186.719	181.884	193.832	ACADVL	337.148	333.398	322.546	345.173	341.248	327.965	ACADVL	79.7855	80.7144	82.7595	87.3533	82.6332	84.2344	ACADVL	152.384	150.218	150.26	141.061	148.113	148.128
ACAN	0	0.005905	0	0	0.00712	0.006899	ACAN	0	0	0	0	0	0	ACAN	0	0	0	0.017241	0	0	ACAN	1.99852	2.0144	1.85661	1.7143	1.78811	2.19026
ACAP1	0.109289	0.16169	0.247071	0.361668	0.121635	0.070691	ACAP1	0.141558	0.235168	0.212138	0.113208	0.237252	0.265773	ACAP1	0.590956	0.716439	0.533475	0.707013	0.692078	0.602186	ACAP1	0.460952	0.564056	0.572963	0.527359	0.464035	0.594024
ACAP2	10.1336	10.2422	9.29905	9.87931	9.19489	9.73295	ACAP2	15.9684	14.6332	16.8309	14.7397	15.3239	14.0314	ACAP2	52.3519	49.5383	52.115	54.0148	53.4356	53.3892	ACAP2	25.4404	26.0641	28.0287	23.7046	27.6302	27.9587
ACAP3	8.24622	7.68598	7.75956	7.2735	7.44375	7.33025	ACAP3	14.9178	14.8606	13.801	14.4372	12.9297	13.8999	ACAP3	13.1272	13.5054	13.8057	13.3428	13.3797	13.936	ACAP3	14.3804	14.7039	14.4535	12.435	14.7428	14.8941
ACAT1	89.265	93.5941	89.1151	89.9907	94.0875	93.7661	ACAT1	96.2939	98.752	98.369	96.2376	101.205	104.62	ACAT1	73.0838	69.3957	66.914	67.1217	71.1629	72.0163	ACAT1	139.48	141.664	142.676	137.525	142.707	145.833
ACAT2	82.8354	80.4808	85.48	79.1642	77.6707	77.9387	ACAT2	294.427	291.1	291.079	286.654	277.877	300.212	ACAT2	512.528	544.272	561.911	563.604	577.465	522.827	ACAT2	223.443	229.951	218.609	211.291	217.587	223.787
ACBD3	33.9559	34.4684	34.6117	34.2742	33.3443	33.0747	ACBD3	32.2679	32.0005	32.4282	29.8838	32.1422	30.7553	ACBD3	43.8717	41.7865	42.7735	43.4009	44.0029	44.514	ACBD3	37.2565	34.6251	38.3796	34.788	37.7193	40.3716
ACBD3-AS1	0	0	0	0.411202	0	0	ACBD3-AS1	0	0	0.193577	0	0.177585	0
ACBD4	14.8044	12.5511	13.4261	14.6873	13.3511	14.9756	ACBD4	14.303	13.401	12.9247	15.5386	14.1646	12.9872	ACBD4	8.68756	10.8807	10.9787	9.94821	9.39307	10.3236	ACBD4	25.1995	21.8941	23.969	20.5979	24.7252	22.0935
ACBD5	53.7504	51.4827	53.4283	55.4411	56.0841	56.7045	ACBD5	46.8689	49.2341	48.3185	47.6206	48.4131	48.9652								ACBD5	27.4691	27.1956	30.6215	24.2564	28.5635	28.8091
ACBD6	91.6824	87.9316	90.6537	86.2039	86.9474	81.2451	ACBD6	61.3867	63.3745	62.5615	63.1103	60.7768	61.0273	ACBD6	66.754	73.5641	68.4799	71.3155	69.1485	71.3207	ACBD6	39.2811	40.3926	36.186	34.0505	34.5099	37.0007
ACBD7	2.16772	2.28972	1.99751	2.57534	2.92426	2.72429	ACBD7	1.18877	1.15559	1.33722	1.0024	1.10285	1.14052	ACBD7	5.7143	5.63918	5.37497	6.47642	5.5982	4.96873	ACBD7	0.517243	0.483812	0.47565	0.73931	0.718374	0.774057
ACBD7-DCLRE1CP1	0.085413	0	0	0.067949	0	0	ACBD7-DCLRE1CP1	0	0	0	0	0	0
ACCS	5.82942	5.72813	5.44067	4.00454	6.4589	5.33147	ACCS	3.2296	3.6621	2.24656	3.21751	3.16765	2.68492	ACCS	10.8046	10.3017	9.85802	9.54461	9.89002	10.5071	ACCS	12.7759	13.0419	12.1588	10.5864	11.4002	11.1665
ACCSL	0.179366	0.066341	0.0737	0.052742	0.026611	0.051549	ACCSL	0.06633	0.064269	0.051532	0.154677	0.094312	0.103763	ACCSL	0.190873	0.092222	0.11389	0.059491	0.112553	0.167545	LOC103291030	0	0	0	0	0	0
ACCSL	0.179366	0.066341	0.0737	0.052742	0.026611	0.051549	ACCSL	0.06633	0.064269	0.051532	0.154677	0.094312	0.103763	ACCSL	0.190873	0.092222	0.11389	0.059491	0.112553	0.167545	LOC129147040	0.120551	0.056625	0.024803	0.240728	0.129334	0.139637
ACD	37.8807	38.8431	38.4399	41.3308	37.1249	37.9679	ACD	31.4236	29.357	31.5629	30.8312	27.6464	28.1815	ACD	29.564	30.9557	29.4894	25.9673	29.488	27.9066	ACD	31.0407	31.5684	31.7875	27.7849	32.1583	30.6798
ACE	0.150116	0.134301	0.149542	0.103208	0.280545	0.141447	ACE	0.173473	0.12152	0.089958	0.067537	0.119061	0.135812								ACE	2.18627	1.99088	2.12938	1.9217	1.81842	1.82124
ACE2	0	0.015709	0.023418	0.121481	0.162978	0.178734	ACE2	0.421617	0.347269	0.540522	1.57452	1.39977	1.59887	ACE2	0	0.016985	0.020951	0.022107	0	0	ACE2	0.118622	0.027554	0.120608	0.123417	0.188814	0.114665
ACE2-DT	0	0	0	0	0	0	ACE2-DT	0	0	0	0	0	0.106107
ACER1	0.044139	0	0	0	0.044438	0	ACER1	0.036774	0	0	0.136778	0.151917	0.103558	ACER1	0.094044	0	0.096127	0	0	0.091979	ACER1	0.023351	0.109696	0.096033	0.087435	0	0.045091
ACER2	2.00214	1.7029	1.68066	1.35287	1.49264	1.56983	ACER2	2.96824	3.23401	3.12798	2.55846	3.09154	2.76971	ACER2	2.26175	2.03657	2.12642	2.15173	2.47508	2.10592	ACER2	4.14318	4.40837	3.99291	4.07419	4.38625	4.66376
ACER3	26.754	25.3241	25.4639	26.9452	28.6819	31.2895	ACER3	11.8529	14.6416	14.6674	15.4181	14.7852	12.7506	ACER3	35.0141	32.6663	33.133	34.2202	33.4058	34.635	ACER3	31.1418	31.6403	31.5365	30.0615	32.0792	32.3922
ACHE	0.112939	0.19151	0.092908	0.259317	0.167912	0.14216	ACHE	0.069734	0.102898	0.077799	0.065036	0.097277	0.147313	ACHE	0.449582	0.335187	0.301244	0.37254	0.276872	0.080337	ACHE	1.52458	1.36329	1.95447	1.70653	1.51971	1.79643
ACIN1	100.24	96.836	97.1003	102.404	102.703	100.963	ACIN1	97.9808	88.5171	88.545	88.6431	90.6412	88.4533								ACIN1	73.2793	69.3533	82.5162	59.9759	76.8008	80.8016
ACKR1	0	0	0	0	0.114558	0	ACKR1	0	0	0	0	0	0	ACKR1	0	0	0	0	0	0	ACKR1	0	0	0	0	0	0
ACKR2	0.116426	0.016985	0.036382	0.039044	0.074994	0.088035	ACKR2	0.398601	0.206408	0.364702	0.231966	0.256482	0.247949	ACKR2	0	0.048289	0	0	0	0.056218	ACKR2	0.135532	0.136728	0.199671	0.060483	0.130316	0.159613
ACKR3	2.98036	2.57174	2.46186	2.71709	2.47335	2.44325	ACKR3	0	0	0	0	0	0	ACKR3	19.1486	19.8607	18.8627	17.493	18.2058	17.8472	ACKR3	246.334	253.81	253.948	237.17	242.517	246.863
ACKR4	0.058325	0	0.071902	0.257279	0.155766	0.2766	ACKR4	0.021573	0.041807	0	0	0.042124	0.040499	ACKR4	0.542879	0.479714	0.295671	0.359683	0.484652	0.588234	ACKR4	0	0.048506	0.042472	0.077309	0.193951	0.019948
ACLY	359.662	362.684	343.091	358.491	356.665	351.34	ACLY	180.735	169.328	168.418	171.397	174.467	165.361	ACLY	581.331	576.24	601.181	584.619	601.342	583.588	ACLY	205.671	205.018	203.756	190.519	210.027	211.625
ACMSD	0	0.044405	0.06011	0	0.106604	0	ACMSD	36.5699	36.7915	35.6438	40.4198	37.1751	36.9936	ACMSD	0	0	0	0	0	0	ACMSD	0	0	0	0	0	0
ACO1	26.2762	27.0136	25.762	20.1079	17.6349	19.0993	ACO1	47.1529	47.4597	45.4923	37.965	39.0981	36.6974	ACO1	101.443	100.054	95.4502	94.4017	98.2312	95.0901	ACO1	73.495	72.5142	70.9393	69.0015	73.8193	72.5244
ACO2	72.4775	72.3647	68.3321	68.7614	71.4424	71.4439	ACO2	123.391	122.12	123.901	122.402	120.199	119.008	ACO2	301.958	306.618	296.76	287.902	283.915	287.481	ACO2	129.07	130.585	127.72	122.352	126.852	128.497
ACOD1	0	0	0	0	0	0	ACOD1	0	0	0	0.033406	0	0	ACOD1	0	0	0	0.101409	0	0.06168	ACOD1	0	0	0.023908	0	0	0.022452
ACOT1	13.6043	12.9688	17.2022	18.366	16.6505	19.5791	ACOT1	11.3722	7.9436	9.93046	10.046	10.192	10.686
ACOT11	2.65611	2.44958	2.23308	1.83256	2.74062	2.24261	ACOT11	0.992337	0.615364	0.870951	0.889294	0.69666	0.747523	ACOT11	8.4982	7.15591	7.6528	6.23803	7.29613	7.31558	ACOT11	10.2774	8.84406	10.6284	8.33866	10.5217	10.6383
ACOT12	0	0.024116	0	0	0.087041	0	ACOT12	0	0	0	0	0	0.023904	ACOT12	0	0.051752	0.031789	0.033377	0	0	ACOT12	0	0	0	0	0	0
ACOT13	17.1872	17.2344	17.7891	21.4852	21.8301	20.4939	ACOT13	14.0373	13.6257	13.7874	13.7304	13.2558	13.7482	ACOT13	95.5876	96.4994	96.7896	94.0784	93.491	102.153	ACOT13	70.3861	75.7875	68.9176	63.4408	68.0984	66.085
ACOT2	104.022	101.266	103.215	116.295	106.279	111.451	ACOT2	26.2329	23.9081	23.5011	25.8811	23.3202	25.6845								LOC103283892	1.65635	1.9875	1.42389	2.04531	1.84961	1.31392
ACOT4	4.40801	2.79455	3.05704	3.53677	3.74512	4.12628	ACOT4	1.63923	1.13814	1.41007	1.29394	1.17643	1.40339								ACOT4	69.2368	68.9349	68.2097	65.749	73.2414	71.2838
ACOT6	0	0	0	0	0	0	ACOT6	0	0	0	0.053682	0.058831	0	ACOT6	4.39083	4.58845	3.28026	3.58353	3.92651	4.51792	ACOT6	26.8085	25.9127	27.1601	24.3722	25.7049	25.2884
ACOT7	67.869	70.0573	68.3382	68.4329	68.1268	70.2669	ACOT7	110.808	118.149	117.457	110.985	108.464	111.231	ACOT7	102.643	111.529	107.477	116.312	110.917	105.733	ACOT7	37.2645	34.6591	35.9842	32.8911	36.6786	38.0239
ACOT7	67.869	70.0573	68.3382	68.4329	68.1268	70.2669	ACOT7	110.808	118.149	117.457	110.985	108.464	111.231	ACOT7	102.643	111.529	107.477	116.312	110.917	105.733	PDSS2	23.6252	23.9447	22.8786	20.5076	22.3093	22.626
ACOT8	22.9835	21.4673	18.6624	21.5449	21.095	21.8089	ACOT8	31.5328	30.8091	29.0764	30.1185	29.3117	30.7311	ACOT8	58.1313	61.0918	57.2266	53.4171	55.7184	59.182	ACOT8	22.2814	22.3939	21.5963	21.7197	21.4742	21.3722
ACOT9	27.8063	27.0555	29.2088	28.2346	29.2813	27.8774	ACOT9	25.8848	25.1501	25.6861	24.7985	23.3125	25.7035	ACOT9	36.1171	35.2418	34.6946	34.4159	35.4731	35.6053	ACOT9	44.6979	44.6575	45.1374	40.456	42.6494	43.4408
ACOX1	11.3263	10.7698	10.2717	9.8505	10.7964	11.0512	ACOX1	17.4312	16.9127	16.9777	16.9442	16.5572	16.089	ACOX1	70.9994	73.8489	75.6811	73.8175	75.4193	74.6512	ACOX1	81.3507	79.3023	79.9842	76.8692	79.8783	84.6293
ACOX2	4.6966	5.11598	4.51042	4.0888	4.31738	5.03971	ACOX2	1.55006	1.62861	1.5608	1.80016	1.76451	2.16935	ACOX2	4.63307	4.36755	4.1845	4.48784	4.84596	4.08422	ACOX2	16.3166	16.1465	15.1113	14.4681	16.2963	15.7122
ACOX3	9.08315	8.35208	7.83745	7.86871	7.97917	8.54542	ACOX3	13.2064	12.639	12.7708	12.2696	12.7623	12.3983	ACOX3	3.62451	3.54407	3.11491	3.42319	3.18066	3.31553	ACOX3	22.5816	22.6113	21.2206	20.2796	20.2286	21.195
ACOXL	0.104386	0.077137	0.095007	0.059089	0.07164	0.0194	ACOXL	0.134492	0.126483	0.06934	0.096757	0.227133	0.135072	ACOXL	0.113566	0.192995	0.095124	0.100242	0.131356	0.068354	ACOXL	0	0	0	0	0	0
ACOXL-AS1	0	0	0	0	0	0	ACOXL-AS1	0.015179	0	0	0	0.016195	0
ACP1	198.487	194.748	192.266	191.905	191.912	177.096	ACP1	104.869	108.567	108.749	113.396	113.116	112.692	ACP1	269.987	273.214	268.422	260.411	255.181	255.779	ACP1	171.475	166.481	168.432	154.564	165.767	171.22
ACP2	42.5218	40.8866	35.8486	43.9414	49.5063	44.6128	ACP2	73.66	71.0349	72.036	70.8478	76.134	74.0652	ACP2	31.9768	32.4096	28.7992	29.0518	29.6835	27.9842	ACP2	32.9898	33.2221	33.1763	32.6596	34.5003	34.6463
ACP3	0.116079	0.034696	0.135356	0.156523	0.074873	0.159028	ACP3	5.2996	4.20097	5.54313	6.77925	5.69152	6.8581	ACPP	0	0	0	0	0.047871	0	ACP3	3.40654	2.5136	2.67246	2.69211	3.03535	3.08562
ACP4	0	0	0	0	0	0.046091	ACP4	0	0	0	0	0	0	ACP4	0	0	0	0	0	0	ACP4	0	0	0	0	0	0
ACP5	0.182079	0.076693	0.127421	0.227928	0.080926	0.178378	ACP5	5.63066	5.30617	6.48938	6.0407	5.72404	5.47726	ACP5	260.413	264.166	230.341	222.679	230.744	242.405	ACP5	3.68064	3.12302	2.74354	2.40404	2.29691	2.69722
ACP6	12.5699	11.2267	12.9543	12.8911	10.2534	12.5701	ACP6	55.5643	50.8328	49.252	49.3771	45.482	52.0715	ACP6	31.5141	31.1498	29.6528	25.8324	27.037	27.4466	ACP6	4.5977	3.80005	3.62458	3.89442	4.5541	3.8494
ACP7	0.096165	0.20213	0.078771	0.122717	0.143858	0.109902	ACP7	0.070123	0.067937	0.027252	0	0.038839	0.05137	ACP7	0.038649	0.098598	0.080495	0	0.031663	0.077086	ACP7	0.973045	0.64081	0.541906	0.623608	0.777636	0.856631
ACR	0	0.036972	0.081623	0.175209	0.088508	0.12854	ACR	0.036624	0	0	0	0	0	ACR	7.60149	8.0174	7.72241	6.2684	6.18533	6.87585	ACR	0	0	0	0	0	0
ACRBP	0.072072	0.026655	0.029588	0.127037	0.09618	0	ACRBP	0.452286	0.721524	0.49585	0.595227	0.964319	0.474305	ACRBP	0.029829	0.050709	0	0	0.024551	0.149202	ACRBP	0.024699	0.087004	0.076161	0.092474	0.165591	0.166857
ACRV1	0.040226	0.104733	0.03004	0.064489	0.062988	0.091502	ACRV1	0	0.02616	0.034542	0	0.031615	0	ACRV1	0.306097	0.312705	0	0.196477	0.099131	0.181698	ACRV1	1.15184	0.961485	0.952079	0.477977	0.58378	0.995909
ACSBG1	0.054332	0.022798	0.055921	0.03839	0.052592	0.055714	ACSBG1	0.076104	0.083184	0.047513	0.129076	0.235028	0.161298	ACSBG1	0	0	0	0.023803	0	0	ACSBG1	5.14598	5.26944	5.1055	4.01156	4.91049	5.14051
ACSBG2	0	0	0	0	0	0	ACSBG2	0	0	0	0	0	0.044075	ACSBG2	0	0	0	0	0	0.044935	ACSBG2	0.101254	0.025016	0.065711	0.053165	0.028578	0.041147
ACSF2	18.8465	21.0114	17.977	18.8219	20.9611	21.3964	ACSF2	3.82984	4.48741	3.27167	4.99127	4.71323	3.90541	ACSF2	0.058317	0.099136	0.2437	0.16002	0.24008	0.233413	ACSF2	20.1066	19.1711	20.8471	18.5046	19.6122	19.9548
ACSF3	13.3385	12.5843	12.2345	11.148	13.5451	14.3614	ACSF3	13.9237	14.9178	13.5325	13.5015	14.3028	13.5845	ACSF3	16.2577	16.4346	13.4467	13.6167	15.7585	15.1655	ACSF3	7.93132	8.68686	8.32754	8.29428	9.04226	8.56851
ACSL1	17.514	19.2422	18.5158	15.2879	17.8941	17.3411	ACSL1	299.868	304.073	293.604	312.338	318.959	306.631	ACSL1	16.43	17.2759	16.6525	17.0607	16.7121	17.2916	ACSL1	12.5883	11.9647	13.4898	11.3745	12.8309	13.1295
ACSL3	98.3895	96.9844	94.4443	103.971	100.609	100.071	ACSL3	80.6633	82.8287	83.3625	80.7084	81.3451	80.6146								ACSL3	137.22	138.284	142.685	130.871	141.443	142.814
ACSL3-AS1	0	0	0	0	0	0.093447	ACSL3-AS1	0	0	0	0.111297	0	0
ACSL4	56.3681	53.5759	51.835	57.4316	55.8845	55.6368	ACSL4	125.669	124.415	127.776	126.597	126.601	118.478	ACSL3	91.1678	87.1379	89.7091	86.332	90.869	90.8394	ACSL4	93.8528	93.9324	95.0379	87.6418	93.728	93.5507
ACSL4	56.3681	53.5759	51.835	57.4316	55.8845	55.6368	ACSL4	125.669	124.415	127.776	126.597	126.601	118.478	LOC102887938	729.748	676.374	696.936	720.815	729.442	706.675	ACSL4	93.8528	93.9324	95.0379	87.6418	93.728	93.5507
ACSL5	0.843763	1.1975	1.13976	1.2306	1.43331	1.43189	ACSL5	8.44849	8.22293	7.86471	8.13151	9.07938	8.46892	ACSL5	53.7184	50.8896	49.6679	54.6623	57.674	56.255	ACSL5	1.23372	1.30729	1.97581	1.41042	1.56403	1.88271
ACSL6	0.05386	0.058995	0.017034	0.009276	0.0267	0.085993	ACSL6	0.007678	0.015271	0	0	0	0	ACSL6	0	0	0	0	0	0
ACSL6-AS1	0	0	0	0	0	0	ACSL6-AS1	0	0	0	0	0	0
ACSM1	0	0.033644	0	0	0	0	ACSM1	2.14727	2.24665	2.0023	2.68566	2.70496	2.83495								LOC114229714	0	0	0.026934	0.03271	0	0.05057
ACSM1	0	0.033644	0	0	0	0	ACSM1	2.14727	2.24665	2.0023	2.68566	2.70496	2.83495								LOC114229717	0	0	0	0	0	0
ACSM1	0	0.033644	0	0	0	0	ACSM1	2.14727	2.24665	2.0023	2.68566	2.70496	2.83495								LOC129148666	0	0	0	0	0	0
ACSM1	0	0.033644	0	0	0	0	ACSM1	2.14727	2.24665	2.0023	2.68566	2.70496	2.83495								LOC129148786	0	0	0	0	0	0
ACSM1	0	0.033644	0	0	0	0	ACSM1	2.14727	2.24665	2.0023	2.68566	2.70496	2.83495								LOC129148787	0	0	0	0	0	0
ACSM2A	0.166307	0.173213	0.065978	0.14318	0.27965	0	ACSM2A	0	0	0	0	0	0								LOC103302977	0	0	0	0	0	0
ACSM2B	0.162478	0.24976	0.133061	0	0.139115	0.264828	ACSM2B	0	0.038485	0	0	0	0
ACSM3	10.5244	11.1683	9.91529	9.01273	11.6169	12.6099	ACSM3	18.2219	18.6093	16.5696	21.0921	20.6852	20.2071	ACSM3	9.95108	8.80166	6.98388	7.03571	6.8091	10.0981
ACSM4	0	0	0	0	0	0	ACSM4	0	0	0	0	0	0
ACSM5	0.071631	0.08455	0.108826	0.062955	0.063798	0.061516	ACSM5	0.236789	0.291589	0.283093	0.269505	0.246008	0.084473								ACSM3	3.95082	4.49602	4.06113	4.16983	4.87279	5.2491
ACSM6	0	0.030774	0	0.036637	0.075251	0.072869	ACSM6	0	0	0	0	0	0.029251								LOC103302975	0	0	0	0	0	0
ACSS1	6.10519	6.78414	6.27016	5.71967	7.83284	7.03219	ACSS1	9.59038	9.04287	9.07996	9.71625	9.69268	8.72119	ACSS1	32.9899	32.5992	34.1721	31.9512	32.8433	31.3255	ACSS1	5.68755	6.3364	6.06979	5.93857	6.04514	5.85599
ACSS2	16.328	15.8622	16.7489	16.1131	16.8096	17.4311	ACSS2	81.9177	80.2494	79.358	75.8323	79.9207	78.4703	ACSS2	350.624	336.979	335.995	345.953	341.1	349.26	ACSS2	16.8549	17.616	15.7305	16.6072	17.1542	16.7469
ACSS3	0.293899	0.404347	0.496674	0.633389	0.360459	0.10441	ACSS3	0.049762	0.099481	0.174614	0.082965	0.084889	0.056623	ACSS3	51.0634	49.988	49.2498	46.2276	48.4246	50.5061	ACSS3	15.2714	15.4945	15.5696	13.9844	15.6767	15.6816
ACTA1	0.142713	0.070375	0.156027	0	0.084534	0.204806	ACTA1	0.245142	0.067757	0.040728	0.146705	0.037277	0.032809								ACTA1	9.05156	9.46735	8.83909	8.79375	9.84355	9.38616
ACTA2	13.1505	14.1731	14.2104	15.0516	14.8311	15.4009	ACTA2	14.661	13.8923	12.3625	13.9772	14.0512	13.675								ACTA2	18.0916	16.7878	16.1668	15.3439	14.8962	15.5686
ACTA2-AS1	0.133427	0.049349	0.054797	0	0	0.086247	ACTA2-AS1	0.073939	0.047751	0.028721	0.034472	0.026278	0
ACTB	5296.11	5253.03	5057	5325.54	4907.02	5038.39	ACTB	5210.26	5121.69	5338.04	4941.98	4838.67	4768.3	ACTA2	9.09178	7.49161	8.71538	9.5894	8.81276	7.75093	ACTB	10146.3	10275.6	9801.66	9617.9	9761.86	9924.33
ACTB	5296.11	5253.03	5057	5325.54	4907.02	5038.39	ACTB	5210.26	5121.69	5338.04	4941.98	4838.67	4768.3	ACTB	6590.65	6225.71	6645.26	6642.98	6258.19	6270.17	ACTB	10146.3	10275.6	9801.66	9617.9	9761.86	9924.33
ACTB	5296.11	5253.03	5057	5325.54	4907.02	5038.39	ACTB	5210.26	5121.69	5338.04	4941.98	4838.67	4768.3	ACTG1	3183.95	3011.63	3186.38	3199.94	2911.94	3016.62	ACTB	10146.3	10275.6	9801.66	9617.9	9761.86	9924.33
ACTB	5296.11	5253.03	5057	5325.54	4907.02	5038.39	ACTB	5210.26	5121.69	5338.04	4941.98	4838.67	4768.3	ACTG2	0.04808	0.204299	0.099704	0.051916	0.078305	0.095471	ACTB	10146.3	10275.6	9801.66	9617.9	9761.86	9924.33
ACTB	5296.11	5253.03	5057	5325.54	4907.02	5038.39	ACTB	5210.26	5121.69	5338.04	4941.98	4838.67	4768.3	LOC102882558	0	0	0	0	0	0	ACTB	10146.3	10275.6	9801.66	9617.9	9761.86	9924.33
ACTBL2	0.094995	0.035137	0.078133	0	0.021152	0.02049	ACTBL2	2.86814	2.02962	2.74896	2.21713	1.82074	2.16429								ACTG1	5445.36	5451.45	5070.95	5147.03	5062.44	5129.61
ACTC1	0.155528	0.268406	0.082999	0.31521	0.176825	0.089171	ACTC1	0	0	0.04432	0.106369	0	0.071432								ACTC1	123.811	99.0568	103.239	99.4685	93.9681	107.092
ACTE1P	0	0	0	0	0.051045	0	ACTE1P	0	0	0	0	0	0
ACTG1	5291.48	5528.42	5136.92	5179.16	4955.84	4597.46	ACTG1	5160.29	5157.7	5318.73	5013.33	4948.02	4898.91
ACTG1P17	0.230741	0.185516	0.224757	0.112023	0.075251	0.073154	ACTG1P17	0.220216	0.060452	0.243488	0.087197	0.033234	0.237578
ACTG1P20	0.828275	0.467269	0.542838	0.41901	0.81616	0.545453	ACTG1P20	0.48392	0.2614	0.417984	0.392633	0.34582	0.325804
ACTG1P25	0.116743	0	0.139304	0.182529	0.15597	0.151019	ACTG1P25	0.152122	0.104431	0.17605	0.120476	0.139354	0.102584
ACTG1P4	0.034387	0	0.028242	0.06064	0	0	ACTG1P4	0.050813	0.123062	0.088797	0.035528	0.027084	0.095381
ACTG2	0.940335	1.09233	0.965547	0.964516	1.25308	1.13525	ACTG2	1.00733	1.79691	0.982645	1.55425	1.06316	0.935732								ACTG2	0.967316	0.614442	0.620804	0.251606	0.754652	1.16326
ACTL10	0	0.032801	0	0	0	0	ACTL10	4.89933	4.80616	4.33469	3.65067	4.00248	4.71749	ACTL10	0	0	0	0	0	0	ACTL10	0	0	0	0	0	0
ACTL6A	72.152	73.4645	70.3161	71.6996	76.5274	74.4882	ACTL6A	62.9933	65.7996	65.8656	65.8282	69.9728	67.861	LOC102896269	158.348	153.361	155.14	158.288	151.333	158.55	ACTL6A	79.0017	81.7178	83.4256	75.6045	85.8639	79.2416
ACTL6A	72.152	73.4645	70.3161	71.6996	76.5274	74.4882	ACTL6A	62.9933	65.7996	65.8656	65.8282	69.9728	67.861	LOC102896523	19.2328	20.047	18.8929	21.0747	19.565	18.8839	ACTL6A	79.0017	81.7178	83.4256	75.6045	85.8639	79.2416
ACTL6A	72.152	73.4645	70.3161	71.6996	76.5274	74.4882	ACTL6A	62.9933	65.7996	65.8656	65.8282	69.9728	67.861	LOC112473505	0	0	0	0	0	0	ACTL6A	79.0017	81.7178	83.4256	75.6045	85.8639	79.2416
ACTL6B	0	0	0	0	0	0	ACTL6B	0	0	0	0	0	0	ACTL6B	0	0.037649	0	0	0	0	ACTL6B	0	0	0	0	0	0
ACTL7A	0	0	0	0	0	0	ACTL7A	0	0	0	0	0	0	ACTL7A	0	0	0	0	0	0	ACTL7A	0	0	0	0	0	0
ACTL7B	0	0	0	0	0	0	ACTL7B	0	0	0	0	0.039995	0	ACTL7B	0	0	0	0	0	0	ACTL7B	0.046628	0	0.047941	0.029099	0	0
ACTL8	0.524019	0.885966	0.737426	0.824524	0.898998	0.612658	ACTL8	0	0	0	0	0.029694	0.05227	ACTL8	0	0	0	0	0	0	ACTL8	0	0	0	0	0	0
ACTL9	0	0	0	0	0	0	ACTL9	0	0	0	0	0	0	ACTL9	0	0	0	0	0	0	ACTL9	0	0	0	0	0	0
ACTMAP	21.2163	17.771	17.8592	20.3538	21.7428	20.7376	ACTMAP	11.6966	11.1662	11.4308	11.3992	11.4171	8.83642
ACTN1	282.087	275.883	270.695	316.868	292.24	302.348	ACTN1	414.709	387.947	403.477	372.192	379.859	378.205	ACTN1	205.169	197.5	206.64	200.281	200.118	198.374	ACTN1	698.015	650.768	684.637	611.439	680.214	727.415
ACTN1-DT	0	0.110864	0.121163	0.389907	0.264178	0.255292	ACTN1-DT	0.107236	0.103174	0	0	0.113658	0.200045
ACTN2	0	0	0	0.05845	0.011784	0	ACTN2	0.009822	0	0.01146	0	0	0.036918	ACTN2	8.40218	8.35073	8.32723	8.92367	8.77531	7.85828	ACTN2	0.203454	0.119714	0.244726	0.183558	0.212838	0.065728
ACTN3	0.045957	0	0	0	0	0	ACTN3	0	0	0.073724	0	0.054512	0.015988	ACTN3	0.098251	0.10014	0.102953	0.086945	0.113806	0.078897	ACTN3	0.051952	0.040732	0.03566	0	0.04653	0.067028
ACTN4	856.58	805.072	829.943	877.411	798.482	803.248	ACTN4	721.894	670.257	700.149	674.77	699.992	657.452	ACTN4	245.4	240.014	249.216	251.986	241.921	242.459	ACTN4	461.436	453.686	459.692	425.739	462.767	492.205
ACTR10	33.6738	33.0413	33.412	32.1605	37.0995	33.2483	ACTR10	48.5084	48.9873	44.8055	47.2782	45.2771	46.9619	ACTR10	39.5995	40.7337	39.4182	38.5573	40.4292	41.2206	ACTR10	99.3241	101.174	104.058	92.4904	102.505	98.3814
ACTR1A	126.84	121.603	125.732	119.87	111.612	119.86	ACTR1A	127.709	119.849	121.068	117.36	114.277	117.666								ACTR1A	197.812	204.65	197.088	196.894	195.338	196.375
ACTR1B	42.8493	41.7545	43.4395	40.6462	37.5208	39.994	ACTR1B	88.7121	87.5529	86.279	85.4606	84.0139	82.6763	ACTR1A	160.616	164.068	165.495	155.681	162.578	159.511	ACTR1B	142.775	141.231	147.309	134.561	143.021	140.99
ACTR1B	42.8493	41.7545	43.4395	40.6462	37.5208	39.994	ACTR1B	88.7121	87.5529	86.279	85.4606	84.0139	82.6763	ACTR1B	74.124	79.3745	79.5222	79.9749	76.444	76.1966	ACTR1B	142.775	141.231	147.309	134.561	143.021	140.99
ACTR2	244.815	238.577	236.37	235.23	234.388	243.821	ACTR2	254.228	259.379	264.627	254.436	265.826	253.866	ACTR2	290.333	280.578	286.126	292.259	281.746	288.896	ACTR2	236.491	242.205	245.205	214.689	238.253	231.982
ACTR3	76.8973	78.6632	76.9839	77.8133	76.754	73.6591	ACTR3	144.743	147.781	149.477	142.04	147.873	149.11	ACTR3	254.294	246.85	252.961	254.551	256.923	255.702	ACTR3	400.176	407.033	414.659	383.606	403.88	402.307
ACTR3	76.8973	78.6632	76.9839	77.8133	76.754	73.6591	ACTR3	144.743	147.781	149.477	142.04	147.873	149.11	ACTR3B	16.8847	17.6538	15.9303	14.337	14.4819	17.5471	ACTR3	400.176	407.033	414.659	383.606	403.88	402.307
ACTR3-AS1	1.22147	0.489225	0.466536	0.917381	0.269944	1.16581	ACTR3-AS1	1.8618	0.526745	0.506164	1.05992	1.16051	1.12345
ACTR3B	9.32537	8.77855	8.24941	6.0763	6.74134	5.15081	ACTR3B	5.21311	5.5603	5.28146	4.97763	5.12458	5.21483								ACTR3B	8.99135	9.85267	10.4213	9.26026	9.01743	9.00794
ACTR3BP2	0	0	0	0	0	0	ACTR3BP2	0	0	0	0	0	0
ACTR3BP5	0	0	0	0	0	0	ACTR3BP5	0	0.030565	0	0	0.066647	0.089308
ACTR3C	0.420466	0.267919	0.31748	0.727579	0.467112	0.459026	ACTR3C	11.3011	13.3086	10.9673	10.8802	11.867	13.1496
ACTR5	11.5688	11.6827	11.877	10.3265	10.9794	10.9519	ACTR5	9.16782	8.132	8.73946	8.69964	8.32828	8.24203	ACTR5	16.9187	16.1125	17.6603	17.2259	17.4568	16.4631	ACTR5	5.83263	5.66121	5.85274	5.35789	5.75558	6.36493
ACTR6	30.1382	31.2942	31.4203	30.1301	32.4703	29.5793	ACTR6	18.4046	19.6088	19.2781	20.5811	21.6552	20.2475	ACTR6	12.184	13.9318	12.7192	12.246	11.9785	12.6589	ACTR6	16.1028	15.5251	16.7395	13.6252	15.0449	14.1743
ACTR8	15.9654	15.0659	14.8676	15.1504	13.7038	15.4857	ACTR8	36.6877	35.7332	33.8349	35.6651	36.8326	36.6234	ACTR8	23.0886	21.6089	23.986	22.3309	23.4236	21.7701	ACTR8	29.0754	29.4119	33.1678	26.6257	30.9982	30.2757
ACTRT1	0	0	0	0	0	0	ACTRT1	0	0	0	0	0	0	LOC102893792	0	0	0	0	0	0	ACTRT2	0	0.042048	0	0	0	0
ACTRT2	0	0	0	0	0	0	ACTRT2	0	0	0	0	0	0	ACTRT2	0	0	0.120545	0	0	0
ACTRT3	4.46371	4.04221	3.45666	4.11429	5.11917	4.0232	ACTRT3	4.82759	4.67707	4.58279	4.89877	3.89964	4.55716	ACTRT3	13.503	12.6252	13.654	14.4501	14.7229	13.6526	ACTRT3	0.071173	0.333708	0.03649	0.044372	0	0
ACVR1	16.8561	16.2234	14.3235	16.1838	14.3424	16.4504	ACVR1	38.6718	39.513	38.0546	39.081	38.5256	37.6569	ACVR1	35.1186	33.1904	33.6943	32.6168	33.539	33.7765	ACVR1	38.1372	38.0006	38.4311	35.6507	39.6308	40.1808
ACVR1B	21.4074	20.121	19.7298	19.373	19.6391	20.1251	ACVR1B	46.9319	47.5	46.9281	47.8576	49.4469	46.1056	ACVR1B	13.2184	13.4585	12.814	12.829	12.7532	13.1319	ACVR1B	5.39428	5.65475	7.13644	6.5362	6.28322	8.08875
ACVR1C	0.007556	0.021747	0.012458	0.019177	0.032773	0.013061	ACVR1C	0.154261	0.149678	0.15964	0.107404	0.181067	0.189964	ACVR1C	0	0.051328	0	0	0.048841	0	ACVR1C	0.045671	0.040304	0.02354	0.02853	0.015363	0.022134
ACVR2A	2.21534	2.08899	2.1456	2.11536	2.14916	2.07973	ACVR2A	3.09051	3.40545	3.27791	3.06663	2.98877	2.75761	ACVR2A	5.61711	4.37912	5.42159	4.0507	4.87088	4.92407	ACVR2A	7.87696	8.01844	8.97029	7.12137	7.34211	7.34932
ACVR2B	1.77291	1.63744	1.68095	2.08878	1.79246	1.7109	ACVR2B	1.34324	1.42065	1.43871	1.35292	1.51557	1.19497	ACVR2B	2.78503	2.42131	2.37856	2.496	2.08189	2.40463	ACVR2B	1.61106	1.40011	1.37838	0.81879	1.55807	1.7534
ACVR2B-AS1	0.40006	0.553243	0.612596	0.419048	0.402295	0.252101	ACVR2B-AS1	0.431711	0.305026	0.252228	0.469969	0.419628	0.240074
ACVRL1	0.037313	0.091839	0.027606	0.074649	0.114543	0.203293	ACVRL1	0.465388	0.526006	0.424553	0.700522	0.366016	0.31381	ACVRL1	0.033293	0	0	0	0	0	ACVRL1	6.76539	6.65722	7.42716	6.96871	8.18622	6.8766
ACY1	26.9255	30.1455	29.0898	29.087	28.9226	25.4565	ACY1	89.9103	96.2903	91.7745	92.5239	94.9696	88.3018								ACY1	63.0733	63.8215	60.3148	61.442	61.3278	60.8197
ACY3	3.44396	4.17958	3.51203	5.28972	6.48152	5.63522	ACY3	0	0	0	0.06055	0	0	ACY3	0.217224	0.061677	0.074548	0	0.058304	0	ACY3	0	0	0	0	0	0
ACYP1	28.4032	26.735	33.6278	26.5265	30.7342	30.7091	ACYP1	23.4561	25.5433	26.3929	20.2288	26.2665	21.6048	ACYP1	24.011	26.9283	29.0519	25.1986	26.5965	21.1157	LOC103283568	21.093	15.2625	28.2593	17.5626	24.4538	22.5531
ACYP1	28.4032	26.735	33.6278	26.5265	30.7342	30.7091	ACYP1	23.4561	25.5433	26.3929	20.2288	26.2665	21.6048	ACYP1	24.011	26.9283	29.0519	25.1986	26.5965	21.1157	LOC129148616	24.7725	27.9185	18.8148	25.7539	20.3575	22.1377
ACYP2	12.8983	12.7037	12.7969	12.4473	14.0846	11.5883	ACYP2	19.2816	19.7138	20.1878	20.8738	18.4836	23.6992	ACYP2	9.71872	9.25836	9.54116	9.32021	11.0489	9.89381	ACYP2	24.6279	22.341	24.2133	20.8874	24.2413	23.4989
ADA	28.7571	27.3102	26.4855	27.1184	27.7633	26.2345	ADA	1.12618	0.892296	1.48347	1.07311	0.630354	0.909902	ADA	10.9239	12.7667	10.604	10.3194	11.1469	10.3811	ADA	1.48623	1.86396	1.02802	1.2068	1.34056	1.36321
ADA2	0	0.068136	0.045023	0.01618	0.05668	0	ADA2	0.083404	0.078717	0.063791	0.076903	0.054678	0.018731	ADA2	0.038649	0.098598	0.523217	0.126291	0.158316	0.077086	ADA2	0	0	0	0	0	0
ADAD1	0	0	0	0	0	0	ADAD1	0	0	0	0	0	0	ADAD1	0	0	0	0	0	0	ADAD1	0	0	0	0	0.032864	0
ADAD2	0	0	0	0	0	0	ADAD2	0	0	0.029102	0	0	0	ADAD2	0	0	0	0	0	0	ADAD2	0	0	0	0	0	0
ADAL	5.53052	5.12479	5.3454	4.43533	4.8408	4.90743	ADAL	6.89923	6.48431	6.74996	6.14952	5.98591	7.46657								ADAL	11.4626	9.53414	10.117	9.6979	11.11	10.6191
ADAM10	54.0866	50.9534	51.3013	54.398	52.4612	53.4618	ADAM10	62.8261	61.084	63.1418	61.608	61.2747	59.9417	ADAM10	82.3189	82.7808	80.4063	81.6732	80.8863	83.6134	ADAM10	90.9893	94.4962	101.709	91.0388	99.8017	101.028
ADAM11	1.11867	1.19026	1.06661	1.08944	1.12586	1.1292	ADAM11	0.271013	0.168218	0.126471	0.212676	0.150408	0.162937	ADAM11	1.40561	1.29872	1.44202	1.31503	1.35534	1.25698	ADAM11	0.186992	0.024411	0.192366	0.12969	0.083662	0.180695
ADAM12	4.30602	3.95295	3.53461	3.95515	3.94078	4.57333	ADAM12	0.241178	0.324061	0.299027	0.286709	0.300955	0.237656	ADAM12	4.59373	4.46089	4.84298	4.64738	4.42397	4.81022	ADAM12	33.524	33.7636	34.3228	31.2346	34.565	37.6455
ADAM15	52.9179	58.0889	53.1711	53.6186	56.1128	56.8202	ADAM15	87.5797	87.3388	84.8782	88.8201	81.7154	82.6202	ADAM15	42.2489	44.0084	44.1111	41.5811	43.6487	43.4219	ADAM15	30.713	29.4527	30.4308	28.2567	29.8981	30.4084
ADAM15-EFNA4	0	0	0	0.127728	0	0	ADAM15-EFNA4	0	0	0	0	0	0
ADAM17	34.3903	32.8096	32.911	36.6549	37.3467	34.6045	ADAM17	27.6884	28.2553	27.1846	27.9003	27.4446	26.7476	ADAM17	47.2702	48.5432	47.6251	48.8167	49.5067	48.4607	ADAM17	32.3295	30.9833	33.0285	29.1109	31.6635	33.5217
ADAM18	0	0	0	0	0	0	ADAM18	0	0	0.028791	0	0	0								LOC103288285	0	0	0.063269	0	0	0.039621
ADAM19	10.3392	9.09776	9.36607	11.3385	11.0072	10.5406	ADAM19	5.69358	4.9048	4.97322	4.76075	4.87687	4.61423	ADAM19	12.928	13.2077	13.9773	13.041	13.8	13.4333	ADAM19	41.0196	37.6592	40.3355	34.4733	41.012	44.2201
ADAM2	0	0	0	0	0	0	ADAM2	0	0	0	0	0	0	ADAM2	0	0	0	0	0	0	LOC103288286	0	0	0	0	0	0.018412
ADAM20	0.025995	0.020249	0.010127	0.00861	0.024251	0.010484	ADAM20	0.017255	0.005684	0.006459	0.008273	0.011532	0.01219	LOC102894331	0	0	0	0	0	0	LOC103283897	0.016088	0	0.016568	0	0	0
ADAM20	0.025995	0.020249	0.010127	0.00861	0.024251	0.010484	ADAM20	0.017255	0.005684	0.006459	0.008273	0.011532	0.01219	LOC102898230	0	0	0	0	0	0	LOC103283897	0.016088	0	0.016568	0	0	0
ADAM20	0.025995	0.020249	0.010127	0.00861	0.024251	0.010484	ADAM20	0.017255	0.005684	0.006459	0.008273	0.011532	0.01219	LOC107196626	0	0	0	0	0	0	LOC103283897	0.016088	0	0.016568	0	0	0
ADAM20P1	0.021747	0	0.053676	0	0.038745	0.018767	ADAM20P1	0.112855	0	0.056397	0	0.0344	0.030278
ADAM21	0	0.111707	0.020696	0.066651	0.156891	0.086843	ADAM21	0.01864	0	0.021729	0.052184	0.019882	0.035								ADAM21	0	0	0	0	0	0
ADAM21P1	0.033249	0.024595	0	0	0	0	ADAM21P1	0	0.023799	0	0	0	0
ADAM22	1.99771	1.57024	1.74135	1.7611	1.55853	1.72904	ADAM22	0.237239	0.380531	0.291338	0.231266	0.360497	0.432945	ADAM22	0.375528	0.431677	0.360453	0.282712	0.357047	0.23022	ADAM22	1.90856	1.58324	1.78987	1.45716	1.76141	1.88725
ADAM23	2.8925	2.74711	2.44525	2.30336	2.46119	2.91295	ADAM23	0	0.007269	0	0	0	0	ADAM23	0	0	0	0	0	0.025125	ADAM23	0	0	0	0	0	0
ADAM28	0.413206	0.50633	0.559018	0.771078	0.691513	0.727535	ADAM28	1.68637	1.91391	1.73887	2.16736	2.09814	2.11825	ADAM28	0.060347	0.068361	0.063241	0.066725	0.083211	0.080773	ADAM28	0.019536	0	0.020103	0.048783	0	0.018886
ADAM29	0	0	0	0.019796	0.039935	0	ADAM29	0	0	0.017661	0	0	0	LOC102883881	0	0	0	0	0	0	ADAM29	0	0	0	0	0	0
ADAM30	0	0	0	0	0	0	ADAM30	0	0	0	0	0	0	ADAM30	0.026767	0	0.055974	0	0.022067	0.026806	LOC103291358	0	0.082398	0.059325	0.108109	0	0.095047
ADAM30	0	0	0	0	0	0	ADAM30	0	0	0	0	0	0	ADAM30	0.026767	0	0.055974	0	0.022067	0.026806	LOC103304930	0	0	0	0	0	0
ADAM30	0	0	0	0	0	0	ADAM30	0	0	0	0	0	0	ADAM30	0.026767	0	0.055974	0	0.022067	0.026806	LOC129147924	0.03789	0.022265	0.038995	0	0.178087	0.036636
ADAM32	0.405455	0.115974	0.276457	0.498424	0.60781	0.172359	ADAM32	0.123821	0	0.064273	0.184765	0.091673	0.040335	LOC102879427	0	0	0	0	0	0.024664	LOC103290325	0.020275	0	0	0	0	0
ADAM32-2	0.070066	0.349449	0.213422	0.123073	0	0.278626	ADAM32-2	0.018821	0.096498	0.04681	0.055785	0.088113	0.089651
ADAM33	0	0.043333	0	0	0	0	ADAM33	0	0	0	0	0	0	ADAM33	0.020425	0	0.107008	0	0	0.041002	ADAM33	0.120551	0.070826	0	0.100337	0.026973	0
ADAM3A	0.110705	0.118211	0.159257	0.09769	0.147849	0.172667	ADAM3A	0	0	0	0	0	0
ADAM3B	0	0	0	0	0	0	ADAM3B	0	0	0	0	0	0
ADAM5	0	0	0	0	0	0	ADAM5	0	0	0	0	0	0
ADAM6	0	0	0	0	0	0	ADAM6	0	0	0	0	0	0
ADAM7	0	0	0	0	0	0	ADAM7	0.057774	0.084022	0.134756	0.141611	0.107878	0.217033	ADAM7	0	0	0	0	0	0	ADAM7	0	0.023943	0.020965	0	0	0.019693
ADAM7-AS1	0	0.065377	0	0	0	0	ADAM7-AS1	0	0	0	0	0	0
ADAM7-AS2	0	0	0	0	0	0	ADAM7-AS2	0	0	0	0	0.063037	0
ADAM8	0.613264	0.815091	0.774449	0.667561	0.811763	0.930938	ADAM8	1.12905	0.729294	0.671862	0.973048	1.04038	0.996703	ADAM8	0.019017	0.032312	0.019937	0	0	0.057294	ADAM8	49.2529	43.3009	45.546	40.4609	45.8088	45.0354
ADAM9	263.771	254.925	246.593	262.746	254.347	252.397	ADAM9	312.17	297.447	303.536	308.778	311.596	302.537	ADAM9	185.45	179.695	160.721	161.294	172.555	180.062	ADAM9	144.347	148.813	160.976	131.546	155.072	158.181
ADAMDEC1	0	0	0	0	0	0	ADAMDEC1	0	0	0	0	0	0	ADAMDEC1	0.133858	0.256051	0.314191	0.329424	0.109964	0.133737	ADAMDEC1	0	0	0	0	0	0
ADAMTS1	0.099146	0.06418	0.071469	0.076729	0.099445	0.032117	ADAMTS1	205.202	196.683	200.112	199.331	200.191	197.637	ADAMTS1	11.9633	11.0558	9.62648	9.62144	9.70785	11.263	ADAMTS1	81.7767	74.2696	83.895	76.8182	78.5021	86.538
ADAMTS10	13.5424	12.4557	14.2163	13.9347	16.5587	15.9993	ADAMTS10	0	0	0	0	0	0	ADAMTS10	0.322852	0.302992	0.223473	0.312972	0.205106	0.368271	ADAMTS10	0.173043	0.29862	0.214056	0.187366	0.232824	0.234813
ADAMTS12	2.73859	3.8439	2.7418	2.49703	2.17904	3.19918	ADAMTS12	19.5686	20.2985	22.7459	20.7081	21.1707	18.6421	ADAMTS12	26.9938	23.8918	26.2214	26.7487	26.8761	26.6658	ADAMTS12	29.4998	27.4597	31.2511	24.9843	32.2751	34.8269
ADAMTS13	0.481311	0.375523	0.307838	0.341112	0.853415	0.664808	ADAMTS13	0.793624	0.56118	0.441852	0.979198	0.572031	0.594205	ADAMTS13	0	0	0.02672	0	0.010562	0	ADAMTS13	1.38109	1.09164	1.17964	1.21053	1.23459	1.24923
ADAMTS13-2	0.106222	0.101046	0	0	0	0	ADAMTS13-2	0	0	0	0.069106	0	0
ADAMTS14	0.015986	0	0.013163	0	0.014248	0.049806	ADAMTS14	1.48394	1.0503	0.954628	1.1281	1.28121	0.990018	ADAMTS14	0.210129	0.226896	0.226666	0.109245	0.17496	0.250432	ADAMTS14	0.629786	0.559427	0.410605	0.288258	0.534516	0.48564
ADAMTS15	3.55392	3.25902	3.36697	3.05941	3.45372	3.12579	ADAMTS15	0.490651	0.399202	0.323233	0.277356	0.278783	0.29743	ADAMTS15	1.38327	1.175	1.65642	1.48013	1.2142	1.47231	ADAMTS15	0.05238	0.030808	0.080965	0.065432	0.158505	0.012686
ADAMTS16	0.451652	0.659563	0.54283	0.97911	0.771789	0.714298	ADAMTS16	0.043603	0.028183	0.01695	0.020357	0.031016	0.009275	ADAMTS16	0	0	0	0	0	0	ADAMTS16	0.076323	0.074822	0.091766	0.095345	0.102659	0.123246
ADAMTS16-DT	0.088629	0.032777	0.036342	0	0.078792	0.038147	ADAMTS16-DT	0	0.031597	0	0	0	0
ADAMTS17	0.060528	0.022503	0.016627	0.017839	0.012191	0.069661	ADAMTS17	0.133961	0.021732	0.047876	0.01396	0.056678	0.059374	ADAMTS17	4.08759	3.86414	3.92457	3.66638	3.8066	3.79809	ADAMTS17	0.041742	0.032731	0.057343	0.086901	0.037419	0
ADAMTS18	0.074151	0.021943	0.03664	0.026224	0.013219	0.012808	ADAMTS18	0.011016	0	0.012852	0	0	0	ADAMTS18	0.128877	0.10943	0.099432	0.05754	0.121582	0.121248	ADAMTS18	0	0	0.015366	0.018632	0.040106	0
ADAMTS19	0.054357	0.005222	0	0	0	0	ADAMTS19	0	0.010387	0.036669	0	0.022532	0.015091	ADAMTS19	0.027789	0	0	0	0	0	ADAMTS19	0.049855	0.058652	0.077074	0.093424	0.016766	0.048308
ADAMTS19-AS1	0	0	0	0	0	0	ADAMTS19-AS1	0	0	0	0	0	0
ADAMTS2	0.177064	0.087281	0.072652	0.133123	0.26849	0.152447	ADAMTS2	0.021797	0	0	0	0.023256	0.062106	ADAMTS2	0	0	0.016284	0.051658	0.025734	0	ADAMTS2	0.076021	0.074538	0.02611	0.031663	0.034074	0.049104
ADAMTS20	0.008201	0	0	0	0.03579	0	ADAMTS20	0	0	0.00871	0	0	0	ADAMTS20	0.017275	0	0.018175	0.009641	0.01438	0.008707	ADAMTS20	1.314	0.952681	1.29772	1.0318	1.06822	1.00296
ADAMTS3	0.010926	0	0	0	0	0.01888	ADAMTS3	11.5167	11.2288	12.3846	11.4158	12.2479	10.7812	ADAMTS3	5.15379	4.83068	5.07534	4.93205	5.33634	5.20303	ADAMTS3	1.49146	1.43448	1.51296	1.41967	1.54474	1.58314
ADAMTS4	0.028693	0.036094	0.02039	0.017849	0.041635	0.033126	ADAMTS4	0.033754	0.050421	0.067285	0.007421	0.01651	0.025077	ADAMTS4	0.030519	0.155533	0.032035	0.088862	0.148739	0.046034	ADAMTS4	0.174293	0.386888	0.358716	0.411047	0.286034	0.337002
ADAMTS5	0	0	0	0	0	0	ADAMTS5	1.76013	1.57004	1.64998	1.38502	1.39434	1.44221	ADAMTS5	0.049281	0.094141	0.006486	0.062008	0.061614	0.062149	ADAMTS5	2.65007	2.02474	2.45984	1.83886	2.37098	2.66821
ADAMTS6	0.056563	0.104881	0.085466	0.264847	0.212602	0.29186	ADAMTS6	0.096344	0.088458	0.157812	0.105746	0.124459	0.107652	ADAMTS6	0.418945	0.464302	0.385025	0.33062	0.430117	0.46324	ADAMTS6	2.082	2.21966	2.23705	1.80334	2.55887	2.45619
ADAMTS7	3.07364	2.68809	2.7464	3.2295	2.79574	3.20928	ADAMTS7	4.60146	3.49558	4.11848	3.28383	3.61534	3.91412	ADAMTS7	21.2552	21.6057	20.2822	19.1502	21.2034	20.0536	ADAMTS7	17.4823	16.0509	18.1303	14.6453	20.201	20.3418
ADAMTS7P1	0.039861	0.03998	0.044863	0.011848	0.011851	0.011574	ADAMTS7P1	0.009785	0.029033	0.023335	0	0.042557	0.018872
ADAMTS8	0.383203	0.391482	0.360493	0.381622	0.325212	0.186406	ADAMTS8	0	0	0.015794	0	0.0289	0	ADAMTS8	0.411358	0.427209	0.406752	0.428608	0.226553	0.366703	ADAMTS8	0	0.016953	0	0	0	0.027917
ADAMTS9	5.68196	5.84881	4.56208	5.19118	6.55043	5.70832	ADAMTS9	44.0872	41.7934	43.5089	42.5479	46.4168	39.368	ADAMTS9	40.3666	35.7909	35.6035	34.5196	36.261	37.4047	ADAMTS9	0	0	0	0	0	0
ADAMTS9-AS1	0	0	0	0	0	0	ADAMTS9-AS1	0.013115	0	0	0	0	0
ADAMTS9-AS2	0.060727	0.112303	0.074851	0.026783	0.027027	0.026178	ADAMTS9-AS2	1.14515	1.37084	1.75312	1.57076	1.53243	1.45417
ADAMTSL1	0.028472	0.007021	0.158884	0.109885	0.025392	0.035518	ADAMTSL1	0.855262	0.865821	0.806428	0.61258	0.952484	0.996158	ADAMTSL1	0.339854	0.294124	0.340425	0.333346	0.379087	0.434897	ADAMTSL1	20.1074	20.6567	20.9275	17.9563	22.619	22.9787
ADAMTSL2	0.036889	0	0	0	0	0	ADAMTSL2	0	0	0	0.016608	0	0.034168	ADAMTSL2	0.019214	0	0	0	0.015904	0.019295	ADAMTSL2	0.331214	0.287918	0.459896	0.503642	0.406584	0.488068
ADAMTSL3	1.15783	0.891692	0.993276	1.69628	1.12722	1.37637	ADAMTSL3	30.3331	27.8206	27.9764	26.9725	30.8731	27.8247	ADAMTSL3	0.234574	0.128496	0.294662	0.152158	0.207974	0.152606	ADAMTSL3	0	0.009279	0	0	0	0
ADAMTSL4	0.453994	0.489429	0.322276	0.405193	0.57627	0.595444	ADAMTSL4	2.65428	2.63938	2.421	2.51411	2.90035	2.37942	ADAMTSL4	2.40052	2.31927	2.17593	1.50319	1.96189	2.18612	ADAMTSL4	0.91138	0.713979	0.821885	0.719501	0.758044	0.943319
ADAMTSL4-AS1	0.21136	0.053916	0.119427	0.104132	0.307775	0.318468	ADAMTSL4-AS1	0	0.180878	0.061956	0.148856	0	0.10016
ADAMTSL4-AS2	0	0	0	0	0.249585	0	ADAMTSL4-AS2	0	0	0	0.188112	0.209679	0
ADAMTSL5	2.95592	2.54861	2.7806	3.07855	3.21545	2.69441	ADAMTSL5	8.1829	8.36172	8.17507	7.63993	7.4006	7.20162	ADAMTSL5	7.23175	6.94802	7.74045	5.95819	7.69652	6.84935	ADAMTSL5	16.6812	16.141	15.9115	15.3313	15.4473	16.6875
ADAP1	2.37681	2.3937	2.89689	2.12303	2.06535	2.27179	ADAP1	15.383	16.33	15.9516	15.2338	15.365	15.1992	ADAP1	15.2558	16.0616	17.6098	15.9392	15.9266	16.7975	ADAP1	15.1064	14.1713	14.3447	13.668	14.1919	15.1871
ADAP2	1.75722	1.71587	1.77224	1.21126	1.43782	1.44771	ADAP2	2.2068	2.57422	2.8375	2.89307	2.58691	2.73374	ADAP2	5.14839	5.78877	5.99837	5.32266	5.13841	5.74248	ADAP2	0.689449	0.916454	0.716144	0.963456	0.788665	0.618406
ADAR	98.7971	96.1085	91.7906	325.54	318.685	325.685	ADAR	95.0913	87.9303	93.0402	152.119	148.327	149.929	ADAR	20.5512	20.1701	19.6	40.7529	45.1456	37.3136	ADAR	27.4898	24.455	28.4025	27.4788	36.2917	38.1992
ADARB1	2.66939	3.11571	2.44613	2.73918	2.60476	3.20809	ADARB1	5.51756	3.9396	3.9522	4.03783	4.10859	3.90557								ADARB1	1.64754	1.75479	1.42997	1.51134	1.71214	1.65814
ADARB2	0.007489	0	0.018481	0	0	0	ADARB2	0	0	0	0	0	0	ADARB1	16.8912	16.9955	16.8694	16.0292	16.3828	17.805	ADARB2	0	0	0	0	0	0
ADARB2-AS1	0	0	0	0	0	0	ADARB2-AS1	0	0	0	0	0	0
ADAT1	23.1834	22.1759	21.6946	23.8522	23.1516	23.9716	ADAT1	18.2058	18.1484	18.4339	17.1281	17.6454	15.8337	ADAT1	10.1072	8.67191	9.5188	9.59179	9.47301	9.62808	ADAT1	4.42779	4.04786	3.91933	3.01977	4.96017	4.07744
ADAT2	1.25359	1.40743	1.26563	1.08685	1.6742	1.39497	ADAT2	1.80048	2.38085	2.3765	1.96586	1.92219	1.80164	ADAT2	10.1715	9.79338	9.60777	11.1133	11.0892	9.48627	ADAT2	11.6541	9.33498	13.5272	11.343	13.252	12.2948
ADAT3	8.86181	6.97753	8.00663	7.57986	6.42322	7.47777	ADAT3	11.2103	11.1236	11.4123	11.6647	11.8427	11.892	ADAT3	10.3623	10.8611	8.76546	9.5159	10.3891	10.343	ADAT3	4.2286	4.23686	3.56766	3.23038	3.60107	4.20084
ADCK1	6.95317	7.37295	7.57308	7.31403	7.32944	6.95416	ADCK1	4.70453	5.43943	5.29076	5.69254	4.45696	5.14601	ADCK1	3.40142	3.53589	3.57875	3.36818	3.49298	3.60563	ADCK1	7.45552	8.0418	7.4074	7.08931	7.43283	7.96483
ADCK1	6.95317	7.37295	7.57308	7.31403	7.32944	6.95416	ADCK1	4.70453	5.43943	5.29076	5.69254	4.45696	5.14601	ADCK1	3.40142	3.53589	3.57875	3.36818	3.49298	3.60563	LOC129147161	0.279089	0.826416	0.38388	0.579773	0.557324	0.477671
ADCK2	25.0788	25.397	25.1714	22.2192	22.8617	22.4385	ADCK2	19.8734	20.4	19.3427	18.4433	17.9359	19.6913	ADCK2	14.909	16.1425	13.7022	15.098	13.844	15.0238	ADCK2	43.6727	41.5585	43.204	40.066	43.1574	41.6107
ADCK5	7.41516	8.67376	8.27731	7.71162	9.48522	8.12968	ADCK5	16.4223	16.1221	13.9245	18.0042	15.584	14.9409	ADCK5	7.82742	7.11818	7.08385	6.83018	6.68419	7.04463	ADCK5	21.0936	19.9665	21.134	17.2552	18.3344	19.6474
ADCK5-2	0	0	0	0	0	0	ADCK5-2	0	0	0	0	0	0.106008
ADCY1	5.08107	5.9802	5.72101	5.77784	5.63342	5.85739	ADCY1	0	0.003911	0.010295	0	0	0	ADCY1	0.343318	0.243055	0.239938	0.21107	0.126307	0.268155	ADCY1	1.71753	1.87268	1.9282	1.48288	1.89675	1.96133
ADCY10	0.023387	0.0367	0.011243	0.032763	0.073949	0.028657	ADCY10	0.058743	0.083635	0.040581	0.017262	0.0418	0.024506	ADCY10	0.009329	0.007921	0	0.020812	0.007762	0	ADCY10	0	0	0.008789	0	0	0
ADCY10P1	0.042477	0.073282	0.02328	0.024993	0.019188	0.012326	ADCY10P1	0.147192	0.091713	0.245106	0.15549	0.211655	0.197227
ADCY2	0.048985	0.014496	0	0	0	0	ADCY2	0.007288	0	0	0	0	0.006848	ADCY2	26.9121	25.5673	25.3365	24.8552	24.0618	25.4117	ADCY2	15.699	13.9178	13.659	13.2514	12.826	14.4242
ADCY3	33.1162	33.9483	34.3601	32.8934	34.0976	34.7066	ADCY3	15.2985	14.6513	16.2262	15.7406	15.4544	13.6473	ADCY3	32.3338	31.4421	33.3186	30.2434	32.0136	31.132	ADCY3	0.273562	0.279877	0.318756	0.222891	0.41604	0.265121
ADCY4	0	0	0.015835	0	0	0	ADCY4	0.014274	0	0	0	0	0	ADCY4	0	0	0	0	0.013933	0.033793	ADCY4	0	0	0.011657	0	0.015215	0.032882
ADCY5	0.489123	0.553441	0.616531	0.347931	0.427646	0.513818	ADCY5	2.98174	2.78065	2.86918	3.10534	2.87622	2.67987	ADCY5	0.102101	0.161053	0.183928	0.129604	0.13313	0.13204	ADCY5	0	0	0	0	0	0
ADCY6	17.7421	15.9782	17.3041	15.54	16.4119	17.6346	ADCY6	40.7842	37.7012	39.7011	41.4785	39.5343	38.9665	ADCY6	17.96	15.5498	16.8608	15.6733	16.8006	16.6437	ADCY6	35.0504	31.6783	35.2071	30.3986	32.9358	33.2542
ADCY6-DT	3.21829	4.12572	2.8226	3.50013	3.72381	3.89545	ADCY6-DT	1.02137	1.6302	1.73948	3.03669	0.538417	2.10758
ADCY7	10.6059	10.4126	9.51503	10.7694	12.1846	12.1323	ADCY7	8.32646	8.1869	8.74351	8.1317	9.02818	7.57761	ADCY7	1.92144	1.78437	1.89675	1.57455	1.89654	2.03193	ADCY7	16.1684	14.9595	16.1023	13.5149	16.7339	16.7418
ADCY8	0.025301	0.034824	0	0.066048	0	0	ADCY8	0	0	0	0	0	0	ADCY8	0.013092	0	0	0	0.013761	0	ADCY8	0	0	0.012796	0	0	0
ADCY9	13.8347	11.761	13.2442	12.7809	10.8283	13.3496	ADCY9	6.90625	6.37076	6.6026	5.93269	6.40974	6.12034	ADCY9	7.76639	7.32461	8.02572	7.97258	8.18023	7.68963	ADCY9	10.3982	9.53605	10.6915	9.49352	10.2231	10.9618
ADCYAP1	0	0	0	0.037689	0.019006	0	ADCYAP1	0	0	0	0	0	0	ADCYAP1	0	0.1523	0.177747	0.175543	0	0	ADCYAP1	0	0	0	0	0	0
ADCYAP1R1	0.009858	0	0.008124	0.008722	0.008791	0	ADCYAP1R1	0.007333	0.007114	0	0.010281	0	0	ADCYAP1R1	32.1338	28.1554	29.9237	29.8703	28.4632	29.3058	ADCYAP1R1	0.038347	0	0	0	0	0
ADD1	69.2085	65.0197	64.3492	67.1223	67.4207	66.1672	ADD1	132.263	130.446	134.603	127.743	128.787	127.244	ADD1	622.057	597.73	598.129	603.02	598.685	590.437	ADD1	138.117	136.626	141.838	131.37	144.034	144.161
ADD2	16.5127	17.4846	15.6589	16.7685	16.9834	15.9819	ADD2	1.58297	1.63136	1.42057	1.10077	1.54244	1.51938	ADD2	0.007298	0.018588	0.030725	0.073412	0.048635	0.066278	ADD2	0.108452	0.191213	0.074424	0.090281	0.097114	0.104893
ADD3	9.26771	9.24315	8.83859	8.85182	9.58647	10.4379	ADD3	49.3646	48.3292	49.6053	48.0741	50.4305	48.085	ADD3	14.7179	15.5832	14.1675	14.0694	14.0606	15.4681	ADD3	25.3808	26.0377	29.0043	23.6653	27.2465	27.1874
ADD3-AS1	0.113273	0.083776	0.046366	0	0.050294	0	ADD3-AS1	0.207837	0.080421	0.193393	0.290021	0.265588	0.194797
ADGB	0	0	0	0	0	0	ADGB	0	0	0.010468	0.012575	0	0	ADGB	0.161232	0.200813	0.146903	0.179646	0.134057	0.216529	ADGB	0	0	0	0.011759	0	0.008913
ADGB-DT	0	0	0	0	0	0	ADGB-DT	0	0	0	0	0	0
ADGRA1	0.121492	0.101115	0.050025	0.080558	0.082888	0.091804	ADGRA1	0	0	0	0	0	0	ADGRA1	0	0	0	0.042713	0	0	ADGRA1	0	0.068274	0	0	0.038965	0.028037
ADGRA1-AS1	0	0	0	0	0	0	ADGRA1-AS1	0	0	0	0	0	0
ADGRA2	2.09983	2.19057	2.06948	2.18122	2.47619	2.40467	ADGRA2	0	0.026815	0.015915	0.019377	0.029508	0.012986	ADGRA2	0.897079	1.01867	0.93224	0.825411	0.962869	0.819604	ADGRA2	1.39493	1.47032	1.42231	1.28717	1.5181	1.59753
ADGRA3	23.8374	22.8634	22.9173	16.3022	17.6798	17.6395	ADGRA3	26.3625	26.9636	27.2617	25.3415	24.2265	24.4611	ADGRA3	14.9288	13.6227	14.1444	14.5218	14.1822	14.0833	ADGRA3	40.1679	40.8529	43.3313	38.1898	42.7336	44.6126
ADGRB1	0.239004	0.165426	0.175393	0.249774	0.313166	0.216714	ADGRB1	0.01769	0.066953	0.020624	0	0	0	ADGRB1	0.021173	0.05394	0.055651	0	0.035212	0.042655	ADGRB1	0.54749	0.576335	0.413364	0.403135	0.580298	0.4558
ADGRB2	7.17052	6.86098	6.6844	6.81033	6.79608	6.79585	ADGRB2	0.051199	0.029794	0.071682	0.043052	0.032788	0	ADGRB2	5.66082	5.96962	5.9476	5.54221	5.44458	5.8891	ADGRB2	5.77756	5.93877	5.77976	4.90068	5.4762	5.79882
ADGRB3	0	0	0	0.00928	0	0	ADGRB3	0	0.007568	0	0.021874	0.033313	0	ADGRB3	0.011545	0.009805	0	0	0	0.009716	ADGRB3	1.18772	1.05133	1.27681	0.900577	1.32535	1.03361
ADGRB3-DT	0	0	0	0	0	0	ADGRB3-DT	0	0	0	0	0	0
ADGRD1	0.276406	0.22105	0.201493	0.1717	0.395961	0.227921	ADGRD1	0.012824	0	0	0	0	0	ADGRD1	0.039051	0.082941	0.122794	0.107997	0.032317	0.019605	ADGRD1	0.542935	0.39745	0.385504	0.482328	0.519387	0.51445
ADGRD1-AS1	1.1613	1.51995	1.17034	1.49287	0.818101	1.67043	ADGRD1-AS1	0	0	0	0	0	0
ADGRD2	0	0	0	0	0	0	ADGRD2	0	0	0	0	0	0								ADGRD2	0	0	0	0	0	0
ADGRE1	10.5774	8.66631	11.0035	20.6358	18.2744	22.1189	ADGRE1	0	0	0	0.026804	0	0	ADGRE1	0	0	0	0	0	0	ADGRE1	0	0	0	0	0	0
ADGRE2	0.872755	0.636602	0.992603	0.326128	0.51772	0.434454	ADGRE2	0.437189	0.216595	0.427446	0.630013	0.475504	0.4811	LOC102887688	0	0	0	0	0	0	LOC103301043	0	0	0	0	0	0
ADGRE2	0.872755	0.636602	0.992603	0.326128	0.51772	0.434454	ADGRE2	0.437189	0.216595	0.427446	0.630013	0.475504	0.4811	LOC102887688	0	0	0	0	0	0	LOC103304566	0	0.022933	0.020173	0.048704	0	0.018919
ADGRE2	0.872755	0.636602	0.992603	0.326128	0.51772	0.434454	ADGRE2	0.437189	0.216595	0.427446	0.630013	0.475504	0.4811	LOC102887688	0	0	0	0	0	0	LOC114229663	0.650315	0.763474	0.710463	0.465179	0.581804	0.673507
ADGRE2	0.872755	0.636602	0.992603	0.326128	0.51772	0.434454	ADGRE2	0.437189	0.216595	0.427446	0.630013	0.475504	0.4811	LOC102887688	0	0	0	0	0	0	LOC114229942	0.425324	0.145577	0.138005	0.409362	0.269363	0.367451
ADGRE2	0.872755	0.636602	0.992603	0.326128	0.51772	0.434454	ADGRE2	0.437189	0.216595	0.427446	0.630013	0.475504	0.4811	LOC102887688	0	0	0	0	0	0	LOC129149287	0.100223	0.075311	0.046628	0.098894	0.128944	0.049267
ADGRE2	0.872755	0.636602	0.992603	0.326128	0.51772	0.434454	ADGRE2	0.437189	0.216595	0.427446	0.630013	0.475504	0.4811	LOC102895024	0	0	0	0	0	0	LOC103301043	0	0	0	0	0	0
ADGRE2	0.872755	0.636602	0.992603	0.326128	0.51772	0.434454	ADGRE2	0.437189	0.216595	0.427446	0.630013	0.475504	0.4811	LOC102895024	0	0	0	0	0	0	LOC103304566	0	0.022933	0.020173	0.048704	0	0.018919
ADGRE2	0.872755	0.636602	0.992603	0.326128	0.51772	0.434454	ADGRE2	0.437189	0.216595	0.427446	0.630013	0.475504	0.4811	LOC102895024	0	0	0	0	0	0	LOC114229663	0.650315	0.763474	0.710463	0.465179	0.581804	0.673507
ADGRE2	0.872755	0.636602	0.992603	0.326128	0.51772	0.434454	ADGRE2	0.437189	0.216595	0.427446	0.630013	0.475504	0.4811	LOC102895024	0	0	0	0	0	0	LOC114229942	0.425324	0.145577	0.138005	0.409362	0.269363	0.367451
ADGRE2	0.872755	0.636602	0.992603	0.326128	0.51772	0.434454	ADGRE2	0.437189	0.216595	0.427446	0.630013	0.475504	0.4811	LOC102895024	0	0	0	0	0	0	LOC129149287	0.100223	0.075311	0.046628	0.098894	0.128944	0.049267
ADGRE3	0	0	0	0	0	0	ADGRE3	0	0	0	0	0	0	ADGRE3	0	0.025846	0	0	0	0	ADGRE3	0	0	0.024021	0	0.031338	0
ADGRE4P	0	0.01126	0.0127	0.012644	0.012789	0.024816	ADGRE4P	0	0	0.037535	0	0.011631	0.030177
ADGRE5	44.5846	44.296	43.927	40.6897	39.6273	42.3564	ADGRE5	41.5632	37.615	39.3088	37.3008	37.0522	36.5958	ADGRE5	54.5623	55.6388	55.4642	53.0408	51.1593	52.6786	ADGRE5	12.6774	12.6055	12.404	11.7112	12.0886	11.1246
ADGRF1	0.0507	0.057642	0	0	0.012136	0.09081	ADGRF1	58.1781	56.001	56.1308	58.386	55.3823	57.0452	ADGRF1	1.09906	1.42427	1.13281	1.50541	1.14135	1.45938	ADGRF1	414.001	416.006	422.215	389.574	422.813	413.685
ADGRF2	0.012696	0.028463	0.010546	0.011228	0.011319	0	ADGRF2	0.009437	0.027459	0.011011	0	0	0.025669	ADGRF2	0.027696	0.070616	0.028949	0	0.045642	0.055455	LOC103296660	0	0	0	0	0	0
ADGRF3	0.268984	0.284459	0.355639	0.302335	0.269882	0.304962	ADGRF3	0.267808	0.177765	0.267689	0.295975	0.257499	0.186025	ADGRF3	0.059585	0	0.041631	0	0.065736	0.01994	ADGRF3	0.126914	0.167881	0.228731	0.099065	0.213209	0.199612
ADGRF4	5.49457	4.87346	4.52101	6.40942	7.33309	6.68696	ADGRF4	0.273503	0.33293	0.262638	0.180231	0.154478	0.271935	ADGRF4	0	0	0	0	0	0	ADGRF4	0	0	0	0	0	0
ADGRF5	0	0	0	0.010237	0	0	ADGRF5	0.025815	0.050083	0.040166	0.023512	0.018371	0.01617	ADGRF5	0	0	0	0	0	0.013179	ADGRF5	13.9152	14.7832	15.7865	13.7737	17.6937	15.7717
ADGRF5-AS1	0	0	0	0	0	0	ADGRF5-AS1	0	0	0	0	0	0
ADGRG1	120.07	117.477	108.873	110.546	104.415	103.865	ADGRG1	225.573	211.924	216.021	205.384	203.576	207.794	ADGRG1	77.4853	73.2032	78.6187	76.4618	74.5215	75.6439	ADGRG1	386.253	401.931	380.332	364.393	383.08	389.556
ADGRG2	6.72858	6.75999	5.99508	7.3082	6.46321	6.47419	ADGRG2	0	0.010546	0.012686	0.015238	0	0	ADGRG2	0.068956	0.07028	0.072418	0.061312	0.080137	0.069379
ADGRG3	0.069008	0.12735	0.094658	0.120662	0.161532	0.096969	ADGRG3	0	0	0.023592	0	0	0	ADGRG3	0	0	0	0	0	0	ADGRG3	7.1005	6.27996	7.02852	6.51454	7.66461	7.75583
ADGRG4	0	0	0	0	0	0	ADGRG4	0	0.00629	0	0	0	0	ADGRG4	0	0	0	0	0	0	ADGRG2	2.23411	2.74621	2.64172	2.1464	2.75325	2.37846
ADGRG5	0	0.026857	0.016815	0.018051	0	0	ADGRG5	0	0	0.031386	0	0	0	ADGRG5	0	0.015016	0	0	0.014643	0	ADGRG5	0.028297	0	0.029062	0	0.075814	0.081831
ADGRG6	47.1956	45.2646	42.0005	48.6131	49.0595	46.2829	ADGRG6	8.46302	8.61872	9.22428	8.62172	9.07447	8.63179	ADGRG6	28.1347	26.179	28.1147	28.7211	29.3602	29.1041	ADGRG6	75.4545	69.2133	77.5796	67.8189	75.7316	78.9489
ADGRG7	0.029107	0	0	0.018595	0.045397	0.054505	ADGRG7	0	0	0	0	0	0	ADGRG7	0	0	0	0	0	0	ADGRG7	0	0	0	0	0	0
ADGRL1	8.092	7.30184	6.88864	6.99336	6.89625	7.33978	ADGRL1	6.39795	5.65538	6.28844	5.08153	5.52651	4.67752	ADGRL1	4.92634	5.10752	4.19976	4.31382	4.34393	4.75294	ADGRL1	4.76725	4.16325	4.71919	4.03913	4.5175	5.50834
ADGRL1-AS1	0.504853	0.424397	0.320904	0.445814	0.367924	0.594015	ADGRL1-AS1	0.493187	0.741252	0.277599	0.64383	0.653128	0.784951
ADGRL2	8.44498	8.46959	7.87221	7.82404	8.32339	8.06463	ADGRL2	35.9884	35.1613	36.5697	34.8711	35.2626	34.0858	ADGRL2	30.3125	27.9624	29.9996	28.8585	30.1893	30.8897	ADGRL2	24.3569	25.2253	26.8177	24.2965	26.8088	28.4451
ADGRL3	0.146462	0.126959	0.043461	0.105092	0.061217	0.097635	ADGRL3	0.018045	0.020491	0.021508	0.033784	0.016054	0.036254	ADGRL3	1.63082	1.22108	1.34371	1.08669	1.18564	1.13558	ADGRL3	15.4182	14.3116	15.9308	13.2221	15.7267	17.3366
ADGRL3-AS1	0	0	0	0	0	0	ADGRL3-AS1	0	0	0	0	0	0
ADGRL4	0	0	0	0.016322	0.016459	0	ADGRL4	79.2374	81.0283	81.0123	78.1423	77.4273	72.2629	ADGRL4	0	0	0	0	0	0	ADGRL4	0.235258	0.398174	0.363123	0.264435	0.289545	0.246374
ADGRV1	0.347216	0.278906	0.26711	0.320619	0.305351	0.350293	ADGRV1	0.004805	0.014141	0.026565	0.042103	0.019729	0.015807	ADGRV1	1.65653	1.44245	1.37173	1.21673	1.35875	1.41964	ADGRV1	0.307334	0.23774	0.365925	0.258129	0.322744	0.376339
ADH1A	0	0	0	0	0	0	ADH1A	0	0	0	0	0.039316	0	LOC102884464	0.985023	0.839367	0	0	0.55368	0
ADH1B	0.016901	0	0	0.014414	0	0	ADH1B	0	0	0.014485	0	0	0
ADH1C	1.17054	1.00316	1.12123	0.644116	0.868387	0.630592	ADH1C	1.03401	0.893927	1.15579	1.20458	1.51267	0.992201								LOC103299813	0.053627	0.031473	0	0	0	0.025859
ADH4	0.170551	0	0	0.060142	0.030401	0.058792	ADH4	0	0	0	0.03524	0.026864	0	ADH4	0.050892	0.173215	0.052778	0	0	0	LOC103287828	0	0.055309	0	0	0	0
ADH4	0.170551	0	0	0.060142	0.030401	0.058792	ADH4	0	0	0	0.03524	0.026864	0	ADH4	0.050892	0.173215	0.052778	0	0	0	LOC103287959	0	0	0.142791	0.057966	0	0
ADH5	74.722	78.4594	75.0532	79.7835	82.0222	76.4739	ADH5	127.711	136.267	130.782	135.258	136.445	135.657	ADH5	90.0513	98.9946	91.4145	95.4468	98.7087	93.72	LOC103287829	44.7417	47.5328	49.0721	47.6891	50.3446	44.2615
ADH6	0.615641	0.735611	0.545266	0.334481	0.485013	0.735382	ADH6	11.3792	13.0326	11.613	14.4135	14.4052	12.7905								LOC103287827	0.113298	0.149909	0.262629	0.141518	0.152334	0.19201
ADH7	0	0	0	0	0	0	ADH7	0	0	0	0	0	0								ADH7	0.358943	0.240801	0.368863	0.319947	0.378066	0.222623
ADHFE1	0.173417	0.051311	0.028483	0.030574	0.123443	0.089664	ADHFE1	2.22864	2.48209	2.38737	2.43606	2.57427	2.18743	ADHFE1	2.65198	2.37531	2.27219	2.23268	2.01542	2.24335
ADI1	90.0199	88.1325	89.855	83.8832	82.0366	83.4392	ADI1	92.3236	92.6524	90.2686	90.2378	89.2728	92.1988	ADI1	551.007	573.862	522.676	478.736	499.469	537.334	ADI1	50.959	49.9197	51.861	54.9636	49.0101	50.263
ADIG	0	0	0	0	0	0	ADIG	0	0	0	0	0	0	ADIG	10.6359	10.4887	10.7904	11.3611	11.4095	11.3142	ADIG	0	0	0.095495	0	0	0.267064
ADIPINT	0	0	0	0	0	0	ADIPINT	0	0	0	0	0	0
ADIPOQ	0.072022	0	0.048745	0.025754	0.012814	0.027751	ADIPOQ	0.021575	0.022631	0	0.015132	0.011304	0	ADIPOQ	0	0	0	0	0	0	ADIPOQ	0	0	0.019228	0	0	0
ADIPOQ-AS1	0	0	0.030193	0	0	0.015792	ADIPOQ-AS1	0.027149	0	0.015875	0.021086	0	0.014109
ADIPOR1	105.563	97.7955	96.2538	96.1376	94.978	101.266	ADIPOR1	87.7871	87.9399	91.3125	86.3689	87.2541	81.4185	ADIPOR1	76.0472	73.9481	77.1857	73.4306	77.2755	74.5475	ADIPOR1	112.81	108.333	108.941	109.933	109.301	109.448
ADIPOR2	73.4421	70.2986	68.7074	69.5634	67.4297	69.0357	ADIPOR2	62.8865	63.5395	63.0609	61.2283	60.9959	61.4129	ADIPOR2	80.8189	76.2457	79.9965	81.6491	81.3589	82.6323	ADIPOR2	49.0642	49.3421	50.008	46.1147	50.2829	50.4779
ADIRF	0	0	0	0	0	0	ADIRF	0.98911	1.05277	1.73071	1.78065	1.24527	1.4063	ADIRF	0	0	0	0	0	0.088715	ADIRF	51.2817	55.5178	53.7005	50.0414	60.0401	55.8949
ADIRF-AS1	0.871621	1.00361	0.627939	1.05678	1.00729	1.09206	ADIRF-AS1	0.638808	0.745546	0.63325	0.941316	0.528036	0.440353
ADISSP	153.393	156.977	153.627	140.646	144.992	141.193	ADISSP	74.4703	75.2069	71.9571	68.8626	67.749	72.6962
ADK	41.7848	43.0404	44.2163	42.0897	42.2095	38.4277	ADK	62.0673	63.658	62.6718	64.1119	61.3862	62.3024	ADK	32.492	29.1227	31.8567	31.1236	30.7155	30.403	ADK	18.0863	19.532	17.7403	17.457	20.537	18.4264
ADM	36.0377	40.876	38.6528	50.376	37.776	40.734	ADM	23.9471	25.0365	24.6214	23.4518	26.1456	24.1578	ADM	15.8147	15.9463	12.8568	16.0202	16.4705	14.5177	ADM	15.0155	13.9049	15.3149	17.9724	11.3929	14.241
ADM2	1.91818	2.16169	1.92534	2.55325	1.78477	1.69174	ADM2	18.8268	18.6979	19.7421	21.2223	21.9453	20.1	ADM2	0	0	0	0	0	0	ADM2	0	0	0	0	0	0
ADM5	4.32415	4.03457	4.35408	4.85104	3.27779	2.90604	ADM5	0.223705	0.215804	0	0.103588	0.31688	0.48804	ADM5	0	0.039964	0	0	0	0
ADNP	41.2309	38.7692	37.5159	41.2363	34.9644	36.6737	ADNP	33.8511	33.6793	35.1743	33.7011	33.5389	32.2737	ADNP	39.7408	36.0894	35.7495	36.9001	36.4715	38.7732	ADNP	38.6868	36.5012	41.2414	34.9298	40.8285	41.4054
ADNP-AS1	0.976804	1.3025	1.02186	1.41906	1.56624	1.15698	ADNP-AS1	2.43126	2.23383	2.0609	1.348	2.059	1.80422
ADNP2	16.7469	18.958	16.8824	16.1051	15.9182	15.6639	ADNP2	15.1443	15.7747	15.8626	15.3613	15.6015	14.1678	ADNP2	8.96828	9.06014	9.76797	8.69772	8.94792	8.94971	ADNP2	8.90042	9.04575	9.12622	8.15077	9.82416	8.95178
ADO	25.301	25.7671	24.8371	24.2441	23.3224	24.524	ADO	27.4372	25.0269	25.4611	24.9072	23.7905	23.8612	ADO	7.90663	7.53741	7.65953	7.80505	7.55513	7.55764	ADO	11.4229	11.0916	11.0805	11.8101	12.3713	13.2279
ADORA1	8.84828	8.87398	7.70217	6.60967	7.13474	6.79044	ADORA1	34.1271	34.0348	31.1226	36.0159	33.7003	33.7757	ADORA1	0	0	0	0	0	0	ADORA1	28.9797	27.942	27.7765	28.9524	27.101	28.5733
ADORA2A	0	0.05096	0.176447	0.140771	0	0	ADORA2A	0	0	0.023292	0	0	0	ADORA2A	0.045363	0.115493	0.142316	0.149977	0.168449	0.204484	ADORA2A	0.320518	0.242005	0.306134	0.171457	0.307123	0.265293
ADORA2A-AS1	0	0	0.082951	0	0	0	ADORA2A-AS1	0	0	0	0	0	0
ADORA2B	22.7619	22.8437	20.4546	18.651	16.0962	19.2936	ADORA2B	54.3028	54.5578	53.8549	48.9825	49.8049	47.2308	ADORA2B	0	0.069519	0.085059	0.088876	0.167224	0.203634	ADORA2B	0	0	0	0	0	0
ADORA3	0	0	0	0	0	0	ADORA3	0	0	0	0	0.04495	0	LOC102879018	0	0	0	0	0	0	ADORA3	0	0	0	0	0	0
ADPGK	49.491	51.1048	50.4599	51.2485	57.0523	54.7557	ADPGK	38.5269	36.8496	38.8302	38.4022	38.0146	38.9038	ADPGK	69.2627	68.3466	68.6774	65.8233	70.3613	68.2594	ADPGK	81.1922	85.1355	80.3534	69.8066	82.2951	78.0571
ADPGK-AS1	0	0	0	0	0	0	ADPGK-AS1	0	0.017481	0.021039	0	0	0
ADPRH	2.53229	2.2042	2.12297	2.77401	2.74294	2.95781	ADPRH	3.57638	3.34516	3.32881	3.07439	3.11686	2.93523	ADPRH	25.0855	26.301	26.4708	26.5466	27.0682	28.4475	ADPRH	24.9562	25.1507	27.6055	22.0531	26.981	28.9199
ADPRHL1	15.7662	15.0679	14.2601	12.3377	16.4543	15.0925	ADPRHL1	2.35309	2.43637	2.3982	2.40873	2.34696	1.85572
ADPRM	8.08877	8.19238	7.6494	8.21022	9.39593	6.21026	ADPRM	9.40597	7.89301	7.83734	8.5547	7.67869	9.10642	ADPRM	14.5442	12.4787	13.944	12.077	14.2027	14.5405	ADPRM	17.3667	18.5908	20.5855	16.7298	21.9695	21.4378
ADPRS	22.4129	21.1135	22.6535	27.0687	28.9584	28.8526	ADPRS	70.2368	70.9582	68.5687	84.0082	82.9492	88.8516	ADPRHL2	46.8618	46.1539	44.3937	42.8155	44.0048	43.1813	ADPRS	32.3432	33.0902	32.2116	30.0241	31.054	32.4086
ADRA1A	0.030363	0	0	0.008326	0.05591	0	ADRA1A	0	0.023464	0.016342	0.048681	0	0.013157	ADRA1A	0	0	0	0	0	0	ADRA1A	0.036642	0	0	0	0	0
ADRA1B	27.4967	21.6223	28.5971	24.3775	16.0508	20.1056	ADRA1B	31.8468	28.9214	32.9647	26.5088	27.3455	28.7768	ADRA1B	50.296	47.1494	51.4338	46.9034	45.839	44.3301	ADRA1B	1.48368	1.5515	1.13624	1.54834	1.08449	1.4308
ADRA1D	7.12398	7.08214	5.47229	4.82269	7.02639	6.32175	ADRA1D	0	0	0.038843	0	0	0	ADRA1D	0	0	0	0	0	0	ADRA1D	1.48574	1.17216	1.2543	1.10721	1.72571	1.62781
ADRA2A	0.03354	0.049625	0.013807	0.029645	0.014946	0.01448	ADRA2A	0	0	0	0	0	0.011694	ADRA2A	0.261036	0.263308	0.154073	0.108571	0.094673	0.262399	ADRA2A	12.1805	13.702	14.1889	12.9266	15.322	14.7775
ADRA2B	0.035289	0	0.043576	0	0	0.0457	ADRA2B	0	0	0.015275	0	0	0	ADRA2B	0	0.082241	0	0	0.039396	0	ADRA2B	0	0	0	0.135936	0.048583	0
ADRA2C	6.77694	7.35553	7.467	5.02703	5.89071	6.08756	ADRA2C	0.070229	0.06804	0.054554	0.032748	0	0.02197	ADRA2C	1.56171	1.9224	1.53943	1.83173	1.78219	1.67892	ADRA2C	5.63078	5.68804	5.27876	6.36291	4.56477	5.14476
ADRB1	0.39076	0.722676	0.696567	0.671081	0.483469	0.505817	ADRB1	0	0	0	0	0	0	ADRB1	0	0	0	0	0	0	ADRB1	5.08379	5.84343	6.03879	5.42237	5.63781	5.18192
ADRB2	0.203429	0.175557	0.167078	0.657594	0.42238	0.292196	ADRB2	5.10961	4.9739	4.98984	4.65909	4.94034	4.65386	ADRB2	0.200393	0.218989	0.119653	0.188609	0.070733	0.085953	ADRB2	2.17109	2.23788	2.38063	1.80644	2.1675	2.14225
ADRB3	0	0	0	0	0	0	ADRB3	0	0	0	0	0	0	ADRB3	0	0	0	0	0	0	ADRB3	0	0	0	0	0	0
ADRM1	177.994	176.071	186.727	185.833	166.349	167.778	ADRM1	175.798	165.737	171.829	154.23	153.062	159.762	ADRM1	110.237	109.626	120.359	107.965	110.254	106.953	ADRM1	107.354	107.319	110.734	106.482	109.52	110.117
ADSL	80.0825	86.5465	81.3765	75.7169	83.6633	79.2602	ADSL	89.8624	90.2713	88.9721	88.6264	92.5231	88.6625	ADSL	96.2161	91.5247	98.4193	94.9669	97.1045	96.5609	ADSL	39.7354	40.7932	41.5958	37.9395	42.4403	37.2459
ADSS1	10.6973	11.377	9.53379	7.95788	10.0129	9.26488	ADSS1	0.653847	1.52526	0.796001	1.15817	1.52869	0.999353	ADSSL1	7.60412	7.88246	6.6081	6.71526	7.22833	7.28059	ADSS1	156.334	149.437	149.92	150.839	149.997	149.688
ADSS1	10.6973	11.377	9.53379	7.95788	10.0129	9.26488	ADSS1	0.653847	1.52526	0.796001	1.15817	1.52869	0.999353	ADSSL1	7.60412	7.88246	6.6081	6.71526	7.22833	7.28059	ADSS2	45.5715	48.1683	47.1036	44.6569	49.0249	48.4728
ADSS2	62.9074	63.4497	63.7676	64.9195	68.2432	66.9345	ADSS2	93.3281	97.8186	98.358	98.7041	102.004	97.5245	ADSS	138.955	133.496	137.185	141.165	140.53	138.234	ADSS2	45.5715	48.1683	47.1036	44.6569	49.0249	48.4728
ADTRP	0.465183	0.484589	0.245088	0.455764	0.733353	0.428399	ADTRP	2.39946	2.63895	2.04327	2.4945	2.64401	2.45374	ADTRP	0	0	0	0	0	0	ADTRP	0.184101	0.216225	0.402259	0.091111	0.449575	0.35554
AEBP1	0	0	0	0.014283	0	0	AEBP1	9.7486	9.203	9.50655	9.83919	9.70098	9.30135	AEBP1	606.904	596.35	588.612	581.518	585.936	585.783	AEBP1	130.077	128.583	133.725	125.012	131.991	140.288
AEBP2	17.0348	20.8689	22.6627	20.0023	18.6589	16.9415	AEBP2	17.5611	9.20474	16.8796	15.7889	18.1823	16.2597	AEBP2	94.225	96.5133	96.9426	101.409	97.9155	97.8545	AEBP2	37.5291	36.8277	40.5897	32.2613	37.8793	41.0005
AEN	45.2805	46.1759	46.6672	49.3403	46.6581	44.9434	AEN	21.961	20.7153	22.3724	20.6186	21.3334	19.9697	AEN	17.281	18.006	19.8521	20.1639	19.3261	18.9775	AEN	33.6119	32.8789	34.6251	29.8424	33.8223	33.9133
AFAP1	32.9869	31.7974	29.9286	34.0995	28.4408	27.7397	AFAP1	6.05577	5.73629	6.2036	5.54958	6.08317	5.44019	AFAP1	35.4684	34.8079	35.3387	35.2448	34.9749	38.2313	AFAP1	100.65	96.2127	104.615	91.1115	106.605	108.316
AFAP1-AS1	0.009374	0.013871	0.015452	0	0.00836	0.016201	AFAP1-AS1	0.006975	0.006766	0	0.009779	0	0.032769
AFAP1L1	5.67207	3.96339	4.58466	4.9822	4.23646	4.50124	AFAP1L1	25.7008	20.429	21.6893	24.5283	21.3186	24.4971	AFAP1L1	0.045246	0.026619	0.082228	0.016745	0.050044	0.015755	AFAP1L1	3.7844	3.64937	4.21306	3.21741	3.45008	4.28713
AFAP1L2	23.662	20.4502	24.1505	21.0762	17.2916	20.4733	AFAP1L2	67.1883	63.8677	64.2537	63.0563	61.6705	66.5855	AFAP1L2	0.4468	0.350348	0.306452	0.552346	0.256307	0.271519	AFAP1L2	10.3619	10.0882	12.1878	10.568	10.7548	12.9954
AFDN	9.65675	8.81835	8.3411	9.00146	9.11753	9.49501	AFDN	27.393	25.3484	26.4967	25.2142	27.0841	24.9791	AFDN	31.6196	29.2724	29.5519	29.5734	31.0954	30.4049	AFDN	34.7706	30.5464	33.2453	29.0687	35.4259	38.7782
AFDN-DT	0.058297	0	0.023956	0	0.077846	0.025173	AFDN-DT	0.051138	0.090737	0.07553	0.030187	0.18448	0.040558
AFF1	16.8279	14.2848	13.7614	18.1961	16.7209	18.0662	AFF1	29.5971	26.2189	29.0795	29.1619	29.8999	24.8867	AFF1	16.5073	14.0583	15.6767	14.9445	15.2559	16.4365	AFF1	14.6891	13.6625	14.9412	12.2704	14.9776	15.6112
AFF1-AS1	1.51653	1.63979	1.25835	1.78062	1.79871	1.51217	AFF1-AS1	2.56093	2.50643	3.46717	2.30836	2.14499	2.59729
AFF2	0.00512	0.007576	0.008445	0.009067	0.004568	0	AFF2	0.011443	0.019852	0.013359	0.038523	0.003664	0.035251	AFF2	3.09472	2.72989	2.59761	2.29148	2.57312	2.9065	AFF2	0	0	0	0	0	0
AFF3	0.032538	0.018541	0.020568	0.008019	0.025022	0.042849	AFF3	0.019112	0.019129	0.059493	0.014223	0.03624	0.020509	AFF3	2.53456	2.14596	1.6674	1.99548	2.45327	2.39638	AFF3	5.92411	5.68982	6.17042	5.63127	6.75446	7.66025
AFF4	30.4531	28.6041	25.3721	31.5052	28.0062	28.3694	AFF4	39.4619	37.5742	39.9413	36.4746	38.0181	33.6781	AFF4	32.4423	29.5567	30.6426	32.3409	31.1142	31.8495	AFF4	31.157	28.5405	31.5111	26.9319	30.6501	33.313
AFG1L	1.50534	1.40413	1.41218	2.10435	1.59883	2.16057	AFG1L	3.26075	4.32868	3.64506	3.47225	4.02453	3.82718	AFG1L	8.24498	7.32549	7.25036	8.91997	7.34087	8.99215	AFG1L	8.78953	9.74926	8.83564	8.35639	9.56643	8.88308
AFG3L1P	6.36542	7.46209	7.19826	6.11879	8.13813	7.32671	AFG3L1P	7.22824	7.22191	7.54674	7.90786	7.62493	8.21978
AFG3L2	51.601	50.2395	50.6233	46.0413	48.2854	45.4568	AFG3L2	76.8175	73.3359	73.6261	75.0418	71.1853	71.5704	AFG3L2	72.1742	69.553	69.3436	71.326	71.8924	69.9565	AFG3L2	77.666	74.7128	78.7706	69.0825	77.7406	80.1059
AFM	0	0	0	0	0	0	AFM	0	0	0	0	0	0	AFM	0.265862	0.075327	0.216001	0.194478	0.462031	0.147773	AFM	0.081671	0.031953	0	0.033968	0	0.052502
AFMID	26.3951	28.1065	28.6112	24.7915	25.1037	26.0254	AFMID	35.4041	34.7208	32.0153	37.2295	29.7888	31.3219	AFMID	4.50191	4.19097	4.44438	4.28001	4.32555	4.20812	AFMID	34.2911	32.7629	31.0688	30.4684	28.8974	30.8092
AFP	0.531428	0.305754	0.630845	0.442773	0.46777	0.585492	AFP	0.491148	0.218145	0.17815	0.213894	0.395909	0.184482	AFP	0	0	0	0	0	0	AFP	0.054149	0.031778	0.055628	0.033782	0.036281	0.052217
AFTPH	32.5485	31.1345	30.2089	31.7843	30.0542	30.3034	AFTPH	31.3597	31.3414	32.5193	32.298	30.8055	30.0156	AFTPH	32.7278	28.6853	30.0825	28.7981	30.2496	31.2716	AFTPH	19.1595	19.2786	21.2914	18.0483	21.0595	21.0298
AFTPH-DT	0.13928	0.128782	0.085783	0.09208	0.309818	0.030012	AFTPH-DT	2.59736	3.16355	2.63631	3.23671	3.26259	2.82335
AGA	27.6562	29.2752	28.7608	28.3229	32.0488	31.9904	AGA	24.6942	27.236	31.5336	25.7039	27.7922	29.9282	AGA	43.0714	41.4196	40.4866	37.4933	40.2237	41.7714	AGA	35.9586	38.0966	36.0563	33.0531	35.8576	33.3723
AGA-DT	0.33179	0.346701	0.563954	0.220462	0.487868	0.228727	AGA-DT	0.410932	0.432054	0.26388	0.633179	0.359515	0.412786
AGAP1	12.9337	11.869	13.1449	9.60651	8.93986	10.1458	AGAP1	15.1837	15.804	15.52	13.7517	15.0058	13.5012	AGAP1	52.6976	47.6923	49.9241	44.9468	45.6298	49.3876	AGAP1	13.9839	14.3767	14.2051	12.2804	15.7398	15.9722
AGAP1-IT1	0.392987	1.15862	0.105622	0.569084	0.917023	0.332426	AGAP1-IT1	0.84057	0.899572	0.651247	1.03526	0.798403	0.175094
AGAP10P	0.507137	0.16357	0.487303	0	0.56335	0.589295	AGAP10P	0.315583	0.397866	0.073984	1.04526	0.327581	0
AGAP11	0.046152	0.071715	0.0712	0.019095	0.148596	0.058417	AGAP11	0.0562	0.055892	0.041592	0.119928	0.117125	0.015706
AGAP12P	0.283937	0.867328	0.391676	0.527938	0.958765	0.355307	AGAP12P	0.174341	0.694028	0.419765	0.718483	0.393735	1.05574
AGAP13P	0	0	0.747118	0.78008	1.24424	0.552584	AGAP13P	1.72785	1.62455	2.13115	2.08953	1.84656	1.79462
AGAP14P	0	0	0	0	0	0	AGAP14P	0	0	0.202803	0.146268	0	0
AGAP2	0.569749	0.417443	0.604554	0.429539	0.439672	0.807957	AGAP2	0.026532	0.060051	0.051599	0.03719	0.00944	0.016619	AGAP2	3.79805	3.77535	4.05363	3.11574	3.54589	3.29176	AGAP2	0.449396	0.227451	0.454398	0.404139	0.44002	0.363547
AGAP2-AS1	33.4194	35.356	33.3833	32.4107	31.918	32.8095	AGAP2-AS1	7.90659	7.81759	8.53196	7.20507	7.19501	8.05114
AGAP3	44.0759	41.76	44.0965	41.7704	36.5049	42.3503	AGAP3	58.9251	59.3798	60.0106	53.4912	51.6841	54.2484	AGAP3	34.144	34.0029	33.7669	30.3987	33.5863	33.7964	AGAP3	43.8222	40.9233	45.2761	36.6246	43.5732	44.9263
AGAP4	0.750119	1.02203	0.945929	1.67324	2.23872	1.47014	AGAP4	1.07432	1.85842	2.44928	1.77895	0.817706	0.832745
AGAP5	0.278969	0	0.09689	0	0	0.292859	AGAP5	0	0.37161	0.988477	0.798348	1.32395	1.27585
AGAP6	1.18753	1.32001	0.604563	0.582317	0.772119	1.6871	AGAP6	1.70283	2.04666	0.656481	1.66194	1.46221	1.87979
AGAP7P	0	0	0.093426	0.155592	0.090754	0.174045	AGAP7P	1.85819	1.73469	2.25672	3.09581	2.14165	1.7615
AGAP9	0	0.772687	0.59623	0	0.990515	0.669884	AGAP9	2.39557	0	0	1.02428	0	0
AGBL1	0.010198	0	0.008411	0.013545	0	0.008817	AGBL1	0	0	0.025414	0	0.008227	0.00357	AGBL1	0.609233	0.299603	0.302843	0.213434	0.358905	0.225649	AGBL1	0.014113	0	0	0	0	0
AGBL1-AS1	0	0	0	0	0	0	AGBL1-AS1	0	0	0	0	0	0
AGBL2	0.273233	0.36384	0.194923	0.402421	0.422031	0.408861	AGBL2	0.202768	0.34079	0.126132	0.397657	0.562557	0.266619	AGBL2	3.50821	2.99718	2.84736	2.34621	3.05083	3.02423	AGBL2	0.785305	1.06768	1.03927	1.05504	1.33946	1.0746
AGBL3	1.84728	1.79613	1.76408	1.63607	1.89561	2.36272	AGBL3	2.57397	2.05201	3.33468	3.35813	2.74564	2.26985	AGBL3	1.02911	1.0924	0.879062	0.764917	1.01611	1.20932	AGBL3	16.3292	18.0476	18.1676	16.0139	20.6769	16.4785
AGBL4	0.024738	0.024389	0.033968	0.019711	0.015871	0.023089	AGBL4	0	0.02209	0	0.046069	0	0	AGBL4	0.041196	0	0	0	0	0
AGBL4-AS1	0	0	0	0	0	0	AGBL4-AS1	0	0	0	0	0	0
AGBL4-IT1	0	0	0	0	0	0	AGBL4-IT1	0	0	0	0	0	0
AGBL5	35.9374	38.0203	36.4745	35.884	35.0034	35.0076	AGBL5	28.7442	28.2667	27.525	27.5154	25.6195	28.4717	AGBL5	13.2848	12.5168	11.944	10.7433	12.2037	11.9735	AGBL5	17.0662	17.2033	18.0919	16.5145	17.5241	18.3957
AGBL5-AS1	0.274677	0.202627	0.218237	0	0	0.231203	AGBL5-AS1	0	0	0.219659	0	0	0
AGER	0.831636	0.54974	0.429889	1.02925	0.369411	0.491768	AGER	0.781395	0.97202	1.06558	1.14862	0.391755	0.583286	AGER	0.352864	0.450194	0.45383	0.597141	0.517906	0.588479	AGER	0.510044	0.384287	0.373498	0.363383	0.601663	0.315224
AGER-2	0	0	0	0	0	0	AGER-2	0	0	0	0	0	0.101742
AGER-3	0	0	0.118198	0	0	0	AGER-3	0	0	0	0	0	0.101742
AGFG1	35.215	33.8615	33.6329	31.1961	31.6589	32.4967	AGFG1	22.3133	21.9779	22.9048	21.2345	21.8578	20.1742	AGFG1	90.8994	86.1221	95.4955	96.2655	91.6069	92.7843	AGFG1	44.3174	44.0348	42.0198	41.5192	41.7994	43.0307
AGFG2	37.1266	27.7668	39.4257	34.0584	24.4902	35.0334	AGFG2	7.56197	7.11859	7.84254	7.22561	6.97231	7.5135	AGFG2	10.172	10.6575	9.77179	10.9913	10.7105	10.1669	AGFG2	36.3635	36.2358	38.9526	35.6752	36.3154	38.7132
AGGF1	26.2887	26.2749	26.7038	25.9704	25.2138	25.6248	AGGF1	25.5306	24.4783	25.952	24.5876	25.1925	24.9527	AGGF1	32.8549	33.4833	35.4639	35.9268	35.1096	37.98	AGGF1	31.8764	33.6393	34.0177	28.6348	35.8337	35.0755
AGK	26.1576	27.6994	26.7849	28.5449	28.5903	26.6908	AGK	25.1063	24.2378	24.5503	25.1049	25.8237	24.5933	AGK	29.2927	28.5178	28.5758	28.7203	29.863	28.9873	AGK	35.4513	36.1659	36.8593	30.8169	34.6268	37.7657
AGK-DT	0.094625	0	0	0	0	0	AGK-DT	0.076544	0	0.058646	0.070404	0.134978	0.023619
AGL	7.78526	7.50985	6.80065	7.13919	7.4865	7.63316	AGL	16.2388	15.2267	16.1926	14.9972	14.6954	13.5719	AGL	15.9157	14.8661	14.1686	15.6149	15.7825	15.2965	AGL	4.71287	4.33592	4.95884	4.89387	4.87602	5.06581
AGMAT	8.16046	8.953	8.80386	7.32196	8.15832	8.31824	AGMAT	1.05343	0.961356	0.961313	1.01228	0.873799	0.682462	AGMAT	0.075996	0.070413	0.079157	0.289867	0.031141	0.265317	AGMAT	0.046096	0.269719	0.235789	0.114854	0.061466	0.132531
AGMO	7.67115	5.14965	6.75294	5.82385	5.02952	6.80319	AGMO	0	0.021124	0	0.08895	0	0	AGMO	0	0	0	0	0	0	AGMO	0	0	0	0	0	0
AGO1	5.59477	5.43654	5.23353	5.01797	4.90165	4.869	AGO1	4.94631	5.16746	5.26035	4.89476	5.08463	4.42746	LOC102879797	25.2797	25.0723	25.4911	26.486	26.9058	25.4841	AGO1	3.11042	3.51783	3.52591	3.19718	3.44109	3.42268
AGO2	13.0169	11.6767	11.1734	11.3874	10.8199	10.1634	AGO2	9.18246	8.82784	9.95005	8.18102	9.27937	7.46863	AGO2	34.4309	31.1653	34.8935	31.9669	34.79	33.4563	AGO2	29.8313	30.2909	31.9155	28.6876	31.5097	36.6211
AGO3	1.44536	1.34457	1.40682	1.3037	1.42839	1.30153	AGO3	1.50474	1.47418	1.36106	1.29007	1.47628	1.23076	AGO3	1.56059	1.29111	1.43057	1.28758	1.3949	1.50337	LOC103294875	2.53533	2.3888	2.68607	2.50103	3.23435	2.94976
AGO4	3.56608	2.60245	2.36628	3.59128	2.81035	3.21041	AGO4	5.44598	6.1608	6.24051	5.13567	5.0922	4.59602	LOC102898136	7.37656	6.56738	6.27642	6.22803	6.8285	6.95726	AGO4	8.79902	8.82649	9.40439	8.45674	10.1671	9.82626
AGPAT1	56.7103	58.5081	56.5588	56.7182	57.7061	60.3265	AGPAT1	75.5344	69.825	71.0382	71.9304	72.4354	67.0767	AGPAT1	67.2411	69.5515	69.908	61.6803	64.7392	62.0677	AGPAT1	102.493	102.727	104.728	90.3005	100.193	102.525
AGPAT2	98.9172	101.25	99.3339	91.0055	95.8998	93.8193	AGPAT2	109.034	109.758	108.881	103.104	105.262	109.039	AGPAT2	217.143	240.309	235.032	216.573	231.917	214.089	AGPAT2	438.789	408.729	394.118	417.694	397.546	432.314
AGPAT3	28.8422	27.4067	26.3187	30.2845	31.0956	31.6184	AGPAT3	54.9748	53.6985	56.2036	54.0772	52.897	50.416								AGPAT3	28.134	28.314	28.4629	26.718	30.8027	29.4825
AGPAT4	1.07251	1.35602	1.22722	1.42383	1.40635	1.36965	AGPAT4	5.5053	5.13267	5.66013	4.90531	5.01199	5.03298	AGPAT3	116.221	114.8	113.694	108.713	106.587	110.104	AGPAT4	14.5618	12.2825	13.8108	12.3705	14.2499	13.3323
AGPAT4	1.07251	1.35602	1.22722	1.42383	1.40635	1.36965	AGPAT4	5.5053	5.13267	5.66013	4.90531	5.01199	5.03298	AGPAT4	2.2464	2.34376	2.72931	2.16789	1.71975	1.93608	AGPAT4	14.5618	12.2825	13.8108	12.3705	14.2499	13.3323
AGPAT4-IT1	0.03725	0.055106	0.122316	0.032823	0	0.032091	AGPAT4-IT1	0.302409	0.372758	0.320206	0.345931	0.380973	0.154762
AGPAT5	44.9726	44.4909	41.1605	40.3378	32.9241	31.8336	AGPAT5	25.072	24.4086	29.9127	23.9241	26.6489	24.4065	AGPAT5	15.1007	15.2041	15.9287	15.5559	14.6131	15.0708	AGPAT5	81.5423	78.5768	78.7911	74.4621	75.912	78.0241
AGPS	49.6509	45.7693	45.6526	46.3769	45.7918	39.4501	AGPS	86.4058	87.2933	84.3616	84.2579	92.0133	86.3344	AGPS	39.821	37.1797	36.7239	35.8575	38.4705	38.4533	AGPS	95.3499	98.9354	98.2441	88.5506	97.806	96.2068
AGR2	177.73	184.113	184.543	163.199	201.272	202.619	AGR2	430.324	463.224	451.58	472.913	451.949	460.017	AGR2	0	0	0	0	0	0	AGR2	0.960019	1.11854	0.675867	0.458949	0.977744	0.911872
AGR3	0	0.332061	0.729566	0.195675	0.297647	0.191887	AGR3	0.243335	0.296287	0.623103	0.450294	0.587538	0.606396	AGR3	0.082275	0	0	0.519462	0	0	AGR3	4.59924	5.77117	5.96342	5.59491	4.72832	6.16846
AGRN	92.5963	91.8187	87.5586	118.089	127.441	131.716	AGRN	617.986	562.093	574.981	577.013	618.062	576.439	AGRN	162.668	156.091	151.764	145.131	154.991	152.918	AGRN	130.167	120.928	121.437	121.811	133.801	139.816
AGRP	0	0	0	0	0	0	AGRP	0	0	0	0	0	0.130109	AGRP	0	0.100858	0	0	0	0.114632	AGRP	0	0	0	0	0	0
AGT	0.834462	1.02086	0.843726	0.764168	1.25681	1.02361	AGT	0.237223	0.113056	0.110562	0.099552	0.050589	0.20037	AGT	0.168392	0.107415	0.043788	0.045727	0.103279	0.083862	AGT	5.69867	4.95254	3.95466	5.72723	5.29169	5.38705
AGTPBP1	14.7566	15.0117	14.2354	13.8161	14.7032	13.1446	AGTPBP1	13.9542	13.5626	13.3254	12.8422	12.2198	12.1744	AGTPBP1	7.83947	7.65588	7.48662	7.49782	6.91609	7.39214	AGTPBP1	2.44057	2.88469	2.97526	2.4259	2.65665	3.04962
AGTR1	2.77442	1.85377	1.48494	2.28383	2.10426	2.14949	AGTR1	0	0	0	0	0	0	AGTR1	0	0	0	0	0	0	AGTR1	0	0	0	0	0	0
AGTR2	0	0	0	0	0	0	AGTR2	0	0	0	0.02456	0	0	AGTR2	0	0	0	0	0	0	AGTR2	0	0	0	0	0	0
AGTRAP	95.0362	88.4606	86.4998	90.5716	88.192	89.9471	AGTRAP	66.6609	68.3126	72.3268	71.7757	67.1883	71.8866	AGTRAP	76.2285	79.6441	75.7138	69.2313	68.6705	72.2503	AGTRAP	133.329	143.419	127.031	121.258	126.82	125.715
AGXT	0.023441	0	0.037594	0	0.020353	0	AGXT	0.073757	0	0.019732	0.023681	0	0.020961	AGXT	0	0	0	0	0	0	AGXT	0.168178	0.443101	0.430508	0.31438	0.280612	0.040347
AGXT2	0	0	0	0	0	0	AGXT2	0	0	0	0	0.026982	0	AGXT2	0	0	0	0	0	0	AGXT2	0	0	0	0	0	0
AHCTF1	30.4034	28.4878	26.9078	30.2181	26.6226	25.7241	AHCTF1	18.2183	18.4127	19.786	17.6949	18.4734	17.4442	AHCTF1	31.6817	27.9856	30.5739	30.7945	31.3169	31.208	AHCTF1	27.1149	24.4032	28.9493	23.0061	28.6446	30.7836
AHCTF1P1	0.344496	0.310351	0.220364	0.343783	0.297158	0.296915	AHCTF1P1	0.046695	0.157968	0.097951	0.09436	0.060066	0.052127
AHCY	320.285	343.482	329.797	318.28	321.33	304.977	AHCY	191.66	197.495	182.671	184.657	177.65	184.008	AHCY	250.503	256.844	259.165	237.565	247.362	251.848	AHCY	139.455	148.25	135.508	139.009	137.597	134.05
AHCYL1	92.115	88.9669	89.4253	85.7649	89.4886	89.7468	AHCYL1	131.554	130.509	132.624	132.258	131.857	125.873	AHCYL1	180.376	172.149	176.272	171.21	171.112	173.388	AHCYL1	242.153	239.767	250.19	228.595	246.184	257.839
AHCYL2	12.6466	12.3841	10.9102	12.3331	12.4672	12.5354	AHCYL2	16.6819	16.2622	15.7289	16.5219	16.713	16.0241	AHCYL2	11.8906	11.8314	11.3814	12.3347	11.0492	11.5647	AHCYL2	13.0984	13.6524	14.6074	14.8148	14.104	15.5757
AHDC1	7.06809	6.07623	6.33159	5.32186	4.36579	5.47071	AHDC1	14.9008	13.0995	14.8094	12.541	13.9264	12.7542	AHDC1	10.2575	10.4534	10.5205	9.94068	9.49079	10.3405	AHDC1	16.0906	15.0446	16.3773	13.776	15.6838	16.8569
AHI1	9.21056	8.24021	8.90698	9.92786	8.82916	9.06207	AHI1	4.40855	4.27729	4.3681	4.49232	4.43598	4.18562	AHI1	14.6755	13.0452	13.5662	13.4577	14.0917	13.3888	AHI1	13.1077	11.4152	12.9876	10.3075	12.6169	13.6309
AHI1-DT	0.237653	0.385633	0.723654	0.301136	0.47334	0.284553	AHI1-DT	1.72911	1.90797	1.80282	1.51935	1.81459	1.44698
AHNAK	50.8803	49.2169	46.2887	56.7563	45.0631	45.2586	AHNAK	241.01	202.047	232.417	196.798	259.616	187.549	AHNAK	87.9626	69.7906	77.3183	82.4661	84.4736	90.8983	AHNAK	135.951	97.8912	106.909	111.535	111.593	132.375
AHNAK2	56.137	52.1268	48.8748	58.3605	46.891	46.1448	AHNAK2	37.6385	34.0027	38.4917	33.1157	41.4787	29.9497	LOC102890547	63.0737	59.9638	61.0695	56.3204	66.409	64.4212	AHNAK2	48.5552	37.5057	40.5543	38.9888	45.0139	54.1105
AHR	24.4388	23.574	23.0281	23.8816	26.2353	24.4584	AHR	54.7652	54.5312	56.998	52.5852	53.3135	48.4639	AHR	0.386985	0.418979	0.478213	0.366829	0.354139	0.438674	AHR	48.7261	48.5785	48.4176	45.462	50.5002	51.9809
AHRR	0.754826	0	0.753493	0.272034	0.692545	0	AHRR	0.879719	0.305157	1.41723	0	0.872685	1.2803	AHRR	2.42577	2.49146	2.16084	2.2378	2.24626	2.40757	AHRR	18.284	16.0161	18.8511	15.9268	18.8687	19.7881
AHSA1	239.856	234.864	246.316	225.448	228.012	231.763	AHSA1	127.056	129.113	129.81	125.432	127.359	130.272	AHSA1	144.231	146.701	148.024	156.492	152.802	153.763	AHSA1	125.311	120.053	131.054	113.719	118.812	128.687
AHSA2P	4.5484	5.03228	4.9115	5.18318	6.71501	6.51131	AHSA2P	3.75019	3.3954	4.04621	4.56649	3.5404	3.5681
AHSG	0.357844	0.351405	0.389453	0.250801	0.596465	0.346533	AHSG	0.069922	0.031889	0.040691	0.04883	0.037248	0	AHSG	0	0	0	0	0	0	AHSG	0	0	0	0	0	0
AHSP	0	0	0	0	0	0	AHSP	0	0	0	0	0	0	AHSP	0	0	0	0	0	0	AHSP	0.174881	0	0	0	0	0.323909
AICDA	0.125899	0.196937	0.211056	0.083589	0.198497	0.183775	AICDA	0.403324	0.526921	0.599713	0.639389	0.723977	0.384785	AICDA	0	0	0	0	0	0
AIDA	74.6243	71.9152	74.6079	91.9701	86.4867	88.0836	AIDA	101.366	99.264	98.6012	106.302	101.741	104.093	AIDA	111.534	106.017	109.07	108.656	105.702	109.047	AIDA	145.611	144.855	146.778	141.79	145.999	147.789
AIF1	0	0	0	0	0	0	AIF1	0	0	0	0	0	0	AIF1	0	0	0	0	0	0	AIF1	0	0	0	0	0	0.09655
AIF1L	1.5736	1.37969	1.31107	1.16718	1.2297	0.905534	AIF1L	240.203	239.309	235.368	244.543	240.388	236.59	AIF1L	126.925	129.276	134.415	139.641	134.154	130.177	AIF1L	796.297	805.507	808.875	828.43	816.567	886.769
AIFM1	115.496	109.318	115.751	108.367	111.287	110.824	AIFM1	89.6781	89.6915	83.4243	90.664	85.2378	90.6487	AIFM1	60.9134	62.4358	61.4825	64.5285	61.1036	63.6139	AIFM1	28.2859	30.0359	30.5613	29.8391	30.2314	31.3854
AIFM2	50.4698	51.4809	50.8009	47.9782	47.626	47.2836	AIFM2	21.0093	20.7711	21.666	22.3335	21.2788	20.8502	AIFM2	16.0505	17.9104	15.3459	15.4007	17.7102	19.8465	AIFM2	98.5071	97.5458	98.6206	91.7215	96.5237	98.0213
AIFM2	50.4698	51.4809	50.8009	47.9782	47.626	47.2836	AIFM2	21.0093	20.7711	21.666	22.3335	21.2788	20.8502	AIFM2	16.0505	17.9104	15.3459	15.4007	17.7102	19.8465	LOC103298014	0	0	0	0	0	0
AIFM3	0.552777	0.363467	0.553848	0.379217	0.808588	0.631602	AIFM3	0.086697	0.022001	0	0.031769	0.024215	0.021313	AIFM3	0.563025	0.717709	0.695995	0.788786	0.612229	0.743577	AIFM3	0.413952	0.431338	0.401227	0.343797	0.431604	0.377119
AIG1	31.5794	30.2051	32.2259	28.1284	26.5186	30.7966	AIG1	78.8451	74.2587	74.6186	77.5664	70.7996	76.3895	AIG1	4.87208	4.37143	3.83013	3.68227	5.59511	4.18376	AIG1	55.8861	58.1566	54.4536	57.9666	54.8969	54.0872
AIM2	0	0.062132	0	0.036991	0.074871	0.072309	AIM2	0.01085	0.152742	0	0	0.066068	0.010155
AIMP1	35.6801	35.9696	35.4616	35.6691	38.0929	34.0907	AIMP1	36.419	35.4498	38.0351	35.213	37.2896	36.3003	AIMP1	126.141	114.968	118.064	120.943	123.576	125.595	AIMP1	40.9721	40.3671	41.9186	36.5355	40.799	39.4982
AIMP2	147.638	155.868	137.011	146.04	139.958	132.819	AIMP2	101.495	100.604	101.487	98.9307	99.4768	104.586	AIMP2	157.872	144.157	157.827	157.676	149.567	150.441	AIMP2	88.2541	86.2664	82.0252	88.0201	84.7831	83.937
AIP	95.7586	97.2061	99.5887	96.6696	93.2155	90.8373	AIP	76.914	74.0096	71.3742	78.2813	70.8939	78.6331	AIP	79.381	75.7302	77.9932	75.1788	76.2064	77.8055	AIP	75.918	75.9219	76.2798	71.4399	76.878	68.8196
AIPL1	0.054402	0.073011	0.040477	0.08658	0.021904	0.042524	AIPL1	0.018256	0	0	0.025525	0.039106	0	AIPL1	0	0	0	0	0	0	AIPL1	0	0	0	0	0	0.053124
AIRE	0.071599	0.059748	0.050993	0.097214	0.106027	0	AIRE	0.090855	0	0.296767	0	0.071068	0.114095	AIRE	0.129193	0.137284	0.10112	0.07072	0.106196	0.129129	AIRE	0	0	0.030898	0	0	0.028995
AIRN	0	0	0	0	0	0	AIRN	0	0	0	0	0	0
AJAP1	0	0.007699	0	0	0	0.023017	AJAP1	81.2366	73.0964	75.9239	67.0119	64.3436	66.8372	AJAP1	0	0	0	0	0	0	AJAP1	0	0	0	0	0	0
AJM1	3.6135	3.80449	3.80048	2.75285	3.24201	3.03718	AJM1	3.54194	3.17536	2.86817	2.89445	3.04433	2.87159	AJM1	0.262495	0.354118	0.405177	0.222797	0.409802	0.310528	AJM1	1.00619	0.87773	0.885741	1.17553	0.91597	1.30358
AJUBA	86.822	85.6856	89.7242	104.531	73.3257	70.6466	AJUBA	79.5886	73.441	78.7337	73.308	77.3295	78.8029	AJUBA	153.943	154.904	170.163	167.321	157.918	162.849	AJUBA	123.059	116.963	121.956	109.293	117.398	121.984
AJUBA-DT	0.917202	0.8594	1.03001	0.75508	1.03412	1.1334	AJUBA-DT	0.836487	0.94189	0.684965	1.10704	0.650917	1.08217
AK1	33.4456	32.3836	35.8087	29.9859	29.5872	33.2363	AK1	37.2878	35.1027	36.6379	36.0061	33.2719	37.3687	AK1	118.911	114.709	113.594	119.48	116.736	124.245	AK1	28.0118	25.3941	26.1197	24.7686	26.6339	22.2794
AK2	51.0395	53.8387	52.5557	55.6239	56.3498	54.2088	AK2	55.1327	56.8155	55.7215	57.2862	57.8071	55.9135	AK2	174.766	186.859	186.007	195.094	193.502	174.255	AK2	194.541	209.689	190.856	193.459	205.192	206.508
AK3	49.2239	47.198	45.0142	41.7119	45.0024	43.9186	AK3	52.2853	52.767	50.5664	49.9718	51.5967	51.4219	AK3	27.8059	25.9584	26.0028	25.9618	26.9567	25.9532	AK3	43.1557	42.3715	41.1415	38.4061	41.9217	41.8055
AK4	3.47137	2.99335	2.85366	2.6856	2.99353	3.85902	AK4	15.8353	16.9139	17.3462	15.9884	16.1757	14.7424	AK4	14.2428	14.2652	13.1779	12.4918	13.4897	13.5993	AK4	3.14126	3.05187	2.44253	4.0173	1.47491	2.51183
AK5	6.11325	5.93162	6.36338	6.35812	5.66951	6.38297	AK5	82.9707	79.403	82.2744	79.4028	76.7191	78.0232	AK5	22.0078	20.2146	20.2238	19.896	20.0587	20.7229	AK5	3.4114	3.25177	3.06499	3.32232	3.41407	3.25909
AK6	30.7087	31.4709	30.7703	28.2375	28.2987	30.2018	AK6	31.0752	31.4759	30.8384	29.3975	27.8873	32.1312	AK6	70.8121	65.6461	66.7118	62.5815	69.2128	68.4667	AK6	45.4268	44.1392	46.5876	36.1085	46.4923	40.8547
AK7	3.59604	3.29449	3.23454	3.35175	3.82033	3.78962	AK7	2.8963	2.89592	2.45306	2.74998	2.66089	2.71075	AK7	3.23396	3.65641	2.52973	3.42786	3.06498	3.56831	AK7	1.58942	1.43658	1.42783	1.39919	1.91476	1.59517
AK8	1.74216	1.38159	1.40588	1.33096	1.66947	0.603884	AK8	1.89239	2.15753	1.79394	2.20182	1.98415	2.01176	AK8	6.22573	6.11533	6.12802	4.83223	5.76706	5.53868	AK8	0.656002	0.329774	0.577116	0.27275	0.501779	0.391078
AK9	3.20935	2.66886	2.61482	2.74093	2.67278	3.17725	AK9	2.45454	2.58168	2.80185	2.69671	2.69142	2.15781	AK9	1.72016	1.6452	1.63883	1.39294	1.54612	1.87746	AK9	2.47869	2.3625	2.61838	2.16663	2.7027	2.64923
AKAIN1	0	0	0	0	0	0	AKAIN1	0	0	0.018598	0	0	0	AKAIN1	0	0	0	0.202152	0.158103	0	AKAIN1	0.064638	0	0.131724	0.160811	0.257348	0
AKAP1	52.8248	51.4394	50.8176	45.8124	48.9035	48.6285	AKAP1	26.7924	26.1798	25.564	25.737	25.0243	25.3014	AKAP1	9.42095	9.39452	9.10548	8.74641	9.54265	9.19872	AKAP1	32.9953	32.6708	37.0399	28.7754	34.0568	37.1634
AKAP10	30.4232	29.8259	28.4303	30.5007	28.0633	30.2037	AKAP10	17.1519	17.8445	18.5466	20.1102	17.7663	19.5543	AKAP10	11.9877	11.5056	11.6131	10.3399	11.2673	12.0861	AKAP10	16.9101	17.6832	18.8187	16.0316	17.9056	18.3532
AKAP11	14.357	13.7429	12.1975	14.3211	13.3379	13.3974	AKAP11	17.6117	16.8922	17.9508	17.0618	17.4204	15.2985	AKAP11	23.0974	20.0325	20.7976	20.2253	22.0849	21.0624	AKAP11	13.4719	13.0006	14.0305	12.1331	13.3267	14.7293
AKAP12	23.5296	22.6393	20.4746	25.0422	25.2134	23.7289	AKAP12	50.457	44.3156	49.7124	40.0111	44.4521	42.4952	AKAP12	13.6463	12.0398	12.6698	13.8988	13.1064	13.4496	AKAP12	144.254	131.379	145.532	125.936	148.778	174.276
AKAP13	23.8534	21.7893	20.912	27.0022	22.57	23.3808	AKAP13	19.6849	18.0165	19.2219	18.088	20.8231	16.3845	AKAP13	15.4757	12.935	12.9121	13.9855	14.0389	14.8699	AKAP13	17.6087	14.841	16.2008	14.5712	17.5423	18.6003
AKAP14	0	0	0	0	0	0	AKAP14	0	0	0	0	0	0	AKAP14	0	0	0.133168	0	0.103052	0	AKAP14	0	0	0.053156	0	0.138536	0
AKAP17A	35.2504	34.3002	36.0772	34.2898	35.7862	33.8554	AKAP17A	26.8146	25.0154	25.7902	25.5884	25.7676	25.9642	AKAP17A	35.1708	35.7547	37.6802	31.3771	34.0488	36.489	AKAP17A	14.9275	16.3858	18.0207	12.5841	17.7828	16.6679
AKAP17BP	0	0	0	0	0	0	AKAP17BP	0	0	0	0	0	0
AKAP3	0.297188	0.234509	0.163049	0.22755	0.26294	0.564336	AKAP3	0.788081	0.584186	0.578677	0.596917	1.10559	0.794937	AKAP3	0	0	0	0	0	0	AKAP3	0.236866	0.389919	0.180616	0.33851	0.235701	0.246902
AKAP4	0	0	0	0	0	0	AKAP4	0.017139	0	0	0	0	0	AKAP4	0	0	0	0	0	0	AKAP4	0	0	0	0	0	0
AKAP5	1.91288	1.73899	2.2048	1.78043	1.48506	1.82324	AKAP5	2.68654	2.6474	2.6992	2.73614	2.70386	2.37836	AKAP5	0.118615	0.187046	0.160455	0.198615	0.084637	0.145192	AKAP5	0.525709	0.142097	0.24853	0.252014	0.216008	0.427095
AKAP6	0.971488	0.996243	0.869532	0.876093	0.825419	0.921747	AKAP6	0.268624	0.318631	0.254832	0.29398	0.287921	0.266701	AKAP6	0.081571	0.088147	0.062439	0.049711	0.105003	0.089737	AKAP6	1.46181	1.11154	1.17708	1.20439	1.13041	1.54012
AKAP7	5.24589	4.51682	3.76847	6.3237	6.56185	5.62388	AKAP7	17.3892	16.1858	16.702	15.816	18.248	17.8475	AKAP7	4.78059	5.32284	4.49659	4.0474	5.07611	4.3566	AKAP7	10.741	11.9608	12.3922	13.1468	12.3501	10.6623
AKAP8	17.0264	15.2596	17.0577	15.3232	15.1183	14.6466	AKAP8	17.3783	17.3999	18.0619	18.2685	17.68	17.6094	AKAP8	46.5377	45.6828	44.2958	45.4752	48.3374	47.4754	AKAP8	22.0865	20.6984	24.8194	18.1128	22.3153	25.6536
AKAP8L	42.3118	39.3082	41.8162	44.7209	36.0057	38.2828	AKAP8L	26.4797	25.2943	25.2403	28.2774	24.5194	26.357	AKAP8L	38.5259	38.2812	37.7452	34.883	36.1472	35.6305	AKAP8L	18.6726	17.0695	18.0156	17.0024	16.1045	19.079
AKAP9	7.82275	6.76961	6.5308	8.07606	7.92217	7.73605	AKAP9	11.2	10.6875	11.3173	11.2066	11.8865	9.51108	AKAP9	10.4162	8.32931	9.18139	9.23949	9.48023	10.1092	AKAP9	9.21569	7.08599	11.0425	6.32441	11.1238	12.4472
AKIP1	54.4573	58.0021	57.0808	56.2295	57.0447	55.6877	AKIP1	48.1575	49.0556	47.6124	48.5626	49.8727	45.579	AKIP1	39.6261	34.2027	33.372	33.3695	35.5293	34.8755	AKIP1	19.1032	21.1784	20.495	18.3657	19.1604	18.3308
AKIRIN1	44.8679	42.8389	43.9422	43.633	42.4584	42.6701	AKIRIN1	70.0548	67.769	68.0076	69.4433	66.8886	69.2238	AKIRIN1	21.2766	21.1033	22.4464	21.273	21.7438	21.5619	AKIRIN1	68.8342	68.7137	66.9342	63.5685	62.8217	64.5357
AKIRIN2	43.4199	44.9161	42.1137	47.1064	39.144	40.4657	AKIRIN2	43.4886	44.346	43.9665	42.3569	44.5379	41.4317	AKIRIN2	80.0166	78.4607	84.405	82.5653	79.3814	81.604	AKIRIN2	128.711	124.327	128.56	119.004	125.3	127.923
AKNA	4.0093	3.97149	3.35491	3.7895	3.61759	4.31209	AKNA	84.7415	81.9269	86.8623	79.9347	81.834	78.0802	AKNA	3.39906	3.09827	3.27032	3.03771	3.34102	2.94309	AKNA	4.6367	4.46281	4.88054	3.55051	5.27228	4.94373
AKNAD1	0.043251	0.067256	0.018697	0.100358	0.060737	0.117672	AKNAD1	0.016845	0	0.039282	0	0.017971	0	AKNAD1	0.447105	0.26726	0.382239	0.201992	0.356872	0.466045	AKNAD1	0.036763	0.086419	0.165378	0.15603	0.098751	0.069064
AKR1A1	103.495	105.608	102.153	98.6771	100.788	108.895	AKR1A1	142.721	144.359	140.224	132.767	134.637	140.897	AKR1A1	279.711	286.783	266.552	266.646	260.475	256.523	AKR1A1	169.576	175.816	159.966	161.514	162.647	154.534
AKR1B1	6106.09	4502.79	6409.34	6451.19	4162.53	5958.5	AKR1B1	857.112	791.093	778.533	762.453	698.67	829.232	AKR1B1	394.577	395.834	387.165	389.583	384.802	388.698	LOC103294122	856.443	832.762	814.574	794.641	781.554	800.351
AKR1B10	5133.3	4606.04	5311.08	4643.1	4358.77	5049.16	AKR1B10	0.644371	0.713538	0.739575	0.59855	0.814615	1.01526
AKR1B15	81.1685	64.9414	72.2776	61.5389	55.9414	68.7256	AKR1B15	0.076907	0	0.076297	0	0	0.072098
AKR1C1	352.143	297.436	366.504	331.311	278.23	351.844	AKR1C1	13.0349	13.1418	12.2699	13.3692	13.1041	14.5474
AKR1C2	3101.66	2961.69	3188.7	2996.64	3038.09	3159.73	AKR1C2	10.3687	9.84393	9.71438	10.3011	9.46653	12.1194	LOC102889546	14.0349	13.9709	11.0857	13.2152	12.7645	14.8585
AKR1C3	4391.68	4393.04	4533.5	4258.79	4280.52	4421.65	AKR1C3	184.567	179.077	178.46	177.01	178.071	187.173
AKR1C4	2.95552	3.05785	3.47241	2.5599	3.47142	2.21832	AKR1C4	0	0	0	0.064702	0	0
AKR1C6P	0	0.037902	0	0	0	0	AKR1C6P	0	0	0.045965	0	0	0
AKR1C8	0.726716	0.871199	0.821332	0.522807	0.844523	1.20773	AKR1C8	0.014819	0	0	0.059769	0.015811	0.059897
AKR1D1	0.053534	0.019669	0	0.0693	0.023702	0	AKR1D1	0.336561	0.332606	0.135105	0.302989	0.615845	0.407251	AKR1D1	0	0	0	0	0	0	AKR1D1	0	0	0	0	0	0
AKR1D1	0.053534	0.019669	0	0.0693	0.023702	0	AKR1D1	0.336561	0.332606	0.135105	0.302989	0.615845	0.407251	AKR1D1	0	0	0	0	0	0	LOC103294105	0	0	0	0	0.035052	0
AKR1E2	8.53207	5.63331	8.02304	8.65254	8.10736	8.58831	AKR1E2	2.61742	2.00979	1.86482	1.96819	2.31473	2.41122	AKR1E2	37.4714	36.1004	40.0707	33.8044	35.7213	39.5582	AKR1E2	85.3993	81.582	87.4748	78.765	77.8681	85.8319
AKR7A2	71.2989	70.6911	65.7411	67.3083	62.7288	67.1039	AKR7A2	98.5072	95.4391	96.9327	91.3939	92.7431	91.8525	LOC102882279	296.429	286.145	248.818	216.853	234.624	232.514	AKR7A2	152.797	154.018	143.055	145.11	146.3	140.614
AKR7A2P1	0	0	0	0	0	0	AKR7A2P1	0	0	0	0	0	0
AKR7A3	0.346779	0.044722	0.1792	0.111996	0.053769	0.095393	AKR7A3	0.040638	0.333888	0	0.124499	0.136191	0.086614
AKR7L	0.030254	0.084914	0.11355	0	0.027951	0	AKR7L	0	0	0.074207	0.097317	0.024846	0.019894
AKT1	116.319	115.472	114.35	117.47	115.119	122.414	AKT1	141.023	136.052	134.932	140.298	136.459	132.702	AKT1	288.839	294.734	299.043	290.033	293.278	290.272	AKT1	358.752	360.24	352.994	334.541	347.911	363.333
AKT1S1	146.313	140.199	144.363	126.119	127.33	134.04	AKT1S1	108.153	107.432	109.899	101.384	99.5954	102.425	AKT1S1	51.1192	51.6088	51.6316	50.8578	50.0093	48.864	AKT1S1	111.325	107.491	101.329	105.258	106.022	104.017
AKT2	87.7216	88.4731	88.7233	87.9551	87.4804	89.3533	AKT2	62.4218	59.5681	62.0782	63.9806	61.3482	60.9943	AKT2	40.3608	42.2488	42.3548	41.2736	42.339	42.2839	AKT2	99.1495	100.111	98.7181	88.4405	94.751	99.3603
AKT3	29.433	26.8814	24.6497	31.019	26.0263	25.1094	AKT3	12.0341	10.6236	13.4466	10.2809	12.7459	11.729	AKT3	1.20887	1.21906	1.10862	0.8707	1.16596	1.01351	AKT3	30.366	30.5652	32.0285	27.9031	32.9394	35.0378
AKT3-2	5.18622	5.6637	6.0523	4.88999	5.70374	5.55478	AKT3-2	1.64359	2.13185	1.04478	1.94362	1.16169	1.04527
AKT3-IT1	0	0	0	0	0	0.158322	AKT3-IT1	0	0	0	0	0	0
AKTIP	26.6535	27.3515	26.0129	24.1674	26.6257	24.7448	AKTIP	23.4924	22.1021	24.1338	22.5478	21.533	22.579	AKTIP	12.2798	11.0139	10.3154	9.75679	9.70525	9.64489	AKTIP	45.1096	37.5159	45.1602	40.1546	44.8243	46.7865
ALAD	16.361	15.5575	16.3575	15.7236	16.5775	15.5695	ALAD	27.3371	27.0827	26.8831	28.1367	27.2974	27.8849	ALAD	211.439	211.919	197.438	185.701	188.161	193.737	ALAD	18.6964	19.9903	18.5197	18.0333	19.8804	18.7778
ALAS1	66.9031	62.2066	64.8512	59.3054	62.2139	58.7964	ALAS1	75.544	74.2181	72.9349	72.7651	72.8605	74.308	ALAS1	86.3486	89.7945	84.7289	79.1518	85.2205	82.2953	ALAS1	118.3	117.193	116.475	113.426	116.749	119.641
ALAS2	0	0	0	0.031199	0	0	ALAS2	0	0	0	0.038898	0.059316	0	ALAS2	0.087328	0.123711	0.091235	0.095854	0.047936	0.058256	ALAS2	0	0	0	0	0.037295	0
ALB	0.147549	0.130975	0.218266	0.156199	0.131347	0.12722	ALB	0	0	0	0.030542	0.023278	0.020488	ALB	0	0	0	0	0	0	LOC103303909	0.325487	0.350199	0.182505	0.203064	0.145386	0.13078
ALB	0.147549	0.130975	0.218266	0.156199	0.131347	0.12722	ALB	0	0	0	0.030542	0.023278	0.020488	ALB	0	0	0	0	0	0	LOC103303910	0.054248	0.25469	0.151868	0.203064	0.181733	0.078468
ALCAM	121.402	119.284	113.411	112.968	122.292	120.584	ALCAM	271.631	264.078	270.421	267.755	259.357	263.493	ALCAM	44.5483	41.7913	42.2723	43.6195	43.6695	44.8586	ALCAM	21.2188	19.3551	23.7548	18.946	25.2017	22.655
ALDH16A1	30.1686	30.9143	29.2633	28.6629	30.4331	30.0555	ALDH16A1	28.717	26.5584	26.7737	27.2209	28.4944	27.4159	ALDH16A1	56.6361	61.2285	63.3973	58.9567	57.5999	60.6115	ALDH16A1	53.7709	54.1629	50.2017	50.7132	50.4762	49.9146
ALDH18A1	55.9092	52.7339	52.7019	50.4371	51.0318	52.0038	ALDH18A1	79.4949	78.1238	77.9764	76.2363	79.5872	73.0431	ALDH18A1	104.87	103.717	108.468	105.792	104.663	102.633	ALDH18A1	35.7813	35.8192	36.5252	34.062	35.2416	36.825
ALDH1A1	11916	11925.1	11512.1	11767.8	12636.9	12112	ALDH1A1	892.747	929.327	918.742	925.989	944.47	943.628	ALDH1A1	7.02429	6.39104	6.64811	5.30379	5.89926	5.96994	ALDH1A1	110.238	123.24	125.396	112.121	122.592	121.625
ALDH1A2	0.231572	0.140162	0.214704	0.167359	0.258674	0.121256	ALDH1A2	73.65	72.5126	70.743	69.8248	68.4714	70.7387	ALDH1A2	17.2313	16.6496	18.8688	19.2593	17.6538	17.2321	ALDH1A2	0.027872	0	0	0	0	0
ALDH1A2-AS1	0	0	0	0	0	0	ALDH1A2-AS1	0.039027	0.113468	0.090984	0.109249	0.104066	0.128234
ALDH1A3	6.47354	7.23753	7.05983	6.45354	5.94464	7.0676	ALDH1A3	0.321934	0.230714	0.146922	0.215667	0.313643	0.30577	ALDH1A3	0	0.028956	0	0.018892	0	0.017128	ALDH1A3	294.109	287.736	322.838	247.096	334.049	343.746
ALDH1A3-AS1	2.53185	2.59364	2.16971	2.60569	2.18148	2.6403	ALDH1A3-AS1	0.028733	0.01111	0.030127	0.020963	0	0
ALDH1B1	95.2674	87.7264	94.8808	91.8019	76.5127	80.5644	ALDH1B1	40.0682	40.4336	42.8568	40.8087	40.7613	38.9081								ALDH1B1	16.8723	16.7665	17.7189	14.9792	16.2994	16.4843
ALDH1L1	0.024053	0.071174	0.059349	0.084947	0.083998	0.041503	ALDH1L1	0.614637	0.931113	1.08801	1.23431	0.708689	0.92891	ALDH1L1	4.34511	4.32676	4.14958	4.18769	4.18225	4.33514	ALDH1L1	0.090524	0.037859	0.116057	0.090428	0.086544	0.105062
ALDH1L1-AS1	0	0	0	0	0	0	ALDH1L1-AS1	0	0	0	0	0	0
ALDH1L1-AS2	0	0	0	0	0	0	ALDH1L1-AS2	0	0	0.049934	0.029977	0.022847	0.040218
ALDH1L2	4.62994	4.70745	3.66691	5.49848	5.47579	4.17747	ALDH1L2	0.165207	0.116942	0.052343	0.050955	0.052859	0.04378	ALDH1L2	17.5163	16.5793	18.9544	19.8997	18.9151	18.0906	ALDH1L2	17.7007	18.9263	19.0216	17.0128	19.9228	19.7628
ALDH2	32.7266	32.3351	32.7163	31.0087	33.7161	35.9556	ALDH2	14.9934	15.0112	14.5192	15.5208	15.0232	14.8152	ALDH1B1	0	0	0	0	0	0	ALDH2	119.979	124.698	121.193	118.791	124.063	119.653
ALDH2	32.7266	32.3351	32.7163	31.0087	33.7161	35.9556	ALDH2	14.9934	15.0112	14.5192	15.5208	15.0232	14.8152	ALDH2	7.46294	7.70769	5.92354	7.20633	6.9564	7.59269	ALDH2	119.979	124.698	121.193	118.791	124.063	119.653
ALDH3A1	1750.11	1740.61	1703.96	1626.04	1694.31	1813.26	ALDH3A1	0.069383	0.066948	0.020176	0.081691	0.05556	0.118291	ALDH3A1	0.364966	0.103462	0.211009	0.044102	0.066378	0.161653	ALDH3A1	1.26373	0.899076	0.778171	0.985148	0.88801	1.12209
ALDH3A2	172.271	177.803	172.461	154.582	169.753	161.502	ALDH3A2	16.1355	16.4825	15.993	14.5897	17.6721	15.3078	ALDH3A2	162.085	158.51	150.437	152.547	148.711	157.324	ALDH3A2	121.266	125.197	124.138	119.679	127.22	124.716
ALDH3B1	162.372	180.926	149.402	149.38	185.668	173.109	ALDH3B1	42.2462	42.4628	41.4185	43.8426	44.3337	40.3914	ALDH3B2	9.34808	9.7431	7.55306	7.27536	9.01715	8.7401
ALDH3B2	0	0	0	0	0	0	ALDH3B2	0	0	0	0	0	0								ALDH3B1	9.36131	9.07217	6.88575	7.50736	7.86312	7.09807
ALDH4A1	23.0029	22.9651	21.7682	22.0225	24.202	22.0156	ALDH4A1	5.24108	5.14133	4.75151	5.0097	5.48868	4.46899	ALDH4A1	42.0981	43.8433	40.8845	40.2306	41.5566	40.9426	ALDH4A1	30.1639	31.0835	31.4267	29.8392	29.1469	31.845
ALDH5A1	11.496	12.0601	10.9407	11.4626	11.6411	12.3406	ALDH5A1	9.51234	9.16025	10.2913	9.49911	9.68395	8.99569	ALDH5A1	10.3905	11.0366	9.74327	9.52704	10.1384	9.71241	ALDH5A1	27.4372	29.4623	28.5035	27.849	28.3358	26.5639
ALDH6A1	7.00686	6.67588	6.61759	6.2196	7.41888	6.77007	ALDH6A1	6.5001	5.86516	6.51327	6.23321	6.53951	5.2771	ALDH6A1	26.8854	28.4252	24.6883	24.4778	25.402	25.9272	ALDH6A1	14.1308	14.2601	14.1402	13.7512	13.9977	13.8217
ALDH7A1	39.2058	42.4658	41.661	39.1474	42.1699	41.1796	ALDH7A1	37.5993	40.3366	35.7089	40.5951	39.077	39.7393	ALDH7A1	55.4678	56.5901	54.3385	53.7057	54.8054	56.9698	ALDH7A1	116.381	121.403	119.393	109.862	122.451	121.579
ALDH8A1	0.244607	0.241369	0.252585	0.156264	0.268321	0.185668	ALDH8A1	1.81351	2.29295	1.42045	1.83528	2.53183	1.56627	ALDH8A1	0	0	0	0	0	0	ALDH8A1	0.276292	0.280394	0.449563	0.397815	0.159849	0.533698
ALDH9A1	62.6613	61.8674	61.2103	59.3061	64.5665	62.6512	ALDH9A1	78.4139	78.0898	75.6491	78.4207	79.7024	78.1251	ALDH9A1	95.6135	98.8805	95.5412	92.3164	89.5128	94.2566	ALDH9A1	58.6451	55.2063	55.2433	53.964	53.6502	53.1273
ALDOA	1974.2	1969.25	1923.99	1895.63	1900.76	1943.72	ALDOA	1877.27	1780.46	1795.31	1784.41	1730.58	1767.13	ALDOA	1991.27	2002.19	1929.43	1886.61	1906.99	1892.29	ALDOA	2181.16	2283.66	2118.99	2176.23	2012.11	2041.65
ALDOB	0.027726	0.02051	0	0.024466	0	0.047821	ALDOB	0.020519	0.019884	0	0	0	0	ALDOB	39.1854	34.3951	27.6729	26.5859	26.0277	33.6732	ALDOB	4.7503	5.05244	6.54332	5.75462	4.13025	5.45207
ALDOC	6.02233	2.86289	4.20349	3.4308	3.95147	4.0013	ALDOC	0.642134	0.776947	0.784771	0.906716	0.855159	0.692524	ALDOC	3.7195	2.99558	3.09401	2.94588	3.2772	3.4721	ALDOC	0.519133	0.418559	0.832314	0.526065	0.694684	0.468503
ALG1	64.7417	63.8783	60.7448	65.1167	58.9663	62.7224	ALG1	51.3885	48.284	48.9908	49.4209	48.0187	45.9293	ALG1	7.18064	6.47148	6.83078	6.07574	6.62042	6.69614	ALG1	10.0035	9.87484	10.1829	9.09874	10.9123	10.2034
ALG10	5.22839	6.391	5.85262	5.86925	5.99344	6.07393	ALG10	3.70522	3.47142	3.46758	3.12563	3.59852	3.6546	LOC102879937	49.0088	43.317	52.2711	42.9828	46.9771	46.1776
ALG10B	3.08573	3.0369	2.47314	2.68691	3.0388	2.86245	ALG10B	3.6037	3.61292	3.80885	3.42717	3.77183	2.87581								LOC103285196	65.1566	65.9696	66.3632	57.3442	65.26	61.7017
ALG11	13.4623	11.9875	12.1411	13.3454	14.5201	13.8595	ALG11	24.0339	24.0553	23.6788	25.4397	25.3257	23.9056	ALG11	16.8234	15.7536	15.8465	16.6189	16.4626	16.0044	ALG11	13.7789	13.9824	15.4277	13.1359	12.94	13.6711
ALG12	19.0042	19.0834	16.5236	18.6994	17.0755	18.2166	ALG12	32.7476	29.1184	29.2432	29.1025	30.6543	28.7545	ALG12	63.6516	67.7922	67.5748	60.9752	63.6399	64.3464	ALG12	24.0727	22.2196	25.1892	22.2047	24.4781	22.0162
ALG13	16.5201	18.9663	19.0796	17.3456	17.853	17.4626	ALG13	17.0758	16.4526	18.3985	17.8352	18.4057	16.4376	ALG13	8.48644	8.69262	7.95633	7.73906	8.5138	8.1272	ALG13	4.08404	3.76834	3.88701	3.73982	3.60601	3.82346
ALG14	10.2288	10.2116	10.1608	7.79687	8.94258	9.35766	ALG14	10.6841	8.10536	9.84545	9.44256	8.71267	8.40851	ALG14	51.2383	42.397	42.8798	48.9304	48.1339	42.259	ALG14	13.9553	13.3416	14.8371	12.9439	13.5232	14.6103
ALG14-AS1	0	0	0	0.059793	0	0	ALG14-AS1	0	0	0.115913	0	0	0.046711
ALG1L1P	0.466967	0.211943	0.693726	0.475235	0.124295	0.661244	ALG1L1P	0	0	0.108867	0.421453	0.076366	0.086208
ALG1L2	0	0.06071	0.135618	0.070878	0	0	ALG1L2	0.595224	0.333522	0.384782	0.441559	0.401155	0
ALG1L9P	0.340193	0.171584	0.227971	0.151129	0.20138	0.263751	ALG1L9P	0.20714	0.174787	0.310334	0.180164	0.420386	0.104265
ALG2	27.9421	27.9212	27.1472	28.2664	26.2038	27.8341	ALG2	28.6929	30.7164	29.7887	28.9886	28.4884	28.6029	ALG2	18.7667	18.5957	19.4576	18.9821	17.7643	20.4065	ALG2	10.5566	10.1449	10.9287	10.5098	9.0797	10.4236
ALG3	89.8738	90.9515	89.2708	87.7413	85.9433	82.9374	ALG3	62.8569	59.2882	60.2238	61.5078	53.8605	57.6706	ALG3	39.1287	41.605	44.4489	38.8601	40.9585	37.2633	ALG3	42.7577	44.8153	45.4373	42.0089	46.9269	40.0536
ALG5	48.5821	50.7254	49.2131	47.719	44.3545	44.8773	ALG5	50.4843	52.509	51.2524	50.3668	51.6282	52.5344	ALG5	74.911	85.7548	73.7054	81.4398	77.0042	76.4733	ALG5	56.1058	60.9261	53.5527	51.8498	54.7362	61.5874
ALG6	7.10297	7.16669	7.10066	6.76345	7.71872	6.40364	ALG6	8.02036	8.30105	8.04058	8.58897	8.76274	7.28477	ALG6	13.3101	13.131	13.8452	11.6104	14.3934	14.6352	ALG6	20.2062	20.0153	20.8235	20.0773	20.3994	19.1105
ALG8	100.126	101.412	96.2972	102.727	95.9463	103.825	ALG8	42.3248	38.4157	40.5986	35.8058	35.7099	39.2468	ALG8	26.891	25.6943	24.0856	23.9715	25.2754	24.6923	ALG8	19.5623	20.4931	20.8086	20.4754	20.4051	18.9462
ALG9	17.7605	19.3216	17.3149	17.8457	17.8521	18.3526	ALG9	20.187	20.1192	19.3321	18.5485	20.8552	17.9186	ALG9	10.8168	10.7144	10.9251	9.47738	10.1888	10.2805
ALK	0.027529	0.032851	0.013897	0.024293	0.039553	0	ALK	0.162909	0.087465	0.087704	0.070227	0	0.072677	ALK	0.010177	0	0.032105	0	0.008465	0
ALKAL1	0.32477	0.096074	0.265562	0.113996	0.691651	0.278943	ALKAL1	0	0	0	0	0	0
ALKAL2	0	0	0	0	0	0	ALKAL2	0.099203	0	0	0	0	0								ALKAL2	6.00048	4.64011	5.27215	5.1263	5.48349	5.69663
ALKBH1	16.8654	14.8305	18.8555	14.9201	15.0756	16.7263	ALKBH1	13.1317	11.0061	11.0804	10.6216	10.8476	12.7038	ALKBH1	8.3118	8.11211	8.61444	8.40231	7.06568	8.95869	ALKBH1	6.85575	6.89994	7.26499	6.61352	6.07863	7.297
ALKBH2	45.485	49.6422	48.2179	49.4311	45.2803	37.3822	ALKBH2	28.5436	26.7464	21.3251	25.0914	23.3629	22.2654	ALKBH2	12.9784	15.5963	15.1851	12.2749	14.284	15.9912	ALKBH2	5.33957	5.21986	5.34628	5.20416	5.52247	5.01152
ALKBH3	21.6695	23.1476	21.5458	22.5634	21.2493	21.5873	ALKBH3	22.0665	20.1595	22.9897	21.3962	20.829	21.7032	ALKBH3	36.2002	35.5887	36.2524	38.2146	36.2795	33.4407	ALKBH3	14.2067	14.4449	15.1137	14.1353	14.0519	14.3892
ALKBH3-AS1	0	0	0	0	0	0	ALKBH3-AS1	0	0	0.030535	0	0	0
ALKBH4	13.0713	13.3362	13.6955	13.6378	11.9213	12.9473	ALKBH4	13.7404	12.8255	12.3067	13.4782	13.0094	13.3512	ALKBH4	79.5614	79.7894	77.1904	77.5714	74.1768	79.2858	ALKBH4	28.7344	29.4287	28.5384	28.3215	26.7208	27.9872
ALKBH5	86.8015	83.8777	86.7277	81.742	75.534	83.4509	ALKBH5	44.846	43.6791	45.5242	39.5968	43.409	41.3045	ALKBH5	46.0719	47.6743	47.5928	49.5702	46.2339	46.6824	ALKBH5	23.2742	22.8848	23.4519	21.3315	22.4949	23.9255
ALKBH6	35.837	36.3023	30.9551	33.2917	34.9241	40.7536	ALKBH6	25.9236	25.14	23.9837	26.2996	25.063	25.0962	ALKBH6	28.7922	27.3791	24.1879	24.7936	27.6257	25.8876	ALKBH6	30.6354	33.4915	29.0507	29.8384	31.3992	28.799
ALKBH7	60.7924	61.9658	60.4457	56.0102	56.4687	53.6327	ALKBH7	71.1013	64.9996	65.8857	64.1547	56.9929	64.1238	ALKBH7	72.6558	78.7309	82.9895	82.6691	74.8278	71.8175	ALKBH7	48.3011	43.9442	44.4723	49.4701	41.6308	40.641
ALKBH8	4.62859	4.08694	4.33927	4.65858	4.18749	4.17116	ALKBH8	5.4951	6.09799	5.25877	5.93617	5.77054	6.29877	LOC107196650	5.20828	4.53435	4.08558	3.32584	4.48035	3.57642	ALKBH8	7.15196	6.82939	8.15002	7.14466	6.83193	7.15732
ALLC	0	0	0	0.028945	0	0	ALLC	0.036308	0	0.042252	0	0	0	ALLC	0	0.04435	0	0	0	0	ALLC	0	0.040836	0	0	0	0.067013
ALMS1	2.47363	2.44193	1.96482	2.34806	2.6274	2.6018	ALMS1	3.44552	3.36714	3.59605	3.10311	3.61152	3.00894	ALMS1	5.32167	4.26806	4.52112	4.66834	5.04634	5.25486	ALMS1	2.70336	2.04653	2.79494	2.04283	2.91705	3.55116
ALMS1-IT1	0.15683	0.31901	0.064354	0.232479	0.453334	0.202619	ALMS1-IT1	0.086761	0.168034	0.03368	0.121278	0.277427	0.135655
ALMS1P1	0	0.065943	0	0.039314	0.039228	0.113955	ALMS1P1	0	0.031633	0.113518	0	0	0.03084
ALOX12	0	0	0	0.02733	0	0	ALOX12	0	0	0	0	0.02443	0	ALOX12	0.025192	0	0	0	0	0	ALOX12	0	0	0	0	0	0
ALOX12-AS1	3.86488	3.15261	2.49434	1.7263	3.40158	2.04521	ALOX12-AS1	2.5843	2.21215	2.21469	2.38638	3.04499	1.87636
ALOX12B	0.585082	0.806598	0.918336	0.46949	0.71042	0.6652	ALOX12B	0.118129	0.362527	0.160645	0.165337	0.125996	0.240278	ALOX12B	0	0	0	0	0	0	LOC103296882	0.067604	0.052937	0.023173	0.028128	0	0
ALOX12P2	0.802982	0.681922	0.801788	0.81625	0.97253	0.840274	ALOX12P2	1.37278	1.40096	0.905892	1.41326	1.50189	0.977645
ALOX15	0	0.036494	0.020285	0.130658	0	0.063838	ALOX15	0	0.017709	0	0	0	0	ALOX15	0.822234	0.444647	0.782043	0.658609	0.452346	0.374542	ALOX15	146.023	144.589	149.278	146.33	145.332	148.434
ALOX15B	0	0	0.044492	0	0	0	ALOX15B	0.02003	0	0	0	0	0
ALOX15P1	0	0	0	0	0	0	ALOX15P1	0.091731	0	0	0	0	0
ALOX5	1.82903	1.86574	1.00409	1.77513	2.19853	1.81619	ALOX5	1.48266	1.38367	1.1065	1.85358	1.55411	1.34696	ALOX5	0	0.038582	0.023771	0	0	0	ALOX5	2.65489	2.37844	2.4459	2.94408	1.17189	2.04669
ALOX5AP	0.801823	1.30782	0.940803	1.82442	1.0444	1.36685	ALOX5AP	1.62612	0.318347	1.07139	1.0831	1.308	0.905233	ALOX5AP	0	0	0	0	0	0.079454	ALOX5AP	0	0	0	0	0	0
ALOXE3	0.559838	0.567541	0.375356	0.479211	0.351761	0.34001	ALOXE3	0.273854	0.104348	0.215254	0.172269	0.098431	0.144395	ALOXE3	0.05991	0.101772	0.094338	0	0.0497	0.045188	ALOXE3	0.51166	0.346405	0.239536	0.174283	0.270917	0.195112
ALPG	0.192178	0.04313	0.154577	0.084392	0.091744	0.091227	ALPG	0	0	0	0	0	0
ALPI	0	0	0.033366	0	0	0	ALPI	0	0	0	0	0	0								ALPI	0	0	0	0	0.041383	0
ALPI	0	0	0.033366	0	0	0	ALPI	0	0	0	0	0	0								LOC103283437	0.061825	0.036262	0	0.077118	0.041386	0.029773
ALPK1	4.87882	5.03262	4.39304	6.35489	7.15137	6.94184	ALPK1	5.54234	5.47499	4.85857	5.64007	5.76346	5.34515	ALPK1	0.270492	0.120333	0.108253	0.171918	0.160462	0.194457	ALPK1	0.021325	0.012547	0.043973	0.013322	0.043061	0
ALPK2	31.9154	27.3784	29.0313	35.3723	26.6155	28.7956	ALPK2	0.540231	0.462473	0.504433	0.445595	0.434271	0.430019	ALPK2	0.060739	0.064464	0.055934	0.076334	0.03794	0.007656	ALPK2	9.94087	8.30571	9.38331	9.18453	9.7795	11.1066
ALPK3	0.15401	0.077481	0.081274	0.125436	0.09892	0.143783	ALPK3	0.077991	0.048968	0.037489	0.038607	0.048986	0.038805	ALPK3	0.390765	0.376462	0.407088	0.38853	0.490846	0.359029	ALPK3	0.153333	0.150416	0.087871	0.159679	0.217938	0.024795
ALPL	0.131897	0.068902	0.331641	0.150075	0.258164	0.026766	ALPL	0.160692	0.266894	0.240747	0.064231	0.122394	0.172363	ALPL	0.164459	0.139812	0.102958	0.359929	0.243258	0.26295	ALPL	0.026765	0.031417	0.027498	0.100191	0.071737	0.232315
ALPP	0.165098	0.371636	0.317386	0.328786	0.218332	0.271798	ALPP	0	0.03465	0	0	0	0.033553
ALS2	9.24675	10.1698	8.99616	10.0456	9.09805	9.02019	ALS2	20.3279	19.774	20.5617	19.502	20.0932	18.697	ALS2	5.77197	5.52571	5.77234	5.68494	5.95462	5.77512	ALS2	9.05221	8.06039	9.56292	8.35056	9.47521	10.0027
ALS2CL	1.5687	1.61049	1.34283	1.30048	1.65508	1.72696	ALS2CL	21.0142	19.3734	19.1316	20.6364	20.1693	18.9525	ALS2CL	2.49832	2.80727	3.73323	2.86084	2.90636	3.03803	ALS2CL	0.37661	0.391814	0.343207	0.199018	0.253164	0.336627
ALX1	21.839	23.271	22.5812	24.9944	21.4659	22.2693	ALX1	0	0	0	0	0	0	ALX1	0	0	0	0	0	0	ALX1	0	0	0	0	0	0
ALX3	0	0	0	0	0	0	ALX3	0	0	0	0	0.08271	0	ALX3	0	0	0	0.0652	0	0	ALX3	0.029188	0.068497	0.029972	0	0	0
ALX4	3.33054	3.58023	3.02976	3.41095	3.62747	3.34094	ALX4	0	0	0	0	0	0	ALX4	0	0	0	0	0.024776	0	ALX4	0	0	0	0	0	0
ALYREF	255.205	261.848	260.946	241.481	248.186	266.139	ALYREF	119.064	121.404	124.38	121.056	129.919	121.735	ALYREF	321.048	330.985	347.206	376.896	347.435	349.565	ALYREF	235.738	238.559	227.462	235.411	224.709	234.114
AMACR	15.1954	13.5652	14.7138	16.0509	14.6737	15.0571	AMACR	22.0119	22.0564	22.0915	21.6653	22.4129	21.4989								AMACR	24.8041	25.7354	26.0247	22.2894	23.7814	24.1904
AMBN	0	0	0	0	0.030302	0	AMBN	0	0	0	0	0	0	AMBN	0	0	0	0	0	0	AMBN	0	0	0	0	0	0
AMBP	17.4481	17.4614	18.4301	16.9466	16.3111	17.473	AMBP	4.4787	4.12789	4.17697	4.8342	4.67908	5.30623	AMBP	0.63388	0.485727	0.196382	0.135393	0.307583	0.751966	AMBP	0	0	0	0	0	0
AMBRA1	19.8361	19.1618	18.7674	26.3329	24.8977	24.4411	AMBRA1	17.6354	16.6158	17.9533	16.6323	18.0317	16.527	AMBRA1	29.444	28.3815	28.3357	28.2797	28.0825	28.432	AMBRA1	17.1651	17.7186	17.2555	16.0143	17.4242	18.0097
AMD1	69.2079	66.4963	67.9549	55.6916	58.006	59.8929	AMD1	95.2498	93.3371	98.8243	91.8171	94.6637	93.0424	AMD1	59.4394	57.1747	61.1185	63.3669	60.2567	61.5467	AMD1	97.8116	89.4582	101.254	81.3209	92.7794	91.0935
AMD1	69.2079	66.4963	67.9549	55.6916	58.006	59.8929	AMD1	95.2498	93.3371	98.8243	91.8171	94.6637	93.0424	AMD1	59.4394	57.1747	61.1185	63.3669	60.2567	61.5467	LOC103287526	0	0	0	0.097716	0	0.149141
AMDHD1	4.28125	4.02044	3.64381	3.32107	4.08114	4.2408	AMDHD1	0.11227	0.152289	0	0.094245	0.047889	0.12645	AMDHD1	0	0.223509	0.264424	0.132838	0.102329	0.126436	AMDHD1	0.022153	0.026022	0.068348	0.027653	0.059448	0.085589
AMDHD2	8.72549	9.17737	9.34783	7.62573	10.1708	10.3347	AMDHD2	28.6015	27.5631	27.6671	26.0826	25.823	26.2943	AMDHD2	39.3714	42.8254	42.0375	35.8809	38.8796	39.1545	AMDHD2	11.8886	11.8964	10.2539	10.9638	12.286	11.3313
AMELX	0	0	0	0	0	0	AMELX	0	0	0	0	0	0								AMELX	0	0	0	0	0	0
AMELY	0	0	0	0	0	0	AMELY	0	0	0	0	0	0	AMELX	0	0	0	0	0	0
AMER1	1.58184	1.51025	1.35376	2.13349	2.42548	2.36981	AMER1	1.56463	1.2731	1.50572	1.61986	1.39494	1.3332	AMER1	2.544	2.52138	2.67488	3.0281	2.76233	2.86532	AMER1	2.48596	2.66258	2.77594	2.81034	3.26804	3.36268
AMER2	0	0	0	0	0	0	AMER2	0	0	0	0.014326	0	0	AMER2	0.136279	0.036539	0.120798	0.184353	0.131452	0.137441	AMER2	0.651161	0.53102	0.668561	0.326584	0.550742	0.401151
AMER3	0	0	0	0	0	0	AMER3	0	0	0	0	0	0	AMER3	0	0	0	0	0	0	AMER3	0	0	0	0	0	0
AMFR	86.7954	86.2037	83.744	80.4966	77.3334	81.474	AMFR	68.2912	69.9241	68.0853	67.2468	68.5091	66.9026	AMFR	158.37	156.481	158.51	154.046	153.89	156.727	AMFR	127.658	124.629	124.109	121.835	124.301	126.997
AMH	4.4708	4.85014	4.88922	3.82291	5.09261	4.60485	AMH	1.32362	1.20042	0.918624	1.53545	1.05151	1.1097	AMH	0	0	0.033156	0.034791	0.026118	0	AMH	0	0	0	0	0.076981	0
AMHR2	0.084114	0.307364	0.138007	0.14516	0	0.108525	AMHR2	0	0	0.06953	0	0	0	AMHR2	0.08393	0.085519	0.12374	0.074958	0.111796	0.067694	AMHR2	0.03815	0	0.039097	0.047559	0.050976	0.036656
AMIGO1	1.10229	0.926692	1.20734	0.86413	0.826415	0.824735	AMIGO1	6.81567	6.56534	6.59064	5.88581	6.44451	6.42268	AMIGO1	1.52814	1.39123	1.83495	1.60537	1.39146	1.48914	AMIGO1	5.73044	4.84137	5.1244	5.17427	5.40447	5.05953
AMIGO2	431.878	428.772	407.189	476.012	436.248	413.731	AMIGO2	241.523	244.588	249.502	237.805	235.865	241.453	AMIGO2	192.266	174.466	190.585	188.047	178.933	192.326	AMIGO2	0	0	0	0	0	0
AMIGO3	3.47958	3.46638	3.12991	2.97013	3.16126	3.54267	AMIGO3	3.11138	3.19924	2.88607	2.81593	3.4292	3.38952	AMIGO3	35.66	33.6352	36.1813	34.933	34.4472	35.1251	AMIGO3	28.2715	25.5065	26.9638	24.1209	26.8679	28.1994
AMMECR1	12.0028	12.6357	12.2862	13.7629	13.0833	11.9897	AMMECR1	18.0054	17.3146	19.1066	16.6444	17.0325	16.3611	AMMECR1	6.34809	6.11909	5.69947	5.55802	5.94314	5.76508	AMMECR1	14.7441	13.9001	16.1466	16.758	16.5486	17.231
AMMECR1L	13.6446	13.5379	12.6865	14.333	12.1918	13.293	AMMECR1L	23.1899	22.122	21.3224	19.3783	20.7837	21.4907	AMMECR1L	41.6991	40.11	42.8585	44.2266	41.6734	41.559	AMMECR1L	46.3907	43.0367	47.0166	40.4907	48.4012	51.5189
AMN	0.136259	0.451886	0.223454	0.039973	0.282621	0.195469	AMN	1.08346	1.00356	1.05108	1.2614	1.35408	1.48872	AMN	1.5658	1.211	0.788226	0.923735	1.47035	0.990593	AMN	0.196105	0.132186	0.077079	0	0.1005	0
AMN1	11.2909	11.7912	12.9144	11.2577	10.814	11.1462	AMN1	5.02166	5.01909	5.86853	5.3564	5.29786	5.4973	AMN1	3.68268	3.36352	3.8514	3.3058	3.77169	3.53521	AMN1	14.9764	14.9064	14.4477	11.6731	13.7418	13.1972
AMOT	0.073932	0.065867	0.093544	0.056215	0.059493	0.072059	AMOT	17.5711	16.6116	17.5654	16.5891	17.3154	15.352	AMOT	7.74597	7.17924	6.92123	7.55527	7.14112	7.08395	AMOT	8.26827	8.16632	8.38066	7.48733	8.45858	9.37663
AMOTL1	13.5844	11.4079	11.37	11.1252	11.0712	10.4443	AMOTL1	35.7746	33.3035	35.5632	35.2943	36.2446	31.454	AMOTL1	25.4056	22.3697	24.7575	25.2079	25.9897	24.705	AMOTL1	29.425	27.0463	30.0471	25.8761	30.1853	36.9881
AMOTL2	55.9682	56.0569	57.655	73.9592	53.2923	53.984	AMOTL2	55.3907	54.4029	55.7106	55.1708	54.6254	52.2571	AMOTL2	70.7284	67.7038	78.1737	74.841	72.8431	73.4116	AMOTL2	221.26	215.117	226.071	197.909	234.588	239.753
AMPD1	0	0	0	0	0	0	AMPD1	0	0	0.02499	0	0	0	AMPD1	0	0	0	0	0	0	AMPD1	0.021562	0	0	0	0	0
AMPD2	23.6391	20.9311	23.1539	21.2577	20.6436	22.7967	AMPD2	37.2942	34.4865	35.7978	31.2925	30.8173	32.4048	AMPD2	14.7523	14.4574	15.2477	14.8312	14.6327	15.2584	AMPD2	30.3264	28.6142	29.1202	26.019	28.0552	29.6525
AMPD3	2.39803	2.09037	2.31868	1.99232	1.75289	1.72936	AMPD3	1.12501	1.305	1.22239	1.14371	1.15359	1.02573	AMPD3	2.12412	2.30469	2.24388	1.7167	2.28242	2.40164	AMPD3	0.582966	0.571577	0.765141	0.665685	0.82484	0.781602
AMPH	0.38284	0.290799	0.402496	0.534686	0.453164	0.519595	AMPH	0	0	0	0	0	0	AMPH	0.061351	0.104301	0.064061	0	0.050473	0.028573	AMPH	0	0	0	0	0.063303	0.045565
AMT	0.079218	0.178488	0.061899	0.132882	0.14091	0.259838	AMT	0.280074	0.172643	0.235481	0.466777	0.177948	0.27405	AMT	2.49722	2.34672	2.38956	2.36242	2.66021	2.57827
AMTN	0.151155	0.055889	0.185119	0.066215	0	0.129676	AMTN	0.05517	0	0	0	0	0	AMTN	0	0	0	0	0	0	AMTN	26.0542	27.1685	29.5884	34.0046	28.9667	26.0645
AMY1A	0	0	0	0	0	0.045784	AMY1A	0	0	0	0	0	0								LOC103291131	1.43059	1.55244	1.55288	1.11144	1.30217	1.6399
AMY1B	0	0	0.03659	0	0	0	AMY1B	0	0	0	0	0	0	LOC102885857	0.121029	0.241319	0.369852	0.348677	0.291733	0.177102
AMY1C	0	0	0	0	0	0	AMY1C	0	0	0	0	0	0
AMY2A	0	0	0	0	0	0	AMY2A	0	0	0.040363	0.169542	0	0
AMY2B	0.553295	0.356745	0.516415	0.818926	0.483093	0.412842	AMY2B	1.23275	0.80678	1.14137	0.888145	0.625532	1.00231
AMZ1	0	0.064801	0.076089	0.015444	0.041341	0.057932	AMZ1	1.84639	1.67484	1.78729	1.59485	1.94393	1.87544	AMZ1	0.066967	0.037934	0.023375	0.049274	0.110676	0.089563
AMZ2	122.284	130.844	126.897	113.066	125.292	118.683	AMZ2	56.3673	58.845	58.8548	61.7802	57.3215	56.3445	AMZ2	17.4441	17.7639	17.102	18.0245	19.5284	18.4465	AMZ2	22.0855	25.0421	22.824	22.6909	24.2317	20.6244
AMZ2P1	4.88354	5.39743	4.76271	4.69995	5.23266	4.92329	AMZ2P1	1.29437	1.18592	1.18216	1.01387	0.993351	1.05386
ANAPC1	22.2816	21.4952	20.3101	22.7018	21.9871	22.6167	ANAPC1	23.2338	22.2841	23.3523	21.0206	23.968	21.6407	ANAPC1	39.5563	37.6455	38.023	36.5309	37.6784	38.1128	ANAPC1	24.2087	25.3863	24.8809	22.6678	25.2427	24.0917
ANAPC10	11.4892	11.4699	11.9594	11.2518	12.0218	11.1341	ANAPC10	14.4326	15.3631	13.6719	15.1988	14.3897	15.9411	ANAPC10	26.5089	23.3525	27.7173	22.8607	23.2808	26.5877	ANAPC10	15.1274	15.8036	17.1647	12.8424	15.5693	15.1244
ANAPC10	11.4892	11.4699	11.9594	11.2518	12.0218	11.1341	ANAPC10	14.4326	15.3631	13.6719	15.1988	14.3897	15.9411	LOC102891746	0	0	0	0	0	0	ANAPC10	15.1274	15.8036	17.1647	12.8424	15.5693	15.1244
ANAPC11	383.459	415.363	415.93	346.202	382.55	366.931	ANAPC11	138.829	139.873	137.544	138.051	149.258	141.89
ANAPC13	72.0957	72.893	68.0206	66.5283	67.3373	70.5356	ANAPC13	109.449	115.584	109.846	112.728	110.776	116.009	ANAPC13	115.283	121.362	118.66	123.46	120.202	128.243	ANAPC13	115.22	121.886	120.437	115.139	116.351	106.526
ANAPC15	93.8535	106.529	97.7029	92.0547	98.7022	91.5339	ANAPC15	90.0882	95.8965	96.145	94.1076	95.2252	93.7293	ANAPC15	28.4618	25.8557	25.5928	26.4571	27.4518	29.8265	ANAPC15	125.957	119.97	119.757	114.616	129.819	114.74
ANAPC15	93.8535	106.529	97.7029	92.0547	98.7022	91.5339	ANAPC15	90.0882	95.8965	96.145	94.1076	95.2252	93.7293	ANAPC15	28.4618	25.8557	25.5928	26.4571	27.4518	29.8265	LOC129148615	0	0	0	0	0	0
ANAPC16	65.1926	66.2497	66.2006	62.8681	64.2712	64.8495	ANAPC16	59.6698	61.5522	59.9734	63.2599	63.0811	61.97	ANAPC16	112.116	110.872	111.976	107.631	107.195	115.497	ANAPC16	82.6737	84.707	86.3632	81.5949	81.3785	79.4148
ANAPC1P1	0.434981	0.444394	0.403105	0.137442	0.548999	0.64844	ANAPC1P1	0.090494	0.179038	0.03901	0	0.167217	0.123484
ANAPC1P2	10.2471	9.92081	9.9858	9.10829	7.65726	7.57082	ANAPC1P2	5.25419	5.08917	3.87524	4.47187	4.50516	5.51017
ANAPC1P4	4.63006	4.92573	4.87218	5.21928	4.9113	4.39652	ANAPC1P4	5.45342	4.32843	6.83669	5.98606	6.09091	6.29554
ANAPC1P6	0	0	0	0	0	0	ANAPC1P6	0	0	0	0	0	0
ANAPC2	36.3184	38.3327	37.9217	35.6933	37.1464	40.3115	ANAPC2	33.1242	30.8795	31.4791	32.0945	31.9568	31.9568	ANAPC2	33.047	31.9879	34.7982	30.8008	33.1303	33.3556	ANAPC2	24.8144	22.3589	24.9375	22.3666	23.2697	25.5897
ANAPC4	12.2635	12.9078	11.9008	13.1269	12.6577	12.8878	ANAPC4	15.4429	14.5459	14.9542	14.9344	15.1093	13.718	ANAPC4	92.4773	87.5216	85.68	91.5986	90.443	89.3614	ANAPC4	33.8406	36.4479	37.3595	33.5167	36.219	35.7312
ANAPC5	95.7813	100.347	92.3297	89.756	95.8622	93.4125	ANAPC5	63.1722	66.227	63.4645	62.7987	59.9597	59.6924	ANAPC5	44.443	44.0629	43.809	44.7771	43.6193	45.8655	ANAPC5	15.5436	16.4028	17.6218	15.6403	16.405	15.7771
ANAPC7	47.808	47.8821	50.2945	46.8521	49.0147	46.4032	ANAPC7	38.8569	36.775	35.3051	32.8344	34.6353	35.2499	ANAPC7	55.2911	52.6491	59.0705	56.6008	52.3628	57.6122	ANAPC7	73.0632	70.801	74.4117	67.7101	80.8374	77.6012
ANG	29.4942	24.7619	27.3325	24.9203	28.3094	32.6634	ANG	1.65361	1.62241	1.05904	0.956225	1.67819	1.51052	ANG	11.948	12.1825	10.3052	11.8186	11.295	13.0684
ANG	29.4942	24.7619	27.3325	24.9203	28.3094	32.6634	ANG	1.65361	1.62241	1.05904	0.956225	1.67819	1.51052	LOC102896280	0.317741	0.271326	0	0	0.367857	0.304174
ANGEL1	11.4037	11.4502	10.5785	10.8496	10.233	10.1711	ANGEL1	7.9205	7.41851	6.95131	7.25091	6.95355	6.84991	ANGEL1	4.3079	5.36407	4.20796	4.06781	5.40807	4.80884	ANGEL1	4.52777	4.13037	4.69971	4.1901	5.19895	4.91408
ANGEL2	19.1142	19.8712	15.3099	17.5515	18.7562	18.9602	ANGEL2	15.6185	16.9624	16.5254	16.826	17.0413	14.4715	ANGEL2	16.1533	15.4883	14.5802	14.3611	14.6597	15.5995	ANGEL2	8.88016	8.78798	9.48591	8.1314	9.68183	9.42444
ANGPT1	1.10644	1.68318	0.901612	1.18413	1.38117	1.64036	ANGPT1	0.170742	0.251285	0.400393	0.143549	0.109333	0.278053	ANGPT1	156.555	146.792	145.637	144.914	144.652	155.248	ANGPT1	5.38774	6.49584	6.10762	4.9718	5.61073	6.57709
ANGPT2	0.022499	0.014012	0	0.033502	0.050875	0.014776	ANGPT2	0.012479	0.072678	0	0	0.100025	0.020742	ANGPT2	0.033061	0.009359	0	0.024553	0.009162	0.011099	ANGPT2	42.7701	36.0928	41.7784	34.0827	39.2876	42.0511
ANGPT4	0	0	0.011726	0.025177	0	0	ANGPT4	0.072581	0.09942	0.098198	0.088938	0.090426	0.079066	ANGPT4	0.23271	0.690623	0.56112	0.673726	0.509134	0.45953	ANGPT4	0.23565	0.319594	0.410493	0.407423	0.243473	0.280507
ANGPTL1	0	0	0	0.084267	0.07061	0.20759	ANGPTL1	0.146962	0.099739	0	0.144083	0.109764	0.151818	ANGPTL1	0	0	0	0	0	0	ANGPTL1	0	0	0	0	0	0
ANGPTL2	0	0	0	0.033603	0	0	ANGPTL2	1.62712	1.59953	1.61977	1.74567	1.32556	1.43237	ANGPTL2	6.36569	6.5623	5.9695	5.35663	5.11508	6.63409	ANGPTL2	2.42322	2.3649	2.35978	1.96258	2.22033	2.60531
ANGPTL3	0	0	0	0	0	0	ANGPTL3	0	0	0.019534	0.023458	0.017873	0	ANGPTL3	0	0	0	0	0	0	ANGPTL3	0.187376	0.043914	0.192054	0.14016	0	0.108048
ANGPTL4	8.83857	3.16489	4.66522	5.16328	4.07677	9.91148	ANGPTL4	13.9219	12.3739	13.5919	14.1762	12.4244	16.2656	ANGPTL4	1.59322	1.53765	1.43984	1.69238	1.53589	1.64952	ANGPTL4	9.20435	8.65602	9.40239	13.1402	6.68343	7.54726
ANGPTL5	0.035156	0.02306	0.028869	0	0	0	ANGPTL5	0	0	0.026856	0	0.024576	0.039433	ANGPTL5	0.47002	0.542304	0.350501	0.469614	0.335929	0.551516	ANGPTL5	0.037507	0	0.076886	0	0.050124	0.036046
ANGPTL6	0.116224	0.257906	0.158984	0.136519	0	0.133481	ANGPTL6	0.200062	0.166064	0.099855	0.119858	0.091391	0.348567	ANGPTL6	0.383185	0.503492	0.290582	0.266416	0.343152	0.278291	ANGPTL6	2.2959	2.52288	1.80232	2.19172	1.87051	2.31113
ANGPTL7	0	0	0	0	0	0	ANGPTL7	0	0.021777	0	0	0	0.051656	ANGPTL7	0	0	0	0	0	0	ANGPTL7	0.384139	0.150328	0.263172	0.383496	0.308973	0.247076
ANGPTL8	0	0	0.073611	0	0	0	ANGPTL8	0	0.190199	0	0	0	0	ANGPTL8	0.04771	0	0	0	0	0	ANGPTL8	12.1186	8.60855	11.6728	7.66676	8.92964	10.7693
ANHX	0	0	0	0	0	0	ANHX	0	0	0	0	0	0	ANHX	0	0.015607	0.019263	0	0	0.037028	ANHX	0	0	0	0	0	0
ANK1	6.38761	5.25219	6.27285	6.44034	3.90986	5.81307	ANK1	2.84419	2.37292	2.0813	2.48027	2.39558	2.04129	ANK1	0.631011	0.489317	0.622427	0.520382	0.592531	0.527778	ANK1	0.067719	0.035435	0.085396	0	0	0.021908
ANK2	2.49016	2.45057	2.23466	2.56411	2.8485	2.60192	ANK2	0.627041	0.513611	0.538099	0.418952	0.63627	0.48891	ANK2	4.1112	3.98164	3.7628	3.68563	4.0886	3.9014	ANK2	3.55325	3.08804	3.65623	3.17583	3.77866	4.07936
ANK2-AS1	0	0	0	0	0.078157	0	ANK2-AS1	0	0	0	0	0	0
ANK3	3.89746	3.184	3.08412	3.54828	3.6665	3.59577	ANK3	2.7418	2.58509	2.91137	2.90734	2.5229	2.95038	ANK3	161.084	151.641	145.48	148.86	150.784	156.72	ANK3	3.79989	3.7665	4.13732	4.01492	4.13304	4.58192
ANK3-DT	0	0.267927	0	0	0	0	ANK3-DT	0	0	0	0	0	0
ANKAR	0.426673	0.614383	0.285654	0.378642	0.430229	0.335053	ANKAR	0.707334	0.614449	0.765589	0.567485	0.855551	0.510605	ANKAR	1.5422	1.98637	1.76447	1.35435	1.70466	1.59452	ANKAR	0.052718	0.037223	0.010871	0.013174	0.02838	0.010223
ANKDD1A	0.467557	0.635157	0.581993	0.601358	0.634457	0.611614	ANKDD1A	0.094886	0.152808	0.148505	0.110348	0.102699	0.237654	ANKDD1A	0.044915	0.038164	0.023516	0.074351	0.055669	0.067576	ANKDD1A	0	0.1942	0.475743	0.082616	0.310206	0.255021
ANKDD1B	0.0317	0.101504	0.104176	0.027956	0.028214	0.102701	ANKDD1B	2.36735	1.84834	2.47138	2.56426	1.76049	2.13055	ANKDD1B	0.028116	0	0.029384	0	0.046324	0	ANKDD1B	0	0	0	0	0	0
ANKEF1	13.3841	13.5322	13.0459	13.3959	12.8352	13.3833	ANKEF1	7.50127	7.66906	7.71751	7.85967	7.98029	7.0773	ANKEF1	0	0	0	0	0	0	ANKEF1	0	0	0	0	0	0
ANKFN1	0	0.004959	0.045421	0.031311	0.049961	0.047651	ANKFN1	0	0	0.006805	0.028614	0	0.004582	ANKFN1	0	0	0	0	0	0	ANKFN1	0	0	0	0	0	0
ANKFY1	37.8037	37.3003	34.0593	75.1156	71.3699	73.9424	ANKFY1	24.659	23.8195	24.3101	30.7424	31.5147	29.8986	ANKFY1	37.4055	33.4843	32.9394	36.1041	37.3199	36.0144	ANKFY1	33.4454	33.5213	33.8515	34.5558	39.7796	42.9267
ANKH	21.1353	21.807	19.8048	18.4256	20.7316	19.9416	ANKH	0.246987	0.385543	0.346826	0.331255	0.463406	0.278114	ANKH	5.64742	5.35483	5.61597	4.61277	4.92255	5.44936	ANKH	8.48503	8.98585	9.27428	8.91536	9.49557	9.50572
ANKHD1	23.48	21.3871	21.1629	25.5567	21.9196	21.636	ANKHD1	15.5632	14.1802	14.4117	15.2574	16.0382	13.9244	LOC102883516	19.8374	19.125	19.4292	19.7778	20.296	20.314
ANKHD1-EIF4EBP3	13.3723	14.0133	13.0698	13.4735	15.421	14.8502	ANKHD1-EIF4EBP3	14.7847	13.1239	14.9467	12.7059	13.8548	12.4005								ANKHD1	15.0978	14.2052	16.3205	12.7601	16.4984	16.5174
ANKIB1	28.4603	27.4325	25.7544	32.4163	32.2561	30.9387	ANKIB1	29.6791	27.8705	30.402	31.9716	32.0743	32.5302	ANKIB1	22.7488	21.3143	21.9716	19.711	20.9514	21.8907	ANKIB1	15.6128	16.0043	17.5003	15.0382	17.6296	17.6484
ANKK1	0.056882	0.052602	0	0.037776	0	0.069386	ANKK1	0.019469	0.018777	0.022584	0	0.020665	0	ANKK1	0	0	0	0	0	0	ANKK1	11.9249	12.2635	12.3646	10.2821	13.2302	11.9259
ANKLE1	0.152775	0.084967	0.143263	0.119512	0.234911	0.157473	ANKLE1	0.057939	0.11719	0.063949	0.045833	0.059066	0.034179	ANKLE1	0.43095	0.418446	0.666574	0.181463	0.509223	0.329562	ANKLE1	5.1731	5.72413	5.56367	4.84113	5.56033	5.27461
ANKLE2	67.7442	62.6208	65.5944	64.5707	55.3045	59.5139	ANKLE2	57.5161	49.0939	52.4859	49.7708	52.6749	49.2138	ANKLE2	46.2338	43.395	46.4392	46.3382	45.6982	47.7475	ANKLE2	40.7144	36.8242	42.9229	34.3619	43.1866	44.5554
ANKMY1	6.59741	6.56571	6.70082	6.14436	7.18528	6.36029	ANKMY1	6.42759	6.71007	7.29931	8.13357	7.0012	6.70885	ANKMY1	0.229792	0.120127	0.055618	0.176252	0.161072	0.03552	ANKMY1	0.092812	0.093578	0.109301	0.066251	0.12482	0.089908
ANKMY2	18.4499	16.2013	17.0477	19.036	18.9255	19.1194	ANKMY2	28.1113	25.9247	27.8471	27.7805	27.3921	28.1483	ANKMY2	42.2373	38.0134	41.7151	41.321	40.6018	40.3386	ANKMY2	36.3615	37.1916	37.2876	33.8484	36.7816	36.8431
ANKRA2	8.75722	9.71763	9.6886	9.50422	10.1264	9.81902	ANKRA2	5.92408	5.32489	5.4253	6.58665	5.80016	5.76328	ANKRA2	10.0233	9.88076	8.59017	8.06603	10.2171	9.01503	ANKRA2	5.05829	5.0054	5.56104	4.13046	6.60996	4.83045
ANKRD1	17.8427	16.4843	21.1109	20.9248	12.7101	14.0748	ANKRD1	4.75819	4.63548	4.67875	4.54063	4.434	4.67781	ANKRD1	39.5817	32.9277	41.1605	43.7578	38.8373	40.4504	ANKRD1	31.9206	25.2625	26.243	22.2987	22.7942	28.2903
ANKRD10	36.4715	32.3029	35.0099	29.2569	29.5027	31.3351	ANKRD10	42.2292	37.8462	41.7164	41.2602	36.954	37.7602	ANKRD10	11.3144	10.8011	9.71148	9.02025	9.76301	10.3591	ANKRD10	17.6531	15.3212	19.5576	14.1803	16.7998	17.1208
ANKRD11	54.9046	50.4694	51.8435	50.6439	49.9235	47.4161	ANKRD11	45.2658	42.7041	46.8536	41.6479	46.2581	40.962	ANKRD11	25.1886	23.3496	23.6326	24.1475	25.069	25.4422	ANKRD11	26.5899	20.8804	30.0596	17.9052	29.1761	33.924
ANKRD12	6.15046	5.76809	6.02989	5.83141	6.50347	5.81433	ANKRD12	10.1923	9.23561	9.67316	9.6731	9.42168	8.47705	ANKRD12	9.7867	9.31568	8.99619	8.65154	9.45838	10.2265	ANKRD12	4.60691	3.52139	5.44054	2.51554	4.49773	5.51863
ANKRD13A	10.9976	10.5874	10.0126	10.8367	12.0031	10.5679	ANKRD13A	22.3264	21.1958	21.4387	20.1741	22.125	20.6719	ANKRD13A	68.7093	64.4345	69.6947	66.3048	69.2176	67.7916	ANKRD13A	45.6505	45.8068	48.1471	43.0773	48.5511	48.7815
ANKRD13B	13.5871	13.6634	14.0179	12.4249	11.6483	13.3217	ANKRD13B	8.05697	6.69951	7.59144	6.77849	5.59406	6.27747	ANKRD13B	3.1591	2.70559	2.47741	2.51269	2.66622	2.73513	ANKRD13B	1.29497	1.6059	1.90747	1.36503	1.14888	1.69011
ANKRD13C	19.8258	16.126	16.9575	16.6927	15.9819	14.7389	ANKRD13C	33.0556	31.2661	33.0141	28.8787	31.4144	29.47	ANKRD13C	36.5199	34.1139	32.3698	32.3863	33.1366	35.3532	ANKRD13C	23.0019	20.3631	24.0163	18.861	21.8776	22.9623
ANKRD13D	11.1907	10.9958	10.9705	9.96757	12.4631	12.1615	ANKRD13D	27.6749	24.3894	25.9476	26.6207	23.2578	24.3184	ANKRD13D	7.63907	8.46598	7.53293	6.43124	8.10581	7.35211	ANKRD13D	10.5638	10.5515	9.93104	8.80971	10.0352	9.13098
ANKRD16	10.051	10.5851	9.41764	10.104	10.3092	10.4332	ANKRD16	7.67367	8.75115	8.32617	7.35925	7.51856	6.71667	ANKRD16	5.89788	6.92128	5.61522	4.98793	5.12036	5.49274	ANKRD16	7.73481	7.38478	7.9692	7.81442	8.57646	7.57679
ANKRD17	23.1755	19.1082	18.3912	23.2198	18.4046	21.5898	ANKRD17	31.619	29.4742	31.2834	30.4404	31.6445	27.3033	ANKRD17	38.6598	35.4746	36.8253	37.0495	37.4727	40.2074	ANKRD17	34.8503	32.0297	34.6708	31.3568	35.258	38.6143
ANKRD17-DT	0.030647	0.035953	0.061386	0.055377	0.04007	0.045434	ANKRD17-DT	0.039662	0.052017	0.040325	0.042995	0.036992	0.050915
ANKRD18A	3.07471	3.49922	2.98215	3.04688	4.13428	3.44451	ANKRD18A	2.15081	2.25654	2.23006	2.15962	2.38781	1.81002
ANKRD18B	4.94359	4.3841	3.77745	4.53344	3.66876	3.83898	ANKRD18B	1.87997	1.47165	1.56363	1.45747	1.36769	1.63444
ANKRD18CP	0.133602	0.166006	0.368267	0.21353	0.181696	0.316266	ANKRD18CP	0.25464	0.158286	0.32419	0.399657	0.213956	0.308998
ANKRD18DP	0.045325	0.067088	0	0.060039	0	0.039109	ANKRD18DP	0	0.016282	0	0.024341	0	0
ANKRD19P	0.029465	0	0	0	0.026092	0.025372	ANKRD19P	0.021724	0.02146	0.127145	0.063875	0.095593	0.061386
ANKRD2	7.23378	6.28667	7.61006	8.29744	5.43166	5.8335	ANKRD2	7.28169	7.15314	6.52318	7.29403	6.46609	6.73208	ANKRD2	0.907909	1.09077	0.99609	1.09229	1.30249	1.05965	ANKRD2	0.355509	0.208069	0.27287	0.553693	0.237125	0.170445
ANKRD20A1	0.104058	0.303114	0.179618	0.320426	0.409864	0.277106	ANKRD20A1	0.56877	0.214446	0.70528	0.42455	0.422772	0.235308
ANKRD20A11P	0.090844	0.071654	0.070409	0.073653	0.084306	0	ANKRD20A11P	0	0	0.215243	0.350088	0.229434	0.138786
ANKRD20A12P	3.00574	1.70627	2.38863	2.40773	2.49012	2.16846	ANKRD20A12P	0.129716	0.079553	0.206251	0	0	0.091769
ANKRD20A19P	0.026712	0.009454	0	0.013206	0	0	ANKRD20A19P	0.028377	0.028179	0.011134	0.013163	0.01005	0.008817
ANKRD20A21P	0.048	0.036701	0.040344	0	0.060868	0.06245	ANKRD20A21P	0	0.017441	0.045191	0	0	0.015837
ANKRD20A2P	0.030549	0.231334	0.114878	0	0.329717	0.185146	ANKRD20A2P	0.175296	0.843468	0.615734	0.591269	0.191712	0.826357
ANKRD20A3P	0.33656	0	0.09567	0.226102	0.355009	0	ANKRD20A3P	0.325818	0.195365	0	0	0	0
ANKRD20A4-ANKRD20A20P	0.234047	0.270184	0.201538	0.124293	0	0.128036	ANKRD20A4-ANKRD20A20P	0.701076	0.693601	0.550768	0.940753	1.0821	0.526621
ANKRD20A5P	0.549458	0.536121	0.646163	0.672963	0.766513	0.574303	ANKRD20A5P	0.159302	0.293586	0.213364	0.018905	0.169947	0.186712
ANKRD20A8P	0.046305	0.10998	0.022059	0.123581	0.090758	0.046335	ANKRD20A8P	0.05423	0.040533	0.02309	0	0	0
ANKRD20A9P	0	0.058057	0.059908	0.074095	0.065968	0.020449	ANKRD20A9P	0.048222	0.044416	0.142979	0	0	0.038507
ANKRD22	0.607721	0.87341	0.986296	0.521754	0.766591	0.773229	ANKRD22	0.087649	0.133739	0.219122	0.228051	0.106896	0.223458	ANKRD22	0	0	0	0	0	0	ANKRD22	1.62823	1.22206	1.57044	2.00508	1.44185	1.53598
ANKRD23	0.568836	0.528118	0.567264	0.485783	0.62127	0.730461	ANKRD23	0.942829	0.606992	0.847207	0.805046	0.89856	0.610492	ANKRD23	0.587899	0.645899	0.55447	0.644085	0.666012	0.827615	ANKRD23	17.533	16.3645	17.35	14.9585	17.7023	17.367
ANKRD24	0.173723	0.231333	0.240884	0.092122	0.375518	0.224982	ANKRD24	0.286931	0.132968	0.225618	0.216785	0.241826	0.144697	ANKRD24	0.05389	0.011442	0.070753	0.05991	0.055928	0.054227	ANKRD24	0.459454	0.343889	0.45903	0.243476	0.430586	0.229232
ANKRD26	4.13345	3.96107	3.91052	4.30755	5.06303	4.19423	ANKRD26	4.61638	4.49584	4.72588	4.46905	4.89673	4.31803	ANKRD26	6.88739	6.71725	6.89061	6.17167	6.58666	7.31943
ANKRD26P1	0.020869	0	0	0	0	0.009016	ANKRD26P1	0	0	0	0	0	0
ANKRD26P3	0	0	0	0	0	0	ANKRD26P3	0	0	0	0	0	0
ANKRD27	26.7499	27.2787	25.6943	26.5437	26.0033	26.0133	ANKRD27	15.9714	16.0199	17.1415	15.9433	15.7855	16.2451	ANKRD27	23.0596	21.4853	21.4081	22.0381	21.8612	22.4118	ANKRD27	19.6109	17.8735	20.655	17.7973	19.3896	21.3312
ANKRD28	25.1044	24.9085	21.6794	25.1866	21.4207	22.0924	ANKRD28	29.177	25.8536	28.3317	26.7339	27.2159	25.6527	ANKRD28	17.1938	17.0133	17.3202	16.8515	17.287	17.3233	ANKRD28	75.6652	73.052	78.6206	66.2292	79.643	82.9785
ANKRD29	3.30081	4.93856	5.42021	4.44718	4.44993	3.96778	ANKRD29	6.2321	6.18332	5.6252	4.26132	3.55342	4.47545	ANKRD29	31.3989	29.4141	30.6215	31.3147	31.3777	29.6663	ANKRD29	0.027907	0.032751	0.057327	0.034818	0.074776	0.107616
ANKRD30A	4.37227	3.94759	3.57049	3.70863	4.68236	4.56998	ANKRD30A	0	0	0.006634	0.023602	0	0
ANKRD30B	0.09128	0.019323	0.053587	0.084978	0.048365	0.025589	ANKRD30B	0.01375	0	0.055311	0	0.017756	0.015053
ANKRD30BL	0	0	0	0	0.016285	0	ANKRD30BL	0	0	0.057708	0	0	0.067503
ANKRD30BP2	0	0	0.037836	0	0.058715	0	ANKRD30BP2	0.345512	0.303754	0.376929	0.641081	0.385627	0.269039
ANKRD30BP3	0	0	0	0	0	0	ANKRD30BP3	0	0	0	0	0	0
ANKRD31	0.196025	0.150252	0.226639	0.143848	0.16155	0.156531	ANKRD31	0.16166	0.088301	0.156197	0.133336	0.227501	0.111525	ANKRD31	2.52528	2.39578	2.26731	2.58913	2.15246	2.40576	ANKRD31	0	0.017643	0	0.009364	0.040367	0.007272
ANKRD33	0	0	0	0	0	0	ANKRD33	0	0	0	0	0	0	ANKRD33	0	0	0	0	0.09993	0	ANKRD33	0	0	0	0	0	0
ANKRD33B	2.16736	2.17396	2.19983	2.92917	1.8276	2.14167	ANKRD33B	12.0901	11.6484	12.7424	11.9852	12.5644	10.7943	ANKRD33B	36.8445	35.3324	37.2878	38.9819	37.6483	35.0817	ANKRD33B	21.2855	20.3322	21.0196	18.5086	21.9235	22.7169
ANKRD34A	0.561215	0.455356	0.46197	0.415955	0.274252	0.500627	ANKRD34A	0.42993	0.482011	0.407429	0.470515	0.372749	0.517366	ANKRD34A	0.092343	0.078436	0.048463	0.017083	0.089354	0.07738	ANKRD34A	3.24819	2.52549	2.66535	2.86122	2.69825	3.28952
ANKRD34B	0.044766	0.009261	0.072647	0.009903	0.054394	0	ANKRD34B	55.6955	51.0244	52.7744	50.4643	49.1921	49.4044	ANKRD34B	5.43617	5.37049	5.1686	4.2842	4.77259	5.12034	ANKRD34B	0	0	0	0	0	0
ANKRD34C	0	0	0	0	0	0	ANKRD34C	0	0	0	0	0	0
ANKRD34C-AS1	0	0	0	0	0	0	ANKRD34C-AS1	0	0	0	0	0	0
ANKRD35	0	0	0	0	0	0	ANKRD35	0	0.042116	0.018446	0.044303	0.067506	0.044563	ANKRD35	1.08753	1.1006	1.24293	1.16292	1.1578	1.39179	ANKRD35	2.91695	2.88533	2.50025	2.33534	3.47713	3.01834
ANKRD36	1.3189	1.25555	0.773888	1.42215	1.02349	1.24521	ANKRD36	1.76109	1.05353	1.79289	1.17978	1.55579	1.09539
ANKRD36-2	0.038044	0.033006	0.013398	0.042354	0.040883	0.012482	ANKRD36-2	0.071752	0.028	0	0.016508	0.066548	0.036513
ANKRD36B	2.35935	2.32635	1.21612	2.05944	2.59323	2.49963	ANKRD36B	2.42172	2.15407	2.4379	1.58271	2.28138	1.98757
ANKRD36B-2	0	0.046409	0.023143	0	0	0.045666	ANKRD36B-2	0	0.096413	0	0	0	0
ANKRD36BP1	0	0	0	0	0	0	ANKRD36BP1	0	0	0	0	0	0.025809
ANKRD36BP2	0.042951	0	0	0	0.036599	0.034707	ANKRD36BP2	0.257614	0.145976	0.251164	0.093734	0.034008	0.056376
ANKRD36C	0.278286	0.176319	0.29982	0.403938	0.382766	0.267104	ANKRD36C	0.309282	0.352649	0.417214	0.297011	0.480053	0.210203
ANKRD37	3.24092	3.37186	3.8175	3.8269	2.98045	3.8717	ANKRD37	2.05469	3.09774	2.18873	2.95808	2.87034	3.18473	ANKRD37	10.6763	10.5126	9.53857	9.80743	10.2044	10.0289	ANKRD37	12.7351	12.5424	13.5099	15.8206	11.3168	10.9317
ANKRD39	17.4677	19.8811	18.9599	16.1222	14.6145	17.9757	ANKRD39	23.244	27.0666	25.198	23.4467	23.1481	25.6938	ANKRD39	17.0198	19.7439	19.447	19.6097	19.4677	20.8816	ANKRD39	46.6882	43.6033	47.0882	43.7546	46.0344	40.5623
ANKRD40	57.4683	53.778	56.431	55.4746	51.4802	53.6718	ANKRD40	35.1347	35.0617	36.7209	34.6856	35.2798	33.9791	LOC102888382	47.519	48.2377	49.4499	50.6569	50.4442	49.7582	ANKRD40	32.4463	30.7504	33.5362	29.4709	32.2331	30.8482
ANKRD40CL	0.192275	0.213178	0.236232	0.083828	0.084973	0	ANKRD40CL	0.069688	0	0	0.291562	0.222527	0
ANKRD42	6.17669	6.06912	5.98044	6.19057	5.6346	6.71743	ANKRD42	16.4102	17.0549	16.1306	15.5371	16.8792	15.5574	ANKRD42	6.55263	6.06343	6.74837	6.65699	6.45767	7.36414	ANKRD42	7.17422	7.3997	7.61448	6.67167	7.77795	7.87672
ANKRD42-DT	2.84052	3.24357	3.76399	4.3236	4.53572	2.9136	ANKRD42-DT	1.35566	1.3182	1.77095	1.64543	2.78133	1.9576
ANKRD44	0.797629	0.768457	1.03536	0.63668	0.784351	1.07433	ANKRD44	10.7331	9.76511	9.68731	9.7187	9.86331	9.29745	ANKRD44	0.924288	0.943182	0.898967	1.10872	0.835595	1.04811	ANKRD44	2.98365	3.04687	3.54942	3.06638	3.28279	3.70446
ANKRD44-AS1	0	0	0	0	0	0	ANKRD44-AS1	0.641622	1.07591	0.553448	0.440657	0.676978	0.596178
ANKRD44-DT	0	0	0	0	0	0	ANKRD44-DT	0.027041	0	0	0	0	0
ANKRD44-IT1	0	0	0	0	0	0	ANKRD44-IT1	0	0	0	0	0.054815	0
ANKRD45	0.152596	0.077148	0.144204	0.184331	0.52247	0.173724	ANKRD45	0.201945	0.047848	0.074462	0.139397	0.021371	0.060446	ANKRD45	2.11451	1.83632	1.83094	1.7971	2.33147	2.00916
ANKRD46	9.31293	8.26925	8.47338	8.03221	9.20673	8.46628	ANKRD46	9.0201	9.40014	9.17041	8.87002	9.72428	8.13451	ANKRD46	31.3345	31.729	30.3497	29.1927	31.0937	31.3296	ANKRD46	23.3068	22.6824	23.5128	19.8752	22.7398	20.9156
ANKRD49	5.77817	5.72094	6.37863	5.64365	7.44105	5.76506	ANKRD49	7.77105	7.37114	7.23933	7.76341	7.40618	7.84019	ANKRD49	6.05733	6.65136	6.60193	6.90825	6.15099	6.56958	ANKRD49	2.97789	3.35432	3.13973	3.22532	3.75565	3.34584
ANKRD50	14.7089	13.3147	12.8335	12.9342	11.302	11.7957	ANKRD50	13.1749	12.415	13.8161	12.9694	12.7918	11.1104	ANKRD50	2.75524	2.25771	2.55918	2.35721	2.31276	2.6557	ANKRD50	4.93964	4.62386	5.08788	4.61245	5.3631	5.47472
ANKRD52	41.9559	39.9386	39.917	43.213	40.5342	42.6004	ANKRD52	52.597	46.9659	51.8495	46.9319	48.0398	43.6095	ANKRD52	36.8492	34.6071	38.182	37.3868	36.768	36.8624	ANKRD52	42.3614	40.1676	41.2307	40.4894	43.7986	46.1674
ANKRD53	0	0.027906	0	0	0.033972	0	ANKRD53	0.055679	0.05458	0.065639	0.078789	0.030037	0.220862	ANKRD53	0.040237	0	0	0.043771	0	0.080208	ANKRD53	0	0	0	0	0	0
ANKRD54	22.0266	21.9325	24.2083	22.2709	19.8035	21.3437	ANKRD54	21.8904	21.847	23.2121	21.3073	19.6334	21.9818	ANKRD54	39.842	36.9058	36.3892	36.6201	38.7445	34.3402	ANKRD54	22.5947	21.4768	21.6087	20.1225	21.498	23.4955
ANKRD55	0.296065	0.073001	0.027022	0.145029	0.087825	0.113414	ANKRD55	0	0	0	0	0	0	ANKRD55	0.315711	0.088746	0.32956	0.345857	0.311536	0.284073	ANKRD55	0.084462	0.198239	0.115664	0	0	0.10856
ANKRD6	1.48181	1.35563	1.40909	1.17334	1.56498	1.29609	ANKRD6	3.13612	3.61565	3.18595	3.32845	3.41516	3.2395	ANKRD6	0.048944	0	0.034238	0.105495	0.040574	0.079659	ANKRD6	0.888677	0.920869	0.984407	0.619832	1.23898	0.797891
ANKRD60	0	0.016504	0.034787	0.018408	0	0	ANKRD60	0.015882	0.043781	0.057167	0.067702	0	0.035856	ANKRD60	0	0	0	0.073036	0	0	ANKRD60	0	0	0	0	0	0
ANKRD61	0.551424	0.444625	0.328328	0.440603	0.756773	0.689405	ANKRD61	0.368286	0.53478	0.299993	0.30855	0.235476	0.06906	ANKRD61	0	0.04954	0.213119	0.031986	0.023995	0.145802	ANKRD61	0	0.0392	0.034286	0.041679	0.134134	0.096486
ANKRD62	0.013617	0.021495	0	0.02416	0	0	ANKRD62	0.083793	0.081202	0.075547	0.14658	0.096856	0.050379
ANKRD62P1-PARP4P3	0	0	0	0	0	0	ANKRD62P1-PARP4P3	0.332226	0.38723	0.355057	0.487298	0.270023	0.309275
ANKRD63	0.137408	0.111821	0.181087	0.097206	0.048998	0.13055	ANKRD63	0	0	0	0	0	0	ANKRD63	0.037101	0.031548	0	0.040462	0.03042	0.07404	ANKRD63	0	0	0.142791	0	0.062038	0
ANKRD65	0	0	0.057015	0	0	0.043561	ANKRD65	0	0	0	0	0	0	ANKRD65	0	0	0	0	0	0	ANKRD65	0.039576	0.04636	0.040545	0.09866	0.158582	0.152034
ANKRD65-AS1	0	0	0	0	0	0	ANKRD65-AS1	0	0.042578	0	0	0	0
ANKRD66	0	0	0	0	0	0	ANKRD66	0	0	0	0	0	0	ANKRD66	0	0	0	0	0	0	ANKRD66	0.545142	0.252732	0.220119	0.135193	0.572508	0.409905
ANKRD7	0.549769	0.203305	0.180072	0.386521	0.390625	0.425437	ANKRD7	0.403688	0.195274	0.328716	0.507068	0.343935	0.378392	ANKRD7	0	0	0	0	0	0	ANKRD7	0	0	0	0	0	0
ANKRD9	13.2447	13.1307	12.8928	11.3298	10.7825	12.4916	ANKRD9	13.4459	13.2527	12.6411	12.7507	12.3856	11.6659								ANKRD9	73.591	64.6615	62.801	67.6752	66.4522	63.2852
ANKS1A	10.353	9.53181	10.0742	10.0669	9.60124	10.1916	ANKS1A	28.5239	27.5925	28.383	27.5318	28.5355	26.6462	ANKS1A	20.7778	20.3367	20.0575	19.0307	19.9605	20.2189	ANKS1A	20.9396	21.7396	22.7859	20.8052	24.1623	24.5585
ANKS1B	0.508892	0.546976	0.357595	0.671643	0.374781	0.46479	ANKS1B	0.067338	0.022483	0.037221	0.079817	0.037297	0.062194	ANKS1B	0.080412	0.019346	0.019022	0.02675	0.020039	0.048665	ANKS1B	0.334723	0.298775	0.32125	0.187463	0.363145	0.33562
ANKS3	22.0681	21.6069	22.7854	21.613	20.5281	21.2934	ANKS3	15.9853	16.3298	14.3928	16.1379	16.429	15.999	ANKS3	13.3447	13.572	13.6713	13.8854	14.2147	14.6766	ANKS3	14.117	11.9537	14.6235	10.9379	13.7553	14.0819
ANKS4B	0.883686	1.25347	1.04723	0.64991	0.798851	0.782755	ANKS4B	0.139013	0.063607	0.105712	0.07361	0.122119	0.032724	LOC102885000	13.2577	12.8862	12.3135	13.3754	12.4506	12.9234	ANKS4B	0	0	0	0	0	0
ANKS6	12.2721	12.9001	11.8497	11.1517	10.7873	11.0561	ANKS6	17.7103	16.8407	18.2835	18.0178	17.6175	16.025	ANKS6	3.18171	3.1729	2.67244	3.24618	2.82385	3.21534	ANKS6	20.8423	20.324	21.2729	18.6304	20.8813	21.317
ANKUB1	0	0	0	0	0.02708	0	ANKUB1	0	0.021815	0	0	0	0	ANKUB1	0	0	0	0	0	0	ANKUB1	0	0	0	0	0	0
ANKZF1	9.87394	8.92644	7.83181	8.10756	8.99028	8.99855	ANKZF1	14.8563	14.1312	15.3139	14.3672	15.2465	14.2328	ANKZF1	13.8542	13.2345	13.7646	13.1981	13.1667	13.4115	ANKZF1	9.29776	9.58303	10.0583	8.6732	10.2843	9.39767
ANLN	90.6715	85.5604	86.534	79.3207	79.8238	84.076	ANLN	52.9227	55.8318	54.4751	50.208	53.2798	49.5381	ANLN	142.471	127.634	140.995	140.805	139.941	139.163	ANLN	409.229	391.457	423.528	360.616	427.497	446.642
ANO1	0.43279	0.161608	0.285477	0.318245	0.204969	0.261943	ANO1	0.020101	0.041625	0	0.108574	0.045807	0	ANO1	0.038062	0.016168	0	0	0.015754	0.019112	ANO1	25.3285	24.3198	27.7026	20.6541	26.8823	29.0253
ANO10	25.8468	24.007	25.491	24.1979	23.1551	24.9342	ANO10	71.1261	70.3774	71.0211	71.7983	69.4395	71.0854	ANO10	35.6871	33.2765	32.8755	32.9436	33.3612	33.0926	ANO10	62.168	68.8543	60.4191	61.9032	62.8421	63.141
ANO2	0	0	0.014579	0	0.031565	0	ANO2	0.262896	0.433361	0.352633	0.460359	0.504964	0.345689	ANO2	0.286284	0.337743	0.367208	0.317633	0.474758	0.351782	ANO2	0.08044	0.12169	0.153998	0.129213	0.139155	0.100246
ANO3	0.012411	0.010499	0	0.037644	0	0	ANO3	0	0	0	0	0	0	ANO3	0	0	0	0	0.030425	0	ANO3	0.142347	0.033483	0.02933	0.124462	0.191389	0.096494
ANO3-AS1	0	0	0	0	0	0	ANO3-AS1	0	0	0	0	0	0
ANO4	0.121559	0.044918	0.0375	0.071591	0.036101	0.039325	ANO4	0.135235	0.058271	0.157707	0.084177	0.032064	0.167419	ANO4	9.59189	8.84649	7.82542	8.6926	8.58303	9.64765	ANO4	0	0	0	0	0	0
ANO5	5.48906	4.75243	5.0417	6.74364	7.70724	7.6683	ANO5	2.39233	1.9819	2.19673	2.54205	2.39965	2.41861	ANO5	7.99662	7.04677	7.35209	6.95643	7.47922	7.56377	ANO5	329.15	336.638	344.941	316.73	344.41	345.373
ANO6	64.3355	59.1849	60.475	68.9826	59.6253	66.0345	ANO6	41.9186	40.2981	41.3738	39.7957	39.438	38.4287	ANO6	68.7901	62.55	65.9056	64.3045	67.4606	68.211	ANO6	42.3767	44.6812	44.2044	40.2538	46.7296	47.4561
ANO7	1.3573	1.26817	1.00343	1.37752	0.823502	1.05294	ANO7	1.45408	1.56804	1.73339	1.55795	1.34986	1.47768								ANO7	0.207544	0.162842	0.183448	0.172887	0.21285	0.354624
ANO7L1	0.517943	0.429813	0.241289	1.29931	1.92703	1.50762	ANO7L1	0.777	0.546919	0.602829	1.04963	1.47189	1.0929
ANO7L1-2	0	0	0.083196	0.063287	0	0.061729	ANO7L1-2	0	0.034263	0	0	0	0.033189
ANO8	4.77122	5.46939	4.85101	3.85813	4.72218	4.60704	ANO8	11.8828	9.57404	10.8909	11.3044	10.7846	10.212	ANO8	5.30284	5.40417	5.73707	4.80404	5.14702	4.86548	ANO8	6.74252	6.03871	7.24321	5.60512	7.22144	6.81899
ANO9	0.11551	0.307618	0.323052	0.163199	0.452698	0.478395	ANO9	10.3747	8.50855	9.07587	9.37223	8.6081	8.66435	ANO9	0.219606	0.186616	0.153199	0.026886	0.060424	0.024457	ANO9	0	0.049096	0	0	0.028044	0.040379
ANOS1	0.030561	0.210006	0.07522	0.036052	0.072063	0.177591	ANOS1	0.591047	0.441061	0.723154	0.809437	0.578418	0.636835	ANOS1	56.8822	54.4361	53.8682	51.984	52.3785	54.0141	ANOS1	0.525135	0.359845	0.427576	0.300447	0.469767	0.612947
ANP32A	189.596	181.478	188.269	182.345	185.783	178.215	ANP32A	93.361	97.7879	98.3081	93.6884	96.9035	95.0307								ANP32A	202.83	198.34	215.897	192.236	225.817	211.578
ANP32A-IT1	0.06782	0.034508	0.083203	0.115155	0.169999	0.051852	ANP32A-IT1	0.082101	0.029304	0.097833	0.084748	0.016293	0.017252
ANP32AP1	0	0.055558	0.06139	0.065793	0.066545	0.197688	ANP32AP1	0.055222	0	0	0.076736	0	0.051524
ANP32B	412.78	425.381	408.751	397.809	391.472	371.084	ANP32B	225.635	239.985	239.465	228.031	233.482	223.134	ANP32B	366.217	350.77	369.534	380.757	378.154	374.515	ANP32B	312.925	308.734	321.421	289.811	319.679	315.338
ANP32D	0	0	0	0	0	0	ANP32D	0	0	0	0	0	0	ANP32A	260.734	241.901	249.773	259.371	250.175	241.979
ANP32E	80.3306	82.1523	79.18	79.0766	84.6177	80.7813	ANP32E	44.1512	44.8687	46.2576	44.2904	48.2179	42.9835	ANP32E	107.724	105.774	102.38	105.065	109.601	105.949	ANP32E	50.9841	53.6377	57.4862	48.3136	57.4639	52.9832
ANPEP	8.81952	9.09482	7.82769	8.21696	9.17522	9.79715	ANPEP	1591.94	1480.83	1544.59	1424.18	1451.2	1435.69	ANPEP	1.02564	1.17619	0.717285	0.833686	0.637422	0.927639	ANPEP	0.210756	0.214829	0.202659	0.351005	0.151136	0.163286
ANTKMT	78.5565	78.2577	79.2722	75.5213	77.0278	73.8724	ANTKMT	89.3819	86.1785	82.6862	83.3082	84.4126	87.4687	FAM173A	18.2015	18.5173	18.3034	16.9258	17.8846	18.4697	ANTKMT	0.494791	0.49439	0.215789	0.175769	0.093665	0.201627
ANTXR1	115.403	107.147	104.328	112.982	103.146	101.775	ANTXR1	10.9482	11.0636	10.7954	11.4556	10.856	11.0084	ANTXR1	29.8201	27.3342	25.6371	29.9647	28.4467	28.5671	ANTXR1	61.5575	66.8724	68.9093	63.0355	67.1672	69.0762
ANTXR2	0.886463	1.11499	0.979623	0.774356	1.02463	0.66148	ANTXR2	14.2236	15.0626	16.2194	14.0782	15.0847	17.8961	ANTXR2	11.999	11.7161	10.9622	11.096	10.7833	10.7165	ANTXR2	107.78	109.323	108.514	105.244	109.186	112.012
ANTXRL	0	0.146257	0.053897	0.025716	0	0	ANTXRL	0	0	0	0.050191	0	0
ANTXRLP1	0.077565	0.172076	0.189934	0.135873	0	0.066529	ANTXRLP1	0.113176	0.164016	0.131442	0	0.180582	0.096205
ANXA1	1899.18	1997.78	1935.14	1883.81	2120.13	2077.6	ANXA1	1062.21	1105.7	1128.94	1089.47	1116.53	1117.97	ANXA1	466.609	454.03	494.4	484.535	491.981	482.657	ANXA1	830.239	861.253	866.194	814.86	877.997	837.867
ANXA10	6.66448	6.36222	6.66656	5.9921	5.48342	7.43274	ANXA10	0	0	0	0	0	0	ANXA10	35.7645	30.7895	36.6086	36.4413	35.8187	35.9224	ANXA10	2.18487	2.09464	2.40191	2.23154	2.6079	2.30126
ANXA11	177.818	173.119	173.574	168.661	169.252	171.912	ANXA11	182.776	178.635	183.01	178.053	170.013	175.995	ANXA11	123.94	120.947	120.621	117.844	119.889	121.744	ANXA11	161.195	168.438	164.362	154.367	166.538	174.163
ANXA13	60.7416	54.9946	56.0606	43.6108	52.823	56.4974	ANXA13	3.11297	3.5842	3.07783	3.29316	3.30962	2.94301	ANXA13	0.4821	0.251044	0.087716	0	0.275849	0.293988	ANXA13	0.361385	0.308209	0.505613	0.409732	0.351666	0.727294
ANXA2	4108.45	3966.74	4086.97	3982.99	3880.05	4013.26	ANXA2	3255.97	3243.14	3204.2	3172.55	3181.84	3272.67	ANXA2	3692.22	3577.54	3831.16	3860.42	3808.66	3734.4	ANXA2	2677.12	2823.53	2663.56	2613.67	2665.56	2632.7
ANXA2P1	0	0.160773	0.223176	0.191083	0.144646	0.093273	ANXA2P1	0.180397	0.116094	0.09295	0.167537	0.170516	0.150233
ANXA2P2	0.174582	0.430761	0.224894	0.328294	0.155771	0.150072	ANXA2P2	0.346011	0.261036	0.195631	0.375329	0.256125	0.321347
ANXA2P3	0.266603	0.039416	0.130995	0.046844	0	0.045823	ANXA2P3	0.176015	0.075774	0.156813	0.163982	0.125145	0.110143
ANXA2R	2.52997	3.91376	2.92627	5.13186	4.18274	3.5564	ANXA2R	0.29962	0.267958	0.352706	0.386918	0.221187	0.237944								LOC129148746	0	0.102409	0.04477	0	0.116718	0
ANXA2R	2.52997	3.91376	2.92627	5.13186	4.18274	3.5564	ANXA2R	0.29962	0.267958	0.352706	0.386918	0.221187	0.237944								LOC129148765	0	0	0	0	0	0
ANXA2R	2.52997	3.91376	2.92627	5.13186	4.18274	3.5564	ANXA2R	0.29962	0.267958	0.352706	0.386918	0.221187	0.237944								LOC129148766	0	0	0	0	0	0
ANXA2R	2.52997	3.91376	2.92627	5.13186	4.18274	3.5564	ANXA2R	0.29962	0.267958	0.352706	0.386918	0.221187	0.237944								LOC129148767	0	0	0	0	0	0
ANXA2R	2.52997	3.91376	2.92627	5.13186	4.18274	3.5564	ANXA2R	0.29962	0.267958	0.352706	0.386918	0.221187	0.237944								LOC129148768	0	0.098278	0	0	0	0
ANXA2R	2.52997	3.91376	2.92627	5.13186	4.18274	3.5564	ANXA2R	0.29962	0.267958	0.352706	0.386918	0.221187	0.237944								LOC129148769	0	0	0	0	0	0.077549
ANXA2R	2.52997	3.91376	2.92627	5.13186	4.18274	3.5564	ANXA2R	0.29962	0.267958	0.352706	0.386918	0.221187	0.237944								LOC129148770	0	0.048505	0	0	0	0.039754
ANXA2R	2.52997	3.91376	2.92627	5.13186	4.18274	3.5564	ANXA2R	0.29962	0.267958	0.352706	0.386918	0.221187	0.237944								LOC129148771	0	0	0	0	0	0
ANXA2R	2.52997	3.91376	2.92627	5.13186	4.18274	3.5564	ANXA2R	0.29962	0.267958	0.352706	0.386918	0.221187	0.237944								LOC129148772	0	0	0	0	0	0
ANXA2R-AS1	1.07498	1.39911	1.52093	3.02829	2.97613	2.75392	ANXA2R-AS1	3.1572	2.50291	2.05833	3.05823	2.33089	2.67326
ANXA2R-OT1	5.64863	6.41113	5.8575	7.31769	7.9429	8.20658	ANXA2R-OT1	3.72336	3.69107	3.76124	2.88085	3.33186	3.43796
ANXA3	167.637	151.778	168.527	172.526	139.86	147.577	ANXA3	347.247	338.852	346.603	335.232	338.636	350.69	ANXA3	137.688	125.181	137.563	139.071	131.247	137.981	ANXA3	120.501	118.453	118.58	111.994	119.019	112.72
ANXA4	482.528	491.958	459.956	429.569	508.693	507.198	ANXA4	433.594	443.608	441.82	462.676	475.138	445.127	ANXA4	89.2338	87.1401	89.9641	87.7508	86.8638	88.7323	ANXA4	283.815	291.52	284.056	275.106	283.36	272.575
ANXA5	371.494	372.145	374.671	371.986	356.811	363.097	ANXA5	1046.3	1062.34	1078.42	1039.43	1075.07	1070.5	ANXA5	618.239	606.988	586.837	592.551	584.391	583.748	ANXA5	977.124	1025.57	982.972	950.798	1013.49	994.289
ANXA6	26.5418	26.2005	25.473	24.8212	26.6917	25.3204	ANXA6	5.03099	5.15829	4.60227	5.09659	5.74654	5.40771	ANXA6	955.521	938.742	953.661	953.132	937.101	936.469	ANXA6	651.358	677.783	654.225	633.338	656.367	661.904
ANXA7	109.374	107.684	108.257	110.741	108.231	105.628	ANXA7	164.02	163.589	164.167	159.258	161.474	164.402	ANXA7	88.1879	92.745	94.991	91.5608	94.0713	94.1255	ANXA7	73.708	70.9445	74.9088	64.7265	76.906	73.4763
ANXA8	37.2804	34.7969	40.4799	37.7231	36.6644	39.2859	ANXA8	0.048316	0.026857	0	0.146065	0	0
ANXA8-2	66.485	64.0609	65.781	65.7601	55.9563	58.0326	ANXA8-2	0.157282	0.179245	0.149569	0.174998	0.166934	0.121373
ANXA8L1	79.2383	82.0629	72.8394	79.0477	80.6882	73.5318	ANXA8L1	0	0	0	0	0	0	LOC102890336	0	0.106762	0	0	0	0
ANXA9	3.43048	3.34505	3.5535	3.32445	2.37043	2.46788	ANXA9	0.528417	0.444751	0.657021	0.790289	0.634675	0.869214	ANXA9	0.381333	0.32442	0.395894	0.257727	0.427533	0.094768	ANXA9	8.57506	6.95238	8.75587	8.50902	7.07011	7.52431
AOAH	0.073984	0.09593	0.167272	0.014641	0	0.029219	AOAH	0.388906	0.525138	0.269987	0.368588	0.454823	0.286106	AOAH	0.544603	0.462693	0.253646	0.334519	0.133495	0.445453	AOAH	0.03435	0.040381	0.035365	0.021448	0	0.033233
AOAH-IT1	0	0	0	0	0	0	AOAH-IT1	0	0	0	0	0	0
AOC1	0	0.01891	0.02102	0	0.045528	0.02205	AOC1	0.170369	0.018347	0.066201	0.052995	0.14134	0.08886	AOC1	0	0	0	0	0	0	LOC103301763	0	0	0	0	0	0
AOC2	0.820566	0.887704	1.06946	1.14143	0.907889	0.917427	AOC2	0.349917	0.166027	0.310589	0.213112	0.275028	0.276653	AOC2	0.607081	0.534655	0.528968	0.295422	0.553493	0.694152	AOC2	0.463784	0.280568	0.40537	0.231739	0.320775	0.349281
AOC3	0.051114	0.210793	0.206994	0.17583	0.320415	0.229111	AOC3	0	0.0362	0.073775	0	0	0.081983	LOC102897640	0.02952	0	0.046488	0	0.026287	0	LOC129147015	0.119644	0.237659	0.187034	0.12934	0.144863	0.197114
AOC3	0.051114	0.210793	0.206994	0.17583	0.320415	0.229111	AOC3	0	0.0362	0.073775	0	0	0.081983	LOC102898390	0	0	0	0	0	0	LOC129147015	0.119644	0.237659	0.187034	0.12934	0.144863	0.197114
AOC4P	0.03365	0	0	0	0.058573	0	AOC4P	0.066992	0	0.031461	0	0	0
AOPEP	119.408	119.261	126.079	137.468	125.998	133.743	AOPEP	34.08	32.1228	31.397	33.4847	31.5133	32.1014	CUNH9orf3	31.77	31.4009	34.5036	33.3343	32.576	36.038	LOC129151576	1.22778	1.30586	1.25843	1.13769	1.71775	0.93617
AOX1	1.56717	1.59632	1.59793	1.64005	1.28649	1.27473	AOX1	0.275596	0.178874	0.275619	0.220717	0.273148	0.2918	LOC102895358	0.285677	0.284412	0.196831	0.307555	0.254031	0.307685	AOX1	3.01617	2.76096	3.09002	2.89433	2.62703	2.92507
AOX3P-AOX2P	0.014188	0.018664	0	0.012545	0	0	AOX3P-AOX2P	0	0.051118	0.012298	0	0	0
AP1AR	9.52675	9.65193	8.827	9.19472	8.74147	8.57707	AP1AR	10.597	9.88284	10.7744	9.78785	11.0117	9.85414	AP1AR	28.0079	27.803	26.1343	27.3774	27.853	28.6757	AP1AR	19.9159	21.2583	23.8215	23.9628	23.1834	22.1794
AP1B1	43.9804	43.3259	43.2374	45.5468	43.4095	44.9557	AP1B1	92.025	87.4613	86.909	84.1615	84.5651	81.6978	AP1B1	106.92	96.7587	102.519	102.497	97.6491	98.1408	AP1B1	49.4159	48.9802	48.2363	44.8675	48.6075	49.6163
AP1B1P1	0	0	0	0	0	0	AP1B1P1	0	0	0	0	0	0
AP1G1	49.3092	46.0591	43.924	45.7495	42.8579	44.9521	AP1G1	48.0118	47.3531	49.3352	46.2045	45.82	44.3948	AP1G1	55.9451	51.4892	53.6974	55.7705	53.971	53.1388	AP1G1	60.3911	61.4879	64.0528	57.318	63.6836	64.1726
AP1G2	34.1639	36.4696	35.2383	34.7536	37.4652	37.558	AP1G2	52.0239	48.7124	50.0811	52.8564	46.4363	47.5477	AP1G2	32.2798	33.2843	31.8113	30.8581	31.2174	31.3857	AP1G2	31.5345	30.986	30.5177	29.1222	30.2654	31.9843
AP1G2-AS1	0.830654	0.474826	0.815473	1.02018	1.30612	0.893826	AP1G2-AS1	0.68413	0.518112	0.491158	0.568198	0.593188	0.606775
AP1M1	9.74605	9.50639	9.30527	9.05884	8.61318	9.23007	AP1M1	11.5581	10.9632	10.85	11.0009	10.9697	10.6962	AP1M1	82.1208	87.0588	82.8486	79.3245	79.0659	82.843	AP1M1	118.375	120.875	116.166	115.513	120.956	117.941
AP1M2	25.2911	25.5194	27.3851	25.6712	22.2325	23.6159	AP1M2	1.08972	1.53991	1.53701	1.75149	1.32432	1.51597	AP1M2	0.094294	0	0.048956	0.051004	0.076907	0.046876	AP1M2	0.650685	0.485823	0.668089	0.516555	0.792157	0.512969
AP1S1	150.182	144.114	149.216	148.609	141.544	148.998	AP1S1	238.87	237.398	236.707	232.333	234.796	235.23
AP1S2	26.412	23.8298	25.9608	25.2757	25.4861	24.556	AP1S2	35.995	34.7405	32.821	31.7387	33.9241	36.1938	AP1S2	70.8969	67.3207	68.016	66.5845	64.115	69.4128	AP1S2	13.9	14.4439	16.1245	13.4193	14.8109	14.4771
AP1S3	17.1606	17.2045	17.8187	15.6736	17.4642	17.396	AP1S3	42.6409	43.6892	47.7697	45.7684	43.5653	40.0492	AP1S3	6.25743	5.86233	7.13817	7.22691	6.01683	6.60218	AP1S3	30.6087	28.8608	30.0073	27.9311	30.4732	28.6502
AP2A1	103.028	99.4692	96.9452	95.6553	95.4669	98.6119	AP2A1	80.2615	79.3487	77.7619	75.1632	74.1216	74.7577	AP2A1	142.675	147.972	146.876	140.703	139.374	139.273	AP2A1	72.8643	72.1055	72.3134	66.7845	74.2037	74.8647
AP2A2	60.093	57.7664	55.2242	51.2242	53.0779	56.3029	AP2A2	80.07	73.3754	71.8711	74.108	70.0232	72.0487	AP2A2	395.023	388.78	376.19	349.216	356.789	359.544	AP2A2	121.997	121.738	116.141	110.961	123.567	120.742
AP2B1	185.358	183.049	169.104	192.309	177.995	182.005	AP2B1	141.31	140.368	144.597	135.826	142.577	131.879	AP2B1	101.992	98.9917	99.5822	97.2362	97.7182	96.4942	AP2B1	130.389	133.663	128.623	132.83	132.664	135.991
AP2M1	306.011	304.543	300.548	300.574	303.729	305.399	AP2M1	499.114	495.299	493.701	495.888	488.297	490.122	AP2M1	620.416	634.1	608.827	590.204	601.885	598.997	AP2M1	472.886	473.389	462.423	446.927	477.257	457.621
AP2S1	491.151	489.466	495.778	479.524	483.349	509.336	AP2S1	304.913	343.282	329.25	332.199	334.648	336.962	AP2S1	251.058	261.739	246.604	250.033	239.842	243.294	AP2S1	324.297	325.169	304.89	327.653	313.225	303.211
AP3B1	54.682	55.1392	53.216	58.2529	55.5	58.2442	AP3B1	43.4586	42.2342	44.62	44.4753	41.9632	42.8923	AP3B1	66.3523	62.6216	62.7613	62.8226	64.2418	61.4819	AP3B1	55.5113	57.9113	59.3016	55.4194	58.0389	57.3309
AP3B2	0.269895	0.429547	0.273646	0.349895	0.260799	0.63009	AP3B2	0.090764	0.125541	0.118354	0.090517	0.136514	0.024071	AP3B2	0.254463	0.313687	0.503804	0.460792	0.430578	0.217684	AP3B2	1.916	2.15918	1.76719	1.47286	2.16984	2.28582
AP3D1	80.1954	77.7289	76.1972	75.4781	71.5496	74.2476	AP3D1	123.156	118.852	121.026	115.472	117.692	113.173	AP3D1	116.225	111.015	115.56	108.413	113.066	112.679	AP3D1	81.7058	80.0297	88.8889	72.2227	88.4177	91.2181
AP3M1	63.2479	65.0125	65.6956	67.1795	63.0716	64.4561	AP3M1	49.6448	50.3334	50.9615	45.2533	46.5655	46.379	AP3M1	73.6279	72.1847	71.5531	75.5826	74.2431	70.9992	AP3M1	44.698	49.6843	50.1948	47.3864	50.93	50.816
AP3M2	10.5282	10.7758	10.6994	11.4166	12.346	11.0673	AP3M2	13.8528	13.9749	14.087	14.3373	14.2827	13.988	AP3M2	4.31811	4.00625	3.77914	4.06603	3.84633	4.74174	AP3M2	7.37193	7.78701	8.97645	7.62054	8.49683	8.55729
AP3S1	77.6752	72.5232	82.2805	82.6353	80.3111	81.21	AP3S1	78.1861	78.7512	76.882	77.1637	77.2996	81.1069	AP3S1	97.3447	101.768	98.4298	102.019	98.3899	99.7017	AP3S1	96.2061	96.0376	94.3557	88.7943	101.132	92.2905
AP3S2	23.0766	24.2527	25.9525	23.5282	22.7438	23.9006	AP3S2	19.2207	20.5847	20.4575	18.3504	20.6289	16.5412	AP3S2	48.3832	47.7611	45.8848	46.229	45.0468	46.5203	AP3S2	39.5289	41.5653	39.8519	38.7483	40.1259	38.072
AP4B1	8.99397	11.5157	7.56919	8.75762	9.78792	8.93576	AP4B1	13.2534	13.1748	13.4176	12.1802	13.5112	13.0637	AP4B1	8.66307	7.97591	8.52732	7.68506	7.8346	7.8706	AP4B1	7.69708	7.6454	8.20189	6.8586	7.08643	8.23074
AP4B1-AS1	0	0	0.033008	0.035292	0.035638	0	AP4B1-AS1	0	0.057168	0.069104	0	0.031531	0.027729
AP4E1	12.2972	12.0209	12.5112	12.4517	11.8708	12.0874	AP4E1	7.73688	7.54141	8.49982	7.39597	7.92751	7.24169	AP4E1	8.2328	7.40606	7.92597	7.69013	8.40554	8.16079	AP4E1	10.0188	10.0916	10.0239	9.1106	10.7941	10.7925
AP4M1	15.1688	17.4672	14.9679	15.1623	16.724	15.9753	AP4M1	23.0724	23.3676	25.254	24.7361	23.4023	22.3418	AP4M1	23.3968	22.0499	21.3153	21.3096	21.1764	21.1776	AP4M1	11.3054	11.4679	12.1085	9.8548	13.0995	12.5031
AP4S1	7.00489	6.62037	7.40617	6.71773	7.34795	6.81005	AP4S1	5.01663	5.90338	5.02432	5.02609	4.98711	5.08083	AP4S1	28.7871	28.2628	26.1064	24.6077	25.88	27.4801	AP4S1	13.4996	13.5068	12.2125	11.1831	11.6462	12.8325
AP5B1	12.9501	12.3522	12.8625	12.4879	12.0041	13.3303	AP5B1	16.7344	16.2631	16.4764	15.9362	15.4231	15.9114	AP5B1	8.30885	8.12509	8.13531	7.41526	7.84988	7.9566	AP5B1	279.831	277.756	261.828	276.641	257.406	259.37
AP5M1	8.62449	7.77261	8.03268	7.82331	7.33244	7.93968	AP5M1	11.6917	11.4728	12.0524	11.6039	10.8763	10.9522	AP5M1	14.9274	14.5553	14.5371	13.6824	14.3345	14.572	AP5M1	15.594	15.301	15.3045	14.7654	15.3019	15.6471
AP5S1	12.8927	12.4343	13.0354	12.708	12.1909	11.5148	AP5S1	10.6915	9.45961	10.1601	9.62867	9.87888	9.6616	AP5S1	10.306	9.43409	9.83563	8.97274	9.48062	10.1098	AP5S1	18.4519	18.6138	20.4985	18.9515	19.1271	18.2103
AP5Z1	7.64532	8.78721	8.17784	8.9928	8.72655	8.92711	AP5Z1	12.2475	11.8989	12.8532	12.6565	11.7436	12.2609	AP5Z1	13.119	13.9908	11.4945	11.3814	12.2646	12.682	AP5Z1	15.9411	15.0775	15.8849	15.4098	15.9267	16.4983
APAF1	7.72849	7.37654	6.77341	6.44963	6.64349	7.44264	APAF1	7.09657	7.86824	8.00549	6.76939	7.96163	6.68826	APAF1	14.0005	12.6955	12.2128	12.4355	14.1691	12.6438	APAF1	17.919	18.5629	17.8205	17.5154	19.3029	18.8353
APBA1	0.033885	0.266744	0.184046	0.189687	0.134006	0.218139	APBA1	0.043418	0.056263	0.042302	0	0.046434	0.054494	APBA1	2.98381	3.38055	3.25682	3.15772	3.14562	3.46709	APBA1	1.24788	1.12828	1.30453	1.01732	1.62929	1.40083
APBA2	3.58572	8.89987	8.78865	11.2339	9.35174	7.737	APBA2	0	0	0	0	0.020252	0	APBA2	17.8201	14.6788	16.1357	14.8779	15.5399	16.1657	APBA2	0.550436	0.670703	0.650201	0.509028	1.01255	0.571371
APBA2-2	14.0874	9.32391	8.48163	7.21681	8.11948	9.19132	APBA2-2	0.021696	0.032489	0.038851	0.030962	0.041364	0.044874
APBA3	5.6028	5.84834	6.31695	6.36906	5.39568	5.47404	APBA3	13.0312	12.3969	11.7444	13.1285	12.0295	11.4643	APBA3	72.004	70.4841	69.0378	66.1869	65.9361	65.8177	APBA3	35.8526	35.6849	35.0412	35.4518	32.7449	35.4233
APBB1	28.5381	26.0507	26.4881	27.6726	25.2431	26.6614	APBB1	3.11038	2.83679	3.15154	2.82535	2.58755	2.74968	APBB1	16.7848	17.1814	17.1369	16.128	16.8914	16.7764	APBB1	10.7273	10.9732	11.0604	9.45616	10.1306	10.339
APBB1IP	8.17733	8.97152	7.32662	7.37346	7.77602	6.55037	APBB1IP	17.16	16.631	16.2364	14.537	15.3762	14.4042	APBB1IP	6.22516	5.91091	6.21975	6.10972	6.09655	5.98139	APBB1IP	0	0	0.063885	0	0	0.020003
APBB2	5.87423	5.43025	5.21551	6.80148	6.02837	5.49433	APBB2	12.3915	12.1215	12.8773	12.7034	12.386	11.857	APBB2	15.702	16.0082	14.8343	14.9649	15.4989	14.2835	APBB2	92.9924	92.0873	98.9924	86.0162	102.234	108.523
APBB3	1.78495	1.83872	1.36472	1.71544	2.26827	2.07479	APBB3	3.32945	2.88177	2.91645	3.72575	3.44574	2.74797	APBB3	3.04382	2.50852	2.51015	2.48249	2.73929	2.74168	APBB3	1.76806	1.47406	1.84326	1.40696	1.4427	1.75524
APC	8.73437	7.24985	6.98789	8.2178	7.07701	7.5009	APC	9.12792	8.96688	9.86712	8.4713	9.43421	7.80033	APC	18.0292	15.1595	16.3241	16.5184	16.8506	17.8412
APC2	0.823801	0.723017	0.857543	0.831838	0.542124	0.714878	APC2	0.051908	0.050369	0.088139	0.026473	0.045348	0.04435	APC2	1.87007	2.00828	1.9478	1.60568	1.9071	2.04171	APC2	0.073715	0.047346	0.055323	0.033503	0.018056	0.04554
APCDD1	0	0	0.01702	0	0.030575	0	APCDD1	0.055794	0.013463	0	0.018217	0	0	APCDD1	0	0.035776	0.043753	0	0.034399	0	APCDD1	0	0	0.026521	0	0.017307	0
APCDD1L	0	0	0	0	0	0	APCDD1L	0.173931	0.096379	0.144918	0.156652	0.119321	0.128363	APCDD1L	0	0.035805	0	0.045727	0.034426	0.083862	APCDD1L	0	0	0	0	0	0
APCDD1L-DT	0.12952	0.023952	0	0	0	0.05582	APCDD1L-DT	0.023931	0.092736	0.08365	0	0.076551	0
APCS	0	0	0	0	0	0	APCS	0	0	0	0	0	0
APEH	66.4871	67.7078	64.6836	62.1974	64.0749	64.5799	APEH	183.585	183.31	182.512	178.132	177.212	177.778	APEH	69.6416	71.2019	70.7731	66.3118	70.2108	66.9147	APEH	50.4502	51.9716	47.8598	46.3132	50.2895	48.8169
APELA	0	0.0204	0	0	0	0	APELA	0	0	0.023789	0	0	0	APELA	0	0	0	0	0	0	APELA	0	1.1813	0	0	0	1.90049
APEX1	390.686	397.495	390.017	373.406	394.9	371.67	APEX1	238.597	245.099	236.247	239.382	242.785	241.326	APEX1	277.696	293.672	289.612	287.868	285.931	282.222	APEX1	248.518	241.128	241.596	232.342	246.801	236.248
APEX2	30.1875	29.7542	29.3727	28.1684	28.2153	28.0526	APEX2	17.5442	18.0647	16.5762	17.6652	17.5051	18.0487	APEX2	36.9726	37.1788	37.5988	35.9338	33.7895	34.9154	APEX2	15.8171	17.5269	16.3109	15.6369	15.4992	15.4916
APH1A	132.264	132.365	134.822	146.215	144.665	150.306	APH1A	169.08	167.951	161.43	177.001	168.974	167.044	APH1A	101.047	98.5713	104.499	99.9406	101.609	99.8052	APH1A	145.786	147.485	142.896	135.681	138.087	138.097
APH1B	15.3953	13.9288	18.1804	15.3611	15.6967	18.4078	APH1B	2.34641	1.74395	2.06443	1.96214	2.34482	2.14819	APH1B	19.8751	19.3643	19.3385	18.1829	18.0482	19.1309	APH1B	6.82902	6.72351	7.58908	6.7246	6.28451	7.05516
API5	88.0306	88.2717	88.5227	85.7732	87.6046	90.0423	API5	72.8561	72.9536	73.0035	73.9971	71.4128	70.857	API5	154.554	145.202	146.651	148.765	148.526	150.898	API5	99.82	105.018	104.774	103.376	107.018	102.821
APIP	46.4198	41.5335	47.0542	48.2307	45.4633	49.8498	APIP	44.6977	42.2923	43.1832	45.331	40.8067	43.9896	APIP	92.5411	88.4863	82.8246	87.564	84.1323	86.2917	APIP	26.0951	29.8832	28.1431	27.011	26.931	28.8468
APLF	1.08981	0.919608	1.09364	0.963225	1.19888	1.55845	APLF	2.28806	2.15743	1.91688	2.35544	2.61905	1.95913	APLF	12.6163	12.6359	11.6441	11.563	12.0511	12.6673	APLF	8.67489	9.48198	10.7895	8.4872	9.37005	9.72283
APLN	0.530051	0.497687	0.402623	0.234123	0.308771	0.175955	APLN	0.030239	0.014658	0.017632	0.063525	0.032263	0.014199	APLN	0.146533	0.04982	0.122463	0.128651	0	0.08797	APLN	0	0	0.522799	0	0.679125	0.974781
APLNR	0.017827	0.026377	0.014675	0	0	0.034621	APLNR	0	0	0	0	0	0	APLNR	0	0	0	0	0	0	APLNR	0	0	0	0	0	0.044042
APLP1	77.0459	77.3291	74.4852	76.0082	82.1868	85.4761	APLP1	0.231151	0.30544	0.501167	0.507065	0.224108	0.256429	APLP1	35.1862	35.7355	37.6116	34.4755	35.5907	35.5794	APLP1	41.2723	41.8602	46.3161	39.018	44.0731	43.1729
APLP2	178.949	176.633	173.332	166.639	174.287	175.538	APLP2	800.97	794.97	790.037	805.093	814.444	804.606	APLP2	294.013	275.199	264.278	261.81	271.465	276.075	APLP2	210.328	203.786	211.654	201.921	216.848	220.092
APMAP	186.632	182.301	183.082	172.459	173.88	177.568	APMAP	135.402	136.399	136.31	133.855	134.093	134.708	APMAP	1.66467	2.09719	2.17348	1.69584	2.12874	1.90329	APMAP	59.0997	58.3813	61.7647	54.401	58.731	57.8316
APOA1	0.086925	0	0.212572	0.076028	0.23095	0.148961	APOA1	0.28294	0	0	0	0.067245	0.052979	APOA1	0.31978	0.408195	0.276134	0.057376	0.519956	0.846009	APOA1	0	0	0	0	0	0
APOA1-AS	0	0	0	0	0	0	APOA1-AS	0	0	0	0	0	0
APOA2	0	0	0	0	0	0	APOA2	0	0	0	0	0	0	APOA2	0.827719	0.642748	0.323496	1.99891	0.244831	1.08096
APOA4	0	0	0	0	0	0	APOA4	0	0	0	0	0	0	APOA4	0	0	0	0	0	0	APOA4	0	0	0	0	0	0
APOA5	0	0	0	0	0	0	APOA5	0	0	0	0	0	0	APOA5	0	0	0	0	0	0	APOA5	0.338457	0.169687	0.296639	0.060225	0.064435	0.046304
APOB	0	0	0	0	0	0	APOB	0	0	0	0	0	0	APOB	0.003907	0	0	0	0	0	APOB	0	0	0	0	0	0
APOBEC1	0	0	0	0	0.161379	0	APOBEC1	0	0	0	0	0	0	APOBEC1	0	0	0	0	0	0.107827	APOBEC1	3.79877	5.12409	4.03006	4.82626	4.77815	4.76117
APOBEC2	0.042813	0	0.070236	0	0	0	APOBEC2	0	0	0	0	0	0.02959	APOBEC2	0.224479	0.305181	0.188044	0.322052	0.111291	0.15761	APOBEC2	0	0.100351	0	0	0	0
APOBEC3A	0	0	0	0.052276	0	0	APOBEC3A	0	0	0	0	0	0	LOC112484226	0.087359	0.219169	0.186518	0.93848	1.45417	1.34373	LOC103289074	0.120571	0.238062	0.312077	0	0.135564	0.340904
APOBEC3A	0	0	0	0.052276	0	0	APOBEC3A	0	0	0	0	0	0	LOC112484226	0.087359	0.219169	0.186518	0.93848	1.45417	1.34373	LOC129149857	0.16527	0	0	0.156299	0	0
APOBEC3A_B	0	0	0	0	0	0	APOBEC3A_B	0	0	0	0	0	0.007918
APOBEC3B	29.0233	30.8209	28.931	34.5889	36.8081	33.9652	APOBEC3B	16.2242	18.1107	17.7028	16.5788	18.0602	16.3539
APOBEC3B-AS1	0	0	0	0	0	0	APOBEC3B-AS1	0	0	0	0	0.1838	0
APOBEC3C	52.9428	49.4836	50.8501	55.0844	52.7387	54.7935	APOBEC3C	42.2791	44.707	42.5777	43.8305	43.6405	42.6511
APOBEC3D	0.454433	0.075322	0.181069	0.219111	0.159592	0.189329	APOBEC3D	0.138609	0.049026	0.099295	0.20626	0.104892	0.092038
APOBEC3F	8.09927	6.83143	7.48808	19.4734	18.3353	19.4374	APOBEC3F	10.4936	9.08977	9.77746	14.4297	13.5273	11.8697
APOBEC3G	0	0.022673	0.058524	0.232001	0.156344	0.285973	APOBEC3G	2.16198	2.11069	1.72846	2.94058	3.10767	2.7455								LOC103289073	97.7674	109.154	101.896	99.865	107.12	97.1039
APOBEC3H	0.419337	0	0.115705	0.12931	0.130829	0.731214	APOBEC3H	0.214779	0.156211	0.408689	0.525437	0.343965	0.605468	LOC107196052	2.42746	2.77709	1.97257	2.86619	3.1868	2.64668	AICDA	0.095122	0	0	0	0	0
APOBEC4	0	0	0	0	0	0	APOBEC4	0	0	0.020609	0	0	0	APOBEC4	0	0	0	0	0	0	APOBEC4	0	0	0	0	0	0
APOBR	0.257621	0.177879	0.169673	0.060718	0.198977	0.074143	APOBR	0.076496	0.024726	0.044614	0.107168	0.095236	0.07185	APOBR	0.064368	0.068345	0.135095	0.089258	0.040025	0.048532	APOBR	2.19239	2.16706	2.12467	1.712	2.21268	2.21041
APOC1	38.8922	43.8668	46.6407	38.408	38.2298	42.7597	APOC1	4.40315	4.86846	7.51631	7.17135	4.798	6.45874	APOC1	70.5612	73.2424	64.9497	62.4656	72.607	83.623	LOC129147718	0.322957	0.371708	0	1.79814	0	0
APOC1P1	0.143535	0.22713	0.116531	0.127099	0	0.121705	APOC1P1	0	0	0.193567	0	0	0
APOC2	0	0	0	0	0	0	APOC2	0	0	0	0	0	0
APOC3	0	0	0	0	0	0	APOC3	0	0	0	0	0	0	APOC3	0.422333	0	0	0	0	0	APOC3	0	0	0	0	0	0
APOC4	0	0	0	0	0	0	APOC4	0	0	0	0	0	0								APOC4	0	0	0	0	0	0
APOC4-APOC2	0	0	0	0	0	0	APOC4-APOC2	0	0	0	0	0	0	APOC2	1.26809	0.216053	0.498663	0.723491	0.569174	0.237551	APOC2	0	0	0	0	0	0
APOD	1.65032	1.35589	1.49372	1.28212	1.94791	2.11997	APOD	0	0	0	0	0.070814	0	APOD	1.42066	1.10794	1.04067	1.14169	1.02079	1.52371	APOD	0.060104	0	0.061301	0	0	0
APOE	6.03566	4.55567	5.27493	4.93942	5.57542	5.18897	APOE	5.69722	5.35996	4.72617	4.94958	5.04759	5.68504	APOE	17.5884	20.9704	17.7543	20.0857	17.4162	19.3336	APOE	2.63882	2.42594	2.26521	1.87839	2.38705	2.1218
APOF	0.039609	0.058595	0.032505	0.034889	0.070455	0.035546	APOF	0.058426	0.113154	0.068039	0.122501	0.155682	0.137025	APOF	0	0	0	0	0	0	APOF	0	0	0.197303	0	0	0.122979
APOH	31.9689	32.5634	32.9513	28.0565	32.5077	35.5611	APOH	0	0	0.053423	0	0	0	APOH	0.445096	0.242873	0.430761	0.45201	0.208815	0.28562	APOH	0	0	0	0	0	0
APOL1	13.3668	12.83	12.5327	80.1507	88.2263	85.2689	APOL1	154.753	151.177	154.022	196.262	186.656	194.589
APOL2	19.2968	17.7282	19.1265	97.8656	93.4293	94.1374	APOL2	76.4813	71.9138	72.3928	95.2651	92.6699	99.7367
APOL3	0.035439	0.02635	0.073819	2.82777	3.02277	3.47466	APOL3	0.536077	0.780576	0.581769	1.17085	1.01165	1.03992
APOL4	0.162567	0	0.188588	0.310227	0.380022	0.242419	APOL4	0.121309	0.12403	0.12881	0.179047	0.162927	0.271008	APOL3	0.548151	0.623614	1.00748	0.709109	0.963077	1.16321
APOL5	0	0	0	0	0	0	APOL5	0	0	0	0	0	0								APOL5	0	0	0.04521	0	0	0
APOL5-2	0	0	0	0	0	0	APOL5-2	0	0	0	0	0	0
APOL6	4.63931	4.53723	3.61741	44.5479	45.0373	43.3664	APOL6	15.8995	14.6905	15.2479	26.446	25.4692	24.5558	LOC102879246	6.06549	6.33862	5.52684	6.70742	8.12092	7.71466	APOL6	9.61862	9.23089	9.97274	10.458	12.1512	10.4418
APOLD1	0.615085	0.611127	0.402039	0.308952	0.536875	0.38961	APOLD1	1.08324	1.22756	1.32304	1.11929	1.23045	1.06444	APOLD1	3.4034	3.7171	3.3088	2.84574	3.5875	3.81413	APOLD1	0.735524	0.937662	0.951701	0.95727	0.898772	0.584994
APOM	3.70397	4.35362	2.79054	2.90314	4.78942	4.64224	APOM	2.5646	5.34041	3.84086	4.84122	5.38942	4.82128	APOM	3.39708	2.89385	2.35589	3.83297	3.80174	3.56417	APOM	0.159032	0.37024	0.242275	0.29637	0.105125	0.301557
APOO	49.425	49.411	46.0538	44.8286	47.722	45.6581	APOO	35.4075	34.5242	33.8486	35.3004	32.7142	34.1921	APOO	77.1592	68.7801	71.9141	78.6195	72.7071	74.9963	APOO	35.7922	36.04	35.8547	36.9835	33.8261	36.057
APOO	49.425	49.411	46.0538	44.8286	47.722	45.6581	APOO	35.4075	34.5242	33.8486	35.3004	32.7142	34.1921	LOC102894496	0.264655	0.22635	0.269019	0	0	0	APOO	35.7922	36.04	35.8547	36.9835	33.8261	36.057
APOOL	9.08634	9.49687	8.62262	8.9037	8.56173	9.24056	APOOL	9.78037	10.435	10.9432	9.48716	10.1128	9.58171	APOOL	60.8906	57.4724	61.0976	56.6316	61.248	62.1227	APOOL	13.8554	13.3785	12.9861	12.8645	14.8524	15.1931
APOOL	9.08634	9.49687	8.62262	8.9037	8.56173	9.24056	APOOL	9.78037	10.435	10.9432	9.48716	10.1128	9.58171	APOOL	60.8906	57.4724	61.0976	56.6316	61.248	62.1227	LOC129147680	11.4276	13.9726	15.0037	12.7651	14.5765	12.6128
APOOP5	0	0	0	0	0	0	APOOP5	0	0	0	0	0	0
APP	662.003	584.793	631.12	672.92	582.111	664.763	APP	1261.17	1222.69	1213.87	1225.7	1230.77	1242.24	APP	869.071	815.14	778.381	784.279	793.856	818.819	APP	549.646	560.878	587.029	512.796	594.65	607.086
APPAT	1.72002	0.908983	1.24541	1.2521	2.11255	1.3775	APPAT	2.77651	2.93489	4.14386	3.79054	2.71007	1.35448
APPBP2	15.3091	15.632	15.8308	15.5919	15.1158	15.0613	APPBP2	18.6594	18.8488	19.1999	18.6398	19.7906	18.4303	APPBP2	34.6607	32.4973	33.1096	32.8704	33.3011	34.6439	APPBP2	34.9727	34.8364	35.4421	29.8466	33.6003	34.9063
APPL1	18.8006	17.9597	17.4079	17.2321	16.5994	15.6783	APPL1	28.9365	27.8663	29.1287	28.2828	27.8141	26.347	APPL1	24.2836	23.8864	24.8734	23.6158	24.9357	23.6596	APPL1	15.9149	15.2961	17.2102	15.2106	16.8848	16.1138
APPL2	27.9319	25.4493	26.6296	20.7478	21.5719	20.9888	APPL2	38.0886	36.2694	35.1251	33.7933	34.1356	34.1925	APPL2	20.1225	19.6582	16.5833	17.9526	18.5014	18.6441	APPL2	12.7461	13.2379	14.3156	12.5197	14.1303	13.6344
APRG1	0.180628	0.04562	0.128448	0.043558	0.12438	0.053687	APRG1	0.083415	0.111089	0.531879	0.113534	0.216832	0.144377
APRT	372.094	402.42	367.379	363.034	364.085	358.614	APRT	242.474	248.906	242.403	244.692	232.622	238.572	APRT	68.8884	72.898	68.9451	68.7156	63.9956	63.2948	APRT	39.9549	34.9436	34.8	36.8125	36.8964	33.3561
APTR	3.65104	2.94755	3.55556	3.753	3.86428	3.85673	APTR	2.87681	3.25725	2.41933	2.9261	3.018	3.09634
APTX	41.9416	42.2386	42.6436	41.6335	43.8654	43.037	APTX	28.9617	28.7867	29.3076	28.4631	30.7611	29.7219	APTX	8.34601	10.5196	10.0095	9.32808	10.6637	10.3312	APTX	12.3091	12.111	13.8275	9.92286	12.6639	11.8033
AQP1	0.458257	0.517417	0.456242	0.489774	0.47258	0.541013	AQP1	0.607518	0.623489	0.54783	0.551872	0.552755	0.654285	AQP1	378.532	375.849	411.023	400.754	380.119	386.433
AQP10	0	0	0	0	0	0	AQP10	0	0	0	0	0	0	AQP10	0	0	0.077174	0	0	0	AQP10	0	0	0	0	0	0
AQP11	4.65821	4.08472	4.53309	3.67708	3.20518	3.78636	AQP11	1.80198	1.82571	1.87276	1.89917	1.47757	1.22247	AQP11	3.17897	3.69704	3.35006	3.44385	3.2254	3.79518	AQP11	3.6478	2.72534	3.98695	3.72252	2.69909	3.78162
AQP12A	0	0	0	0	0	0	AQP12A	0	0	0	0	0	0								LOC103283457	0	0	0	0	0	0
AQP12B	0	0	0	0	0	0	AQP12B	0	0	0	0	0	0
AQP2	0	0	0	0	0	0	AQP2	0	0	0	0	0	0	LOC102887095	0	0	0	0	0	0	AQP2	0.353422	0.329593	0.215789	1.40615	0	0.739299
AQP3	46.7654	41.8792	43.3455	36.6314	35.066	48.4036	AQP3	3.90461	3.91651	3.63813	5.26387	3.27024	5.28566	AQP3	3.66069	3.72333	3.41055	3.0764	2.33693	2.97243	AQP3	0.155754	0.182697	0.112875	0.155422	0.098119	0.035282
AQP4	0.024911	0.009367	0.030783	0.022397	0.011289	0.021875	AQP4	1.91752	1.69821	1.50278	1.79232	1.73131	1.60185	AQP4	0	0	0	0	0	0	AQP4	0	0	0	0	0	0
AQP4-AS1	0.056171	0	0.048831	0.040802	0	0	AQP4-AS1	0.028432	0	0	0	0.023498	0.039968
AQP5	0.049054	0	0	0.043148	0.043591	0	AQP5	0.144323	0.209513	0.377901	0.302315	0.153749	0.304475	LOC102886838	0.036095	0	0	0	0	0.036029	AQP5	0.402428	0.078231	0.273215	0.083414	0.177911	0.383065
AQP5-AS1	2.15642	1.68568	2.60619	2.98678	2.25853	2.96843	AQP5-AS1	3.91463	3.56722	5.18856	3.7214	4.30934	4.64311
AQP6	0.210842	0.038942	0.107299	0.050627	0.023432	0.184644	AQP6	0	0	0.04595	0.030086	0	0	AQP6	0	0	0	0	0	0	AQP6	0	0.078699	0.068711	0	0	0.064223
AQP7	0.71932	0.770059	1.06141	0.674773	0.622943	0.67298	AQP7	0	0.108964	0	0	0.027322	0	AQP7	0.144986	0	0	0.174188	0.112582	0.162599
AQP7B	0	0	0	0	0.076345	0	AQP7B	0	0.126424	0.39079	0.456897	0.302213	0.408561
AQP7P1	0	0	0	0.018273	0	0	AQP7P1	0.163098	0.120456	0.02252	0	0.025143	0.035302
AQP7P3	0	0	0.583211	0	0.622521	0.447514	AQP7P3	3.92366	3.53105	3.70159	4.54707	4.31882	4.82449
AQP8	0	0	0	0	0.068665	0	AQP8	0	0	0	0	0	0.037448	AQP8	0.15804	0.06733	0	0	0.06339	0.15538	AQP8	0	0.045874	0	0	0	0
AQP9	0	0	0	0	0	0	AQP9	0	0	0	0	0	0	AQP9	0.25082	0.65707	0.635041	0.400223	0.691405	0.649549	AQP9	0	0	0	0	0	0
AQR	26.6962	26.442	24.3617	28.0464	26.0488	25.8656	AQR	13.818	13.5956	13.8891	13.8383	13.8168	12.9026	AQR	45.4718	43.8106	44.6228	45.7542	45.9627	44.5208	AQR	28.6922	30.4665	30.5012	29.6313	31.4261	30.1485
AR	8.78613	8.70855	7.74578	8.56141	7.4735	7.20219	AR	0.246468	0.286161	0.226073	0.308427	0.183246	0.18613	AR	0	0	0	0	0	0	AR	0	0	0	0	0	0.02646
AR	8.78613	8.70855	7.74578	8.56141	7.4735	7.20219	AR	0.246468	0.286161	0.226073	0.308427	0.183246	0.18613	LOC102893723	0	0	0.046006	0	0.072324	0	AR	0	0	0	0	0	0.02646
ARAF	73.4716	75.5661	70.0674	69.1102	74.146	72.7017	ARAF	57.9981	58.2347	54.6834	55.7698	53.0486	53.9509	ARAF	31.0396	33.3229	32.8983	27.3265	30.5424	30.6745	ARAF	35.851	34.1219	35.0128	33.4389	33.9293	35.6828
ARAP1	23.0493	24.7363	23.6824	22.8181	24.6536	23.7141	ARAP1	37.8456	34.9264	35.2164	34.6086	35.0718	35.0636	ARAP1	17.9428	17.9513	16.7392	15.6967	17.3732	17.2724	ARAP1	12.8049	12.0182	13.6938	10.4444	13.8467	14.2039
ARAP1-AS2	0	0	0	0	0	0	ARAP1-AS2	0	0	0	0	0.029747	0
ARAP2	1.08724	1.07845	0.955463	1.45044	1.30469	1.41723	ARAP2	6.97371	7.26832	7.71782	7.74661	7.87765	7.35446	ARAP2	0.67492	0.375667	0.445451	0.539224	0.624601	0.584038	ARAP2	6.17546	5.21142	6.1704	5.62777	5.68063	6.88233
ARAP3	7.28228	7.30187	6.72617	7.77736	7.24754	8.1741	ARAP3	1.49259	1.37102	1.57191	1.33505	1.51081	1.58578	ARAP3	12.9098	12.9042	12.7081	12.0676	12.4275	12.9057	ARAP3	18.4292	20.2089	18.7333	17.1865	21.137	20.8353
ARC	0.067224	0.030403	0.239643	0.118735	0.146459	0.096679	ARC	0.083045	0.128803	0.096829	0.093025	0.017719	0.124766	ARC	0.11357	0.144793	0.08901	0	0.116935	0.056836	ARC	10.8709	11.6573	10.1937	8.66859	10.5089	10.7531
ARCN1	81.1861	75.2026	73.6238	74.7119	71.8485	74.7105	ARCN1	100.783	96.3055	94.4474	97.2394	94.943	92.0009	ARCN1	169.876	158.671	166.026	164.294	165.75	166.651	ARCN1	126.255	124.415	130.065	117.825	127.348	130.76
AREG	34.5026	32.9552	34.8858	43.4713	34.6971	35.0687	AREG	43.2838	43.2226	47.4517	44.1606	42.7995	48.3386	AREG	0	0	0	0	0	0	AREG	0.476602	0.433331	0.216375	0.395612	0.493415	0.557016
AREL1	29.9697	29.3731	26.7192	27.6223	27.7028	28.4254	AREL1	38.7107	37.7669	39.4455	36.7004	38.1996	35.4999	AREL1	23.4202	20.3874	22.1202	21.1062	21.6797	21.5207	AREL1	15.6059	16.0745	17.0127	14.0943	17.1483	17.5529
ARF1	444.265	432.856	432.186	430.033	425.727	429.758	ARF1	442.873	442.485	440.364	424.744	427.867	426.416								ARF1	479.682	482.567	470.261	461.69	464.478	457.141
ARF3	125.267	123.475	122.222	126.963	126.328	131.835	ARF3	172.669	175.286	173.18	166.937	176.202	162.875	ARF1	557.164	564.038	595.613	574.731	581.305	567.109	LOC103285254	324.399	337.585	323.197	324.957	331.773	324.553
ARF3	125.267	123.475	122.222	126.963	126.328	131.835	ARF3	172.669	175.286	173.18	166.937	176.202	162.875	ARF3	122.358	127.366	126.141	134.045	128.518	128.822	LOC103285254	324.399	337.585	323.197	324.957	331.773	324.553
ARF4	150.626	148.251	151.958	148.627	147.767	146.694	ARF4	251.28	263.09	252.017	251.438	249.551	245.964								ARF4	421.39	425.075	423.328	407.515	407.894	396.851
ARF4-AS1	1.20862	1.46089	1.52253	1.633	0.833752	2.01311	ARF4-AS1	0.851007	1.12117	1.97663	1.63263	0.81173	0.906129
ARF5	202.541	209.518	203.832	205	194.99	209.806	ARF5	210.874	214.393	208	205.818	200.396	206.839	ARF4	355.68	358.48	368.583	356.661	363.229	368.25	ARF5	104.831	107.016	107.295	105.418	101.122	96.6797
ARF5	202.541	209.518	203.832	205	194.99	209.806	ARF5	210.874	214.393	208	205.818	200.396	206.839	ARF5	75.956	83.459	76.7586	77.0398	73.9151	75.1013	ARF5	104.831	107.016	107.295	105.418	101.122	96.6797
ARF6	77.8964	81.0215	79.1767	87.6229	79.0434	76.3515	ARF6	171.236	162.285	178.087	169.857	175.76	165.502	ARF6	119.463	117.814	124.046	126.535	124.091	128.543	ARF6	224.482	219.864	224.689	203.837	223.242	207.168
ARFGAP1	41.3103	43.3878	42.4152	39.9949	43.7806	42.7767	ARFGAP1	53.7104	51.3449	50.4172	52.0586	49.2939	50.0851	ARFGAP1	75.7586	73.7418	76.0432	73.5145	74.8373	73.2509	ARFGAP1	41.174	45.3066	45.6125	41.1738	43.2098	45.74
ARFGAP2	21.6138	22.6439	20.0189	21.291	24.1232	23.8871	ARFGAP2	62.9328	64.6543	62.1651	65.2871	65.0273	60.9533	ARFGAP2	79.0184	82.0212	81.2671	78.0583	77.5892	81.1535	ARFGAP2	68.2738	69.673	69.5901	67.8571	67.8523	68.5806
ARFGAP3	21.2341	22.2198	21.4777	21.3635	22.1492	23.5067	ARFGAP3	82.3865	82.6393	85.6264	82.0468	81.5713	85.6103	ARFGAP3	39.8616	39.0522	38.2815	37.0812	39.1064	40.4222	ARFGAP3	62.6935	58.5285	65.5559	57.3787	62.5565	64.6636
ARFGEF1	22.0322	20.576	20.88	21.9708	21.1927	21.8754	ARFGEF1	65.1418	62.532	66.5292	61.6439	63.3205	60.2869	ARFGEF1	27.1979	25.3637	25.8759	27.2338	27.2583	26.9136	ARFGEF1	16.8942	16.1134	18.5412	14.2924	17.6014	19.0044
ARFGEF1-DT	0.087812	0.074103	0.036009	0.03865	0.156137	0.037797	ARFGEF1-DT	0.501789	0.586866	0.680742	0.273094	0.532058	0.754885
ARFGEF2	23.4414	22.6197	21.2706	22.6431	22.348	21.7156	ARFGEF2	34.8676	34.3418	36.6466	33.243	36.1453	31.0341	ARFGEF2	26.7977	22.4586	24.1755	24.3727	24.4792	25.1086	ARFGEF2	25.1197	21.6172	24.4117	21.1632	25.4877	26.3695
ARFGEF3	4.05344	3.38602	3.02588	3.98269	3.57396	3.65873	ARFGEF3	5.97795	5.19226	6.43104	5.679	6.39912	4.98034	ARFGEF3	0.2352	0.248108	0.195059	0.17523	0.178125	0.251584	ARFGEF3	0.300565	0.353903	0.360635	0.393125	0.499041	0.359615
ARFIP1	27.4848	24.1542	25.0414	25.0654	26.4803	25.9181	ARFIP1	35.8107	37.0423	35.175	37.2449	35.4764	36.4237	ARFIP1	42.0645	40.9026	39.2777	39.759	40.4456	41.9791	ARFIP1	45.2178	44.5239	47.4265	42.5422	46.5727	48.7839
ARFIP2	84.546	85.7476	87.996	83.9041	82.4121	84.6793	ARFIP2	57.2001	55.1066	54.5404	54.2675	52.745	57.4758	ARFIP2	32.8378	31.5871	34.5386	35.4657	31.9022	34.9038	ARFIP2	15.7462	15.1756	15.6366	14.1568	16.3394	17.719
ARFRP1	37.4303	36.5407	36.9153	37.9221	30.6656	32.3969	ARFRP1	54.9611	48.8546	51.418	51.9042	49.6995	47.6342	ARFRP1	63.7357	70.6003	73.0807	71.3026	69.9686	71.477	ARFRP1	55.0147	56.0657	61.2067	53.8157	55.2978	51.5993
ARG1	0	0	0	0	0	0	ARG1	0	0	0	0	0	0	ARG1	0	0	0	0	0	0	ARG1	1.24495	1.62454	1.81174	1.96824	1.40401	1.46759
ARG2	4.20152	2.76409	4.3638	4.87399	2.65176	4.33178	ARG2	8.59894	7.16477	6.58578	7.22944	6.47265	7.96084	ARG2	33.1219	34.5963	34.2374	36.3185	32.8377	32.0219	ARG2	97.8633	105.161	104.142	97.0104	101.56	101.515
ARGFX	0.039655	0.042998	0.050313	0	0.073926	0.035751	ARGFX	0.069531	0.061109	0.135785	0.035335	0.134668	0.020373	ARGFX	0	0	0	0	0	0
ARGFXP2	0	0	0	0	0	0.052404	ARGFXP2	0	0.086469	0	0	0	0.04189
ARGLU1	15.0692	16.163	16.0767	16.5001	17.8255	16.4569	ARGLU1	23.6916	22.8826	21.7247	24.4055	23.8889	23.2314	ARGLU1	66.8583	68.1083	65.7146	66.9521	67.1305	69.6538	ARGLU1	51.0793	50.0778	53.8694	45.1159	54.0336	53.5305
ARHGAP1	51.408	49.1693	45.3363	47.09	50.1371	48.1097	ARHGAP1	80.0117	78.5694	80.8775	75.5684	77.3268	72.3333	ARHGAP1	89.7628	86.158	86.7517	85.3749	79.9209	84.1449	ARHGAP1	104.932	106.393	103.631	95.6405	104.179	104.545
ARHGAP10	8.60445	8.16814	7.83672	7.6731	7.45196	7.41728	ARHGAP10	12.3675	12.7583	14.192	12.2437	13.2584	11.8697	ARHGAP10	9.45961	9.09354	9.5984	10.5549	9.67762	8.8838	ARHGAP10	12.4547	13.5031	14.2923	13.419	12.3047	14.1938
ARHGAP11A	58.5825	60.0077	60.0227	53.5748	59.2259	53.7495	ARHGAP11A	16.618	15.6578	17.7691	16.9679	19.0044	15.8149	ARHGAP11A	69.8494	65.9532	69.461	68.7579	70.9274	69.1716	ARHGAP11A	44.2977	42.2777	48.5348	38.8343	47.3537	46.0225
ARHGAP11A-DT	0.200198	0	0	0.633177	0	0.150372	ARHGAP11A-DT	0	0.289886	0.547131	0	0	0.123583
ARHGAP11A-SCG5	2.9317	3.20494	1.8822	3.24395	4.06305	2.62027	ARHGAP11A-SCG5	0.296068	0.135001	0.0439	0.312157	0.142198	0.327326
ARHGAP11B	6.46041	6.73415	5.81859	8.28374	8.41054	7.62085	ARHGAP11B	2.2182	2.78837	3.52732	2.28201	3.37081	2.19417
ARHGAP11B-DT	1.38375	1.01749	0.772648	0.983167	0.783422	1.09674	ARHGAP11B-DT	1.46558	1.03258	1.43091	1.16256	1.24977	1.1867
ARHGAP12	30.514	30.0601	29.5269	31.8787	30.0681	31.7584	ARHGAP12	23.8644	23.7617	24.7302	24.1164	23.3155	22.9146	ARHGAP12	16.5142	15.3963	16.0765	14.4564	16.1631	17.3267	ARHGAP12	18.2712	17.8567	18.5457	15.1956	17.7746	17.2287
ARHGAP15	0.008849	0.013094	0.013729	0.063239	0.007919	0	ARHGAP15	0.052714	0	0.050711	0	0	0.012376	ARHGAP15	0	0	0	0	0	0	ARHGAP15	0	0	0	0	0	0
ARHGAP15-AS1	0	0.014889	0.007689	0.002723	0	0.005799	ARHGAP15-AS1	0.005038	0.002253	0.002682	0.007059	0.005333	0
ARHGAP17	27.4855	24.4	26.5608	31.298	26.3663	31.4323	ARHGAP17	37.784	37.1858	40.119	36.025	37.0645	37.5389	ARHGAP17	23.201	22.1487	22.0633	22.1365	22.2192	21.5202	ARHGAP17	45.9833	42.7064	46.1754	37.8306	49.573	53.8493
ARHGAP17-2	0	0	0.07518	0	0	0	ARHGAP17-2	0	0	0	0	0	0
ARHGAP18	53.4567	45.9411	52.0103	53.1505	45.3594	56.0077	ARHGAP18	50.8349	50.7513	51.5268	50.4321	50.0755	50.839	ARHGAP18	5.67922	5.34445	5.37612	5.43014	5.06311	6.18851	ARHGAP18	104.808	95.6644	106.408	91.8963	103.58	110.284
ARHGAP19	5.29437	5.80297	5.41685	5.18369	5.38511	5.16402	ARHGAP19	4.45353	4.35398	4.04088	4.28875	4.13364	4.23369	ARHGAP19	14.7601	14.3718	16.5517	13.8645	14.8598	13.5538	ARHGAP19	20.9138	21.7952	22.5682	20.0759	23.1674	24.8837
ARHGAP19-SLIT1	0	0	0	0	0.120801	0.222461	ARHGAP19-SLIT1	0	0	0	0	0.064203	0
ARHGAP20	0.101606	0.131497	0.07324	0.09603	0.106473	0.131301	ARHGAP20	0	0	0	0.021804	0	0	ARHGAP20	0.077888	0.105997	0.049106	0.017311	0	0	ARHGAP20	0.025354	0.029826	0	0.031673	0	0.036848
ARHGAP20	0.101606	0.131497	0.07324	0.09603	0.106473	0.131301	ARHGAP20	0	0	0	0.021804	0	0	LOC102895624	0	0	0	0	0	0	ARHGAP20	0.025354	0.029826	0	0.031673	0	0.036848
ARHGAP21	36.8293	35.7257	34.5349	47.2854	44.8528	42.1074	ARHGAP21	33.5878	32.3683	34.9981	32.0685	32.8472	30.2724	ARHGAP21	21.9845	19.8657	21.2407	21.2458	21.6603	21.225	ARHGAP21	25.4244	21.1962	26.8943	19.7556	27.3087	30.2824
ARHGAP22	0.996029	1.11006	0.937356	0.867474	1.03031	0.84836	ARHGAP22	16.7864	15.3423	15.401	14.0636	14.1603	14.1616	ARHGAP22	1.14186	1.3904	0.751852	0.727789	1.06278	1.00232	ARHGAP22	0	0	0	0	0.03054	0
ARHGAP22-IT1	0	0	0	0.056821	0	0	ARHGAP22-IT1	0	0	0	0	0	0
ARHGAP23	46.7475	48.0055	47.5175	44.4094	39.2553	41.3834	ARHGAP23	36.8661	34.4135	38.362	32.9892	34.321	32.4059	ARHGAP23	62.6955	57.8571	64.0246	63.7919	61.3049	63.5519	ARHGAP23	34.8008	31.2052	35.7599	29.6619	36.4013	39.2573
ARHGAP23-2	12.5444	10.9767	12.1404	15.7556	8.66671	9.12396	ARHGAP23-2	8.17917	8.09246	6.24517	8.66585	6.87965	8.48214
ARHGAP24	4.48496	4.65689	4.31923	4.81017	4.29468	4.77894	ARHGAP24	22.7473	23.0021	22.4619	22.6647	22.5295	23.0096								ARHGAP24	25.3152	26.0368	27.9763	24.2095	26.5942	27.2261
ARHGAP25	0.221462	0.258861	0.164438	0.340316	0.378413	0.237183	ARHGAP25	0	0	0	0	0	0	ARHGAP25	0.072078	0.06122	0.030273	0.080069	0	0	ARHGAP25	0.014037	0	0.014462	0	0.018874	0.040783
ARHGAP26	19.1074	16.3695	15.8136	18.684	17.2154	19.4689	ARHGAP26	23.2166	22.9131	23.8676	27.2941	27.6792	24.3387	ARHGAP26	0.95016	0.822204	0.872235	0.776623	0.857982	0.866452	ARHGAP26	8.1551	8.34001	8.71905	8.07018	9.24986	9.11104
ARHGAP26-AS1	0	0	0	0.06853	0	0	ARHGAP26-AS1	0	0	0	0.158955	0	0
ARHGAP26-IT1	0	0	0	0	0	0	ARHGAP26-IT1	0	0	0	0	0	0
ARHGAP27	7.12414	8.49641	7.47108	7.98004	8.51545	6.50608	ARHGAP27	26.7468	29.5829	24.6042	27.3667	22.1455	22.5118	ARHGAP27	5.89088	6.01054	6.60042	5.78827	6.13373	5.73229	ARHGAP27	42.8764	39.3238	43.2012	36.5948	43.239	42.8998
ARHGAP27-2	0.057075	0	0	0.041739	0	0	ARHGAP27-2	15.6146	15.6282	16.3556	14.5826	18.6654	15.6263
ARHGAP27-3	0.465547	0	0.438702	0	0	0.87367	ARHGAP27-3	2.67588	0	4.22929	0	0	1.50766
ARHGAP27P1	0.360586	0.548245	0.396684	0.246105	0.535775	0.487865	ARHGAP27P1	4.61309	3.03507	3.44944	3.79086	4.0431	4.3258
ARHGAP27P1-BPTFP1-KPNA2P3	0.723754	0.874578	0.815482	0.636434	0.989701	0.994868	ARHGAP27P1-BPTFP1-KPNA2P3	4.34729	3.5252	4.25682	4.8572	3.50584	4.3984
ARHGAP27P2	0	0	0.209413	0	0	0	ARHGAP27P2	0	0	0.036506	0	0.033414	0
ARHGAP28	0.746097	0.713715	0.74786	0.485141	0.369954	0.415058	ARHGAP28	0.064992	0.008434	0.028821	0.030313	0.009281	0.020335	ARHGAP28	4.4184	4.9085	3.87517	4.12359	4.40623	4.2844	ARHGAP28	6.94981	7.36551	7.68295	6.44255	7.98744	7.69545
ARHGAP28-AS1	0	0	0	0	0.26285	0.507587	ARHGAP28-AS1	0	0	0	0	0	0
ARHGAP29	18.2815	16.2387	17.3887	18.1717	15.5799	16.5575	ARHGAP29	75.3727	71.7926	78.3165	72.1991	71.9976	72.4403	ARHGAP29	132.341	132.51	131.469	132.675	133.672	135.784	ARHGAP29	46.6247	46.3146	50.4902	42.3689	48.9992	51.9851
ARHGAP29-AS1	0.126742	0	0.253677	0.136049	0.13832	0.668332	ARHGAP29-AS1	0.185282	0.647248	0.21467	0.98615	1.06949	0.41832
ARHGAP30	0.017579	0	0	0	0.015666	0.029502	ARHGAP30	0.039145	0	0	0	0.027848	0.011913	ARHGAP30	0	0	0	0	0.01038	0.012578	ARHGAP30	1.08742	0.76509	1.03014	1.21855	1.07118	1.09758
ARHGAP31	0.924488	0.961648	0.856445	0.815204	0.70282	0.92722	ARHGAP31	2.74997	2.59966	2.72031	2.6651	2.63888	2.4324	ARHGAP31	0.158349	0.177648	0.178676	0.22147	0.165023	0.125545	ARHGAP31	13.3682	12.6129	13.5161	11.8966	13.2673	14.8439
ARHGAP31-AS1	0.141468	0.209139	0.228829	0.245463	0.124679	0.36151	ARHGAP31-AS1	0.101372	0.292734	0.58609	0	0	0
ARHGAP32	5.02991	4.26403	4.49549	5.16408	4.72539	4.59244	ARHGAP32	3.4118	3.12621	3.31488	3.16512	3.00808	2.57602	ARHGAP32	3.66507	3.08691	3.2342	3.18247	3.06379	3.70976	ARHGAP32	17.8848	16.2028	18.224	15.4936	19.0661	21.3755
ARHGAP33	3.39754	3.426	2.93812	2.69684	3.66834	3.18936	ARHGAP33	2.18914	1.53201	1.57265	1.29849	1.13655	1.18595	ARHGAP33	1.39264	1.41921	1.68155	1.4403	1.48598	1.31531	ARHGAP33	3.40794	3.49653	3.99484	3.29093	3.74959	4.15742
ARHGAP35	80.832	71.664	73.1306	78.9723	67.5217	70.9738	ARHGAP35	40.3847	38.4507	40.9141	38.1053	40.2579	36.2314	ARHGAP35	61.2136	56.2783	59.5467	60.9333	58.0638	60.1155	ARHGAP35	56.8419	53.6883	56.7789	52.7267	58.3553	64.184
ARHGAP36	0	0	0	0	0	0	ARHGAP36	0	0	0	0	0	0	ARHGAP36	0	0	0	0	0	0	ARHGAP36	0	0	0	0	0	0
ARHGAP39	10.5112	10.8375	10.1047	10.2218	9.44422	9.68088	ARHGAP39	8.42601	7.85058	8.03564	8.02805	7.67116	7.2775	ARHGAP39	9.01987	10.4673	9.82398	8.87185	9.74111	10.0307	ARHGAP39	13.8892	12.6091	15.9084	11.5734	14.6147	15.3499
ARHGAP4	0.868049	0.716829	0.747556	0.802523	0.863313	1.01058	ARHGAP4	1.30261	1.37902	1.51907	1.48883	1.2141	1.19517	ARHGAP4	0.021331	0	0.022345	0.023562	0.017636	0.021404
ARHGAP40	0	0.032951	0.036643	0	0	0	ARHGAP40	3.61527	3.48858	3.46472	3.99894	2.98011	3.02363	ARHGAP40	0.474556	0.403209	0.338906	0.571733	0.69545	0.32464	ARHGAP40	0	0	0.026019	0	0	0
ARHGAP42	4.51765	4.36127	4.42603	4.46585	3.81551	3.79441	ARHGAP42	5.01851	4.77539	5.13732	4.75518	4.86586	4.32219	ARHGAP42	18.5975	16.3157	17.379	17.3366	17.245	18.3372	ARHGAP42	37.6215	35.0185	42.6677	32.4073	40.7293	43.8204
ARHGAP42-AS1	0.036895	0.054581	0.121156	0.16256	0.131287	0.127144	ARHGAP42-AS1	0.027232	0.1055	0.095158	0.114227	0.232238	0.127754
ARHGAP44	4.14309	4.29682	4.76499	4.18539	4.23801	4.68451	ARHGAP44	0.113734	0.162294	0.189053	0.12293	0.09906	0.093682	ARHGAP44	2.25161	2.2695	2.51317	2.80338	2.98813	1.85734	ARHGAP44	10.1342	8.6692	10.1011	8.96326	10.6503	11.3104
ARHGAP44-AS1	0.052769	0.036851	0	0.062129	0.015824	0.050524	ARHGAP44-AS1	0.015711	0.025355	0.018572	0.074266	0.028829	0
ARHGAP45	0.842341	1.06273	0.699774	0.971376	0.47456	0.926495	ARHGAP45	1.14703	1.07446	1.15954	1.01134	1.26586	1.13066	ARHGAP45	0.551767	0.846206	0.595257	0.612477	0.762752	0.662732	ARHGAP45	0.046253	0.054421	0.107278	0.028893	0.015558	0.022415
ARHGAP5	34.26	28.8955	30.8346	31.6169	28.0358	30.6499	ARHGAP5	23.9893	23.0821	26.3897	23.9029	23.4585	22.4479	ARHGAP5	72.9731	63.5884	70.0253	69.8854	69.1955	74.5452	ARHGAP5	28.7186	27.461	30.6088	26.1044	28.5439	30.602
ARHGAP5-AS1	12.8447	12.2201	14.9626	9.84377	10.8035	11.7233	ARHGAP5-AS1	6.27105	5.62443	5.41015	6.66453	4.68785	4.82663
ARHGAP6	0	0.012247	0	0.014633	0	0	ARHGAP6	6.61413	6.47028	6.13245	5.63893	6.31574	5.69815	ARHGAP6	26.0731	24.2782	27.9097	27.0895	26.0857	26.5036	ARHGAP6	0	0	0	0	0	0
ARHGAP8	1.20539	2.27077	1.98102	0	1.33737	0.251584	ARHGAP8	12.94	13.217	14.2403	13.6661	12.381	12.267	ARHGAP8	3.43954	3.55934	2.98977	3.32801	3.86872	3.56664
ARHGAP9	0	0.056992	0.063633	0.034151	0.068961	0.100173	ARHGAP9	0.113688	0	0.033305	0.15991	0.042016	0	ARHGAP9	2.28779	2.83246	1.82228	2.23378	2.68031	2.24991	ARHGAP9	10.0685	9.68574	9.4174	8.88136	8.78866	8.69249
ARHGDIA	484.127	481.337	476.042	458.216	446.669	458.07	ARHGDIA	618.843	632.028	654.366	598.863	593.282	612.011	ARHGDIA	571.037	622.706	665.024	635.228	620.727	602.697
ARHGDIB	3.59402	2.18298	2.35978	2.42236	2.39355	2.7479	ARHGDIB	43.4874	49.3305	47.6071	47.1294	44.2173	44.0372	ARHGDIB	73.2902	68.4717	69.65	67.8055	67.7555	74.9615	ARHGDIB	191.833	200.897	192.388	179.249	189.4	185.738
ARHGDIG	1.11524	1.41377	0.780025	1.04624	1.41188	1.3662	ARHGDIG	0	0	0	0	0	0	ARHGDIG	0	0.140008	0	0	0.131583	0	ARHGDIG	3.96204	3.99168	2.94389	2.64955	3.51208	2.8282
ARHGEF1	78.8359	75.1752	75.5931	77.3442	72.0627	77.1237	ARHGEF1	58.4191	52.5173	55.75	52.9559	52.108	52.5706	ARHGEF1	36.1519	34.9308	35.1244	33.8738	34.7613	36.0782	ARHGEF1	57.8977	55.9236	59.4357	49.5209	59.8707	64.1078
ARHGEF10	22.9423	19.6	20.6147	20.8776	20.1995	20.7062	ARHGEF10	12.6342	12.4823	12.6238	11.5352	11.4904	11.5519	ARHGEF10	5.4874	5.30494	5.57126	4.47615	4.89471	5.06425	ARHGEF10	34.9531	28.9735	34.6655	26.2644	34.7972	36.9981
ARHGEF10-2	0.019573	0.014296	0.087205	0.062688	0.241285	0	ARHGEF10-2	0.094472	0.037866	0.092173	0.075045	0.040944	0.076283
ARHGEF10L	10.6003	10.0171	9.18801	7.47608	8.97655	8.81986	ARHGEF10L	27.397	26.1533	26.2959	27.1308	28.2899	25.9215	ARHGEF10L	29.8891	31.1231	31.5133	29.7337	32.5066	31.0974	ARHGEF10L	13.1755	12.8544	12.9294	10.5731	14.15	14.3828
ARHGEF11	18.2297	17.7093	17.8294	18.9181	18.2435	18.5714	ARHGEF11	15.8019	14.9634	15.2868	14.5759	14.8546	13.4199	ARHGEF11	8.89593	8.90933	8.7519	7.41327	8.54817	8.44778	ARHGEF11	8.15926	7.34149	9.15632	5.86714	9.49441	10.0512
ARHGEF12	31.0564	28.5521	27.21	31.8431	29.5141	30.6313	ARHGEF12	63.5632	61.4061	64.3386	61.9395	63.6182	56.91	ARHGEF12	23.8927	20.3458	21.0796	20.7836	21.6114	21.9541	ARHGEF12	55.7825	52.6918	56.9007	50.4642	59.9588	63.469
ARHGEF15	0	0	0	0	0	0	ARHGEF15	0	0	0.013587	0	0	0	ARHGEF15	0	0	0	0	0	0	ARHGEF15	0.011614	0	0.04789	0.014511	0.015627	0.067543
ARHGEF16	6.36814	6.29754	7.33799	6.37304	6.59641	7.01831	ARHGEF16	42.0781	40.3509	38.1213	40.8403	37.97	38.2453	ARHGEF16	11.1261	11.2572	10.4437	10.0701	9.89781	11.2012	ARHGEF16	32.4857	28.9838	30.3507	28.7335	34.8053	32.2716
ARHGEF17	6.43997	6.62207	6.68682	5.87699	6.83793	6.13769	ARHGEF17	17.0937	15.5643	15.465	15.6824	16.2876	15.0652	ARHGEF17	21.2344	19.0031	20.3322	19.6582	20.21	20.476	ARHGEF17	30.9398	26.7826	31.4347	25.3873	33.0436	35.064
ARHGEF17-AS1	0.502479	0.668961	0.869836	0.662856	0.714352	0.518723	ARHGEF17-AS1	2.29068	2.65616	2.62494	1.75401	2.40078	1.76664
ARHGEF18	39.9051	40.2813	36.7308	39.3489	36.8985	37.5885	ARHGEF18	29.5508	29.2989	29.0222	29.4591	28.7698	28.2045	ARHGEF18	23.5606	21.5417	21.5606	22.1031	22.024	22.2407
ARHGEF19	3.74855	4.22231	3.19012	3.69285	4.29268	3.53351	ARHGEF19	2.49044	2.35775	2.56269	2.79048	2.37589	2.69655	ARHGEF19	2.65223	2.75343	2.55586	2.42719	3.20295	2.38613	ARHGEF19	0.357228	0.439956	0.753116	0.637291	0.731359	0.444374
ARHGEF19-2	0.128063	0	0.056669	0.047795	0.144303	0.128293	ARHGEF19-2	0	0	0	0	0	0
ARHGEF2	13.3486	14.249	12.4364	13.1417	13.4305	13.8265	ARHGEF2	41.295	38.7616	41.848	38.8212	40.7212	36.7103	ARHGEF2	24.6068	24.6106	26.3086	24.7009	24.7901	24.7136	ARHGEF2	98.4791	94.4666	101.009	85.9867	100.426	104.04
ARHGEF2-AS1	0	0	0	0	0	0	ARHGEF2-AS1	0	0	0	0	0	0
ARHGEF2-AS2	0.186572	0.069006	0.255491	0.283001	0.233101	0.24126	ARHGEF2-AS2	0.15066	0.111372	0.10038	0.128653	0.160745	0.08631
ARHGEF25	6.86035	6.9239	6.28018	6.24947	7.00327	6.87148	ARHGEF25	0.174297	0.14619	0.025118	0.090475	0.150256	0.020231	ARHGEF25	8.34811	8.44612	7.52056	7.56247	8.93477	8.69217
ARHGEF26	3.24697	3.47772	3.41989	2.96153	3.44898	3.26597	ARHGEF26	1.84583	1.74761	1.8399	1.90539	1.81817	1.65366	ARHGEF26	4.8052	4.70252	4.50562	5.40619	4.10053	4.68866	ARHGEF26	0.391105	0.284974	0.374554	0.337449	0.325945	0.460652
ARHGEF26-AS1	0.179754	0.095256	0.055247	0.027034	0.170014	0	ARHGEF26-AS1	0.122257	0.040757	0	0.030605	0.068463	0.025384
ARHGEF28	29.4468	26.3203	27.1553	27.9341	25.5887	26.1516	ARHGEF28	35.5514	34.5156	33.5743	35.4627	35.1122	32.8364	ARHGEF28	27.7386	26.9665	25.3508	24.9953	26.8065	26.9494	ARHGEF28	44.8291	40.3162	46.4073	38.9937	46.2005	49.2371
ARHGEF3	9.27004	8.50938	8.43458	7.90751	7.98807	8.92949	ARHGEF3	25.2153	24.4359	24.8172	23.8315	23.9232	22.9819	ARHGEF3	4.60476	4.44506	4.03299	4.20904	3.976	4.39543	ARHGEF3	13.1156	14.3203	15.3063	12.7316	14.3591	15.1442
ARHGEF3-AS1	0	0	0	0	0	0	ARHGEF3-AS1	0	0	0	0	0	0
ARHGEF33	0	0.031905	0.030089	0.063554	0.025629	0.037247	ARHGEF33	0.042721	0.082865	0.094648	0.088798	0.113988	0.090297	ARHGEF33	0.036638	0.031125	0.019209	0.060855	0	0.018402	ARHGEF33	0.030848	0.072549	0.064865	0.115585	0	0.059724
ARHGEF34P	0.052713	0	0	0	0	0	ARHGEF34P	4.35331	3.38293	5.77885	3.76057	3.88588	3.33406
ARHGEF35	0.950379	0.69182	1.29922	1.05503	0.836746	0.85177	ARHGEF35	44.874	41.3535	43.5597	43.4739	46.7142	46.119
ARHGEF35-2	0	0	0	0.024913	0	0	ARHGEF35-2	1.19879	1.30384	1.30377	1.25828	1.00006	1.64774
ARHGEF35-AS1	0	0	0.375476	0.129093	0	0.270757	ARHGEF35-AS1	2.07034	2.62923	4.22557	3.25748	4.66108	3.9225
ARHGEF37	2.75146	2.08239	2.5528	2.29562	1.94034	2.30035	ARHGEF37	14.2264	14.6633	13.8701	14.0156	13.8368	14.5394	ARHGEF37	1.56345	1.65861	1.29883	1.64668	1.48401	1.57226	ARHGEF37	0.246251	0.170114	0.140298	0.223081	0.320499	0.148455
ARHGEF38	0.062055	0.063094	0	0.021552	0.059609	0	ARHGEF38	17.2953	17.2918	18.6541	19.1277	18.1142	16.979	ARHGEF38	0	0.016791	0	0	0	0	ARHGEF38	0	0	0	0	0	0
ARHGEF38-IT1	0	0.167999	0	0	0	0	ARHGEF38-IT1	0.319723	0.459555	0.551597	1.7826	0	0.448785
ARHGEF39	9.63261	10.3486	10.7944	10.16	9.84776	10.1748	ARHGEF39	2.26991	2.35155	2.01036	2.1516	2.71882	2.25853	ARHGEF39	22.2276	19.2274	19.621	21.5965	21.3919	22.1825	ARHGEF39	8.94653	8.06354	11.0375	9.5997	11.5807	10.6941
ARHGEF4	0.946808	0.84658	0.738174	0.549746	0.886916	0.670029	ARHGEF4	9.36586	9.44961	8.54788	8.65109	7.60302	7.5414								ARHGEF9	0	0	0	0	0	0
ARHGEF40	7.01713	7.15642	6.22466	8.36145	9.47099	9.13664	ARHGEF40	26.7467	26.0737	26.7471	29.0254	27.5596	26.5267	ARHGEF40	40.5096	39.9616	42.7475	42.9889	41.8698	42.6338	ARHGEF40	40.3946	37.773	41.4053	35.9564	42.0897	43.4598
ARHGEF5	4.03042	4.30314	3.88816	4.6008	4.74881	4.59781	ARHGEF5	33.7289	30.743	33.0021	31.9756	29.8338	32.3169	ARHGEF5	0.378085	0.283339	0.350659	0.309644	0.314323	0.335955
ARHGEF6	0.119786	0.045389	0.135411	0.105931	0.087547	0.113363	ARHGEF6	1.89591	2.17737	2.25696	2.06717	2.00163	1.95876	ARHGEF6	0.409061	0.13897	0.429624	0.257663	0.237714	0.274394	ARHGEF6	0	0	0	0	0	0
ARHGEF7	19.9495	17.3718	17.6542	18.6967	17.5759	18.1813	ARHGEF7	18.4013	18.1681	17.7777	18.8269	18.3674	18.1139	ARHGEF7	22.1917	19.4095	20.1644	20.1116	20.8597	20.5831	ARHGEF7	23.0699	22.8072	24.5819	20.748	23.5307	26.2167
ARHGEF7-AS1	0	0	0	0	0	0	ARHGEF7-AS1	0	0	0	0	0	0
ARHGEF7-AS2	0	0	0	0	0	0	ARHGEF7-AS2	0	0	0	0	0	0
ARHGEF9	7.02004	7.51965	6.66472	7.48949	7.43853	7.4561	ARHGEF9	6.14689	6.23715	6.03013	6.00267	6.32976	6.04266	ARHGEF9	0	0.173251	0.127193	0.132909	0.133368	0.040601
ARHGEF9-IT1	0	0	0	0	0	0	ARHGEF9-IT1	0	0	0	0	0	0
ARID1A	22.2925	20.1263	19.3092	23.1102	20.4393	20.6293	ARID1A	28.0665	25.1522	28.6811	25.511	27.125	23.2772	ARID1A	35.1885	30.1875	34.4365	35.5203	34.3716	35.8939	ARID1A	31.6248	27.4098	31.0594	27.445	31.8866	34.9062
ARID1B	16.1242	13.1535	13.1129	15.1359	13.6504	12.7955	ARID1B	16.1494	14.6666	16.0779	14.4667	15.2648	12.4994	ARID1B	21.2786	19.6267	19.8506	19.4551	19.4846	20.1068	ARID1B	11.6867	10.384	11.6228	9.2117	11.7141	13.2808
ARID2	16.4306	14.6999	13.575	14.1562	13.7688	14.038	ARID2	8.31033	8.23008	8.90881	8.42768	8.01408	7.3315	ARID2	15.1414	14.3785	14.3132	14.4802	14.6869	15.3651	ARID2	10.3897	10.1046	10.8236	9.84874	10.8876	11.2068
ARID3A	3.82915	3.72529	3.9352	3.66599	3.74899	3.69352	ARID3A	2.35911	1.85837	2.29011	1.82181	2.23992	1.88153	ARID3A	22.1482	22.6783	25.5553	23.9209	24.0173	24.2957	ARID3A	2.97279	2.62987	3.43323	2.55994	2.94208	3.33176
ARID3B	2.08377	1.66854	2.01816	1.93702	2.1303	1.78625	ARID3B	4.30163	4.43659	4.26152	3.81108	4.28701	4.11516	ARID3B	1.64142	1.28954	1.19237	1.50436	1.43077	1.76105	ARID3B	2.56839	2.41569	2.87196	1.75823	2.49302	2.70524
ARID3C	0.602024	0.531872	0.468101	0.663519	0.642065	0.544423	ARID3C	0.022277	0.021605	0.012994	0	0.023775	0.079053	ARID3C	0	0	0	0	0	0	ARID3C	0.170107	0.120536	0.158005	0	0	0.098622
ARID4A	6.6604	5.35468	5.83011	6.17684	5.41831	5.77203	ARID4A	7.80964	7.15026	7.34438	7.44447	7.12891	6.05008	ARID4A	7.85502	6.8554	7.61771	6.90379	7.47312	7.67152	ARID4A	10.9089	10.1362	12.5732	9.27855	11.4898	13.1026
ARID4B	16.5149	16.0096	16.547	20.5721	18.5993	19.8218	ARID4B	13.6478	13.3935	14.3304	14.5248	13.7373	13.8714	ARID4B	14.6704	14.37	15.0487	14.7361	15.0439	14.6841	ARID4B	12.569	11.3262	15.4058	9.70746	14.1524	16.263
ARID5A	2.49076	2.53804	2.75393	3.25004	3.30388	2.6589	ARID5A	4.20843	3.98444	4.53801	3.26129	3.89877	4.05816	ARID5A	4.93994	4.86473	5.20097	4.29025	3.9164	4.65616	ARID5A	6.98847	6.768	6.17899	5.2583	6.3021	7.08861
ARID5B	2.5178	2.32448	2.24988	2.42546	2.44611	2.48633	ARID5B	20.5277	19.2051	19.9316	19.947	19.454	18.446	ARID5B	75.9196	68.6927	70.5813	75.5583	73.6691	75.9199	ARID5B	31.4378	30.1041	31.8341	28.116	32.0045	35.2132
ARIH1	10.3787	9.7993	9.50802	10.1744	9.49875	9.66298	ARIH1	8.28686	8.31336	8.78309	8.16282	8.18963	8.09528	ARIH1	28.5715	27.0057	28.581	27.2344	27.5119	28.6793	ARIH1	31.335	30.9134	32.8802	29.3626	31.2559	32.4925
ARIH2	42.5722	41.6497	43.8294	42.7075	42.3178	40.0203	ARIH2	31.2641	29.3297	30.783	32.1654	30.5956	30.7708	ARIH2	61.2394	59.4416	61.1802	63.2133	62.2116	62.4387	ARIH2	56.4136	55.3775	56.1675	49.4641	55.5968	60.1386
ARIH2OS	0.968612	0.783133	0.404846	1.47261	1.1475	1.02683	ARIH2OS	0.859663	0.627427	0.424777	0.933744	1.10943	0.773528
ARK2C	0.21798	0.204723	0.228481	0.131896	0.268101	0.17836	ARK2C	2.39183	2.24925	2.63216	2.87685	2.6015	2.06784
ARK2N	9.29223	9.8283	9.03353	9.72495	9.58036	9.45859	ARK2N	16.471	16.0055	17.0696	16.2484	15.4066	16.0415
ARL1	41.9106	39.7548	40.746	38.0127	40.132	39.8131	ARL1	60.1043	61.6852	62.0358	62.9938	59.5836	59.1586	ARL1	73.4051	74.0516	75.5397	74.4784	77.6613	80.8064	ARL1	61.6734	62.1856	66.5657	57.2728	62.1105	60.1139
ARL10	0.118517	0.123802	0.048117	0.078801	0.142583	0.268006	ARL10	5.74588	5.54651	5.74413	5.45501	5.0379	5.26774	ARL10	52.1683	51.7534	54.6249	55.1544	50.3974	52.3495	ARL10	54.2364	55.1931	53.7067	54.2508	53.2883	52.9522
ARL11	0	0	0.015325	0	0.033094	0.015954	ARL11	0.013796	0.013471	0	0	0	0.029381	ARL11	0	0.228912	0.091627	0.093662	0.142836	0.087679	ARL11	0	0	0	0	0	0
ARL13A	0	0	0.107341	0.057596	0	0.056376	ARL13A	0	0	0	0	0	0.103097	ARL13A	0	0	0	0	0	0	ARL13A	0.030615	0.035914	0	0.038189	0.040987	0
ARL13B	13.3295	13.0713	12.7753	13.4996	13.1352	11.7339	ARL13B	8.41928	7.58974	8.72063	8.13578	7.97732	7.75903	ARL13B	8.69248	8.55408	8.98813	7.85662	9.23475	8.93459	ARL13B	20.783	19.0244	22.7644	19.5847	21.6781	20.2506
ARL14	0.954957	0.706281	0.689855	0.740374	1.19726	1.01417	ARL14	2.76265	3.27087	3.69371	3.45246	4.12755	3.05314	ARL14	2.0785	2.47614	2.31634	1.73596	1.7385	2.26935	ARL14	55.088	60.1005	61.2177	48.4997	52.1293	59.5577
ARL14EP	17.7657	17.698	15.8839	16.6292	16.53	16.2507	ARL14EP	20.139	20.0138	20.0377	19.523	19.0564	18.9567	ARL14EP	32.8522	32.4662	29.4804	27.7431	29.3807	30.1459	ARL14EP	26.4206	26.5034	26.0417	22.8077	25.1994	25.2827
ARL14EP-DT	0	0.050077	0	0.029842	0	0.032323	ARL14EP-DT	0	0.026817	0.058266	0	0	0.051958
ARL14EPL	0	0.060863	0.058999	0.216113	0.219	0.282235	ARL14EPL	0	0	0.122632	0	0	0.056126	ARL14EPL	0	0	0.228398	0	0	0	ARL14EPL	0	0	0	0	0	0.029529
ARL15	8.83489	8.31797	8.38086	8.09194	8.46338	9.26345	ARL15	6.20584	6.78352	6.18092	7.26906	6.19393	6.62165	ARL15	22.6895	20.6943	17.1584	22.6906	21.7095	17.1238	ARL15	32.4796	31.4502	32.3857	32.1447	33.3688	32.9598
ARL16	42.4947	41.4113	47.2359	42.4437	39.1574	40.4231	ARL16	54.6907	55.6394	56.6395	53.9426	53.4475	55.7329	ARL16	14.3861	15.8687	15.9605	14.7978	15.3035	14.9531	ARL16	19.2498	17.3217	17.1594	16.8972	18.9303	18.2767
ARL17A	3.88742	2.96396	2.75855	3.76685	3.75202	2.70131	ARL17A	3.94955	2.21663	3.40304	2.99085	3.72359	2.74944
ARL17A-2	5.46417	3.93657	5.98702	4.31866	5.29358	7.5502	ARL17A-2	1.61475	2.06141	1.94269	4.73443	2.26046	4.38701
ARL17B	1.93207	1.42344	1.73493	1.96134	0.614851	1.67061	ARL17B	1.18844	2.02657	2.07988	1.26915	1.62416	1.28472
ARL2	299.566	312.406	312.231	309.282	303.686	306.913	ARL2	153.225	149.079	145.062	143.092	152.416	150.182	ARL2	99.8219	106.56	105.111	99.9573	103.376	103.22	ARL2	172.364	169.66	162.068	174.357	165.937	171.099
ARL2-SNX15	0	0	0.146955	0.153198	0	0	ARL2-SNX15	0	0.126096	0.165017	0.195851	0	0
ARL2BP	103.947	101.638	94.9656	93.5891	92.9228	90.9835	ARL2BP	121.047	120.313	122.618	113.728	117.917	115.474	ARL2BP	112.725	112.024	109.984	116.337	112.986	113.183	ARL2BP	269.508	271.684	274.003	271.502	270.122	268.852
ARL3	30.2137	29.2577	28.4848	27.3848	27.5831	29.193	ARL3	18.0544	18.8578	17.5681	17.2632	16.4623	17.9524	ARL3	116.911	129.311	124.471	127.123	128.444	125.174	ARL3	79.6956	77.9436	80.3331	75.2392	83.2021	76.9707
ARL4A	24.1308	24.2793	24.2948	25.3637	23.0923	23.5228	ARL4A	9.64371	8.86159	9.59823	8.08298	9.10669	8.97345	ARL4A	8.19653	8.06018	7.911	7.65773	6.57345	8.19913	ARL4A	14.0466	12.9574	14.0974	12.8641	14.1306	13.3205
ARL4AP5	0	0	0	0.489734	0	0	ARL4AP5	0	0.269004	0	0	0	0
ARL4C	106.196	94.3684	104.95	111.493	96.7175	105.931	ARL4C	457.725	438.99	468.674	421.257	430.003	442.301	ARL4C	49.9357	50.7564	49.2392	50.4122	52.1377	49.4978	ARL4C	61.3636	64.5288	66.9823	63.7289	65.9385	62.8503
ARL4D	12.6395	14.0891	12.5552	13.7892	11.83	12.3361	ARL4D	20.5519	21.2917	20.4722	24.7291	23.1918	23.1791	ARL4D	11.323	10.1875	12.3887	11.6496	13.1533	10.4724	ARL4D	86.8369	89.9193	90.5276	86.3912	91.9621	90.2276
ARL5A	16.8262	16.7459	15.9893	15.2693	16.5467	15.6189	ARL5A	23.0972	22.0586	22.9069	23.0605	21.6877	21.0771	ARL5A	28.3878	26.476	27.6735	26.4209	27.6612	27.2598	ARL5A	51.1841	48.719	50.148	47.8154	48.327	54.2003
ARL5B	15.0925	13.6934	13.8882	15.9224	15.9113	14.6499	ARL5B	10.0872	10.0904	10.3961	9.31229	10.1023	9.02106	ARL5B	17.5538	15.2879	13.2687	16.4373	14.5952	16.3354	ARL5B	11.0719	12.5307	12.3141	11.8926	12.392	12.6307
ARL5C	0	0.013391	0.044677	0.015989	0.048958	0	ARL5C	0.03713	0	0.088368	0.037598	0	0.036867	ARL5C	0.092694	0.197136	0.144414	0.100342	0.151267	0.092187	ARL5C	0.040923	0.095857	0.083825	0.051003	0.109282	0.039285
ARL6	6.67613	6.90079	5.60269	6.00158	5.02158	5.6475	ARL6	5.19163	4.74779	4.43898	5.64789	4.64487	4.12155	ARL6	20.0729	19.5859	19.7607	17.1822	18.8333	18.3026	ARL6	42.5824	41.4166	46.8417	41.1893	43.0876	41.3584
ARL6IP1	415.184	417.423	404.813	381.702	401.392	396.206	ARL6IP1	223.405	235.346	228.952	224.496	233.219	219.311	ARL6IP1	253.009	247.385	248.473	236.525	250.888	242.751	ARL6IP1	187.316	193.046	199.17	178.007	194.976	186.625
ARL6IP4	287.991	289.344	277.917	288.256	278.021	273.706	ARL6IP4	259.463	260.819	245.955	257.681	248.777	259.862	ARL6IP4	75.6782	78.1336	74.1859	79.4366	72.5593	72.5852	ARL6IP4	95.7293	91.3013	99.2227	98.0288	101.777	96.1273
ARL6IP5	87.4446	80.3706	82.9159	74.9196	76.1432	76.2756	ARL6IP5	239.732	240.931	238.212	237.559	233.837	237.729	ARL6IP5	52.5134	53.9698	50.4813	53.4528	53.0771	51.6926	ARL6IP5	163.88	161.526	154.412	149.219	156.375	147.9
ARL6IP6	17.3319	17.2684	19.986	24.8193	22.5979	21.7654	ARL6IP6	24.8244	20.9365	23.8893	23.7985	25.6941	22.6076	ARL6IP6	52.4492	56.1327	52.2375	49.9425	54.1373	54.7127	ARL6IP6	39.2038	42.0111	42.0168	38.3548	41.5503	38.7022
ARL8A	49.9506	48.751	54.1241	48.5742	48.0029	51.3621	ARL8A	55.4892	54.1458	54.5954	53.402	50.2865	49.6552								ARL8A	81.6002	78.0427	83.7658	71.806	76.6609	79.4411
ARL8B	78.914	80.3566	75.275	73.5612	76.2003	73.6388	ARL8B	68.6472	71.0334	70.5035	70.972	72.6245	68.0835	ARL8B	115.201	112.856	112.441	110.477	110.004	110.768	ARL8B	256.18	254.391	248.439	243.27	243.127	237.381
ARL9	0	0	0	0	0.165657	0	ARL9	0	0	0	0.060892	0	0.043268	ARL9	0	0	0	0	0.102569	0.12674	ARL9	1.50134	1.87053	2.60709	1.85726	1.93233	1.96141
ARLNC1	0.173179	0.293137	0.250482	0.331048	0.256954	0.300599	ARLNC1	0.067625	0.043681	0.078804	0	0.09615	0.042314
ARMC1	46.4397	49.0849	45.3432	43.3877	43.625	42.231	ARMC1	25.6647	25.1307	25.7028	25.9498	27.0544	25.0658	ARMC1	51.0967	50.3822	48.0771	48.9687	49.5654	48.4617	ARMC1	44.1178	41.5245	49.7339	43.2389	45.4914	46.9486
ARMC10	65.0916	70.4325	63.9752	70.1694	68.8003	64.767	ARMC10	75.9328	74.7196	76.917	80.2297	78.1899	77.7833	ARMC10	61.0771	58.6565	56.9237	57.4554	56.4429	57.3331	ARMC10	97.942	101.8	104.753	96.6431	102.246	97.1632
ARMC12	0.422003	0.426315	0.52272	0.3526	0.399004	0.331345	ARMC12	0.11444	0.242707	0.046219	0.231702	0.112976	0.250142	ARMC12	0.087386	0.037165	0.159088	0.236994	0.022282	0.086991	ARMC12	0.510304	0.167948	0.394961	0.530281	0.666696	0.307185
ARMC2	2.28198	2.18875	2.28385	2.50091	2.07449	1.62893	ARMC2	2.76876	1.79558	1.95091	2.27081	2.48139	2.00387	ARMC2	0.578201	0.745318	0.856703	0.529162	0.72585	0.700565	ARMC2	0.823439	0.855603	0.916312	0.623983	0.780156	0.671918
ARMC2-AS1	0	0	0	0	0	0	ARMC2-AS1	0	0.081175	0	0	0	0
ARMC3	0.093852	0.093056	0.107611	0.104231	0.083533	0.134843	ARMC3	0.652094	0.353339	0.464521	0.395537	0.641417	0.392195	ARMC3	0.469138	0.614456	0.59417	0.605455	0.436774	0.569177	ARMC3	0.885156	0.958924	0.750468	0.758569	0.74613	0.805935
ARMC5	8.3924	8.05279	8.14231	8.31394	8.12043	8.80632	ARMC5	9.10389	8.3521	9.19678	8.58111	8.49362	7.98524	ARMC5	5.20879	4.83635	4.57432	4.67941	4.37312	4.1734	ARMC5	5.05599	5.43621	4.85706	5.2912	4.80065	4.59491
ARMC6	34.5568	38.6411	36.806	35.2808	32.4055	35.8165	ARMC6	46.4651	45.2107	45.507	42.37	41.0586	42.3127	ARMC6	15.596	16.6858	16.9732	17.7549	17.8837	17.0032	ARMC6	30.0558	28.0008	29.0195	27.9168	28.0185	27.8299
ARMC7	31.325	29.6073	29.57	27.3011	25.9605	29.2497	ARMC7	57.4779	50.7939	53.5074	47.8373	47.0728	48.7848	ARMC7	9.58745	9.55839	10.8607	11.3324	9.60273	10.1767	ARMC7	13.5711	14.0966	13.7854	9.97212	11.3855	16.3856
ARMC8	15.0066	15.0981	14.3816	14.049	16.0097	15.1862	ARMC8	22.1113	22.4944	21.5306	21.2316	21.3312	22.0605	ARMC8	15.8263	15.1392	15.1263	14.4599	14.7212	15.0715	ARMC8	16.4375	17.6176	17.2269	15.1864	19.5222	18.2921
ARMC9	7.62556	8.14126	9.1626	8.94781	6.92394	8.20518	ARMC9	29.4697	27.2938	27.0688	27.9506	27.3128	26.1553	ARMC9	13.4227	12.7182	12.9818	11.7892	13.1564	12.8934	ARMC9	11.5209	11.865	12.7015	11.7317	12.554	13.6511
ARMCX1	0.224779	0.095013	0.18466	0.226537	0.285787	0.083038	ARMCX1	23.8294	23.5917	22.9257	26.1298	25.1561	25.3483	ARMCX1	13.2423	12.7284	12.1927	12.7185	13.2939	12.1556	ARMCX1	17.0588	19.024	20.714	16.7707	19.7174	18.6242
ARMCX2	0.026267	0.019431	0	0.022667	0.103001	0.022657	ARMCX2	2.07288	1.97189	1.7482	1.57643	2.01029	1.99386	ARMCX2	2.49598	2.77887	2.47917	2.92297	3.00621	3.19521	ARMCX2	18.7994	17.96	19.3645	17.388	18.1157	17.467
ARMCX3	18.1198	16.6092	16.4091	16.2724	15.9423	16.9849	ARMCX3	35.2859	35.0147	35.4976	33.599	35.4014	34.8909	ARMCX3	0.715893	0.484465	0.505978	0.59568	0.445573	0.626648	ARMCX3	30.323	31.6383	32.0573	29.6059	30.5069	31.4677
ARMCX4	0.466516	0.205201	0.312561	0.346727	0.32885	0.345881	ARMCX4	2.10827	1.48646	1.86275	1.99424	1.90822	1.59243	ARMCX4	1.65613	1.42425	1.92376	2.42935	1.76058	1.80782	ARMCX4	0.043069	0.059163	0.096288	0.098685	0.125699	0.104514
ARMCX5	8.36889	8.04188	8.28215	6.58435	8.95464	7.48344	ARMCX5	8.02683	7.87829	7.2864	7.24936	7.94187	8.38896	ARMCX5	0.043256	0	0	0	0.141408	0	ARMCX5	3.9195	3.211	2.84163	3.35217	3.71358	3.77471
ARMCX5-GPRASP2	4.68949	4.94086	4.22517	4.85753	4.52456	3.23134	ARMCX5-GPRASP2	3.26153	2.76851	4.61355	4.88296	3.78395	4.1738
ARMCX6	43.3829	45.5011	48.0106	46.2385	44.399	49.321	ARMCX6	64.0042	63.5354	58.4193	66.3605	58.0537	62.0216	ARMCX6	0	0.049875	0	0	0.047504	0	LOC103299712	0.06143	0	0.062636	0	0	0.117163
ARMCX6	43.3829	45.5011	48.0106	46.2385	44.399	49.321	ARMCX6	64.0042	63.5354	58.4193	66.3605	58.0537	62.0216	ARMCX6	0	0.049875	0	0	0.047504	0	LOC103299723	0	0	0	0	0	0
ARMCX6	43.3829	45.5011	48.0106	46.2385	44.399	49.321	ARMCX6	64.0042	63.5354	58.4193	66.3605	58.0537	62.0216	LOC102883005	0	0	0	0	0.035613	0	LOC103299712	0.06143	0	0.062636	0	0	0.117163
ARMCX6	43.3829	45.5011	48.0106	46.2385	44.399	49.321	ARMCX6	64.0042	63.5354	58.4193	66.3605	58.0537	62.0216	LOC102883005	0	0	0	0	0.035613	0	LOC103299723	0	0	0	0	0	0
ARMH1	0.287853	0.312472	0.260199	0.301293	0.401426	0.252236	ARMH1	0.192425	0.240517	0.133115	0.11637	0.237264	0.329479	ARMH1	0.308459	0.245577	0.318884	0.298632	0.239351	0.174037	ARMH1	3.52874	3.23951	3.76476	3.30464	2.536	3.27596
ARMH2	0	0	0	0	0	0	ARMH2	0	0	0	0	0	0	ARMH2	0	0	0	0	0	0	ARMH2	0.215592	0.161012	0	0	0.091528	0.065682
ARMH3	17.1626	13.7915	15.2081	15.9674	15.0086	14.6195	ARMH3	17.3746	18.6301	17.5492	18.1959	17.6323	17.4631	ARMH3	20.6243	20.3433	20.9277	23.7414	20.3496	23.3578	ARMH3	17.4797	17.8404	17.5842	16.0534	17.1489	17.4509
ARMH4	0.21601	0.284005	0.341524	0.087037	0.16575	0.308861	ARMH4	6.3831	5.62661	5.7251	5.26669	5.74002	5.21427	ARMH4	2.435	2.18379	1.85135	2.04315	1.83332	2.19139	ARMH4	0.137578	0.089878	0.094469	0.152738	0.226021	0.103482
ARMS2	0	0	0	0	0.260293	0	ARMS2	0	0.068634	0	0.098891	0.151164	0.199555
ARMT1	30.1049	30.0344	28.5084	26.9499	26.937	26.4297	ARMT1	105.289	104.528	109.838	106.667	102.805	106.223	ARMT1	40.3844	41.2488	40.916	38.9538	41.7403	43.2398
ARNT	19.5412	18.7203	18.4122	18.6811	17.9761	17.5474	ARNT	18.632	17.394	18.3365	17.2106	17.2015	16.5037	ARNT	23.8262	24.5513	21.9804	23.4222	22.7863	22.6489	ARNT	19.1838	20.0126	19.3243	19.0379	18.5427	20.3633
ARNT2	16.7301	16.3559	14.9965	14.535	14.3358	15.1666	ARNT2	5.15433	5.03722	4.75125	5.24913	5.18434	4.52902	ARNT2	99.1382	93.5996	99.4909	95.2303	96.4926	95.0461	ARNT2	49.6447	48.9113	49.8997	49.8837	50.5159	55.4489
ARNT2-DT	2.54472	2.34109	2.52692	2.68969	2.03375	1.69007	ARNT2-DT	0.590751	0.215798	0.216288	0.398641	0.315463	0.206446
ARPC1A	155.065	157.089	151.602	137.794	140.253	136.361	ARPC1A	142.405	142.722	139.476	134.682	131.081	130.088	ARPC1A	109.516	111.115	114.012	111.803	114.82	112.198	ARPC1A	116.246	112.79	119.691	104.657	118.694	117.518
ARPC1B	280.015	278.191	277.308	267.512	270.096	285.881	ARPC1B	439.133	444.351	438.752	421.787	430.661	432.239	ARPC1B	103.61	102.944	106.81	106.538	104.359	105.558	ARPC1B	540.558	547.062	548.753	494.625	568.146	558.307
ARPC2	244.184	236.909	241.274	232.224	228.795	237.247	ARPC2	520.576	539.389	535.847	515.705	527.941	526.429	ARPC2	708.373	688.72	690.789	710.231	706.366	691.744	ARPC2	1037.87	996.309	1004.96	972.1	1032.75	1019.27
ARPC3	651.025	645.66	642.317	619.021	643.679	629.957	ARPC3	593.108	601.474	583.774	607.004	592.844	614.691	ARPC3	360.82	337.933	333.075	356.165	355.542	363.23	ARPC3	402.812	424.4	404.675	401.296	409.659	414.926
ARPC4	226.032	218.777	236.347	216.272	213.718	216.094	ARPC4	293.617	298.295	300.067	288.568	285.483	281.386	ARPC4	188.268	200.453	207.482	211.21	206.373	203.824	ARPC4	225.616	237.183	225.65	224.476	228.238	224.176
ARPC4-TTLL3	1.89011	1.91004	2.00542	1.70874	2.0173	1.79557	ARPC4-TTLL3	3.48086	3.05331	3.1751	3.31889	2.57388	3.28287
ARPC5	63.305	61.3351	62.1053	60.0739	62.2081	64.4315	ARPC5	54.3092	53.7489	54.2886	52.7939	53.8515	54.098	ARPC5	106.44	105.379	107.422	107.997	111.138	105.627	ARPC5	283.191	279.562	279.553	263.03	270.666	268.111
ARPC5L	39.886	39.4009	40.8011	37.2631	37.4188	37.5278	ARPC5L	57.8664	56.006	57.7273	56.1234	57.1133	56.2903	ARPC5L	86.3527	89.3237	86.4842	86.802	89.6567	90.2904	ARPC5L	122.764	125.375	126.245	117.644	123.259	132.194
ARPIN	18.602	18.7695	17.5327	16.0763	19.6932	17.3872	ARPIN	6.21414	6.90447	7.07178	6.80127	8.16105	6.1271	ARPIN	17.3349	18.4187	17.8013	16.9014	18.7819	16.9558
ARPIN-AP3S2	11.1212	10.1033	10.2766	10.4319	11.9083	11.31	ARPIN-AP3S2	6.56348	6.29645	5.57389	7.372	5.15842	7.40743								ARPIN	17.1547	16.578	18.2361	14.7099	17.7868	19.247
ARPP19	105.764	103.634	103.769	96.2639	97.2669	98.297	ARPP19	74.8207	75.2869	77.9755	70.0291	72.5733	65.7643	ARPP19	83.4867	79.416	78.6122	79.044	81.0167	81.7898	ARPP19	270.862	274.442	275.397	269.353	277.196	285.886
ARPP21	0.020454	0	0.044551	0.018069	0.036446	0.018886	ARPP21	0	0	0	0	0	0	ARPP21	0	0	0	0	0	0	ARPP21	0	0	0	0	0	0.016922
ARR3	0	0	0	0	0	0	ARR3	0	0.039226	0	0	0	0	ARR3	0	0	0	0	0	0	ARRB1	4.01606	4.24364	4.12249	3.55642	3.98118	4.07497
ARRB1	14.9889	12.9112	16.0168	11.8486	9.68651	13.124	ARRB1	28.1535	26.5031	26.9492	26.5722	24.0322	25.3826	ARRB1	1.53976	1.17165	1.05423	0.881374	0.663272	1.33261
ARRB2	94.7882	106.208	99.3546	90.0586	101.295	88.5429	ARRB2	10.0901	10.7843	9.57682	11.1067	9.79914	10.8887	ARRB2	97.0276	99.1573	94.8703	92.0107	97.4321	95.9738	ARRB2	31.6559	34.7114	34.4094	29.9136	32.9943	32.5144
ARRDC1	32.076	29.4707	30.9485	27.8752	28.2002	30.26	ARRDC1	93.4453	85.5867	87.1428	88.9668	84.8314	84.9337	ARRDC1	5.67169	7.6838	7.61584	6.99848	7.36858	6.90322	ARRDC1	109.734	104.537	106.648	98.6894	107.399	102.673
ARRDC1-AS1	12.5417	12.9302	13.2025	13.167	12.2861	11.7338	ARRDC1-AS1	7.62152	8.24696	7.73121	9.03333	7.63575	7.16537
ARRDC2	19.3543	20.2168	19.4798	19.9699	19.4802	19.102	ARRDC2	11.0285	10.614	11.5995	10.6909	11.2782	10.2544	ARRDC2	13.3253	13.9263	11.8499	11.6938	13.772	12.5241	ARRDC2	12.5589	11.1759	13.9273	11.4674	12.4917	13.2494
ARRDC3	14.9252	13.1208	12.8528	16.1256	20.4024	18.6949	ARRDC3	50.6542	55.1998	54.2143	54.2164	59.7227	49.2205	ARRDC3	63.2127	58.3745	63.4808	61.5086	61.6435	65.5571	ARRDC3	4.78298	5.99984	4.42238	5.52417	5.44155	5.04634
ARRDC3-AS1	0.504204	0.551574	0.324009	0.509946	0.423403	0.488731	ARRDC3-AS1	0.336565	0.592604	0.429916	0.731308	0.550694	0.838409
ARRDC4	0.111847	0.248231	0.171035	0.169493	0.185134	0.15177	ARRDC4	7.11911	7.27203	7.16971	8.06367	8.68674	8.05803	ARRDC4	42.7388	41.2736	41.1688	39.9962	40.2092	41.0228	ARRDC4	21.8378	20.2595	21.9117	20.4443	22.5797	24.023
ARRDC5	0	0	0	0	0	0	ARRDC5	0	0	0	0	0	0	ARRDC5	0.019476	0.016539	0.030724	0.032578	0.072911	0.078497	ARRDC5	0.099962	0	0	0	0.066579	0
ARSA	11.3254	10.1841	10.4729	11.9259	10.7603	11.7861	ARSA	15.8709	14.2514	14.2699	14.9543	14.8472	14.8433	ARSA	49.337	53.842	52.5536	45.0791	48.7292	48.9734	ARSA	59.2747	56.042	56.2182	55.2957	54.2828	56.8158
ARSB	13.7241	13.7016	13.1565	13.6663	13.742	15.3476	ARSB	11.9074	12.1776	11.6726	12.0137	12.1398	10.4338	ARSB	14.4936	14.8006	15.5434	14.6412	15.4225	15.9213	ARSB	85.2335	85.1849	90.7743	81.6555	87.4781	90.9164
ARSD	20.8987	20.5094	20.0638	20.5676	22.6419	23.2477	ARSD	30.8205	31.5592	31.7265	30.3757	31.3217	30.2429	ARSE	0	0	0.033276	0	0	0	LOC129150073	17.0168	18.0322	19.3584	19.1705	18.9521	18.3305
ARSD	20.8987	20.5094	20.0638	20.5676	22.6419	23.2477	ARSD	30.8205	31.5592	31.7265	30.3757	31.3217	30.2429	ARSH	0.034534	0.02936	0	0	0	0.034489	LOC129150073	17.0168	18.0322	19.3584	19.1705	18.9521	18.3305
ARSD	20.8987	20.5094	20.0638	20.5676	22.6419	23.2477	ARSD	30.8205	31.5592	31.7265	30.3757	31.3217	30.2429	LOC102897599	0.652461	0.443736	0.476587	0.357065	0.402173	0.456445	LOC129150073	17.0168	18.0322	19.3584	19.1705	18.9521	18.3305
ARSD-AS1	0	0	0	0	0	0	ARSD-AS1	0.134202	0	0.077852	0	0.14265	0.188705
ARSF	0.0313	0	0	0	0.058402	0	ARSF	0	0.023798	0	0	0	0.023743								ARSF	0	0	0	0	0	0
ARSG	2.11239	1.77334	1.73998	1.89127	2.51882	2.32172	ARSG	7.01379	7.63222	7.8544	7.94645	8.25506	7.26698	ARSG	1.77667	1.8113	1.4276	1.5502	1.71519	1.80358	ARSG	1.88391	1.94286	2.09698	1.94415	1.83425	2.04442
ARSH	0	0	0	0	0	0	ARSH	0	0	0	0	0	0								ARSH	1.97585	1.6611	1.75566	1.83243	1.18085	1.26182
ARSI	4.21082	4.06989	4.0217	3.40165	3.14806	3.28704	ARSI	0.941371	0.943032	0.878181	0.790975	0.703044	0.780868	ARSI	136.642	138.653	146.055	150.887	143.476	146.742	ARSI	0.616348	0.42447	0.502824	0.29185	0.370805	0.492826
ARSJ	4.95541	4.99884	4.41812	5.40717	5.0764	5.70644	ARSJ	33.1946	32.7102	33.3012	32.8504	33.1228	31.6805	ARSJ	0.125825	0.10696	0.065675	0.103386	0.129343	0.094351	ARSJ	101.043	92.8117	96.6547	90.5809	99.1317	104.01
ARSK	9.17588	9.53476	10.1131	11.2073	9.89823	9.43793	ARSK	10.7467	8.55446	9.79552	10.3543	8.96428	10.0891	ARSK	25.4706	27.1073	25.0071	26.2454	26.0441	24.962	ARSK	24.3383	22.7074	26.0848	22.3794	23.0512	26.5606
ARSL	80.1519	79.9953	74.2132	80.4083	77.8905	80.9745	ARSL	7.66184	6.73064	7.55863	7.24102	8.38265	6.79461								ARSL	30.7842	30.3528	30.3545	28.4212	33.2605	32.4694
ART1	0.054879	0.243533	0.134816	0.255274	0.146226	0.18875	ART1	0	0	0	0	0	0	ART1	0	0	0	0	0	0	ART1	0	0	0	0	0	0
ART3	0	0	0	0	0	0	ART3	0	0	0	0	0	0	ART3	0	0	0	0.020076	0.015013	0.01821	ART3	0.927448	1.24843	1.40927	1.54205	1.41348	1.25575
ART4	0.012468	0	0.010269	0.013859	0.012638	0.011551	ART4	0.023558	0.029596	0.010839	0.013016	0.020616	0	ART4	0.028995	0.04929	0.030294	0.063659	0.023876	0.029015	ART4	0.027357	0.064218	0.037967	0.046177	0	0
ART5	0.355423	0.78859	0.86873	0.26013	0.473325	0.560011	ART5	0.183827	0.088539	0	0	0.099811	0	ART5	0.243736	0.138468	0	0.085562	0	0.079816	ART5	2.54981	2.6947	2.53156	1.95298	2.05919	2.43542
ARTN	0.088227	0.414525	0.145169	0.459861	0.251034	0.190336	ARTN	0.564669	0.546292	0.710379	1.16795	0.542346	0.90735								ARTN	0.588067	0.983745	0.688169	0.418779	0.504629	0.72557
ARV1	42.8482	45.8133	40.6922	40.306	41.7638	37.5738	ARV1	21.9712	22.9793	22.5086	21.3618	22.0884	22.2241	ARV1	49.7417	49.9767	49.2686	45.1103	50.0488	49.6194	ARV1	20.2254	21.2339	20.7367	19.7928	19.7275	22.5261
ARVCF	0.998284	1.17024	1.16349	0.943763	0.921584	0.974113	ARVCF	9.68447	8.16022	9.28145	8.31649	8.19388	8.49016	ARVCF	9.64307	10.6475	10.4421	9.43724	9.72646	9.89785	ARVCF	2.36887	2.73958	2.91615	2.03328	2.98085	2.35346
ARX	4.27856	4.79127	3.65129	3.85907	4.32054	3.27694	ARX	0.135652	0.164367	0.059311	0.094967	0.162803	0.206981	ARX	0	0.070905	0	0	0.133198	0	ARX	0	0	0	0.037468	0	0
AS-PTPRE	0	0	0	0	0	0	AS-PTPRE	0	0	0	0	0	0
AS3MT	4.22792	4.93663	4.38034	3.93893	4.30368	4.07182	AS3MT	0.356182	0	0.381051	0.088594	0	0.247849	AS3MT	0	0	0	0.055999	0	0
ASAH1	108.369	102.199	101.267	98.0998	105.801	103.593	ASAH1	125.255	130.246	129.562	134.449	134.524	131.607	ASAH1	79.2939	78.3253	72.2326	70.6917	77.6268	74.2817	ASAH1	316.556	302.055	331.306	288.219	333.179	328.883
ASAH1-AS1	0.263042	0.412837	0.779614	0.746218	1.01481	0.144318	ASAH1-AS1	0.215832	0.64904	0.243601	0.570039	0.645903	0.672599
ASAH2	0.325979	0.164494	0.323489	0.35437	0.226476	0.250233	ASAH2	0.996323	0.711816	0.927434	0.870358	0.843918	0.896263	ASAH2	0.024821	0	0	0	0	0.024875	ASAH2	33.9923	31.1078	29.413	26.8815	28.4314	29.0122
ASAH2B	4.14809	4.22965	3.70186	4.92877	4.67561	4.27386	ASAH2B	3.46362	3.86943	4.02	4.30758	4.30257	4.02321								ASAH2	33.9923	31.1078	29.413	26.8815	28.4314	29.0122
ASAP1	51.3785	44.5029	45.8902	54.6237	48.422	48.2451	ASAP1	19.9224	18.7481	20.4759	19.0722	18.5732	17.054	ASAP1	31.32	28.151	27.8806	29.7804	28.9238	30.406	ASAP1	26.4825	25.8149	26.8013	23.48	28.4133	31.1494
ASAP1-IT1	0	0	0	0	0	0	ASAP1-IT1	0	0	0	0	0	0
ASAP1-IT2	0	0.025191	0.027729	0.120937	0	0.029031	ASAP1-IT2	0	0.024096	0.058773	0	0	0
ASAP2	21.093	19.6528	19.2646	17.0441	17.1281	16.9272	ASAP2	66.2005	61.4592	65.5657	63.3011	65.991	61.1752	ASAP2	39.4545	34.0603	36.6069	34.2024	34.9286	37.0175	ASAP2	60.7716	59.5472	65.8487	54.7853	65.2143	71.1735
ASAP3	2.85005	2.76963	2.46727	2.60079	2.942	3.45265	ASAP3	6.44201	6.77235	7.21254	5.54246	4.78541	6.90742	ASAP3	7.74043	8.01829	6.87381	7.0366	6.66361	7.59248	ASAP3	3.05142	2.56646	2.73885	2.55119	3.04403	2.95756
ASAP3-2	0	0	0	0	0	0	ASAP3-2	0.714871	0	0	1.96713	2.29703	0
ASB1	10.4919	10.8241	10.8347	7.62522	8.03742	8.02896	ASB1	13.3338	12.9328	14.0365	12.7926	12.8067	11.6093	ASB1	5.47773	6.50358	5.84457	5.61838	5.64639	6.37972	ASB1	16.5603	16.2206	16.3746	12.5816	13.9616	16.4873
ASB10	0	0	0	0	0	0	ASB10	0	0	0	0	0	0	ASB10	0.042582	0.132453	0	0	0	0.084811	ASB10	0	0.034956	0	0	0	0
ASB11	0	0	0	0	0.022283	0	ASB11	0	0	0	0	0	0.047868	ASB11	0.076573	0	0	0	0.106839	0.043387	ASB11	0	0	0	0	0	0
ASB12	0.229272	0.25435	0.234596	0.10071	0	0.264811	ASB12	0.042059	0.08137	0.146754	0	0.050824	0.041333	ASB12	0	0	0	0	0	0	ASB12	0	0	0	0	0	0
ASB13	27.2894	28.5504	26.5205	22.7183	24.736	24.6201	ASB13	29.0613	28.2846	26.6384	27.1802	25.879	26.8285	ASB13	7.57637	8.25386	8.06362	7.63104	7.51496	7.92077	ASB13	4.24833	4.15687	3.84854	3.40819	4.12627	4.06734
ASB14	0	0	0.025284	0	0	0	ASB14	0	0.066133	0	0	0	0.028745	ASB14	0.016639	0	0.017458	0.01845	0	0.016724	ASB14	0	0	0	0	0	0.027191
ASB15	0	0	0	0	0	0	ASB15	0	0	0	0	0	0	ASB15	0.032419	0.19292	0.135326	0.035489	0.106588	0.162009	ASB15	0.079482	0.0933	0.244989	0	0.071016	0.332198
ASB15-AS1	0	0	0	0	0	0	ASB15-AS1	0	0	0	0	0	0
ASB16	0.159114	0.023759	0.078336	0	0.056573	0	ASB16	0	0	0.027337	0.033057	0.025053	0	ASB16	0	0.047103	0.057928	0.060901	0.068499	0.055484	ASB16	0.037858	0	0	0	0.050589	0.036379
ASB16-AS1	6.7074	6.08162	5.90332	6.62171	7.99064	5.81099	ASB16-AS1	4.68166	5.04088	4.96723	4.4005	3.62317	4.06558
ASB17	0	0.069438	0	0.082049	0.083115	0	ASB17	0	0	0	0	0	0	ASB17	0	0	0	0	0	0	ASB17	0	0	0	0	0	0
ASB18	0	0.01705	0	0.020365	0	0	ASB18	0	0	0	0	0.01858	0	ASB18	0	0	0	0	0	0	ASB18	0	0	0	0	0	0
ASB2	0	0.022071	0.049039	0.078961	0.02656	0	ASB2	2.3664	2.03496	2.09028	2.17246	2.02542	2.02385	ASB2	0	0	0	0	0	0	ASB2	0	0.044644	0.019547	0	0	0
ASB2-2	0	0	0	0	0	0	ASB2-2	0	0	0	0	0	0
ASB3	13.4596	13.8829	14.7877	13.6843	14.0605	12.6601	ASB3	12.0518	12.6611	11.8008	11.0137	8.93769	11.7182	ASB3	16.703	15.9762	16.7693	16.0791	16.3409	17.1272	ASB3	13.247	13.268	13.1948	13.1864	12.965	13.8899
ASB4	3.28327	2.9261	2.0837	2.36521	2.59913	2.82801	ASB4	0.046772	0.088164	0.094652	0.060003	0.05663	0.099727	ASB4	0	0	0	0	0	0	ASB4	0	0	0	0	0	0
ASB5	0	0	0	0	0	0.017521	ASB5	0.048417	0.064332	0.03869	0	0.017218	0.015579	ASB5	1.14863	0.712474	0.453162	0.745132	0.811633	0.88287	ASB5	0.166759	0.289006	0.555161	0.051956	0.222616	0.270989
ASB6	12.027	13.0027	13.2551	12.2834	11.8682	12.1456	ASB6	23.8819	24.0793	23.3391	22.2716	21.9124	22.0035	ASB6	41.604	45.4044	41.4747	37.7283	38.2732	42.3238	ASB6	44.8228	42.2417	45.9756	39.7748	42.8633	43.4915
ASB7	16.3283	15.4564	14.313	16.176	14.81	16.6902	ASB7	11.895	11.461	10.7008	11.9826	12.7811	12.0231	ASB7	5.50174	5.12255	5.5034	5.94165	5.35513	5.69366	ASB7	9.14763	8.48112	9.61942	9.27964	7.9891	10.3808
ASB8	20.7537	19.4355	19.1681	18.2935	18.0419	17.5137	ASB8	22.8161	22.6477	22.5018	23.6787	20.7906	20.9305	ASB8	22.7863	22.2982	24.376	20.1895	21.8176	23.1974	ASB8	13.0124	11.1944	13.0913	11.378	13.3149	12.1765
ASB9	20.3592	19.2772	21.0524	18.0028	18.867	19.3634	ASB9	5.5866	6.75289	6.49264	6.52618	6.07952	7.90967	ASB9	24.4295	25.2565	24.7407	24.1693	23.7888	25.341	ASB9	1.68679	1.46588	1.62627	1.56077	1.66994	1.6616
ASB9P1	0	0	0	0	0	0	ASB9P1	0	0	0	0	0	0
ASCC1	43.7984	43.7512	44.2419	42.521	44.174	43.4876	ASCC1	42.851	41.7747	42.5459	42.137	41.2287	41.4686	ASCC1	32.6311	30.3481	29.9295	30.0562	30.7194	30.4076	ASCC1	18.7017	20.2393	19.9549	18.0309	19.7189	19.669
ASCC2	30.6541	30.5706	28.3743	30.2536	29.3219	29.4026	ASCC2	42.5709	43.0394	43.8042	41.2317	40.711	38.3736	ASCC2	26.2952	26.1324	26.7512	27.0432	26.1073	26.7447	ASCC2	34.3981	34.6947	34.6751	32.611	35.1184	35.8593
ASCC3	18.8299	17.4543	16.9178	19.9088	17.0822	19.3819	ASCC3	27.7102	26.739	27.2923	27.4947	27.6165	25.3655	ASCC3	16.9846	15.2629	16.1692	16.4589	17.5143	16.9589	ASCC3	16.9281	16.7923	17.7747	16.4242	18.6471	18.6761
ASCL1	0.054171	0.039999	0	0.023867	0	0.023317	ASCL1	0	0	0	0.02796	0	0	ASCL1	1.12686	1.0974	0.934251	0.932975	0.774248	0.790946	ASCL1	0	0	0	0	0	0
ASCL2	0.286161	0.211655	0.039094	0.04196	0.127161	0.492491	ASCL2	0.035094	0	0	0.049014	0.074777	0								ASCL2	1.29365	1.29238	1.17064	1.42426	1.42098	1.43801
ASCL3	0	0	0	0	0	0	ASCL3	0	0	0	0	0	0	ASCL3	0.100601	0.171195	0.208698	0.217161	0.122894	0.349776	ASCL3	10.1525	9.60188	8.22297	9.89444	8.44997	9.80942
ASCL4	0	0	0	0	0	0	ASCL4	0	0	0	0	0	0	ASCL4	0	0	0	0	0	0	ASCL4	0	0.277027	0.181485	0.147602	0.236429	0.22637
ASCL5	0	0.049535	0.055003	0.059041	0.059592	0.028857	ASCL5	0.049477	0	0	0	0.079129	0								ASCL5	0	0	0	0	0	0
ASDURF	16.1455	11.9943	11.4992	13.6113	13.6137	15.815	ASDURF	7.52183	10.8448	9.08076	12.7131	8.01492	9.94983	ASDURF	57.9051	58.3198	53.4707	51.5195	50.3142	58.0533	ASDURF	109.685	107.014	116.206	106.39	115.327	121.199
ASF1A	19.2046	18.4254	18.256	16.6552	17.0007	16.706	ASF1A	24.7969	24.7083	26.0551	24.3435	25.5768	24.0773	ASF1A	23.7275	22.8341	23.0288	24.116	23.5059	23.3391	ASF1A	38.0703	44.0388	39.9177	38.4626	39.0084	40.0997
ASF1B	50.3707	54.8336	53.7686	46.9331	50.2507	49.4062	ASF1B	47.3106	48.3085	51.7995	46.8905	50.048	43.5387	ASF1B	63.3821	69.7427	64.7503	65.5069	65.6675	65.4825	ASF1B	67.8903	68.645	65.7264	66.4114	69.9292	69.1466
ASGR1	0	0.182031	0.302037	0.290659	0.163856	0.331774	ASGR1	0.1619	0.043613	0	0	0.144036	0.042257	LOC102879196	0	0	0	0.118722	0.102045	0	ASGR1	0	0	0	0	0	0.059141
ASGR2	0	0.045105	0.049897	0.107098	0	0	ASGR2	0.03801	0	0	0	0	0	LOC102878439	0.113001	0.160148	0.19619	0.12318	0.123499	0.11273	LOC129147340	0.181044	0	0.061547	0.069736	0	0.05757
ASH1L	15.8356	13.8713	13.4852	15.1515	13.1292	13.1933	ASH1L	15.658	15.535	16.319	15.2596	16.1048	13.319	ASH1L	26.0173	21.2286	22.5851	22.2849	23.1364	24.0609	ASH1L	8.42744	7.25066	8.6103	6.74492	8.55419	9.66992
ASH1L-AS1	1.40252	0.993522	1.4386	1.748	2.32905	1.57618	ASH1L-AS1	1.45239	1.4836	0.905677	1.28499	1.04589	1.44836
ASH2L	32.0458	32.6727	30.5036	30.8586	32.1419	32.9339	ASH2L	32.3695	34.4013	33.7579	32.0816	33.7271	33.7815	ASH2L	43.6419	42.6559	43.4663	43.9017	43.697	44.0979	ASH2L	52.0462	53.7938	53.0953	50.8313	55.7826	54.5253
ASIC1	6.99601	6.92675	6.9868	6.01681	7.69454	6.75935	ASIC1	1.52382	1.89875	1.44957	1.4973	1.93796	1.36868	ASIC1	0.030243	0.089907	0.04762	0.067152	0.087375	0	ASIC1	0.029145	0.137754	0.029926	0.039801	0.078687	0
ASIC2	0.532948	0.606822	0.818707	0.399306	0.324169	0.285057	ASIC2	1.85547	1.4997	1.655	1.26493	1.27959	1.77856	ASIC2	0	0	0	0	0	0	ASIC2	0.220898	0.453696	0.425445	0.118385	0.443953	0.372716
ASIC3	1.92022	1.53721	2.0802	1.4593	3.10252	2.23979	ASIC3	0	0.071247	0.057125	0.228774	0.130693	0.138038	ASIC3	0	0	0	0	0	0	ASIC3	24.3165	25.5785	22.8039	22.4497	22.806	23.1904
ASIC4	0.012959	0.019174	0.072611	0.057302	0	0.011194	ASIC4	0	0	0	0	0	0	ASIC4	0.059047	0.025095	0	0	0.024304	0	ASIC4	0.094543	0.225039	0.223034	0.116161	0.171195	0.179375
ASIC4-AS1	0	0	0	0	0	0	ASIC4-AS1	0	0	0	0	0	0
ASIC5	0	0	0	0	0	0	ASIC5	0	0	0	0	0	0	ASIC5	0	0	0	0	0	0
ASIP	0	0	0	0	0	0	ASIP	0	0	0.110282	0	0	0	ASIP	0	0.044388	0.018138	0	0.007274	0	ASIP	0.12442	0.143892	0.125219	0	0	1.04873
ASL	14.5427	15.0353	14.4948	13.1712	15.361	14.7984	ASL	48.2487	49.1779	48.9211	51.1184	48.6549	48.2121	ASL	12.4673	13.0727	10.2847	10.4117	12.138	11.2314	ASL	60.5152	63.1804	56.3142	55.7621	58.7993	58.6239
ASMER1	4.21659	4.0098	4.25058	4.43542	3.97752	4.25869	ASMER1	0.775642	0.693216	0.712721	0.67386	0.599416	0.749868
ASMER2	0	0	0	0	0	0	ASMER2	0	0	0	0	0	0
ASMT	0	0.043232	0	0	0.103801	0	ASMT	0	0	0	0.056651	0	0	ASMT	0	0	0	0.060657	0	0	ASMT	0.051905	0	0	0	0	0
ASMTL	13.2192	11.7948	11.7884	11.1219	10.991	11.7104	ASMTL	16.492	18.7926	17.8005	17.3484	17.9908	17.6176	ASMTL	8.80823	9.2454	8.66769	8.40042	8.34407	9.26994	ASMTL	18.1832	19.9415	20.3055	17.1124	20.0926	18.8479
ASMTL-2	0.148499	0	0.360776	0.1237	0.103598	0.111934	ASMTL-2	0	0	0.193579	0.54658	0.189107	0.758677
ASMTL-AS1	0.338288	0.393495	0.1432	0.456757	0.529463	0.311628	ASMTL-AS1	0.696444	0.751178	0.825695	0.776514	1.23286	0.621958
ASNS	116.674	130.692	107.192	124.568	122.881	96.197	ASNS	13.8215	13.3416	13.3943	19.2755	21.1605	15.1338	ASNS	123.746	117.172	120.048	120.346	120.476	122.875	ASNS	43.252	45.6071	40.135	39.8496	42.7348	43.6375
ASNSD1	28.7664	28.2555	27.5869	24.5588	26.4066	23.0599	ASNSD1	27.8462	28.7158	28.4963	28.3022	27.3998	28.1147	ASNSD1	45.5819	46.252	48.5227	47.928	46.6759	47.0123
ASNSP1	0.146571	0	0.080155	0.08616	0.130517	0	ASNSP1	0	0	0	0	0	0
ASPA	0.013283	0.03039	0	0.036935	0.022344	0.068453	ASPA	0	0.008696	0.010458	0.04113	0.009655	0	ASPA	0.062322	0	0	0.06123	0	0	ASPA	1.75475	2.25962	3.05326	1.63986	1.87296	1.68291
ASPDH	0	0	0	0	0	0	ASPDH	0	0	0	0	0	0	ASPDH	0	0	0	0	0	0	ASPDH	0	0	0	0	0	0
ASPG	0.037049	0	0.06083	0	0	0.033382	ASPG	0.09758	0.127032	0.03575	0.1477	0.18444	0.07697	ASPG	0	0	0	0	0	0	ASPG	0	0.032447	0.056796	0	0.037042	0.053311
ASPH	674.888	669.354	649.252	620.563	675.289	659.307	ASPH	154.374	153.285	162.024	152.678	156.862	156.526	ASPH	53.3987	51.7679	51.9834	51.7351	53.1912	53.0373	ASPH	34.7331	33.7186	37.3878	33.1954	37.9616	38.412
ASPHD1	9.88546	11.4978	11.7283	10.7651	10.9626	12.6137	ASPHD1	14.453	12.9551	12.8718	13.2553	13.9109	14.3395	ASPHD1	0.728535	0.697206	1.04074	1.33171	1.33808	0.996551	ASPHD1	0.140325	0	0.143534	0.116538	0	0.044817
ASPHD2	1.77009	1.35277	1.48881	1.56391	1.35185	1.47754	ASPHD2	8.2828	7.68084	7.64027	8.40785	7.74457	8.40215	ASPHD2	5.06757	4.65515	4.74555	4.63123	4.69312	4.59593	ASPHD2	10.0994	8.91024	8.21104	8.66215	9.32034	9.39042
ASPM	27.1408	26.2195	23.5406	25.1684	27.5025	26.108	ASPM	8.54011	8.13376	8.90107	8.03431	9.01695	7.20598	ASPM	33.2969	27.9509	30.8238	31.094	31.3939	31.7108	ASPM	23.3437	20.4585	22.9989	18.9312	24.5041	25.9271
ASPN	0	0	0	0	0	0	ASPN	0.040199	0.077913	0.05213	0	0.047703	0.056605	ASPN	0.06982	0	0.024363	0.051334	0.096111	0.046674	ASPN	0.070126	0.10981	0.240334	0.087527	0.219478	0.135413
ASPRV1	0.495227	0.493623	0.358105	0.43473	0.294066	0.323235	ASPRV1	0.091896	0.568958	0.374534	0.243858	0.170632	0.327512	ASPRV1	0	0	0	0	0.044348	0	ASPRV1	0.259756	0.342706	0.499751	0.566944	0.564839	0.625122
ASPSCR1	25.2612	25.8076	25.0515	22.1356	25.4437	24.8282	ASPSCR1	27.1553	23.8095	25.5484	22.6194	23.4418	25.5015	ASPSCR1	41.1135	40.8765	43.6775	37.315	39.319	38.9948	ASPSCR1	60.6209	62.7303	57.2018	56.6203	59.3875	61.0591
ASRGL1	28.1155	27.571	27.1074	26.4266	24.7452	26.3396	ASRGL1	69.4515	67.0775	67.4545	66.279	68.8068	69.5568	ASRGL1	1256.05	1304.43	1262.49	1245.55	1283.38	1254.59	ASRGL1	1.74827	1.91234	2.03018	2.03459	2.45099	2.08927
ASS1	24.1988	26.5805	25.4423	23.3781	26.6422	25.9426	ASS1	66.4527	65.9715	64.5389	71.271	63.7707	67.2882	ASS1	1.51916	1.3532	1.01785	1.50009	0.8308	1.29971	ASS1	13.2473	13.4393	11.7941	11.9058	14.2059	13.4991
ASTE1	4.56168	4.00956	4.00421	3.40897	3.55561	3.16191	ASTE1	5.07254	4.66269	4.47947	4.36677	4.72935	4.7885	ASTE1	4.12103	3.66334	3.91763	3.76102	3.4127	3.6669	ASTE1	4.38094	4.4851	4.97904	4.11823	4.22546	4.30628
ASTILCS	0.141662	0	0.228323	0	0.167875	0.162544	ASTILCS	0.034751	0	0	0	0	0
ASTILCS-2	0	0	0	0	0	0	ASTILCS-2	0	0	0	0	0	0
ASTILCS-3	0	0	0.039253	0	0	0	ASTILCS-3	0	0	0	0	0	0
ASTL	0	0	0	0	0	0	ASTL	0	0	0	0	0	0	ASTL	0	0	0	0	0	0	ASTL	0	0.042217	0	0	0	0
ASTN1	0	0	0	0	0	0	ASTN1	0.006628	0.012861	0.023209	0	0.056612	0.012457	ASTN1	0	0	0	0	0	0	ASTN1	0	0	0	0	0	0
ASTN2	6.33705	6.5098	7.18678	6.68335	6.48585	6.02681	ASTN2	10.0438	9.67935	7.86747	8.06004	8.84056	6.88402	ASTN2	0.10325	0.076728	0.027117	0.071774	0.096467	0.090926	ASTN2	0.019744	0.023237	0.01018	0.037006	0.039865	0.009574
ASTN2-AS1	0	0.029186	0	0	0	0	ASTN2-AS1	0	0	0	0	0	0
ASXL1	34.4251	33.4931	31.9229	34.6862	33.1805	32.3214	ASXL1	27.3244	25.5228	27.2157	25.5037	25.8834	25.7389	ASXL1	31.7641	28.2	28.9603	29.7905	29.896	29.6607	ASXL1	25.8236	24.8651	25.3712	23.3614	27.8143	28.8341
ASXL2	12.0165	11.1028	10.1895	12.0294	11.0206	10.6465	ASXL2	12.5043	11.7091	12.3824	11.5083	12.2658	10.4988	ASXL2	16.0185	14.4488	16.2496	15.7887	16.0714	16.1353	ASXL2	19.531	18.5644	21.2492	16.732	20.375	22.4601
ASXL3	0	0	0	0.006979	0.003328	0	ASXL3	0.005576	0.005411	0	0.004661	0	0.002613	ASXL3	0	0	0	0	0	0	ASXL3	0	0	0	0	0	0
ASZ1	0.076384	0	0	0	0	0	ASZ1	0	0	0	0	0	0	ASZ1	0	0	0	0	0	0	ASZ1	0.029596	0	0.030388	0	0	0
ATAD1	66.1221	64.2178	60.1107	64.5787	63.8717	57.7289	ATAD1	42.3994	46.235	44.2576	46.4807	44.5011	45.9054	ATAD1	48.6128	44.2729	46.2413	44.6919	45.7433	46.016	ATAD1	64.6978	63.2975	63.8047	61.2339	65.3762	65.5965
ATAD2	50.7735	51.1459	50.4895	46.0772	45.3694	47.8215	ATAD2	28.6918	26.4889	29.5727	27.0118	26.8347	28.4646	ATAD2	94.041	88.9136	88.5299	85.2487	91.6674	90.6309	ATAD2	74.1553	73.0767	84.3891	68.1562	81.5605	83.1531
ATAD2B	5.38402	4.9392	4.58674	5.93924	5.3721	5.39965	ATAD2B	2.56263	3.1642	3.22519	2.87804	3.469	2.60697	ATAD2B	8.39973	7.14937	8.26151	7.84512	7.79837	7.93447	ATAD2B	2.68011	2.12501	2.97464	2.16786	3.13597	3.21512
ATAD3A	35.7537	37.8893	36.9908	31.5677	34.8557	34.2331	ATAD3A	69.5659	65.5125	68.6365	58.9319	63.2758	65.3362								LOC103295361	46.9652	43.3902	44.8033	41.1371	44.7567	48.9842
ATAD3B	1.14528	0.643184	0.734973	0.752616	0.867003	0.689939	ATAD3B	18.3738	14.9359	14.3905	14.6225	15.4654	13.7272	LOC102882255	43.3285	43.1247	48.2019	45.0568	43.135	44.2853
ATAD3C	0.086804	0	0.04269	0.031662	0.067628	0.027891	ATAD3C	1.43629	1.36943	1.46631	1.5156	1.42668	1.02735
ATAD5	5.05566	4.57719	4.62738	4.37633	5.49124	4.95209	ATAD5	2.04465	1.9809	1.85777	1.62346	1.86088	1.52607	ATAD5	18.433	16.6458	17.0133	16.7641	17.4034	17.3257	ATAD5	6.64666	6.16724	8.34567	5.19282	7.51606	8.28259
ATAT1	4.68906	5.4683	5.03526	3.68848	4.69819	5.51822	ATAT1	4.95047	4.79051	5.18319	5.00574	4.83971	3.72074	ATAT1	16.3773	16.0997	15.3927	12.1241	15.2608	15.162	ATAT1	18.6431	19.3917	17.228	18.9903	18.8659	18.8472
ATCAY	0	0.041309	0.042246	0.101137	0.016504	0.025798	ATCAY	0.016773	0.03668	0.025567	0.03347	0.042746	0.031389	ATCAY	0	0.082472	0	0	0	0	ATCAY	0	0	0.041989	0	0	0
ATE1	41.3392	40.4956	39.4433	41.981	36.0279	38.9209	ATE1	24.5201	22.2306	20.6631	21.54	20.5299	19.7003	ATE1	31.0034	30.3948	29.42	29.1824	29.0509	30.504	ATE1	26.6589	25.8234	27.1746	24.561	26.3058	26.3278
ATE1-AS1	0	0.119973	0.06618	0.142026	0.143758	0	ATE1-AS1	0.354724	0.513959	0.274585	0.493801	0.188631	0.553396
ATF1	27.833	29.494	29.9293	28.1702	27.1567	24.9515	ATF1	20.7037	19.22	21.3932	20.5774	21.1142	18.3282	ATF1	50.4945	49.032	52.084	49.3632	51.9732	54.5911	ATF1	35.3718	33.0962	33.0981	33.5891	32.4656	34.3982
ATF2	24.2407	21.4392	20.9849	23.5475	22.6082	20.8181	ATF2	28.0006	26.2936	27.3633	27.2311	26.4186	25.8509	ATF2	38.1752	35.3361	36.7493	34.2436	37.3836	37.0583	ATF2	22.3866	22.6969	24.9861	21.3288	23.5261	23.6687
ATF3	4.4565	4.86382	4.30514	5.94529	4.80168	4.04449	ATF3	4.4959	3.80948	3.86017	4.36361	4.45214	4.21248	ATF3	8.36956	9.03205	8.25915	8.83409	7.77646	7.76322	ATF3	14.7293	16.3281	15.5179	14.3839	16.3694	14.9105
ATF4	551.898	575.874	540.123	515.161	518.59	488.788	ATF4	425.764	432.105	434.264	466.783	461.896	467.716	ATF4	839.061	802.592	842.481	852.186	839.533	845.317	ATF4	554.427	528.797	574.423	501.923	571.158	595.376
ATF5	40.323	38.8282	44.3521	37.8053	41.1748	43.3626	ATF5	97.0253	92.4468	100.603	89.4042	91.1844	92.9073	ATF5	26.0894	26.8841	30.1347	29.2414	27.1857	27.8845	ATF5	11.5162	11.981	10.8298	10.5956	10.4557	10.7573
ATF6	28.0278	26.6971	24.2368	28.5007	28.364	29.9832	ATF6	36.0984	36.2222	38.0788	35.1587	36.7074	35.8407	ATF6	49.0285	49.3203	50.6081	46.5895	47.6753	45.3464	ATF6	26.0201	27.3735	26.5908	25.2725	25.3929	28.5059
ATF6-DT	0.069899	0	0.049977	0.071199	0.078278	0.034593	ATF6-DT	0.139191	0.05741	0.058103	0.047602	0.070769	0.069834
ATF6B	43.7409	43.3897	41.6688	44.4649	47.9408	44.6429	ATF6B	67.1629	64.5097	64.0981	65.6827	65.6361	62.5583	ATF6B	35.5249	37.0261	39.7386	35.9198	35.1516	35.8989	ATF6B	57.3592	54.1996	58.9276	50.9511	56.033	57.7234
ATF7	31.9798	29.7784	31.1966	35.5533	31.0474	32.6612	ATF7	26.5495	25.3885	28.0374	25.6788	26.1684	26.0931	ATF7	15.2003	13.9393	14.3687	14.1162	15.1759	15.1278	LOC103285352	13.4212	14.4307	15.4007	14.0623	15.7458	17.5297
ATF7-NPFF	0	0.246119	0	0	0.49666	0.18694	ATF7-NPFF	0.471882	0.412105	0.596563	0	0	0.158527
ATF7IP	7.57428	6.68651	6.39187	7.09286	6.18177	7.53063	ATF7IP	18.2985	16.2388	15.9148	16.7732	16.1884	15.1465	ATF7IP	6.72645	6.35709	6.5892	6.17674	6.43619	6.28789	ATF7IP	16.0304	15.9596	16.7796	15.1349	17.1312	18.5598
ATF7IP2	1.69493	1.5208	1.32512	1.72924	1.75689	1.78842	ATF7IP2	1.48399	1.72802	1.55894	1.5677	1.5379	1.54911	ATF7IP2	0.028786	0.048934	0.060155	0.06321	0.047413	0.028808	ATF7IP2	0	0	0.014721	0	0	0
ATG10	8.4466	8.84287	8.6442	8.41272	9.56742	8.99617	ATG10	5.49686	5.49438	5.77905	5.70724	5.94302	5.38104	ATG10	4.21686	4.18426	4.24158	4.88647	4.63413	5.38406	ATG10	16.6983	20.0446	20.4528	20.1051	23.3948	20.8893
ATG101	85.3891	90.6026	91.7011	86.0521	79.3992	84.834	ATG101	74.3036	74.0492	70.4667	70.6222	72.2924	75.3551	ATG101	41.6119	40.5428	40.3309	41.2899	40.359	41.2931	ATG101	59.5202	55.9188	57.7005	52.0448	51.8287	52.8497
ATG12	21.3901	22.0766	22.5952	21.9479	20.7692	20.9474	ATG12	14.1852	13.7226	15.0587	14.8513	13.8366	14.5882	ATG12	39.0108	36.518	38.0567	36.9991	37.5903	37.8758	ATG12	53.8114	50.6121	60.9619	53.7625	59.4839	55.246
ATG13	43.0641	43.1195	41.0063	41.3839	43.4161	43.1286	ATG13	30.5841	31.1456	30.0519	30.08	29.9098	30.3284	ATG13	16.4063	16.3571	16.1167	15.6046	15.3302	15.7777	ATG13	16.3015	16.2266	15.2438	14.8526	16.9155	16.1628
ATG14	8.83601	8.89776	9.17363	8.73405	9.95447	9.17149	ATG14	7.81125	7.57098	7.83568	8.222	7.88806	7.43672	ATG14	5.58534	6.14877	5.04666	5.13619	6.44017	6.35326	ATG14	8.35364	7.86341	9.12119	7.28558	8.48382	8.51613
ATG16L1	26.7367	25.9584	25.7457	25.4644	25.0783	24.5983	ATG16L1	31.2464	30.0564	30.9236	31.0912	29.0368	30.1773	ATG16L1	14.2476	13.8177	14.0892	13.4648	13.4292	14.1465	ATG16L1	17.0672	18.0192	18.7589	14.9558	18.1745	19.245
ATG16L2	1.6748	1.58628	1.15188	1.70626	1.96695	1.4343	ATG16L2	5.48453	4.36036	4.61733	6.59355	5.17193	4.48397	ATG16L2	0.979269	0.695752	0.827262	0.509935	0.922088	0.847013	ATG16L2	8.5196	8.93992	9.7153	7.80364	8.80161	9.00762
ATG2A	13.0261	12.4265	11.8581	12.9031	12.5528	13.6211	ATG2A	23.4932	21.7994	22.0428	21.2209	20.6232	21.485	ATG2A	21.1022	19.2075	19.817	18.4221	20.3078	19.8768	ATG2A	22.2252	19.8351	21.1961	19.2216	22.9809	23.2879
ATG2B	6.61555	6.20041	5.74371	6.33328	6.28631	5.87142	ATG2B	7.16211	6.87642	7.39129	6.88954	7.19375	6.19912	ATG2B	13.3842	11.1672	11.4486	11.5475	11.3893	12.6139	ATG2B	8.17131	8.01068	8.53045	8.12916	8.55467	8.83431
ATG3	64.6598	66.6591	64.3022	61.2932	64.8476	63.5945	ATG3	73.2962	72.133	72.8802	74.5373	67.869	69.5349	ATG3	68.4197	66.128	68.1728	65.6053	66.0401	67.2447	ATG3	67.8335	66.3008	70.9303	66.4938	71.6903	70.5766
ATG4A	9.70647	9.43353	8.94094	7.56252	9.18464	10.1568	ATG4A	10.9752	9.42943	9.57495	11.037	10.374	10.7771	ATG4A	6.52351	6.57314	7.71502	7.61025	7.23363	7.71834	ATG4A	10.7374	9.28293	10.6131	8.94495	10.2686	10.9231
ATG4B	23.0023	21.2583	22.8507	23.4943	21.5871	22.0641	ATG4B	31.0995	28.1561	28.3887	28.4495	27.5281	27.3236	ATG4B	33.6973	34.5854	33.7585	34.0485	33.9477	32.1453	ATG4B	21.855	21.727	20.8373	20.8087	21.4255	21.3591
ATG4C	10.8307	9.67453	9.28803	9.44658	8.67802	9.33036	ATG4C	7.07198	7.63299	6.13227	7.76573	6.73057	6.75618	ATG4C	15.3317	15.2618	15.7004	15.4663	15.9429	15.4349	ATG4C	13.8747	15.1322	15.9183	13.3761	13.8941	15.1821
ATG4D	18.4387	19.5106	19.6632	17.078	16.0711	15.5384	ATG4D	25.4916	27.4664	24.7316	26.0325	24.7449	24.3818	ATG4D	23.6072	24.545	26.2432	22.921	22.3843	23.8088	ATG4D	37.8963	37.2693	36.2902	37.1857	36.5829	32.3457
ATG5	30.5021	28.9622	26.516	26.235	27.8061	28.1857	ATG5	32.4936	35.9083	34.7471	33.6399	35.6991	33.7707	ATG5	26.7967	24.8471	25.4196	27.1631	23.6172	23.7231	ATG5	29.4227	29.6557	31.4243	28.1493	28.418	27.8949
ATG7	16.0235	18.4649	17.3558	16.7477	17.9544	17.302	ATG7	23.2053	22.8274	21.5336	23.2413	23.3843	23.0677	ATG7	6.59095	7.15655	6.16608	7.94058	7.96313	7.3977	ATG7	13.3469	13.7916	13.1771	13.8091	13.2804	12.8568
ATG9A	50.0707	46.4887	47.229	45.6822	41.6292	44.2406	ATG9A	60.1362	54.031	58.3271	52.2173	50.1163	52.9712	ATG9A	33.145	33.4992	33.53	32.4621	31.9351	32.6113	ATG9A	29.8135	29.5771	29.4883	28.4564	30.6055	30.8082
ATG9B	0.107188	0.021637	0.024415	0	0.016839	0.060757	ATG9B	0	0.060969	0	0	0.022369	0.036761	ATG9B	0.581453	0.611051	0.723617	0.637617	0.68841	0.576113	ATG9B	0.199851	0.372017	0.291524	0.207983	0.358046	0.322303
ATIC	163.229	161.019	154.548	161.698	157.919	159.858	ATIC	124.9	124.75	125.937	121.965	121.809	124.038	ATIC	101.246	98.7836	103.246	101.843	103.566	99.2245	ATIC	74.3553	72.443	70.0039	68.0561	68.9746	70.4265
ATL1	2.08394	2.03613	2.08673	1.50412	1.97376	2.52642	ATL1	4.52591	4.28837	5.41401	5.0472	4.25015	5.08462	ATL1	0.294054	0.245241	0.399157	0.41085	0.159832	0.294677	ATL1	1.51883	1.94602	1.72735	1.66597	1.48177	1.6666
ATL2	33.9309	33.8733	34.0922	32.6754	30.0093	31.0523	ATL2	16.6372	15.6836	15.9343	15.5192	15.5296	14.9227	ATL2	31.0221	30.6705	30.2652	31.1723	31.0939	30.5879	ATL2	18.9273	18.1828	18.0778	16.0903	17.3059	18.2155
ATL3	25.4198	24.8158	25.4485	24.7727	24.6284	23.8205	ATL3	23.5115	24.1144	26.9758	23.4711	24.3355	20.6494	ATL3	20.463	22.2968	22.1797	22.1705	21.8332	21.4997	ATL3	126.737	134.374	131.043	123.56	131.864	131.046
ATM	3.71718	6.64793	4.50813	4.23844	5.79056	4.2159	ATM	8.09273	11.0099	11.2802	10.3095	8.12201	9.50807	ATM	10.6045	9.38803	9.44372	8.77275	10.581	10.4556	ATM	10.967	11.7595	9.97388	11.1876	10.9869	13.0773
ATMIN	39.603	38.7151	37.7785	35.8815	35.4136	36.8562	ATMIN	33.1512	33.0578	34.4677	31.8064	31.8539	31.8002	ATMIN	16.6717	15.5765	15.7981	14.808	14.7723	15.8372	ATMIN	18.8004	18.1132	20.1356	17.6375	18.411	20.4589
ATN1	75.6895	71.5203	72.7939	75.9272	69.5171	72.0033	ATN1	85.8004	77.9776	85.016	82.9031	77.5479	75.7302	ATN1	57.5158	61.6705	61.3907	59.4246	61.2144	62.7397	ATN1	105.913	101.492	110.622	92.8035	110.818	116.754
ATOH1	0	0	0	0	0	0	ATOH1	0	0	0	0	0	0	ATOH1	0	0	0	0	0	0	ATOH1	0	0	0	0	0	0
ATOH7	0.046476	0.137503	0.152413	0.081793	0	0.119997	ATOH7	0.102631	0.132455	0	0	0.109349	0.160406	ATOH7	0	0.148878	0	0	0	0	ATOH7	0	0	0	0	0	0
ATOH8	6.3785	4.67629	5.33332	4.51713	4.79467	5.45722	ATOH8	0	0.062436	0.01964	0.019372	0	0	ATOH8	13.8527	13.5484	14.0752	11.8727	13.2917	13.7684	ATOH8	0.045978	0	0.070914	0.057388	0.092516	0.044397
ATOSA	10.6278	10.1294	9.78198	9.51902	11.14	10.1545	ATOSA	10.2277	10.9435	11.4544	12.1912	10.3899	10.78
ATOSB	9.75814	8.91602	9.29075	9.11123	8.72329	10.1403	ATOSB	27.7326	27.3367	29.1687	26.8476	26.5193	25.0503
ATOX1	197.913	204.194	200.883	184.691	194.796	212.457	ATOX1	158.21	153.565	166.318	159.35	151.935	158.155	ATOX1	282.863	302.966	271.181	274.197	289.127	265.411	ATOX1	292.766	309.668	278.456	265.193	302.788	281.984
ATOX1-AS1	0	0	0	0	0	0	ATOX1-AS1	0	0	0.074727	0	0	0.06025
ATP10A	12.1538	11.7044	12.0887	30.898	28.3349	29.841	ATP10A	29.5386	26.7245	26.6518	36.6302	34.9775	36.4589	ATP10A	24.3616	23.5935	25.1752	24.3016	24.6881	24.8114	ATP10A	0	0	0	0	0.025115	0.018095
ATP10A-DT	0	0	0	0	0	0	ATP10A-DT	0	0	0	0	0	0
ATP10B	0.019295	0.014275	0	0.018279	0.008604	0.033974	ATP10B	0.015648	0	0	0.022278	0.018752	0.021155	ATP10B	0	0.010646	0	0.013946	0	0.012618	ATP10B	0.421645	0.359739	0.597774	0.368779	0.680951	0.511022
ATP10D	2.56054	2.24057	2.44875	4.58176	4.51558	4.52236	ATP10D	20.001	20.2372	20.4283	19.7214	20.694	19.1818	ATP10D	7.50618	7.0234	6.61437	7.38867	6.57609	7.22994	ATP10D	9.53725	8.76813	9.88	7.8575	9.41096	9.59888
ATP11A	11.3835	9.53761	9.65612	10.0165	10.567	10.1971	ATP11A	97.3246	86.3419	96.9491	92.752	94.3056	83.0254	ATP11A	53.6339	48.951	48.2339	48.7265	50.9882	52.2218	ATP11A	29.9877	27.9151	30.7255	26.6937	31.4493	36.1718
ATP11A-AS1	0	0	0	0	0	0	ATP11A-AS1	0	0	0	0	0	0
ATP11AUN	0	0	0	0	0	0	ATP11AUN	0	0	0	0	0	0
ATP11B	13.0144	12.2937	11.7832	12.7658	12.1378	12.3319	ATP11B	24.7526	25.0255	25.1644	24.1426	24.6243	25.6443	ATP11B	40.3037	38.1291	40.1233	37.1213	41.5366	41.4084	ATP11B	44.0998	42.7515	46.5512	37.8762	45.8297	47.2788
ATP11B-DT	0	0	0.053478	0.03986	0.025847	0.077149	ATP11B-DT	0	0	0	0	0	0
ATP11C	9.08024	8.38978	7.85399	9.65871	9.97562	10.1311	ATP11C	14.9389	14.1786	15.6382	13.3696	13.9558	13.3653	ATP11C	10.3536	9.77869	10.4756	9.84722	10.7732	9.93177	ATP11C	5.52312	5.91769	5.96578	5.68097	6.55068	6.05461
ATP12A	0	0	0	0	0	0	ATP12A	0	0	0	0	0	0	ATP12A	0	0	0.010509	0	0	0	ATP12A	0.009217	0	0.019013	0.046072	0.024819	0.008941
ATP13A1	37.6548	36.3481	36.1301	38.241	38.1587	38.802	ATP13A1	46.065	42.4539	42.7962	43.833	42.7156	40.6981	ATP13A1	41.3639	41.9358	42.6354	40.0218	40.4362	39.4911	ATP13A1	39.3597	39.425	38.2005	36.5366	37.0182	40.81
ATP13A2	32.2183	31.8716	31.4504	30.9479	29.7076	30.3002	ATP13A2	51.2923	48.0647	49.8878	47.0961	47.2789	46.5044	ATP13A2	26.5627	26.1888	25.963	23.6804	24.473	23.7688	ATP13A2	51.9387	48.7144	53.6606	45.1205	51.7768	53.2394
ATP13A3	39.1525	35.6295	35.9239	32.8393	31.93	34.2806	ATP13A3	48.1052	48.0394	49.3434	46.0056	50.4092	42.6133	ATP13A3	52.5215	50.9467	51.8962	51.0095	51.9758	52.4226	ATP13A3	62.8237	59.2909	66.3631	55.0593	66.5759	68.4861
ATP13A3-DT	0	0.097817	0.054068	0	0	0.056794	ATP13A3-DT	0.338841	0.093598	0.337586	0.337418	0.257606	0.31742
ATP13A4	0	0.06417	0.020465	0.055843	0.037548	0.021456	ATP13A4	0.018477	0.014488	0	0.08753	0.032907	0.045209	ATP13A4	0.014179	0.060216	0.014889	0.047263	0.011768	0.028529	ATP13A4	0.019753	0	0	0	0	0
ATP13A4-AS1	0	0	0	0	0	0	ATP13A4-AS1	0	0	0	0.089081	0	0
ATP13A5	0	0	0	0	0	0	ATP13A5	0	0.015684	0.024956	0	0	0	ATP13A5	0.151878	0.116103	0.095657	0.101165	0.138579	0.106913	ATP13A5	0	0	0.011782	0	0	0
ATP13A5-AS1	0	0	0	0	0	0	ATP13A5-AS1	0.098989	0.095301	0	0	0.314932	0
ATP1A1	200.398	192.186	192.785	198.26	183.223	202.915	ATP1A1	1520.79	1400.47	1390.72	1449.31	1363.72	1457.31
ATP1A1-AS1	3.11137	1.79363	2.3397	2.24605	1.95066	2.7288	ATP1A1-AS1	3.07826	3.62331	5.31075	3.05035	5.81813	3.48365
ATP1A2	0	0.03362	0.040552	0.064401	0.012944	0.062863	ATP1A2	0	0	0.010237	0.045371	0	0.02027	ATP1A1	918.349	873.953	853.559	818.125	825.358	863.09	LOC103297531	0	0	0.012585	0	0	0
ATP1A2	0	0.03362	0.040552	0.064401	0.012944	0.062863	ATP1A2	0	0	0.010237	0.045371	0	0.02027	ATP1A3	0.080286	0.027279	0	0.017813	0.093192	0.048428	LOC103297531	0	0	0.012585	0	0	0
ATP1A2	0	0.03362	0.040552	0.064401	0.012944	0.062863	ATP1A2	0	0	0.010237	0.045371	0	0.02027	ATP1A4	0	0	0	0	0	0	LOC103297531	0	0	0.012585	0	0	0
ATP1A2	0	0.03362	0.040552	0.064401	0.012944	0.062863	ATP1A2	0	0	0.010237	0.045371	0	0.02027	LOC102885125	0	0	0.016328	0	0.012902	0	LOC103297531	0	0	0.012585	0	0	0
ATP1A3	5.59341	5.85476	5.69184	5.9662	5.4908	5.24326	ATP1A3	0.057008	0.027636	0	0.059887	0.045621	0.013385								ATP1A1	1003.09	993.156	993.016	954.016	984.267	1028.51
ATP1A4	0	0	0	0	0	0	ATP1A4	0	0	0	0	0	0								ATP1A4	0	0	0	0.01644	0.0177	0.012749
ATP1B1	678.284	533.284	670.261	630.884	549.085	679.588	ATP1B1	490.762	496.788	485.767	523.81	495.978	496.628	ATP1B1	391.039	385.151	344.481	337.168	365.106	362.8	ATP1B1	66.1947	65.3631	64.6565	61.6086	61.1836	65.0535
ATP1B2	0.124137	0.072624	0.225844	0.124305	0.258579	0.247997	ATP1B2	0.024852	0	0	0	0.030245	0.03879	ATP1B2	1.12479	1.47531	1.17888	1.09128	1.30632	1.24816	ATP1B2	1.54471	1.56247	1.44868	1.07416	1.36517	1.28535
ATP1B3	219.695	190.043	211.243	202.727	183.395	196.757	ATP1B3	153.961	149.621	152.429	138.701	138.163	148.855	ATP1B3	174.724	180.885	176.052	178.823	178.506	173.768	ATP1B3	358.262	349.87	362.338	327.465	372.651	367.534
ATP1B4	0	0.026183	0.011674	0	0.024236	0	ATP1B4	0.026979	0	0.05013	0	0	0	ATP1B4	0	0	0	0	0.033419	0	ATP1B4	0	0.118627	0.051837	0	0	0
ATP23	3.65388	3.57637	3.76255	3.05758	3.01892	3.41317	ATP23	2.63243	2.4389	2.58135	2.48877	2.38402	2.48696	ATP23	14.094	12.9177	14.6028	15.7609	14.8049	14.8054	ATP23	20.3022	19.6618	19.21	20.2229	21.632	19.3216
ATP2A1	0.398093	0.209341	0.310321	0.134085	0.317322	0.324479	ATP2A1	0.046609	0.090372	0.144938	0.043515	0.132609	0.116719	ATP2A1	0.026716	0.02269	0.070154	0.089111	0.044365	0.06721	ATP2A1	11.4781	10.598	10.5553	10.2087	10.7332	10.8001
ATP2A1-AS1	10.7064	14.374	12.7038	10.7347	14.545	13.1766	ATP2A1-AS1	2.64289	2.81245	2.7581	2.01782	2.61322	2.66581
ATP2A2	316.492	333.484	301.456	315.045	324.783	309.484	ATP2A2	112.8	111.614	115.286	110.978	117.456	106.258	ATP2A2	94.1413	87.1685	93.5677	95.0703	94.7551	94.0848	ATP2A2	113.67	115.161	113.696	108.396	118.299	115.818
ATP2A3	9.04778	8.70796	8.858	8.16187	9.26052	10.4237	ATP2A3	0.030638	0.079807	0.069171	0.016473	0.110749	0.088346	ATP2A3	0.054613	0.069576	0.01434	0	0.034004	0.068688	ATP2A3	0.053466	0.125834	0.231525	0.146965	0.100734	0.15551
ATP2B1	78.3023	76.0859	74.2927	71.6234	69.9014	71.4032	ATP2B1	34.7475	34.0165	35.29	34.0779	34.377	34.1097	ATP2B1	23.5974	21.4778	22.6741	21.6506	22.6724	23.545	ATP2B1	18.8327	18.4246	19.1956	17.7459	19.2902	19.6206
ATP2B1-AS1	0.898504	1.0265	0.869777	0.778098	0.961392	0.779268	ATP2B1-AS1	0.620434	0.601448	0.666326	0.571564	0.348374	0.41395
ATP2B2	0.01433	0.010602	0.015806	0.012684	0	0.006193	ATP2B2	0	0	0	0	0	0	ATP2B2	0	0	0	0	0	0	ATP2B2	0	0.015662	0	0.016632	0.017906	0
ATP2B2-IT2	0	0	0	0	0	0	ATP2B2-IT2	0	0	0	0	0	0
ATP2B3	0.033127	0.031124	0.04587	0.029282	0.018758	0.013815	ATP2B3	0.012298	0	0.014345	0	0	0	ATP2B3	1.89559	1.75378	1.54075	1.43534	1.48802	1.68891	ATP2B3	0.323545	0.262394	0.209738	0.356031	0.310229	0.264147
ATP2B4	5.32434	5.36917	4.83306	5.06282	4.98286	5.4006	ATP2B4	18.3072	16.849	18.1751	16.231	17.9733	15.1409	ATP2B4	33.3761	31.069	30.0812	31.5466	32.394	33.0063	ATP2B4	39.8585	37.1543	38.8316	35.6449	39.9391	42.4253
ATP2C1	44.8116	42.3657	41.2919	43.204	42.5759	43.638	ATP2C1	128.393	129.83	125.887	123.333	125.022	123.794	ATP2C1	50.0238	46.9219	48.1261	46.673	46.8374	50.1719	ATP2C1	66.229	64.9586	66.8088	61.6463	66.4097	67.5243
ATP2C2	0.452343	0.397606	0.124104	0.196545	0.328885	0.234768	ATP2C2	0	0.032327	0	0.046198	0.037799	0.01549	ATP2C2	0	0	0	0	0	0	ATP2C2	0	0.052261	0.030518	0.037003	0	0.014342
ATP2C2-AS1	0.132153	0.130349	0.054361	0.097262	0.117721	0.114039	ATP2C2-AS1	0.538798	0.395689	0.304606	0.411646	0.296118	0.613259
ATP4A	0	0.012961	0	0	0	0	ATP4A	0.013004	0	0	0	0	0	ATP4A	0	0	0	0	0	0	ATP4A	0.8295	0.742829	0.893204	0.773334	0.666164	0.731798
ATP4B	0	0	0	0	0	0	ATP4B	0	0	0	0	0	0	ATP4B	0	0	0	0	0	0	ATP4B	0	0	0	0.080638	0	0
ATP5F1A	135.609	139.78	139.832	132.034	136.639	133.869	ATP5F1A	203.796	203.53	203.531	200.783	202.678	202.213	ATP5F1A	946.863	932.801	945.355	928.436	913.167	924.547	ATP5F1A	660.286	691.706	667.122	633.756	650.881	633.968
ATP5F1B	1058.38	1087	1059.18	1031.13	1028.77	1008.75	ATP5F1B	973.605	997.121	966.4	978.772	967.676	971.625	ATP5F1B	1127.46	1151.46	1187.98	1159.62	1170.96	1161.69	ATP5F1B	892.575	913.77	862.229	866.172	863.707	842.366
ATP5F1C	380.646	379.234	381.209	348.441	380.6	381.661	ATP5F1C	334.212	348.066	344.223	338.512	334.23	354.61	ATP5F1C	384.36	389.667	379.38	398.337	403.058	386.848	ATP5F1C	364.109	358.951	361.403	339.852	356.94	346.46
ATP5F1D	191.797	197.592	193.273	192.046	181.31	190.917	ATP5F1D	341.103	336.425	335.873	319.508	331.525	324.722	ATP5F1D	500.992	600.477	577.203	550.491	568.523	550.101	ATP5F1D	440.873	450.352	434.285	445.009	427.534	416.035
ATP5F1E	47.9769	49.9431	48.3438	46.3619	46.2858	48.0436	ATP5F1E	51.8713	52.0666	52.4977	54.3531	50.5565	53.3966	ATP5F1E	1042.32	1124.81	1200.83	1259.4	1234.4	1186.21	ATP5F1E	731.464	745.247	699.008	672.848	692.629	651.137
ATP5IF1	219.49	233.84	227.161	209.141	224.12	215.86	ATP5IF1	420.7	429.434	408.724	442.987	445.916	445.568	ATP5IF1	645.624	645.685	662.63	696.791	683.027	649.894	ATP5IF1	698.986	723.29	697.362	730.594	717.906	735.067
ATP5IF1	219.49	233.84	227.161	209.141	224.12	215.86	ATP5IF1	420.7	429.434	408.724	442.987	445.916	445.568	ATP5IF1	645.624	645.685	662.63	696.791	683.027	649.894	LOC103302431	0	0	0	0	0	0
ATP5MC1	519.254	544.796	526.571	472.367	508.745	498.811	ATP5MC1	187.278	196.101	204.799	197.72	204.7	184.945	ATP5MC1	321.289	337.313	313.061	301.503	310.599	311.886	ATP5MC1	546.615	531.601	497.027	507.204	502.871	460.522
ATP5MC2	798.292	852.176	807.196	804.068	822.574	764.486	ATP5MC2	539.45	552.944	554.392	559.441	565.891	559.941	ATP5MC2	742.457	760.783	766.095	752.848	736.487	772.508	LOC103293182	0	0.19675	0	0	0	0.157138
ATP5MC3	112.325	117.409	116.391	109.823	111.536	115.355	ATP5MC3	148.662	151.458	154.74	152.863	150.79	152.653	ATP5MC3	724.278	780.371	791.565	790.787	753.458	740.668	ATP5MC3	770.424	792.731	772.319	785.099	774.271	750.197
ATP5ME	486.674	522.247	525.132	473.355	550.364	484.744	ATP5ME	662.481	673.699	636.456	676.098	690.815	673.424	ATP5ME	0	0	0	0	0	0	ATP5ME	557.724	588.302	578.916	540.987	546.323	560.139
ATP5MF	998.766	980.516	1051	966.085	976.606	994.302	ATP5MF	649.796	645.264	672.506	639.609	651.663	637.204	ATP5MF	473.53	460.084	475.657	510.052	499.746	497.792	ATP5MF	480.461	501.666	466.14	428.951	479.891	470.554
ATP5MF	998.766	980.516	1051	966.085	976.606	994.302	ATP5MF	649.796	645.264	672.506	639.609	651.663	637.204	ATP5MF	473.53	460.084	475.657	510.052	499.746	497.792	LOC103284951	0	0	0	0	0	0
ATP5MF-PTCD1	0	0	0	0	0	0	ATP5MF-PTCD1	0.119867	0	0.178851	0	0	0								PTCD1	16.9192	16.139	17.4507	13.994	17.5794	17.0703
ATP5MG	208.926	213.468	215.756	200.38	201.332	211.663	ATP5MG	265.305	270.013	265.148	271.648	275.757	286.762	ATP5MG	437.108	452.752	446.949	441.084	450.936	454.147	ATP5MG	395.869	393.701	380.417	384.805	385.187	359.413
ATP5MGL	0.206229	0.076281	0	0.089548	0	0	ATP5MGL	0	0.145947	0	0	0.159386	0
ATP5MJ	284.183	287.233	307.301	277.938	290.858	276.383	ATP5MJ	169.117	180.318	176.874	181.39	175.704	191.378
ATP5MK	736.87	721.999	695.551	688.096	704.649	695.778	ATP5MK	641.303	624.803	616.8	603.365	590.98	646.628
ATP5PB	107.22	109.04	107.074	96.6976	101.774	97.9923	ATP5PB	142.909	144.126	144.568	139.895	141.153	142.726	ATP5PB	406.791	424.972	414.607	425.662	414.199	428.564	ATP5PB	347.737	350.726	351.744	333.519	352.13	343.985
ATP5PD	644.208	669.316	665.727	600.405	662.755	625.108	ATP5PD	541.18	554.403	561.183	573.922	565.204	566.388	ATP5PD	465.059	482.222	487.098	491.687	478.594	491.311	ATP5PD	277.844	288.437	271.249	271.946	264.737	260.241
ATP5PD	644.208	669.316	665.727	600.405	662.755	625.108	ATP5PD	541.18	554.403	561.183	573.922	565.204	566.388	ATP5PD	465.059	482.222	487.098	491.687	478.594	491.311	LOC103294848	88.5752	80.7396	88.6964	84.163	82.3872	80.0411
ATP5PF	301.56	305.165	305.965	299.556	307.205	291.617	ATP5PF	336.813	347.714	325.587	347.839	339.577	347.385	ATP5PF	462.924	486.094	488.233	507.365	493.471	481.904	ATP5PF	383.419	371.075	379.432	364.804	365.193	339.341
ATP5PO	270.508	279.533	285.584	257.47	273.81	265.815	ATP5PO	630.738	635.216	612.82	613.84	569.393	665.38	ATP5PO	921.33	939.238	943.465	927.232	903.681	934.891
ATP6AP1	151.483	142.526	142.154	141.695	135.399	140.968	ATP6AP1	177.668	171.615	162.688	175.189	161.147	168.242	ATP6AP1	160.922	169.154	164.124	149.406	161.899	153.041	ATP6AP1	78.9848	76.9426	81.1	70.725	76.3463	77.1329
ATP6AP1-DT	13.3818	12.4467	17.3673	12.5065	13.6375	13.6906	ATP6AP1-DT	9.02873	9.30702	11.6766	11.4459	9.45526	10.0252
ATP6AP1L	0.33573	0.693879	0.763393	0.521696	0.937495	0.51355	ATP6AP1L	1.34094	1.47619	1.10097	1.10948	1.34517	1.08297	ATP6AP1L	1.46017	1.13507	1.02296	1.146	1.02426	1.19672	LOC103305357	0.718294	1.91975	0.996134	0.511126	1.29811	0.981743
ATP6AP2	145.686	144.824	142.278	142.208	145.948	152.095	ATP6AP2	113.026	111.847	107.029	110.395	112.53	112.588	ATP6AP2	221.36	225.929	218.564	201.935	224.122	224.089	ATP6AP2	199.34	197.891	202.02	176.088	197.24	183.891
ATP6V0A1	42.9158	40.0154	37.8165	37.6315	36.4985	36.1431	ATP6V0A1	42.8996	42.0858	43.1423	42.1378	43.3629	40.9263	ATP6V0A1	25.6713	23.5138	23.0406	24.1115	24.8685	24.2084	ATP6V0A1	50.418	49.1592	51.4036	47.1859	49.987	50.0266
ATP6V0A2	12.7536	12.2868	12.2936	12.1615	11.9324	11.8068	ATP6V0A2	11.1868	11.5799	11.7037	10.8989	10.6786	10.4936	ATP6V0A2	52.5478	49.8782	50.2193	48.3604	49.2803	50.0943	ATP6V0A2	37.8854	38.0971	38.5525	35.1279	39.6447	39.0167
ATP6V0A4	1.06062	0.93172	0.836205	0.858647	0.905424	1.0328	ATP6V0A4	2.91037	1.91448	1.85337	3.11771	2.48262	2.63645	ATP6V0A4	5.90739	6.54921	5.10596	5.57486	5.81061	5.62122	ATP6V0A4	1.75117	1.20797	1.84136	1.90128	1.27801	1.69316
ATP6V0B	158.761	164.621	167.435	146.721	154.324	155.914	ATP6V0B	205.336	217.335	208.994	200.554	204.15	213.561	ATP6V0B	170.007	190.459	189.978	184.61	182.463	183.197	ATP6V0B	357.957	360.053	321.341	333.734	315.808	298.99
ATP6V0C	393.603	373.857	360.213	346.654	344.356	359.553	ATP6V0C	711.353	703.063	708.858	689.22	680.983	663.184	ATP6V0C	563.513	572.681	563.278	546.86	544.59	531.753	ATP6V0C	722.871	733.125	683.669	695.093	702.367	695.042
ATP6V0CP3	0	0	0	0	0	0	ATP6V0CP3	0	0	0	0	0.108668	0
ATP6V0D1	123.527	119.174	117.664	113.004	113.36	115.287	ATP6V0D1	172.726	161.621	171.518	161.892	159.295	159.104	ATP6V0D1	225.878	228.877	218.087	215.9	215.016	211.754	ATP6V0D1	143.451	149.833	145.69	144.218	145.595	147.178
ATP6V0D1-DT	2.97154	1.34265	1.81561	2.83542	2.76221	2.30826	ATP6V0D1-DT	2.81891	2.26715	2.93694	2.4071	2.44157	2.57004
ATP6V0D2	0	0.020995	0.074371	0.072539	0.085255	0.048913	ATP6V0D2	0.062955	0.162871	0.308642	0.286548	0.097142	0.096769	ATP6V0D2	1.22004	1.15585	1.63561	1.40912	1.31628	1.21833	ATP6V0D2	0	0	0	0	0	0
ATP6V0E1	215.733	224.449	221.224	214.12	204.208	204.282	ATP6V0E1	226.859	241.409	227.918	228.707	228.726	240.955	ATP6V0E1	440.57	448.251	428.53	411.675	424.904	418.666	ATP6V0E1	359.433	350.041	335.995	332.641	333.668	318.231
ATP6V0E2	110.164	100.52	103.928	100.886	98.1276	98.7065	ATP6V0E2	45.2689	44.9033	43.8738	44.0774	42.6585	44.0516
ATP6V0E2-AS1	1.67683	2.17876	1.9987	1.97475	2.04917	1.79957	ATP6V0E2-AS1	1.17945	1.34426	1.31956	1.07133	1.17331	0.957883
ATP6V1A	38.5056	36.7239	36.5252	34.7998	32.8628	34.2332	ATP6V1A	73.4072	72.4581	74.3147	73.4821	71.4816	67.2072	ATP6V1A	78.5881	77.4186	73.6838	73.5316	74.016	76.9311	ATP6V1A	87.3372	90.089	90.499	85.6526	91.5817	93.1553
ATP6V1B1	1.15528	1.29577	1.65621	1.37942	1.72924	1.62408	ATP6V1B1	0.782538	1.01277	0.529455	0.40875	0.753352	0.598434	ATP6V1B1	0.159834	0.033982	0.041593	0.043477	0.098141	0.03983	ATP6V1B1	0	0	0	0	0	0.053708
ATP6V1B1-AS1	0	0.073915	0	0	0	0.086887	ATP6V1B1-AS1	0.217391	0.575458	0.415043	0.508648	0.760332	0.501892
ATP6V1B2	53.3075	58.1093	53.9822	49.8367	53.1498	52.1015	ATP6V1B2	143.942	142.475	147.591	133.213	140.322	141.383	ATP6V1B2	97.7878	99.352	101.839	97.9594	98.2102	98.5438	ATP6V1B2	104.42	110.23	105.67	98.835	106.469	99.8682
ATP6V1C1	33.0154	32.7701	31.075	29.3923	29.0736	28.5774	ATP6V1C1	33.2881	33.3989	33.1282	31.3906	32.6473	30.9801	ATP6V1C1	62.5278	61.3559	61.3659	56.1108	61.3104	63.5363	ATP6V1C1	133.988	129.301	141.664	126.068	135.69	144.435
ATP6V1C2	0	0.016607	0.092342	0	0	0	ATP6V1C2	0.216313	0.387103	0.213418	0.349491	0.497066	0.406235	ATP6V1C2	0	0	0	0	0	0	ATP6V1C2	0.113768	0.044435	0	0	0.047924	0
ATP6V1D	77.9349	73.517	72.7617	70.8619	67.5508	67.1598	ATP6V1D	120.125	119.548	118.984	115.891	115.499	121.364	ATP6V1D	162.739	150.405	151.48	153.219	156.448	153.957	ATP6V1D	286.162	283.277	287.624	284.408	293.761	286.677
[truncated: 43,327 more rows]

## Sheet: Table S7
P. alecto	Gene Name (NCBI)		E. fuscus	Gene Name (NCBI)
[truncated: 24 more rows]
