# Supplementary material for: Bat-specific adaptations in interferon signaling and GBP1 contribute to enhanced viral tolerance
Source: Research Square preprint supplement (doi:10.21203/rs.3.rs-5411236/v1), 2024-11-26
Supplement: Supplementary file 1 [file 380847b1a98f407a32246ac1.pdf]

## **SUPPLEMENTARY MATERIALS FOR**

### **Bat-specific adaptations in interferon signaling and GBP1 contribute to enhanced viral tolerance**

Victoria Gonzalez<sup>1,2</sup>, Briallen Lobb<sup>3</sup>, Jacob Côté<sup>4,5,6,7</sup>, Arkadeb Bhuinya<sup>1,2</sup>, Adriana G. Tubb<sup>8</sup>, Stephen S. Nuthalapati<sup>8</sup>, Akarin Asavajaru<sup>1</sup>, Yan Zhou<sup>1,2</sup>, Vikram Misra<sup>2</sup>, Darryl Falzarano<sup>1,2</sup>, Trevor R. Sweeney<sup>8,9</sup>, Sophie M.-C. Gobeil<sup>4,5,6,7</sup>, Linfa Wang<sup>10</sup>, Andrew Doxey<sup>3</sup>, and Arinjay Banerjee<sup>1,2,3,11,12,\*</sup>

The supplement contains: Supplementary Figures 1 to 17

Supplementary Tables S1 to S7 are provided as sheets in a separate Excel file



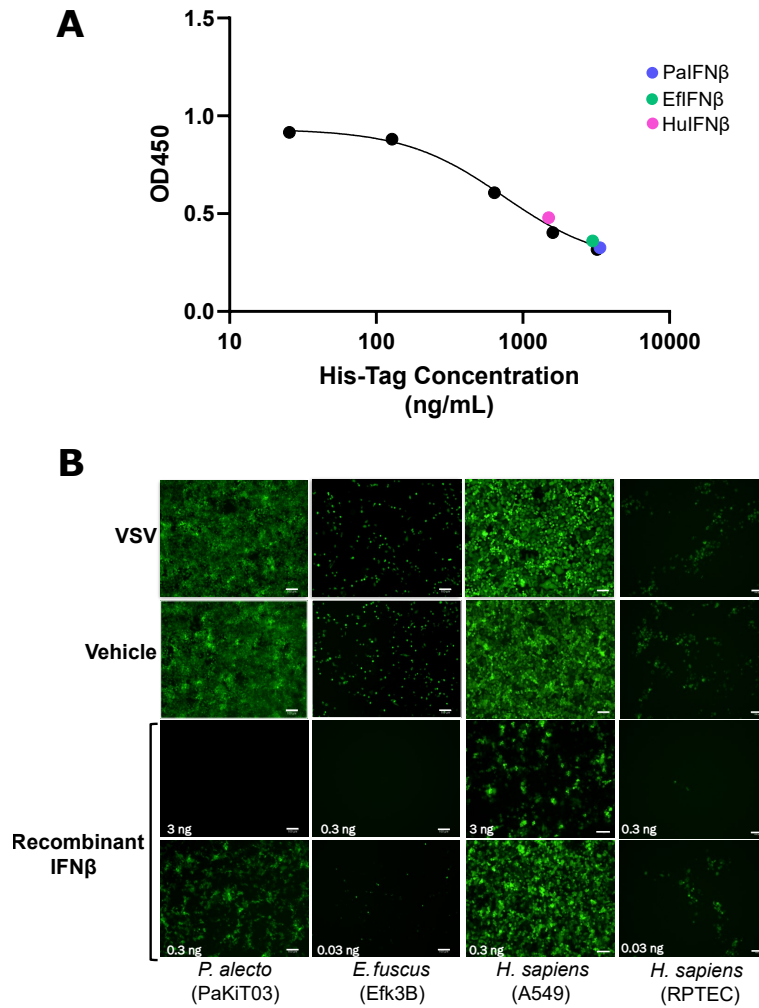

**Supplementary Figure 1. Generation of functional IFN $\beta$ .** (A) Stock concentrations for IFN $\beta$  expressing a 6x-His tag for *P. alecto*, *E. fuscus* and humans were determined by a competitive ELISA. Black dots represent standards included in the commercial ELISA. (B) *P. alecto* (PaKiT03), *E. fuscus* (EfK3B), and human A549 and primary RPTEC cells were treated with the vehicle control or with serially diluted, species-matched IFN $\beta$  for 6 hours prior to infection with VSV-GFP (MOI 0.1). Infection levels were assessed 16 hours post infection using fluorescent microscopy. The last dilution where 100% protection was observed was selected as 1 unit (i.e. 1U) of IFN $\beta$  for each species. Scale bars = 100  $\mu$ M. Image is representative of 3 replicates.

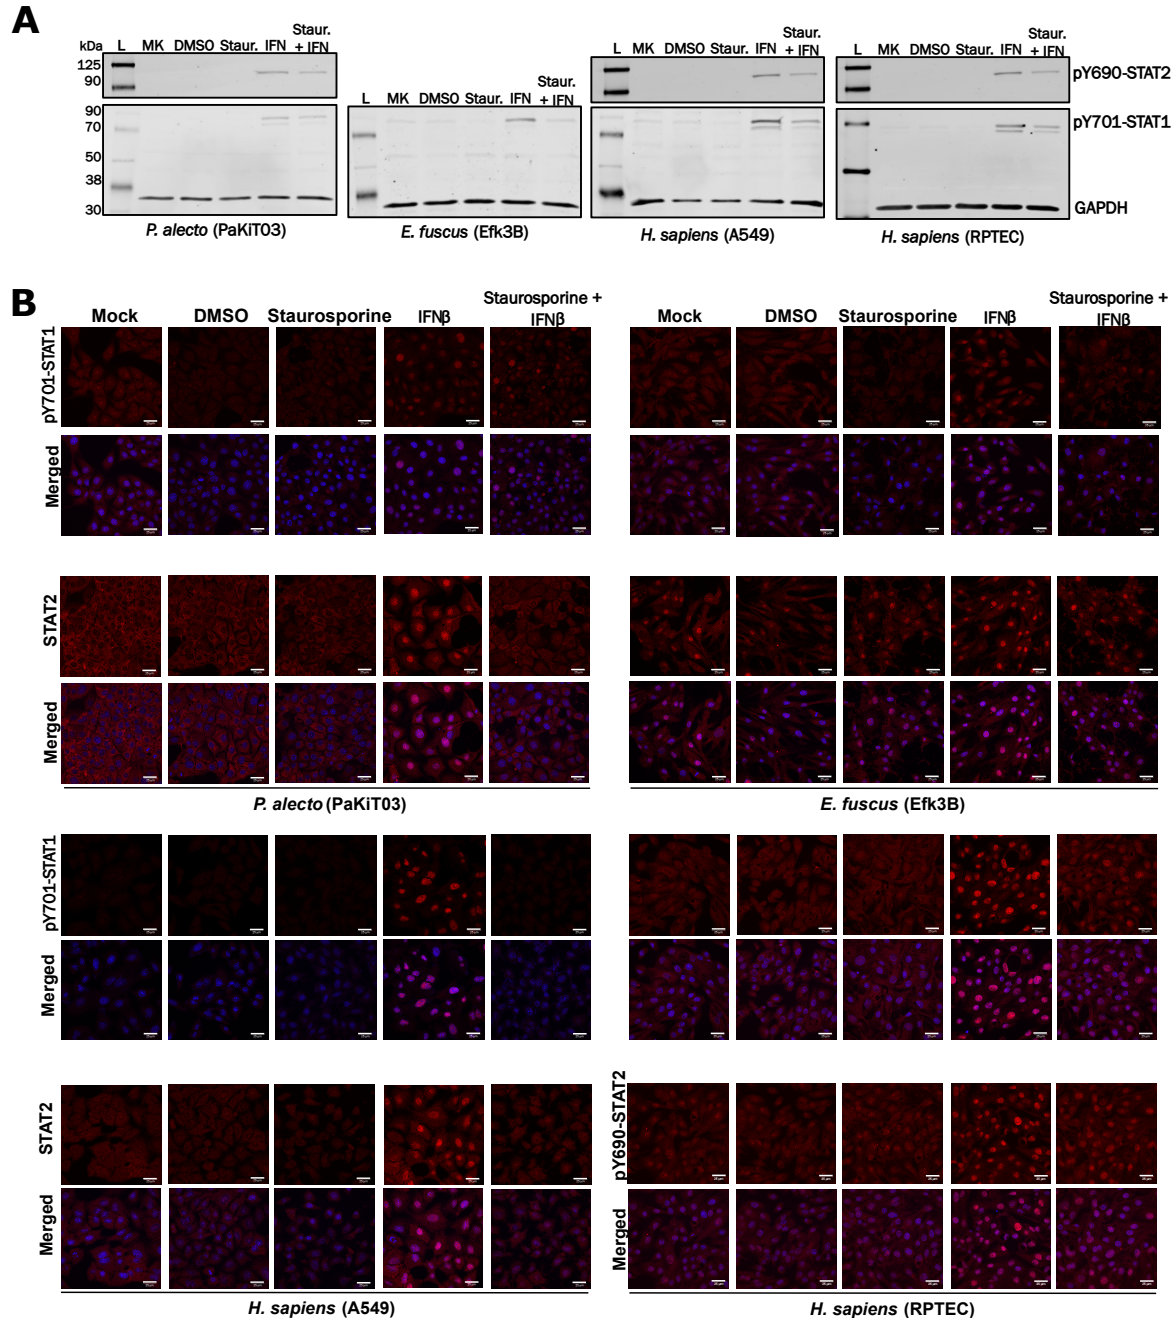

**Supplementary Figure 2. Phosphorylation of STAT1 and STAT2 during bat IFN $\beta$  signaling.** *P. alecto* (PaKiT03), *E. fuscus* (EfK3B), and human (A549, RPTEC) cells were treated with Staurosporine (Staur; 500nM), species-matched IFN $\beta$  (10 U/mL), or treated with both Staurosporine and IFN $\beta$  for 4 hours. (A) Protein lysates from cells were harvested to evaluate the phosphorylation of STAT1 (pY701-STAT1) and STAT2 (pY690-STAT2). GAPDH was used as a loading control. Lane “L” represents molecular weight ladder (kDa). (B) Cells were fixed in 100% methanol and stained for pY701-STAT1, pY690-STAT2, STAT2, and/or DAPI. Nuclear translocation was visualized by confocal microscopy. Scale bars = 25  $\mu$ M. Image is representative of 3 replicates.

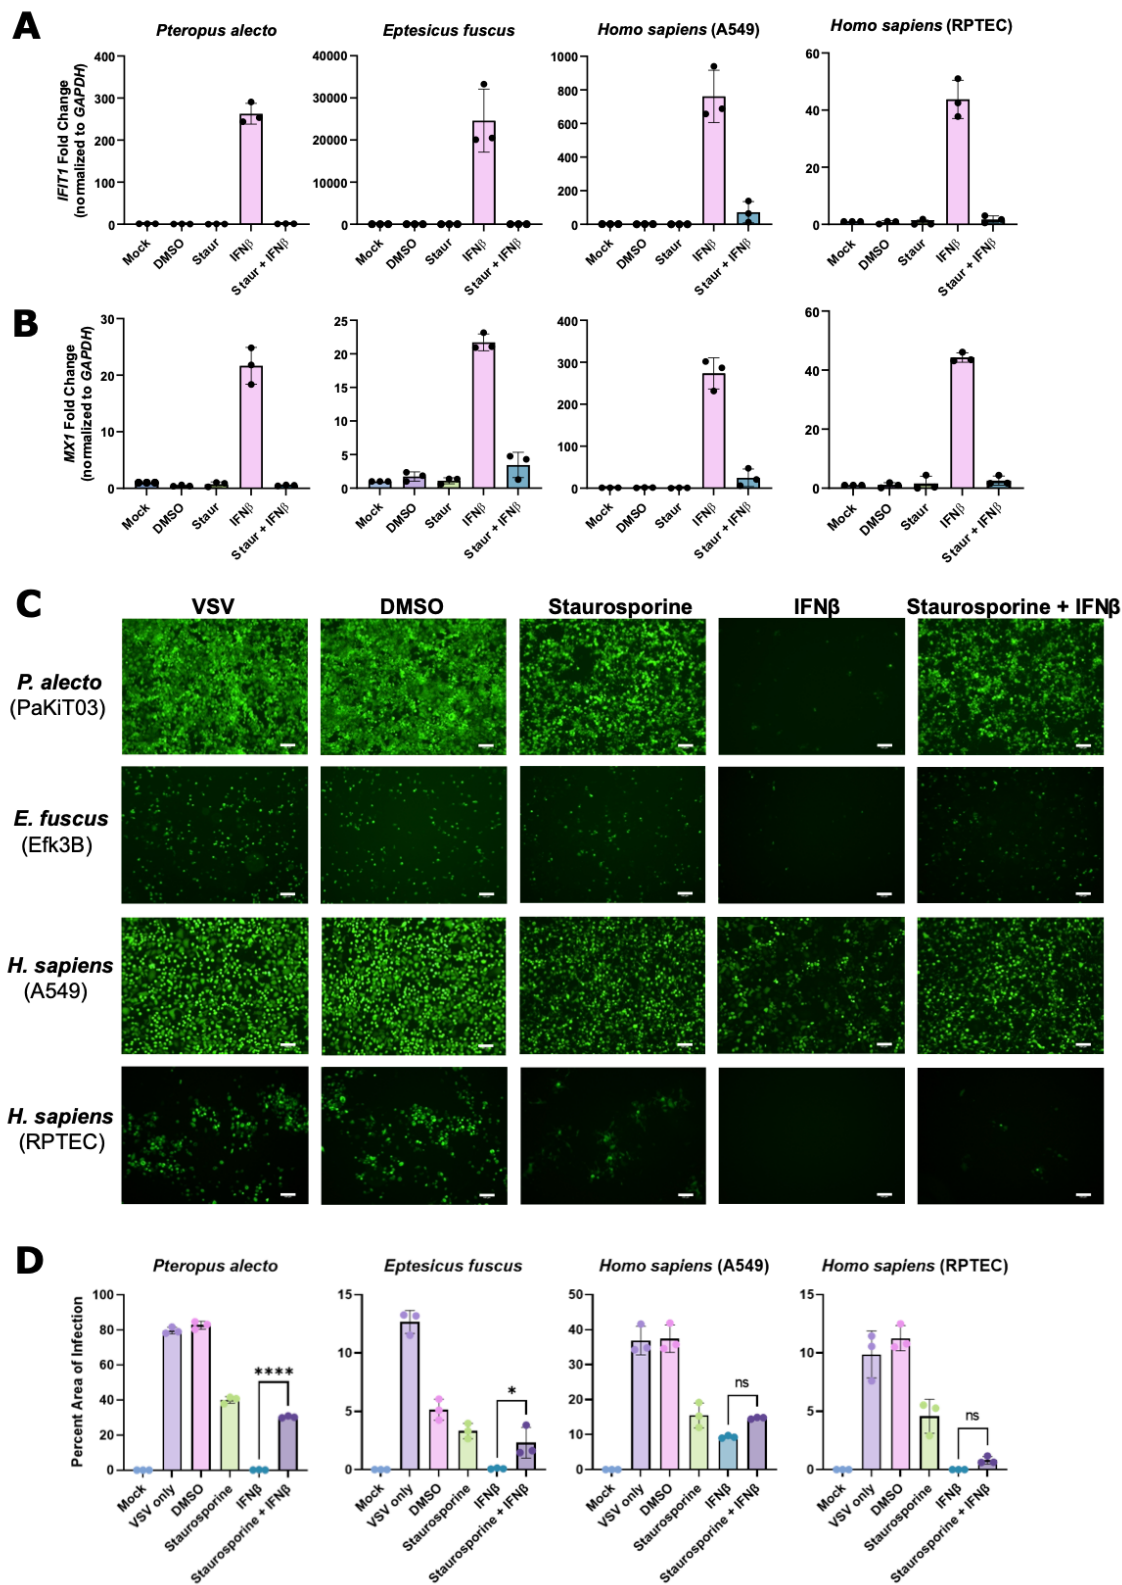

**Supplementary Figure 3. Phosphorylation is required for IFN $\beta$ -induced antiviral response.** *P. alecto* (PaKiT03), *E. fuscus* (EfK3B), and human (A549, RPTEC) cells were

treated with Staurosporine (Staur; 500nM), species-matched IFN $\beta$  (10 U/mL), or treated with both Staurosporine and IFN $\beta$  for 4 hours. qRT-PCR was performed to evaluate the upregulation of *IFIT1* (**A**) and *MX1* (**B**) transcripts. (**C**) Following 4 hours of Staurosporine and/or IFN $\beta$  treatment, cells were infected with VSV-GFP (MOI 0.1) for 16 hours. Viral replication was visualized using fluorescent microscopy, and (**D**) GFP signal was quantified using ImageJ to determine percent area of infection. Data are represented as mean  $\pm$  SD, n=3 replicates/time points (Ordinary one-way ANOVA).

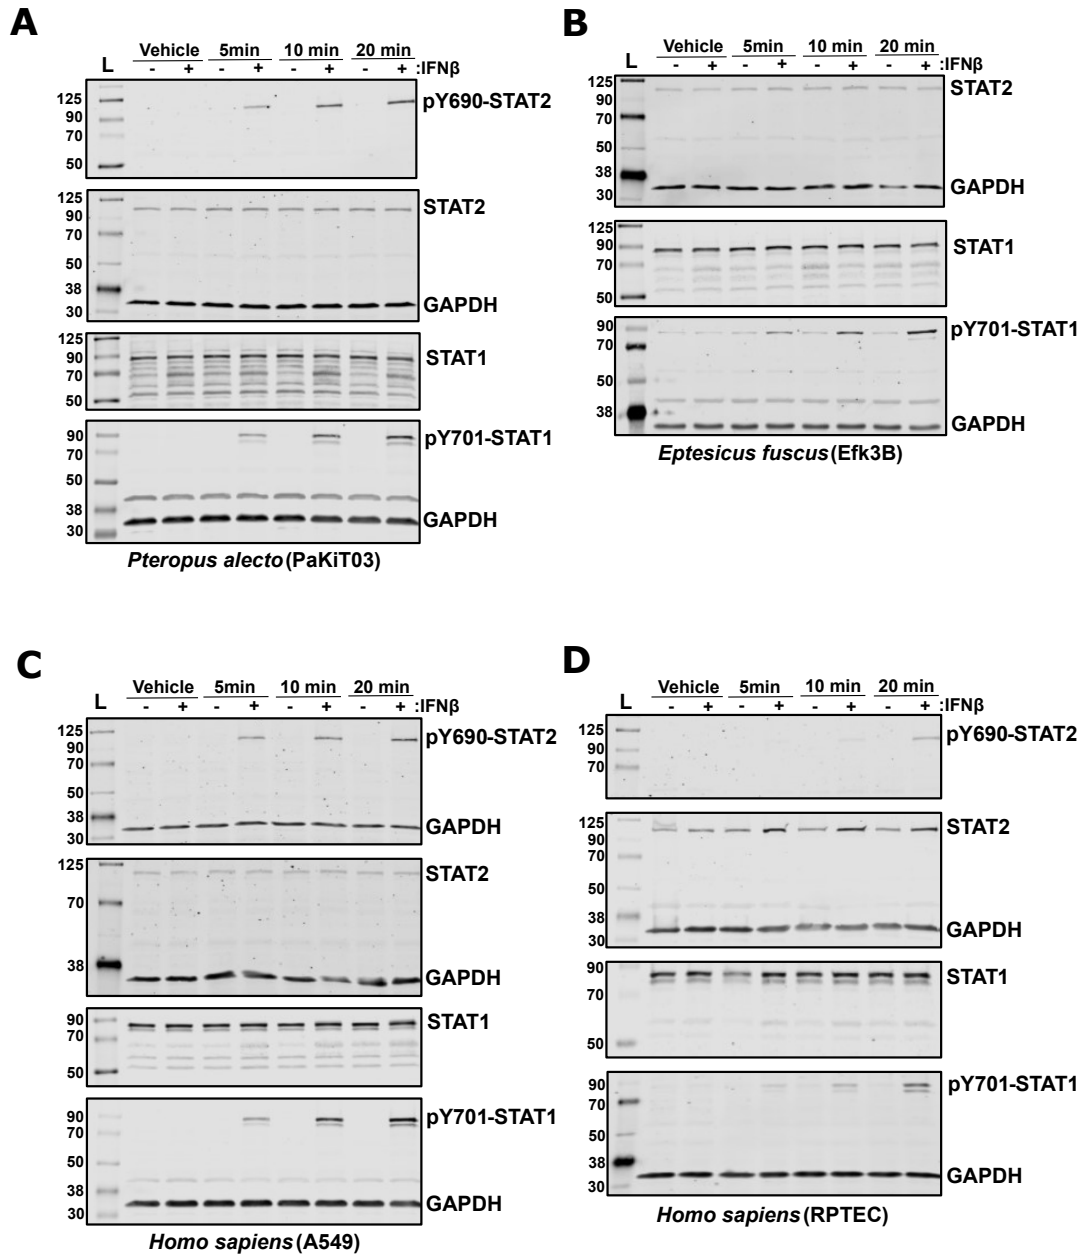

**Supplementary Figure 4. Full immunoblots for STAT1 and STAT2 phosphorylation.** PaKiT03 (A), Efk3B (B), A549 (C), and RPTEC (D) cells were treated with vehicle or species matched IFN $\beta$  (10 U/mL) for 5, 10, and 20 minutes. Total STAT1, STAT2, and phosphorylated STAT1 (pY701-STAT1) and STAT2 (pY690-STAT2) were assessed by immunoblotting. GAPDH was used as a loading control. Lane "L" represents molecular weight ladder (kDa).

|                  |   |                                                                                   |    |
|------------------|---|-----------------------------------------------------------------------------------|----|
| P. alecto        | 1 | MAQWEMLNQNDSPFQDQLHQLYTNSSLVPDIRQYLAVWIEDQNWQEAALGKDDSKANMLFFHFLDQLKYECCGRCSQDPEC | 80 |
| P. giganteus     | 1 | MAQWEMLNQNDSPFQDQLHQLYTNSSLVPDIRQYLAVWIEDQNWQEAALGKDDSKANMLFFHFLDQLKYECCGRCSQDPEC | 80 |
| P. vampyrus      | 1 | MAQWEMLNQNDSPFQDQLHQLYTNSSLVPDIRQYLAVWIEDQNWQEAALGKDDSKANMLFFHFLDQLKYECCGRCSQDPEC | 80 |
| P. rodricensis   | 1 | MAQWEMLNQNDSPFQDQLHQLYTNSSLVPDIRQYLAVWIEDQNWQEAALGKDDSKANMLFFHFLDQLKYECCGRCSQDPEC | 80 |
| R. aegyptiacus   | 1 | MAQWEMLNQNDSPFQDQLHQLYTNSSLVPDIRQYLAVWIEDQNWQEAALGNDSSKANMLFFHFLDQLKYECCGRCSQDPEC | 80 |
| R. ferrumequinum | 1 | MAQWEMLNQNDSPFQDQLHQLYTNSSLVPDIRQYLAVWIEDQNWQEAALGNDSSKANMLFFHFLDQLKYECCGRCSQDPEC | 80 |
| S. hondurensis   | 1 | MAQWEMLNQNDSPFQDQLHQLYTNSSLPMDIRQYLAVWIEDQNWQEAALGNNSSQANMLFLHFSQDQNYECARCSQDPEC  | 80 |
| A. jamaicensis   | 1 | MAQWEMLNQNDSPFQDQLHQLYTNSSLPMDIRQYLAVWIEDQNWQEAALGNNSSQANMLFLHFSQDQNYECARCSQDPEC  | 80 |
| P. discolor      | 1 | MAQWEMLNQNDSPFQDQLHQLYTNSSLPMDIRQYLAVWIEDQNWQEAALRN-SYQANMLFLHFSQDQNYECARCSQDPEC  | 79 |
| P. hasatus       | 1 | MAQWEMLNQNDSPFQDQLHQLYTNSSLPMDIRQYLAVWIEDQNWQEAALRN-SYQANMLFLHFSQDQNYECARCSQDPEC  | 79 |
| D. rotundus      | 1 | MAQWEMLNQNDSPFQDQLHQLYTNSSLPMDIRQYLAVWIEDQNWQEAALGNNSSQANMLFLHFLDQNYECARCSQDPEC   | 80 |
| E. fuscus        | 1 | MAQWEMLNQNDSPFQDQLHQLYTNSSLVPDIRQYLAVWIEDQNWQEAALGSDNSQANMLCFHFLDQNYECARCSQDPEC   | 80 |
| H. armiger       | 1 | MAQWEMLNQNDSPFQDQLHQLYTNSSLVPDIRQYLAVWIEDQNWQEAALGSDSSKANMLFFHFLDQNYECGRCSQDPEC   | 80 |
| M. molossus      | 1 | MAQWEMLNQNDSPFQDQLHQLYTNSSLVPDIRQYLAVWIEDQNWQEAALGSDNSQANMLYLFHFLDQNYECARCSQDPEC  | 80 |
| M. natalensis    | 1 | MAQWEMLNQNDSPFQDQLHQLYTNSSLPMDIRQYLAVWIEDQNWQEAALGNDSSQANMLFFHFLDQNYECGRCSQDPEC   | 80 |
| M. brandtii      | 1 | MAQWEMLNQNDSPFQDQLHQLYTNSSLVPDIRQYLAVWIEDQNWQEAALGNDSSQANMLCFHFVQDQNYECARCSQDPEC  | 80 |
| M. lucifugus     | 1 | MAQWEMLNQNDSPFQDQLHQLYTNSSLVPDIRQYLAVWIEDQNWQEAALGNDSSQANMLCFHFVQDQNYECARCSQDPEC  | 80 |
| M. myotis        | 1 | MAQWEMLNQNDSPFQDQLHQLYTNSSLVPDIRQYLAVWIEDQNWQEAALGNDSSQANMLCFHFVQDQNYECARCSQDPEC  | 80 |
| M. davidii       | 1 | MAQWEMLNQNDSPFQDQLHQLYTNSSLVPDIRQYLAVWIEDQNWQEAALGNDSSQANMLCFHFVQDQNYECARCSQDPEC  | 80 |
| P. kuhlii        | 1 | MAQWEMLNQNDSPFQDQLHQLYTNSSLVPDIRQYLAVWIEDQNWQEAALGNDSSQANMLCFHFVQDQNYECARCSQDPEC  | 80 |
| H. sapiens       | 1 | MAQWEMLNQNDSPFQDQLHQLYTNSSLVPDIRQYLAVWIEDQNWQEAALGSDSSKANMLFFHFLDQNYECGRCSQDPEC   | 80 |

|                  |    |                                                                                     |     |
|------------------|----|-------------------------------------------------------------------------------------|-----|
| P. alecto        | 81 | LLLQHNLRKFCRDIQAFPPQGPQTQLAEMIFNLLLEEKRILIAQRAQLLEQGEVPVEVPVESQQ-PEIESRILELRVMMMEKL | 159 |
| P. giganteus     | 81 | LLLQHNLRKFCRDIQAFPPQGPQTQLAEMIFNLLLEEKRILIAQRAQLLEQGEVPVEVPVESQQ-PEIESRILELRVMMMEKL | 159 |
| P. vampyrus      | 81 | LLLQHNLRKFCRDIQAFPPQGPQTQLAEMIFNLLLEEKRILIAQRAQLLEQGEVPVEVPVESQQ-PEIESRILELRVMMMEKL | 159 |
| P. rodricensis   | 81 | LLLQHNLRKFCRDIQAFPPQGPQTQLAEMIFNLLLEEKRILIAQRAQLLEQGEVPVEVPVESQQ-PEIESRILELRVMMMEKL | 159 |
| R. aegyptiacus   | 81 | LLLQHNLRKFCRDIQAFPPQGPQTQLAEMIFNLLLEEKRILIAQRAQLLEQGEPALEVPVESQQ-PEIESRILELRVMMMEKL | 159 |
| R. ferrumequinum | 81 | LLLQHNLRKFCRDIQAFPPQGPQTQLAEMIFNLLLEEKRILIAQRAQLLEQGEPALEAPVESQQHEIESRILELRAMMEKL   | 160 |
| S. hondurensis   | 81 | LLLQHNLRKFCRDIQAFPPGGPIQLAEMIFNLLLEEKRILIAQRAQVEQEEPDQLQAPVESQQ-HEIESRILELRAMMEKL   | 159 |
| A. jamaicensis   | 81 | LLLQHNLRKFCRDIQAFPPGGPIQLAEMIFNLLLEEKRILIAQRAQVEQEEPDQLHAPVESQQ-HEIESRILELRAMMEKL   | 159 |
| P. discolor      | 80 | LLLQHNLRKFCRDIQAFPPGGPIQLAEMIFNLLLEEKRILIAQRAQVEQEEPDQLQAPVESQQ-HEIESRILELRAMMEKL   | 158 |
| P. hasatus       | 80 | LLLQHNLRKFCRDIQAFPPGGPIQLAEMIFNLLLEEKRILIAQRAQVEQEEPDQLQAPVESQQ-HEIESRILELRAMMEKL   | 158 |
| D. rotundus      | 81 | LLLQHNLRKFCRDIQAFPPGGPIQLAEMIFNLLLEEKRILIAQRAQVEQEEPDQLHAPVESQQ-HEIESRILELRAMMEKL   | 159 |
| E. fuscus        | 81 | LLLQHNLRKFCRDIQAFPPGGPIQLAEMIFNLLLEEKRILIAQRAQVEQEEPALEAPVESQQ-HEIESRILELRAMMEKL    | 159 |
| H. armiger       | 81 | LLLQHNLRKFCRDIQAFPPGGPIQLAEMIFNLLLEEKRILIAQRAQVEQEEPALEAPVESQQ-HEIESRILELRAMMEKL    | 159 |
| M. molossus      | 81 | LLLQHNLRKFCRDIQAFPPGGPIQLAEMIFNLLLEEKRILIAQRAQVEQEEPALEAPVESQQ-HEIESRILELRAMMEKL    | 159 |
| M. natalensis    | 81 | LLLQHNLRKFCRDIQAFPPGGPIQLAEMIFNLLLEEKRILIAQRAQVEQEEPALEAPVESQQ-HEIESRILELRAMMEKL    | 159 |
| M. brandtii      | 81 | LLLQHNLRKFCRDIQAFPPGGPIQLAEMIFNLLLEEKRILIAQRAQVEQEEPALEAPVESQQ-HEIESRILELRAMMEKL    | 159 |
| M. lucifugus     | 81 | LLLQHNLRKFCRDIQAFPPGGPIQLAEMIFNLLLEEKRILIAQRAQVEQEEPALEAPVESQQ-HEIESRILELRAMMEKL    | 159 |
| M. myotis        | 81 | LLLQHNLRKFCRDIQAFPPGGPIQLAEMIFNLLLEEKRILIAQRAQVEQEEPALEAPVESQQ-HEIESRILELRAMMEKL    | 159 |
| M. davidii       | 81 | LLLQHNLRKFCRDIQAFPPGGPIQLAEMIFNLLLEEKRILIAQRAQVEQEEPALEAPVESQQ-HEIESRILELRAMMEKL    | 159 |
| P. kuhlii        | 81 | LLLQHNLRKFCRDIQAFPPGGPIQLAEMIFNLLLEEKRILIAQRAQVEQEEPALEAPVESQQ-HEIESRILELRAMMEKL    | 159 |
| H. sapiens       | 81 | LLLQHNLRKFCRDIQAFPPGGPIQLAEMIFNLLLEEKRILIAQRAQLLEQGEVPVEVPVESQQ-HEIESRILELRAMMEKL   | 159 |

|                  |     |                                                                                 |     |
|------------------|-----|---------------------------------------------------------------------------------|-----|
| P. alecto        | 160 | VKSISQLKDQDVFVCFRYKTS--VRTASLDPHQIRQQQLQETLNELDKRRKEVLDASKALLGLRTTLTELLPKLEEWK  | 237 |
| P. giganteus     | 160 | VKSISQLKDQDVFVCFRYKTHTLARTASLDPHQIRQQQLQETLNELDKRRKEVLDASKALLGLRTTLTELLPKLEEWK  | 239 |
| P. vampyrus      | 160 | VKSISQLKDQDVFVCFRYKTHTLARTASLDPHQIRQQQLQETLNELDKRRKEVLDASKALLGLRTTLTELLPKLEEWK  | 239 |
| P. rodricensis   | 160 | VKSISQLKDQDVFVCFRYKTHTLARTASLDPHQIRQQQLQETLNELDKRRKEVLDASKALLGLRTTLTELLPKLEEWK  | 239 |
| R. aegyptiacus   | 160 | VKSISQLKDQDVFVCFRYKTHISVKTPTSLDPHQIRHQQLQETLNELDKRRKEVLDSSKALLGLRTTLTELLPKLEEWK | 239 |
| R. ferrumequinum | 161 | VKSISQLKDQDVFVCFRYNTQKSVRTPSLDPHQTRHQQLQETLNELDKRRKEVLDTSKALLGLRTTLTELLPKLEEWK  | 240 |
| S. hondurensis   | 160 | VKSISQLKDQDVFVCFRYKTQAPVRTASLDPHHTKQKQLQETLNELDKRRKEVLDSSRALLGLRTTLTELLPKLEEWK  | 239 |
| A. jamaicensis   | 160 | VKSISQLKDQDVFVCFRYKTQAPVRTASLDPHHTKQKQLQETLNELDKRRKEVLDSSRALLGLRTTLTELLPKLEEWK  | 239 |
| P. discolor      | 159 | VKSISQLKDQDVFVCFRYKTQAPVRTASLDPHHTKQKQLQETLNELDKRRKEVLDSSRALLGLRTTLTELLPKLEEWK  | 238 |
| P. hasatus       | 159 | VKSISQLKDQDVFVCFRYKTQAPVRTASLDPHHTKQKQLQETLNELDKRRKEVLDSSRALLGLRTTLTELLPKLEEWK  | 238 |
| D. rotundus      | 160 | VKSISQLKDQDVFVCFRYKTQAPVRTASLDPHHTQKQLQETLNELDKRRKEVLDSSRALLGLRTTLTELLPKLEEWK   | 239 |
| E. fuscus        | 160 | VKSISQLKDQDVFVCFRYKTQAPVRTASLDPHHTQKQLQETLNELDKRRKEVLDSSRALLGLRTTLTELLPKLEEWK   | 239 |
| H. armiger       | 160 | VKSISQLKDQDVFVCFRYKTQAPVRTASLDPHHTQKQLQETLNELDKRRKEVLDSSRALLGLRTTLTELLPKLEEWK   | 239 |
| M. molossus      | 160 | VKSISQLKDQDVFVCFRYKTQAPVRTASLDPHHTQKQLQETLNELDKRRKEVLDSSRALLGLRTTLTELLPKLEEWK   | 239 |
| M. natalensis    | 160 | VKSISQLKDQDVFVCFRYKTQAPVRTASLDPHHTQKQLQETLNELDKRRKEVLDSSRALLGLRTTLTELLPKLEEWK   | 239 |
| M. brandtii      | 160 | VKSISQLKDQDVFVCFRYKTQAPVRTASLDPHHTQKQLQETLNELDKRRKEVLDSSRALLGLRTTLTELLPKLEEWK   | 239 |
| M. lucifugus     | 160 | VKSISQLKDQDVFVCFRYKTQAPVRTASLDPHHTQKQLQETLNELDKRRKEVLDSSRALLGLRTTLTELLPKLEEWK   | 239 |
| M. myotis        | 160 | VKSISQLKDQDVFVCFRYKTQAPVRTASLDPHHTQKQLQETLNELDKRRKEVLDSSRALLGLRTTLTELLPKLEEWK   | 239 |
| M. davidii       | 160 | VKSISQLKDQDVFVCFRYKTQAPVRTASLDPHHTQKQLQETLNELDKRRKEVLDSSRALLGLRTTLTELLPKLEEWK   | 239 |
| P. kuhlii        | 160 | VKSISQLKDQDVFVCFRYKTQAPVRTASLDPHHTQKQLQETLNELDKRRKEVLDSSRALLGLRTTLTELLPKLEEWK   | 239 |
| H. sapiens       | 160 | VKSISQLKDQDVFVCFRYKTQAPVRTASLDPHHTQKQLQETLNELDKRRKEVLDSSRALLGLRTTLTELLPKLEEWK   | 239 |

**\*Supplementary Figure 5 continues on next page**



|                  |     |                                                                                    |                 |     |
|------------------|-----|------------------------------------------------------------------------------------|-----------------|-----|
| P. alecto        | 238 | VQQQKACIGSREDG--GLELSQLEKWFTDGAKLLFHLRQLLKKELKGLSHLVSYHHDPLTTGVDLR                 | EAQVTELLQRLLLR  | 315 |
| P. giganteus     | 240 | VQQQKACIGSREDG--GLELSQLEKWFTDGAKLLFHLRQLLKKELKGLSHLVSYHHDPLTTGVDLR                 | EAQVTELLQRLLLR  | 317 |
| P. vampyrus      | 240 | VQQQKACIGSREDG--GLELSQLEKWFTDGAKLLFHLRQLLKKELKGLSHLVSYHHDPLTTGVDLR                 | EAQVTELLQRLLLR  | 317 |
| P. rodricensis   | 240 | VQQQKACIGSREDG--GLELSQLEKWFTDGAKLLFHLRQLLKKELKGLSHLVSYHHDPLTTGVDLR                 | EAQVTELLQRLLLR  | 317 |
| R. aegyptiacus   | 240 | VQQQKACIGSREDG--GLELPQLEKWFTDGAKLLFHLRQLLKKELKGLSHLVSYQDDPLTTGVDLR                 | EAQVTELLQRLLHRA | 317 |
| R. ferrumequinum | 241 | VQQQKACIGAPLDG--GLELLQLEKWFTDGAKLLFHLRQLLKKELKGLSHLVSYHHDPLTKGVDLR                 | EAQVTELLQRLLHRA | 318 |
| S. hondurensis   | 240 | AQQQKACIGAPTNGGLELELLQLLEKWFTDGAKLLFHLRQLLKKELKGLSLLVTYENDPLTKGVDMQEAQVMELLQRLLHRA | 319             |     |
| A. jamaicensis   | 240 | AQQQKACIGAPTNGGLELELLQLLEKWFTDGAKLLFHLRQLLKKELKGLSLLVTYENDPLTKGVDMQEAQVMELLQRLLHRA | 319             |     |
| P. discolor      | 239 | AQQQKACIGAPTNG--GLQLLQLEKWFTDGAKLLFHLRQLLKKELKGLSLLVTYENDPLTKGVDMQEAQVMELLQRLLHRA  | 316             |     |
| P. hasatus       | 239 | AQQQKACIGAPTNG--GLQLLQLEKWFTDGAKLLFHLRQLLKKELKGLSLLVTYDNDPLTKGVDMQEAQVMELLQRLLHRA  | 316             |     |
| D. rotundus      | 240 | AQQQKACIGAPTNG--GLELLQLEKWFTDGAKLLFHLRQLLKKELKGLSLLVTYQNDPLTKGVDMQEAQVMELLQRLLHRA  | 317             |     |
| E. fuscus        | 240 | AQQQKACIGAPPDG--GLELLQLEKWFTDGAKLLFHLRQLLKKELKGLSLVLYTPNDPLITGVDLQEAQVTELLQHLLHRA  | 317             |     |
| H. armiger       | 240 | VQQQKACIGAPVDG--GLELFQLEKWFTDGAKLLFHLRQLLKKELKGLSRLVSYQDDPLTKGVHLQEAQVTELLQRLLHRA  | 317             |     |
| M. molossus      | 239 | AQQQKACIGAPLDG--GVELPQLEKWFTDGAKLLFHLRQLLKKELKGLSRLVSYQNDPLTKGVDLQEAQVTELLQRLLHRA  | 316             |     |
| M. natalensis    | 239 | AQQQKACIGAPQDG--GLGLLQLEKWFTDGAKLLFHLRQLLKKELKGLSNLVSYENDPLTKGVDLQEAQVTELLQRLLHRA  | 316             |     |
| M. brandtii      | 240 | VQQQKACIGAPPDG--GLELLQLEKWFTDGAKLLFHLRQLLKKELKGLSRLVSYENDPLITGVDLQEAQVTELLQHLLHRA  | 317             |     |
| M. lucifugus     | 240 | VQQQKACIGAPPDG--GLELLQLEKWFTDGAKLLFHLRQLLKKELKGLSRLVSYENDPLITGVGOQEAQVTELLQHLLHRA  | 317             |     |
| M. myotis        | 240 | VQQQKACIGAPPDG--GLELLQLEKWFTDGAKLLFHLRQLLKKELKGLSRLVSYENDPLISGVGLQEAQVTELLQHLLHRA  | 317             |     |
| M. davidii       | 240 | VQQQKACIGAPPDG--GLELLQLEKWFTDGAKLLFHLRQLLKKELKGLSRLVSYENDPLITGVDLQEAQVTELLQHLLHRA  | 317             |     |
| P. kuhlii        | 239 | AQQQKACIGAPAEQ--GLELVQLEKWFTDGAKLLFHLRQLLKKELKGLS-HVSYDNDRLASGADQQQARATELLRHLLHRA  | 315             |     |
| H. sapiens       | 240 | AQQQKACIRAPIDH--GLE--QLETWFTDGAKLLFHLRQLLKKELKGLSCLVSYQDDPLTKGVDLR                 | EAQVTELLQRLLHRA | 315 |

|                  |     |                                                                                  |     |
|------------------|-----|----------------------------------------------------------------------------------|-----|
| P. alecto        | 316 | FVVETQPCMPQTPHRPLILRTGSKFTVTRRLVRLQEGNETLTAEVFIDRNPLQSQGRKFNFILTSNRKTLTPEKGQSQG  | 395 |
| P. giganteus     | 318 | FVVETQPCMPQTPHRPLILRTGSKFTVTRRLVRLQEGNETLTAEVFIDRNPLQSQGRKFNFILTSNRKTLTPEKGQSQG  | 397 |
| P. vampyrus      | 318 | FVVETQPCMPQTPHRPLILRTGSKFTVTRRLVRLQEGNETLTAEVFIDRNPLQSQGRKFNFILTSNRKTLTPEKGQSQG  | 397 |
| P. rodricensis   | 318 | FVVETQPCMPQTPHRPLILRTGSKFTVTRRLVRLQEGNETLTAEVFIDRNPLQSQGRKFNFILTSNRKTLTPEKGQSQG  | 397 |
| R. aegyptiacus   | 318 | FVVETQPCMPQTPHRPLILRTGSKFTVTRRLVRLQEGNESLTAEVFIDRNSLQSQGRKFNFILTSNRKTLTPEKGQSQG  | 397 |
| R. ferrumequinum | 319 | FVVETQPCMPQTPHRPLILRTGSKFTVTRRLVRLQEGNETLTAEVSIDRNPQSQGRKFNFILTSNQKTLTPEKGQSQG   | 398 |
| S. hondurensis   | 320 | FVVETQPCMPQTLHRPLILRTGSKFTVTRRLVRLQEGSESLTAEVFIDRNPQSQGRKFNFILTSNRKTLTPEKGQSQG   | 399 |
| A. jamaicensis   | 320 | FVVETQPCMPQTYHRPLILRTGSKFTVTRRLVRLQEGSESLTAEVFIDRNPQSQGRKFNFILTSNRKTLTPEKGQSQG   | 399 |
| P. discolor      | 317 | FVVETQPCMPQTPHRPLILRTGSKFTVTRRLVRLQEGSESLTAEVFIDRNPQSQGRKFNFILTSNQKTLTPEKGQSQG   | 396 |
| P. hasatus       | 317 | FVVETQPCMPQTPHRPLILRTGSKFTVTRRLVRLQEGSESLTAEVFIDRNPQSQGRKFNFILTSNRKTLTPEKGQSQG   | 396 |
| D. rotundus      | 318 | FVVETQPCMPQTPHRPLILRTGSKFTVTRRLVRLQEGSESLTAEVFIDRNPQSQGRKFNFILTSNQKTLTPEKGQSQG   | 397 |
| E. fuscus        | 318 | FVVETQPCMPQTPHRPLILRTGSKFTVTRRLVRLQEGSESLTAEVFIDKTPPQSQSFRKFNFILTSNQKTLTPEKGQSQG | 397 |
| H. armiger       | 318 | FVVENQPCMPQTPHRPLILRTGSKFTVTRRLVRLQEGNESLTAEVSIDRNPQSQGRKFNFILTSNQKTLTPEKGQSQG   | 397 |
| M. molossus      | 317 | FVVETQPCMPQTLHRPLILRTGSKFTVTRRLVRLQEGSESLTAEVFIDRNPQSQSFRKFNFILTSNQKTLTPEKGQSQG  | 396 |
| M. natalensis    | 317 | FVITETQPCMPQTPHRPLILRTGSKFTVTRRLVRLQEGSESLTAEVFIDRNPQSQGRKFNFILTSNQKTLTPEKGQSQG  | 396 |
| M. brandtii      | 318 | FVVETQPCMPQTPHRPLILRTGSKFTVTRRLVRLQEGSESLTAEVFIDKNPPQSQGRKFNFILTSNQKTLTPEKGQSQG  | 397 |
| M. lucifugus     | 318 | FVVETQPCMPQTPHRPLILRTGSKFTVTRRLVRLQEGSESLTAEVFIDKNPPQSQGRKFNFILTSNQKTLTPEKGQSQG  | 397 |
| M. myotis        | 318 | FVVETQPCMPQTPHRPLILRTGSKFTVTRRLVRLQEGSESLTAEVFIDKDPQSQGRKFNFILTSNQKTLTPEKGQSQG   | 397 |
| M. davidii       | 318 | FVVETQPCMPQTPHRPLILRTGTIKFTVTRRLVRLQEGSESLTAEVFIDKNPPQSQGRKFNFILTSNQKTLTPEKGQSQG | 397 |
| P. kuhlii        | 316 | FVVESSQPCMPQTPHRPLILRTGSKFTVTRRLVRLQEGSESLTAEVFIDKNPPQSQGRKFNFILTSNQKTLTPEKGQSQG | 395 |
| H. sapiens       | 316 | FVVETQPCMPQTPHRPLILKGTGSKFTVTRRLVRLQEGNESLTVESIDRNPQLQGRKFNFILTSNQKTLTPEKGQSQG   | 395 |

|                  |     |                                                                                      |     |
|------------------|-----|--------------------------------------------------------------------------------------|-----|
| P. alecto        | 396 | LIWDFS YLTLLVEQRSGSGSGKGNKGLLGVT EELHIISFTVKYTYQGLKQELKTD TLPVVIISNMNQLSIAWASVLWFNLL | 475 |
| P. giganteus     | 398 | LIWDFS YLTLLVEQRSGSGSGKGNKGLLGVT EELHIISFTVKYTYQGLKQELKTD TLPVVIISNMNQLSIAWASVLWFNLL | 477 |
| P. vampyrus      | 398 | LIWDFS YLTLLVEQRSGSGSGKGNKGLLGVT EELHIISFTVKYTYQGLKQELKTD TLPVVIISNMNQLSIAWASVLWFNLL | 477 |
| P. rodricensis   | 398 | LIWDFS YLTLLVEQRSGSGSGKGNKGLLGVT EELHIISFTVKYTYQGLKQELKTD TLPVVIISNMNQLSIAWASVLWFNLL | 477 |
| R. aegyptiacus   | 398 | LIWDFS YLTLLVEQRSGSGSGKGNKGLLGVT EELHIISFTVKYTYQGLKQELKTD TLPVVIISNMNQLSIAWASVLWFNLL | 477 |
| R. ferrumequinum | 399 | LIWDFGYLTLLVEQRSGSGSGKGSNKGLLGVT EELHIISITVKYTYQGLKQELKTD TLPVVIISNMNQLSIAWASVLWFNLL | 478 |
| S. hondurensis   | 400 | LIWDFRYLTLLTEQRSGSGSGKGSNKGLLGVT EELHIISFTVRYTYQGLKQELKTD TLPVVIISNTNQLSIAWASVLWFNLL | 479 |
| A. jamaicensis   | 400 | LIWDFRYLTLLTEQRSGSGSGKGSNKGLLGVT EELHIISFTVRYTYQGLKQELKTD TLPVVIISNTNQLSIAWASVLWFNLL | 479 |
| P. discolor      | 397 | LIWDFRYLTLLTEQRSGSGSGKGSNKGLLGVT EELHIISFTVKYTYQGLKQELKTD TLPVVIISNTNQLSIAWASVLWFNLL | 476 |
| P. hasatus       | 397 | LIWDFRYLTLLTEQRSGSGSGKGSNKGLLGVT EELHIISFTVKYTYQGLKQELKTD TLPVVIISNTNQLSIAWASVLWFNLL | 476 |
| D. rotundus      | 398 | LIWDFRYLTLLTEQRSGSGSGKGTNKSLLGVT EELHIISFTVKYTYQGLKQELKTD TLPVVIISNTNQLSIAWASVLWFNLL | 477 |
| E. fuscus        | 398 | LIWDFGYLTLLVEQRSGSGSGKGSNKGLLGVT EELHIISFTVQYTYQGLKQELKAD TLPVVIISNTNQLSIAWASVLWFNLL | 477 |
| H. armiger       | 398 | LIWDFGYLTLLVEQRSGSGSGKGSNKGLLGVT EELHIISITVKYTYQGLKQELKTD TLPVVIISNMNQLSIAWASVLWFNLL | 477 |
| M. molossus      | 397 | LIWDFGYLTLLVEQRSGSGSGKGSNKGLLGVT EELHIISFTVKYTYQGLKQELKTD TLPVVIISNMNQLSIAWASVLWFNLL | 476 |
| M. natalensis    | 397 | LIWDFGYLTLLVEQRSGSGSGKGSNKGLLGVT EELHIISFTVKYTYQGLKQELKTD TLPVVIISNMNQLSIAWASVLWFNLL | 476 |
| M. brandtii      | 398 | LIWDFGYLTLLVEQRSGSGSGKGSNKGLLGVT EELHIISFTVRYTYQGLKQELKAD TLPVVIISNMNQLSIAWASVLWFNLL | 477 |
| M. lucifugus     | 398 | LIWDFGYLTLLVEQRSGSGSGKGSNKGLLGVT EELHIISFTVRYTYQGLKQELKAD TLPVVIISNMNQLSIAWASVLWFNLL | 477 |
| M. myotis        | 398 | LIWDFGYLTLLVEQRSGSGSGKGSNKGLLGVT EELHIISFTVRYTYQGLKQELKAD TLPVVIISNMNQLSIAWASVLWFNLL | 477 |
| M. davidii       | 398 | LIWDFGYLTLLVEQRSGSGSGKGSNKGLLGVT EELHIISFTVRYTYQGLKQELKAD TLPVVIISNMNQLSIAWASVLWFNLL | 477 |
| P. kuhlii        | 396 | LIWDFGYLTLLVEQRSGSGSGKGSNKGLLGVT EELHIISFTVRYTYQGLKQELKAD TLPVVIISNMNQLSIAWASVLWFNLL | 475 |
| H. sapiens       | 396 | LIWDFGYLTLLVEQRSGSGSGKGSNKGLLGVT EELHIISFTVKYTYQGLKQELKTD TLPVVIISNMNQLSIAWASVLWFNLL | 475 |

\*Supplementary Figure 5 continues on next page

|                  |     |                      |                                                               |                              |                        |     |
|------------------|-----|----------------------|---------------------------------------------------------------|------------------------------|------------------------|-----|
| P. alecto        | 476 | SSNPQNQQFFSSPPKAPWS  | LLGPALSWQFL                                                   | SYVGRGLDQDQLNMLRDKLFEQKSKNED | ALLSWADFTKRESPPGKLPFWT | 555 |
| P. giganteus     | 478 | SSNPQNQQFFSSPPKAPWS  | LLGPALSWQFL                                                   | SYVGRGLDQDQLNMLRDKLFEQKSKNED | ALLSWADFTKRESPPGKLPFWT | 557 |
| P. vampyrus      | 478 | SSNPQNQQFFSSPPKAPWS  | LLGPALSWQFL                                                   | SYVGRGLDQDQLNMLRDKLFEQKSKNED | ALLSWADFTKRESPPGKLPFWT | 557 |
| P. rodricensis   | 478 | SSNPQNQQFFSSPPKAPWS  | LLGPALSWQFL                                                   | SYVGRGLDQDQLNMLRDKLFEQKSKNED | ALLSWADFTKRESPPGKLPFWT | 557 |
| R. aegyptiacus   | 478 | SSNPQNQQFFSSPPKAPWS  | LLGPALSWQFL                                                   | SYVGRGLDQDQLNMLRDKLFEQKSKNED | ALLSWADFTKRESPPGKLPFWT | 557 |
| R. ferrumequinum | 479 | TNPQNQQFFSSPPKAPWS   | LLGPALSWQFL                                                   | SYVGRGLDQDQLSMLKDKLFGKNCRNE  | ALLSWADFTKRESPPGKLPFWT | 558 |
| S. hondurensis   | 480 | SSNPQNQQFFSSPPKAPWS  | LLGPALSWQFL                                                   | SYVGRGLDQDQLSMLRDKLFGQNSGND  | ALLSWADFTKRESPPGKLPFWT | 559 |
| A. jamaicensis   | 480 | SSNPQNQQFFSSPPKAPWN  | LLGPALSWQFSSYVGRGLDQDQLSMLRDKLFGQNSGNEGAVLSWAE                | FTKRESPPGKLPFWT              | 559                    |     |
| P. discolor      | 477 | SSNPQNQLFFSSTPKAPWN  | LLGPALSWQFSSYVGRGLDQDQLSMLRDKLFGQNSGNEGALLSWADFTKRESPPGKLPFWT | 556                          |                        |     |
| P. hasatus       | 477 | SSNPQNQLFFSSPPKAPWN  | LLGPALSWQFSSYVGRGLDQDQLSMLRDKLFGQNSGNEGALLSWADFTKRESPPGKLPFWT | 556                          |                        |     |
| D. rotundus      | 478 | SSNPQNQQFFSSPPKAPWN  | LLGPALSWQFSSYVGRGLDQDQLSMLKDKLFGQNSGNEGALLSWADFTKRESPPGKLPFWT | 557                          |                        |     |
| E. fuscus        | 478 | SSNPQNQQFFSSPPKAPWT  | LLGPALSWQFSSYVGRGLDQDQLSMLKDKLFGQNSGNEGALLSWADFTKRESPPGKLPFWT | 557                          |                        |     |
| H. armiger       | 478 | TNPQNQQFFSSPPKAPWS   | LLGPALSWQFL                                                   | SYVGRGLDQDQLSMLKDKLFGKNCRNE  | ALLSWADFTKRESPPGKLPFWT | 557 |
| M. molossus      | 477 | SSNPQNQQFFSSPPKAPWN  | LLGPALSWQFSSYVGRGLDQDQLNMLRDKLFGQNSGNEGALLSWADFTKRESPPGKLPFWT | 556                          |                        |     |
| M. natalensis    | 477 | SSNPQNQQFFSSPPKAPWN  | LLGPALSWQFSSYVGRGLDQDQLSMLKDKLFGQNSGNEGALLSWADFTKRESPPGKLPFWT | 556                          |                        |     |
| M. brandtii      | 478 | SSNPQNQQFFSSPPKAPWT  | LLGPALSWQFSSYVGRGLDQDQLSMLKDKLFGQNSGNEGALLSWADFTKRESPPGKLPFWT | 557                          |                        |     |
| M. lucifugus     | 478 | SSNPQNQQFFSSPPKAPWT  | LLGPALSWQFSSYVGRGLDQDQLSMLKDKLFGQNSGNEGALLSWADFTKRESPPGKLPFWT | 557                          |                        |     |
| M. myotis        | 478 | SSNPQNQQFFSSPPKAPWT  | LLGPALSWQFSSYVGRGLDQDQLSMLKDKLFGQNSGNEGALLSWADFTKRESPPGKLPFWT | 557                          |                        |     |
| M. davidii       | 478 | SSNPQNQQFFSSPPKAPWT  | LLGPALSWQFSSYVGRGLDQDQLSMLKDKLFGQNSGNEGALLSWADFTKRESPPGKLPFWT | 557                          |                        |     |
| P. kuhlii        | 476 | SSNPQNQQFFSSPPKAPWA  | LLGPALSWQFSSYVGRGLDQDQLSMLKDKLFGQNSGSEGA                      | ALLSWADFTKRESPPGKLPFWT       | 555                    |     |
| H. sapiens       | 476 | SPNLPQNQQFFSSPPKAPWS | LLGPALSWQFSSYVGRGLDQDQLSMLRDKLFGQNCRTEDPL                     | ALLSWADFTKRESPPGKLPFWT       | 555                    |     |

|                  |     |                                       |                                      |        |     |
|------------------|-----|---------------------------------------|--------------------------------------|--------|-----|
| P. alecto        | 556 | WLDKILDLVHDHLKDLWNDGRIMGFVSRSQERLLKKT | ISGTFLRLFSETSEGGITCSWVEHQDDDKVLIYSVQ | PFTKEV | 635 |
| P. giganteus     | 558 | WLDKILDLVHDHLKDLWNDGRIMGFVSRSQERLLKKT | ISGTFLRLFSETSEGGITCSWVEHQDDDKVLIYSVQ | PFTKEV | 637 |
| P. vampyrus      | 558 | WLDKILDLVHDHLKDLWNDGRIMGFVSRSQERLLKKT | ISGTFLRLFSETSEGGITCSWVEHQDDDKVLIYSVQ | PFTKEV | 637 |
| P. rodricensis   | 558 | WLDKILDLVHDHLKDLWNDGRIMGFVSRSQERLLKKT | ISGTFLRLFSETSEGGITCSWVEHQDDDKVLIYSVQ | PFTKEV | 637 |
| R. aegyptiacus   | 558 | WLDKILDLVHDHLKDLWNDGRIMGFVSRSQERLLKKT | ISGTFLRLFSETSEGGITCSWVEHQDDDKVLIYSVQ | PFTKEV | 637 |
| R. ferrumequinum | 559 | WLDKILDLVHDHLKDLWKDGRIMGFVSRSQERLLKKT | ISGTFLRLFSETSEGGITCSWVEHQDDDKVLIYSVQ | PFTKEV | 638 |
| S. hondurensis   | 560 | WLDKILDLVHDHLKDLWKDGRIMGFVSRSQERLLKKT | ISGTFLRLFSETLEGGITCSWVEHQDDDKVLIYSVQ | PFTKEV | 639 |
| A. jamaicensis   | 560 | WLDKILDLVHDHLKDLWKDGRIMGFVSRSQERLLKKT | ISGTFLRLFSETLEGGITCSWVEHQDDDKVLIYSVQ | PFTKEV | 639 |
| P. discolor      | 557 | WLDKILDLVHDHLKDLWKDGRIMGFVSRSQERLLKKT | ISGTFLRLFSETLEGGITCSWVEHQDDDKVLIYSVQ | PFTKEV | 636 |
| P. hasatus       | 557 | WLDKILDLVHDHLKDLWKDGRIMGFVSRSQERLLKKT | ISGTFLRLFSETLEGGITCSWVEHQDDDKVLIYSVQ | PFTKEV | 636 |
| D. rotundus      | 558 | WLDKILDLVHDHLKDLWKDGRIMGFVSRSQERLLKKT | ISGTFLRLFSETSEGGITCSWVEHQDDDKVLIYSVQ | PFTKEV | 637 |
| E. fuscus        | 558 | WLDKILDLVHDHLKDLWNDGRIMGFVSRSQERLLKKT | ISGTFLRLFSETSEGGITCSWVEHQDDDKVLIYSVQ | PFTKEV | 637 |
| H. armiger       | 558 | WLDKILDLVHDHLKDLWNRGLIMGFVSRSQERLLKKT | ISGTFLRLFSETSEGGITCSWVEHQDDDKVLIYSVQ | PFTKEV | 637 |
| M. molossus      | 557 | WLDKILDLVHDHLKDLWNDGRIMGFVSRSQERLLKKT | ISGTFLRLFSETSEGGITCSWVEHQDDDKVLIYSVQ | PFTKEV | 636 |
| M. natalensis    | 557 | WLDKILDLVHDHLKDLWKDGRIMGFVSRSQERLLKKT | ISGTFLRLFSETSEGGITCSWVEHQDDDKVLIYSVQ | PFTKEV | 636 |
| M. brandtii      | 558 | WLDKILDLVHEHLKDLWNDGRIMGFVSRSQERLLKKT | ISGTFLRLFSETSEGGITCSWVEHQDDDKVLIYSVQ | PFTKEV | 637 |
| M. lucifugus     | 558 | WLDKILDLVHEHLKDLWNDGRIMGFVSRSQERLLKKT | ISGTFLRLFSETSEGGITCSWVEHQDDDKVLIYSVQ | PFTKEV | 637 |
| M. myotis        | 558 | WLDKILDLVHEHLKDLWNDGRIMGFVSRSQERLLKKT | ISGTFLRLFSETSEGGITCSWVEHQDDDKVLIYSVQ | PFTKEV | 637 |
| M. davidii       | 558 | WLDKILDLVHEHLKDLWNDGRIMGFVSRSQERLLKKT | ISGTFLRLFSETSEGGITCSWVEHQDDDKVLIYSVQ | PFTKEV | 637 |
| P. kuhlii        | 556 | WLDKILELVHDHLKDLWNDGRIMGFVSRSQERLLKKT | ISGTFLRLFSETAEGGVTCWVEHQDDDKVLIYSVQ  | PFTKEV | 635 |
| H. sapiens       | 556 | WLDKILELVHDHLKDLWNDGRIMGFVSRSQERLLKKT | ISGTFLRLFSETSEGGITCSWVEHQDDDKVLIYSVQ | PFTKEV | 635 |

|                  |     |                                  |                         |                                |     |       |  |
|------------------|-----|----------------------------------|-------------------------|--------------------------------|-----|-------|--|
|                  |     |                                  |                         |                                |     | pY690 |  |
| P. alecto        | 636 | LQSLPLTKIIRHYQLLTEENIPENPLCF     | FLYPRIPRDEAFGCYYEDKVNLE | ERRKYLKHKLIIVSNRQVDELQQLPEPNLE | 715 |       |  |
| P. giganteus     | 638 | LQSLPLTKIIRHYQLLTEENIPENPLCF     | FLYPRIPRDEAFGCYYEDKVNLE | ERRKYLKHKLIIVSNRQVDELQQLPEPNLE | 717 |       |  |
| P. vampyrus      | 638 | LQSLPLTKIIRHYQLLTEENIPENPLCF     | FLYPRIPRDEAFGCYYEDKVNLE | ERRKYLKHKLIIVSNRQVDELQQLPEPNLE | 717 |       |  |
| P. rodricensis   | 638 | LQSLPLTKIIRHYQLLTEENIPENPLCF     | FLYPRIPRDEAFGCYYEDKVNLE | ERRKYLKHKLIIVSNRQVDELQQLPEPNLE | 717 |       |  |
| R. aegyptiacus   | 638 | LQSLPLTKIIRHYQLLTEENIPENPLCF     | FLYPRIPRDEAFGCYYEDKVNLE | ERRKYLKHKLIIVSNRQVDELQQLPEPNLE | 717 |       |  |
| R. ferrumequinum | 639 | LQSLPLTKIIRHYQLLTEENIPENPLRFLYPR | IPRDEAFGCYYEDKVNLE      | ERRKYLKHKLIIVSNRQVDELQQLPEPNLE | 718 |       |  |
| S. hondurensis   | 640 | LQSLPLTKIIRHYQLLTEENIPENPLRFLYPR | IPRDEAFGCYYEDKVNLE      | ERRKYLKHKLIIVSNRQVDELQQLPEPNLE | 719 |       |  |
| A. jamaicensis   | 640 | LQSLPLTKIIRHYQLLTEENIPENPLRFLYPR | IPRDEAFGCYYEDKVNLE      | ERRKYLKHKLIIVSNRQVDELQQLPEPNLE | 719 |       |  |
| P. discolor      | 637 | LQSLPLTKIIRHYQLFTEENIPENPLCF     | FLYPRIPRDEAFGCYYEDKVNLE | ERRKYLKHKLIIVSNRQVDELQQLPEPNLE | 716 |       |  |
| P. hasatus       | 637 | LQSLPLTKIIRHYQLFTEENIPENPLCF     | FLYPRIPRDEAFGCYYEDKVNLE | ERRKYLKHKLIIVSNRQVDELQQLPEPNLE | 716 |       |  |
| D. rotundus      | 638 | LQSLPLTKIIRHYQLFTEENIPENPLCF     | FLYPRIPRDEAFGCYYEDKVNLE | ERRKYLKHKLIIVSNRQVDELQQLPEPNLE | 717 |       |  |
| E. fuscus        | 638 | LQSLPLTKIIRHYQLLTEENIPENPLRFLYPR | IPRDEAFGCYYEDKVNLE      | ERRKYLKHKLIIVSNRQVDELQQLPEPNLE | 717 |       |  |
| H. armiger       | 638 | LQSLPLTKIIRHYQLLTEENIPENPLRFLYPR | IPRDEAFGCYYEDKVNLE      | ERRKYLKHKLIIVSNRQVDELQQLPEPNLE | 717 |       |  |
| M. molossus      | 637 | LQSLPLTKIIRHYQLLTEENIPENPLCF     | FLYPRIPRDEAFGCYYEDKVNLE | ERRKYLKHKLIIVSNRQVDELQQLPEPNLE | 716 |       |  |
| M. natalensis    | 637 | LQSLPLTKIIRHYQLLTEENIPENPLCF     | FLYPRIPRDEAFGCYYEDKVNLE | ERRKYLKHKLIIVSNRQVDELQQLPEPNLE | 716 |       |  |
| M. brandtii      | 638 | LQSLPLTKIIRHYQLLTEENIPENPLRFLYPR | IPRDEAFGCYYEDKVNLE      | ERRKYLKHKLIIVSNRQVDELQQLPEPNLE | 717 |       |  |
| M. lucifugus     | 638 | LQSLPLTKIIRHYQLLTEENIPENPLRFLYPR | IPRDEAFGCYYEDKVNLE      | ERRKYLKHKLIIVSNRQVDELQQLPEPNLE | 717 |       |  |
| M. myotis        | 638 | LQSLPLTKIIRHYQLLTEENIPENPLRFLYPR | IPRDEAFGCYYEDKVNLE      | ERRKYLKHKLIIVSNRQVDELQQLPEPNLE | 717 |       |  |
| M. davidii       | 638 | LQSLPLTKIIRHYQLLTEENIPENPLRFLYPR | IPRDEAFGCYYEDKVNLE      | ERRKYLKHKLIIVSNRQVDELQQLPEPNLE | 717 |       |  |
| P. kuhlii        | 636 | LQSLPLTKIIRHYQLLTEENIPENPLRFLYPR | IPRDEAFGCYYEDKVNLE      | ERRKYLKHKLIIVSNRQVDELQQLPEPNLE | 715 |       |  |
| H. sapiens       | 636 | LQSLPLTKIIRHYQLLTEENIPENPLRFLYPR | IPRDEAFGCYYEDKVNLE      | ERRKYLKHKLIIVSNRQVDELQQLPEPNLE | 715 |       |  |

\*Supplementary Figure 5 continues on next page



|                  |     |                  |                                   |                                 |               |      |      |     |
|------------------|-----|------------------|-----------------------------------|---------------------------------|---------------|------|------|-----|
| P. alecto        | 716 | PEAESLELYPGLAEP  | --EPGLGLELEPLLKAGLDLGPPLERMLEPTPG | ---TVSQGMS                      | ELNLGPELKLEPI | LGPI | SQP  | 789 |
| P. giganteus     | 718 | PEAESLELYPGLAEP  | --EPGLGLELEPLLKAGLDLGPPLERMLEPTPG | ---TVSQGMS                      | ELNLGPELKLEPI | LGPI | SQP  | 791 |
| P. vampyrus      | 718 | PEAESLELYPGLAEP  | --EPGLGLELEPLLKAGLDLGPPLERMLEPTPG | ---TVSQGMS                      | ELNLGPELKLEPI | LGPI | SQP  | 791 |
| P. rodricensis   | 718 | PEAESLELYPGLAEP  | --EPGLGLELEPLLKAGLDLGPPLERMLEPTPG | ---TVSQGMS                      | ELNLGPELKLEPI | LGPI | SQP  | 791 |
| R. aegyptiacus   | 718 | LEVESSELYPGLAEP  | --DPGLGLELEPLLKAGLDLGPPLERMLEPTPG | ---TVSQGMS                      | ELNLGPELKLEPI | LEPI | SQP  | 791 |
| R. ferrumequinum | 719 | PEVESSELYPGLAEP  | --EPGLGLELEPLLKAGLDLGPPLERMLEPTPG | ---PTQSLPKP                     | NLGP          | ELT  | DP   | 779 |
| S. hondurensis   | 720 | PEVESLELSPGLAPGP | --EPGLGLELEPLLKAGLDLGPPLERMLEPTPG | ---VVQEP                        | NLGP          | ELT  | DP   | 785 |
| A. jamaicensis   | 720 | PEVESLELSPGLAPGP | --EPGLGLELEPLLKAGLDLGPPLERMLEPTPG | ---VVQEP                        | NLGP          | ELT  | DP   | 785 |
| P. discolor      | 717 | PEVESLELSPGLAPGP | --EPGLGLELEPLLKAGLDLGPPLERMLEPTPG | ---TVREP                        | NLGP          | ELT  | DP   | 782 |
| P. hasatus       | 717 | PEVESLELSPGLAPGP | --EPGLGLELEPLLKAGLDLGPPLERMLEPTPG | ---AVQEP                        | NLGP          | ELT  | DP   | 782 |
| D. rotundus      | 718 | PEVESLELSPGLAPGP | --EPGLGLELEPLLKAGLDLGPPLERMLEPTPG | ---VEQEP                        | NLGP          | ELT  | DP   | 783 |
| E. fuscus        | 718 | PEVESLELSPGLAPGP | --EPGLGLELEPLLKAGLDLGPPLERMLEPTPG | ---LDVVS                        | QRM           | PD   | LG   | 789 |
| H. armiger       | 718 | PEVESSELYPGLAEP  | --EPGLGLELEPLLKAGLDLGPPLERMLEPTPG | ---LTQ                          | RVP           | KP   | NL   | 782 |
| M. molossus      | 717 | PEVESLELSPGLAPGP | --EPGLGLELEPLLKAGLDLGPPLERMLEPTPG | ---LGRVS                        | QSV           | PE   | NL   | 794 |
| M. natalensis    | 717 | LEEDPSLEPP       | ---GP                             | EPGLGLELEPLLKAGLDLGPPLERMLEPTPG | ---FMSV       | SLI  | VE   | 790 |
| M. brandtii      | 718 | PEVEPLDLPGLAPGP  | --ELGLDLELEPLLKAGLDLGP            | ---PLEP                         | ---           | ELE  | LEPT | 783 |
| M. lucifugus     | 718 | PEVEPLDLPGLAPGP  | --ELGLDLELEPLLKAGLDLGP            | ---PLEP                         | ---           | ELE  | LEPT | 783 |
| M. myotis        | 718 | PEVEPLDLPGLAPGP  | --ELGLDLELEPLLKAGLDLGP            | ---ALEP                         | ---           | ELE  | LEPT | 786 |
| M. davidii       | 718 | PEVEPLDLPGLAPGP  | --ELGLDLELEPLLKAGLDLGP            | ---ALEP                         | ---           | ELE  | LEPT | 786 |
| P. kuhlii        | 716 | PEVESLELSPGLAPGP | --ELGLDLELEPLLKAGLDLGP            | ---                             | ---           | ---  | ---  | 773 |
| H. sapiens       | 716 | PEVESLELSPGLAPGP | --ELGLDLELEPLLKAGLDLGP            | ---                             | ---           | ---  | ---  | 785 |

|                  |     |         |      |                  |        |      |        |       |      |      |       |       |    |      |     |     |
|------------------|-----|---------|------|------------------|--------|------|--------|-------|------|------|-------|-------|----|------|-----|-----|
| P. alecto        | 790 | VPE     | --PD | --LPHDLEHLNTEEME | IFRNSM | NIED | IMPNGD | PLLAD | QNTV | DEAY | ILHPS | SHFHT | EG | PLIP | SDY | 855 |
| P. giganteus     | 792 | VPE     | --PD | --LPHDLEHLNTEEME | IFRNSM | NIED | IMPNGD | PLLAD | QNTV | DEAY | ILHPS | SHFHT | EG | PLIP | SDY | 857 |
| P. vampyrus      | 792 | VPE     | --PD | --LPHDLEHLNTEEME | IFRNSM | NIED | IMPNGD | PLLAD | QNTV | DEAY | ILHPS | SHFHT | EG | PLIP | SDY | 857 |
| P. rodricensis   | 792 | VPE     | --PD | --LPHDLEHLNTEEME | IFRNSM | NIED | IMPNGD | PLLAD | QNTV | DEAY | ILHPS | SHFHT | EG | PLIP | SDY | 857 |
| R. aegyptiacus   | 792 | VPE     | --PD | --LPHDLEHLNTEEME | IFRNSM | NIED | IMPNGD | PLLAD | QNTV | DEAY | ILHPS | SHFHT | EG | PLIP | SDY | 857 |
| R. ferrumequinum | 780 | VPEPE   | EP   | EP               | EP     | EP   | EP     | EP    | EP   | EP   | EP    | EP    | EP | EP   | EP  | 849 |
| S. hondurensis   | 786 | AP      | EP   | EP               | EP     | EP   | EP     | EP    | EP   | EP   | EP    | EP    | EP | EP   | EP  | 853 |
| A. jamaicensis   | 786 | AP      | EP   | EP               | EP     | EP   | EP     | EP    | EP   | EP   | EP    | EP    | EP | EP   | EP  | 853 |
| P. discolor      | 783 | AP      | EP   | EP               | EP     | EP   | EP     | EP    | EP   | EP   | EP    | EP    | EP | EP   | EP  | 850 |
| P. hasatus       | 783 | AP      | EP   | EP               | EP     | EP   | EP     | EP    | EP   | EP   | EP    | EP    | EP | EP   | EP  | 850 |
| D. rotundus      | 784 | AP      | EP   | EP               | EP     | EP   | EP     | EP    | EP   | EP   | EP    | EP    | EP | EP   | EP  | 851 |
| E. fuscus        | 790 | VPEPE   | EP   | EP               | EP     | EP   | EP     | EP    | EP   | EP   | EP    | EP    | EP | EP   | EP  | 857 |
| H. armiger       | 783 | VTE     | EP   | EP               | EP     | EP   | EP     | EP    | EP   | EP   | EP    | EP    | EP | EP   | EP  | 850 |
| M. molossus      | 795 | VPE     | --PD | --LPHDLEHLNTEEME | IFRNSM | NIED | IMPNGD | PLLAG | QNTT | DEAY | IFHT  | SHFY  | AD | GPL  | SP  | 860 |
| M. natalensis    | 791 | VPEPE   | PD   | --LPHDLEHLNTEEME | IFRNSM | NIED | IMPNGD | PLLAG | QNTT | DEAY | IFHT  | SHFY  | AD | GPL  | SP  | 858 |
| M. brandtii      | 784 | VPEPEPE | PD   | --LPHDLEHLNTEEME | IFRNSM | NIED | IMPNGD | PLLAG | QNTT | DEAY | IFHT  | SHFY  | AD | GPL  | SP  | 852 |
| M. lucifugus     | 784 | VPEPEPE | PD   | --LPHDLEHLNTEEME | IFRNSM | NIED | IMPNGD | PLLAG | QNTT | DEAY | IFHT  | SHFY  | AD | GPL  | SP  | 852 |
| M. myotis        | 787 | VPEPEPE | PD   | --LPHDLEHLNTEEME | IFRNSM | NIED | IMPNGD | PLLAG | QNTT | DEAY | IFHT  | SHFY  | AD | GPL  | SP  | 855 |
| M. davidii       | 787 | VPEPEPE | PD   | --LPHDLEHLNTEEME | IFRNSM | NIED | IMPNGD | PLLAG | QNTT | DEAY | IFHT  | SHFY  | AD | GPL  | SP  | 853 |
| P. kuhlii        | 774 | MP      | EA   | EP               | ES     | DL   | PH     | DL    | RHLN | TE   | EME   | IF    | FN | ---  | --- | 840 |
| H. sapiens       | 786 | VPE     | --PD | --LPHDLEHLNTEEME | IFRNSM | NIED | IMPNGD | PLLAG | QNTT | DEAY | IFHT  | SHFY  | AD | GPL  | SP  | 851 |

**Supplementary Figure 5. Bat STAT2 multiple sequence alignment.** Grey boxes indicate identical residues. Purple box highlights region surrounding the tyrosine phosphorylation site in humans. ClustalW alignment was generated using MacVector software. Human sequence was included for comparison.

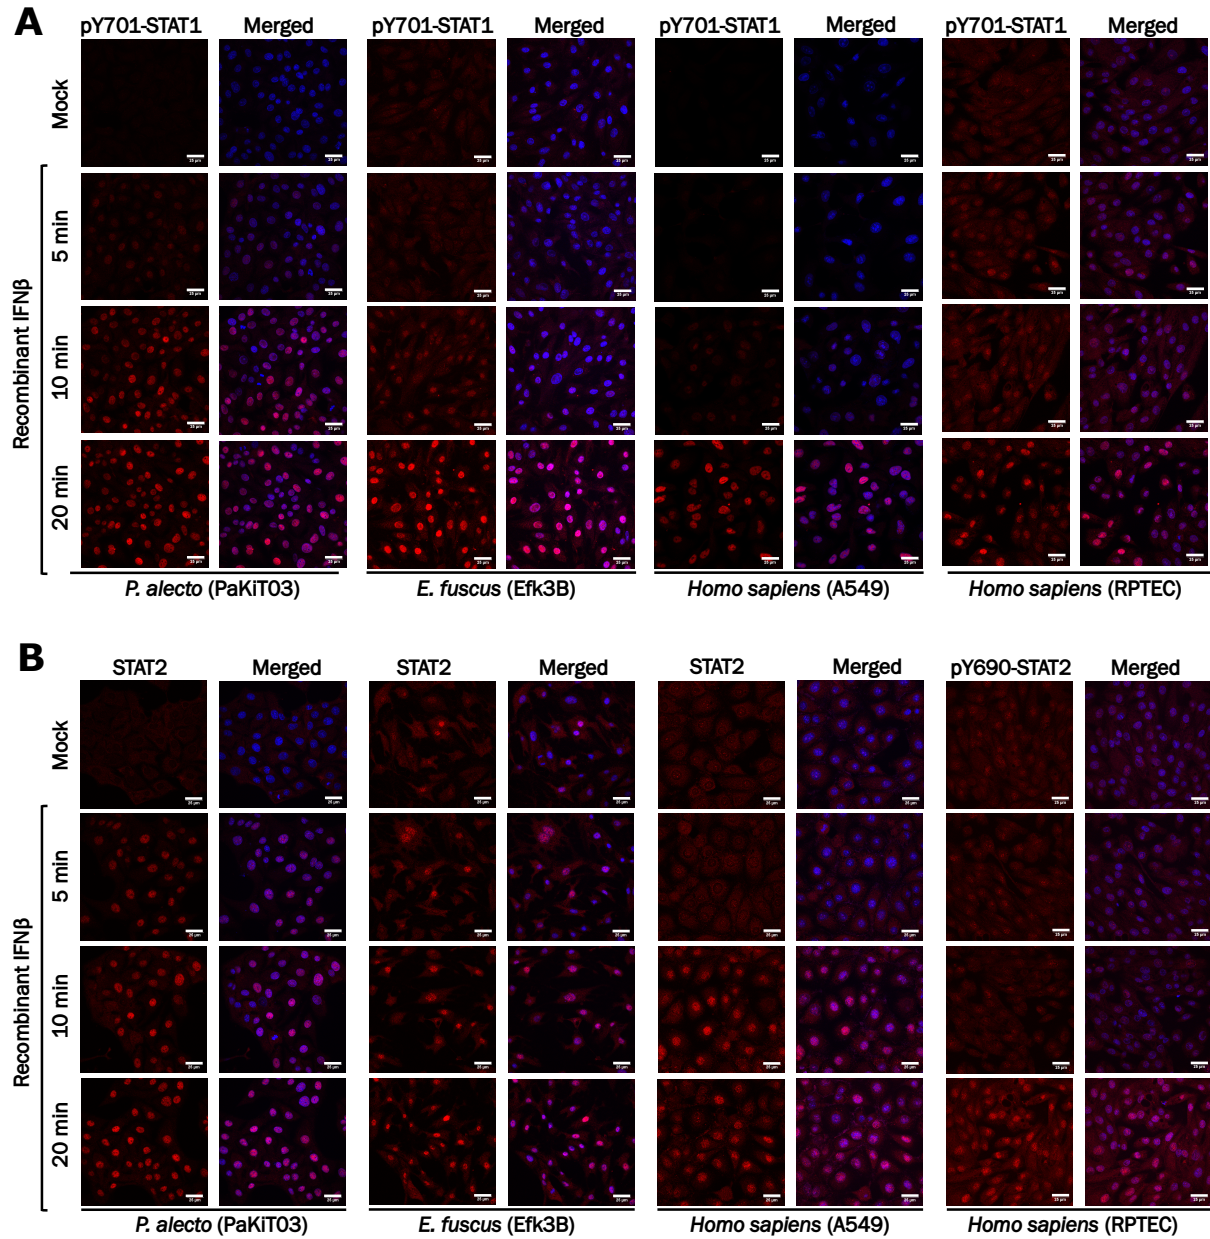

**Supplementary Figure 6. Nuclear translocation of STAT1 and STAT2.** *P. alecto* (PaKIT03), *E. fuscus* (EfK3B), and human A549 and RPTEC cells were treated for 5, 10, and 20 minutes with species matched IFN $\beta$  (10 U/mL) or with the vehicle control. Cells were stained for pY701-STAT1 (**A**), pY690-STAT2 or STAT2 (**B**), and DAPI. Nuclear translocation of stained proteins was visualized by confocal microscopy. Scale bars = 25  $\mu$ m. Image is representative of 3 replicates.

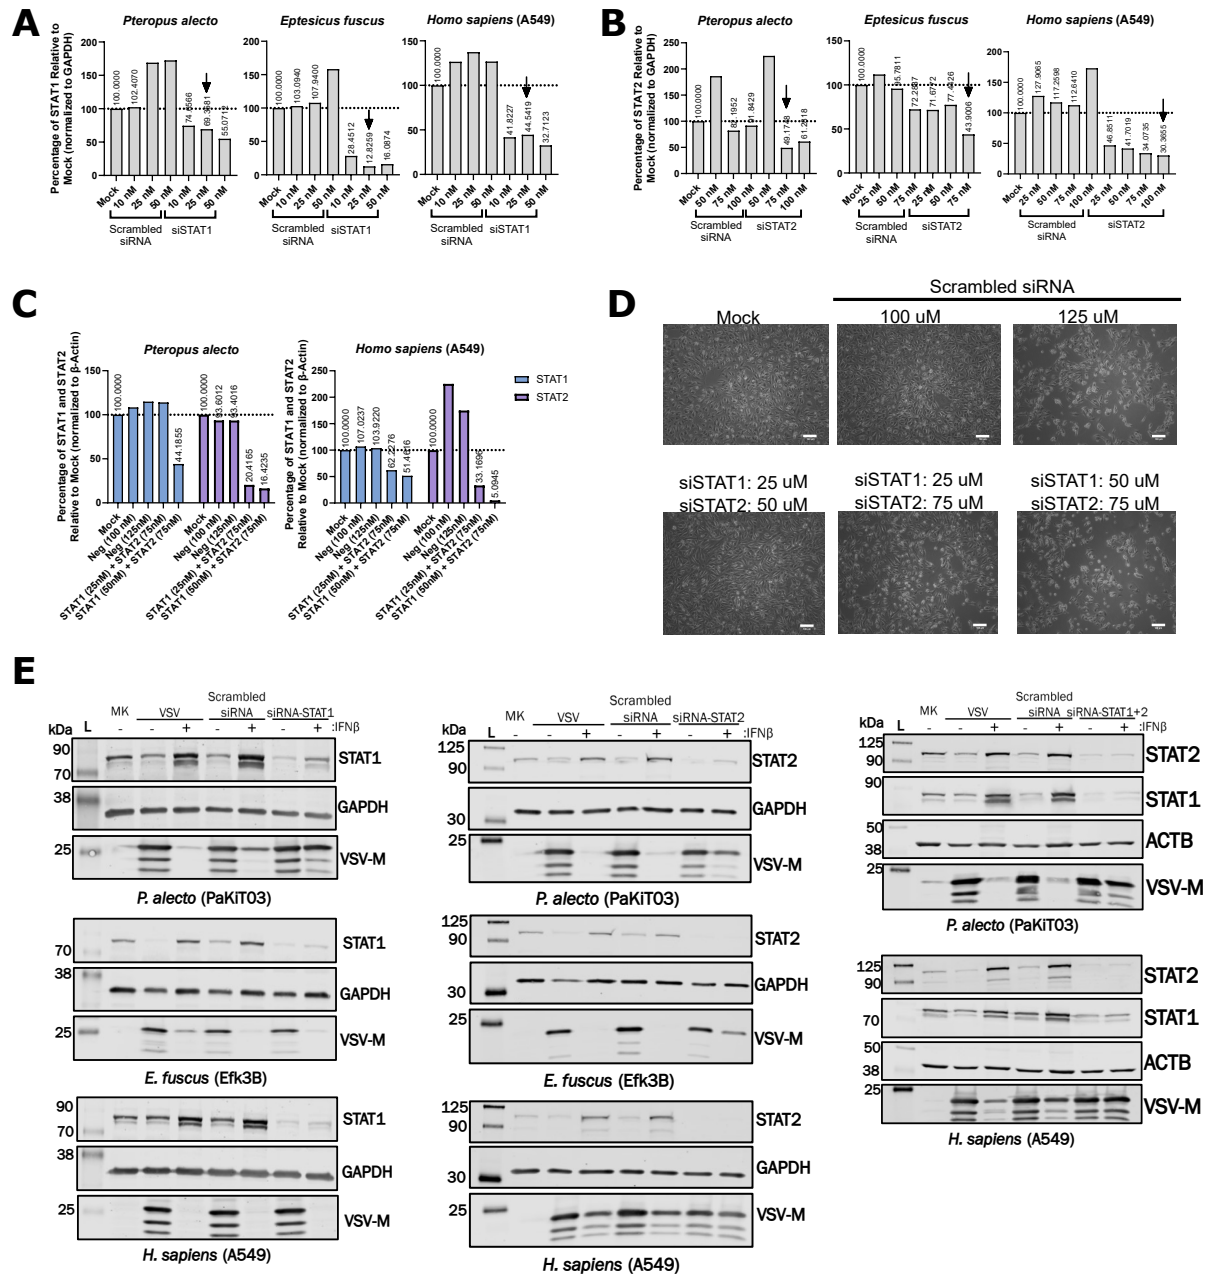

**Supplementary Figure 7. siRNA-mediated knockdown of STAT1 and STAT2.** *P. alecto* (PaKiT03), *E. fuscus* (EfK3B), and human A549 cells were transfected 4 hours post seeding with various concentrations of siRNA targeting STAT1 (A) and STAT2 (B) individually, and in combination to achieve a double knockdown (C). (A-C) Forty-eight hours later, protein lysates were harvested and STAT1, STAT2, GAPDH, and/or  $\beta$ -actin levels were quantified by immunoblotting. (D) Brightfield images of EfK3B cells transfected with siSTAT1 and siSTAT2 at concentrations where single knockdowns were achieved. Scale bars = 100  $\mu$ M. (E) PaKiT03, EfK3B, and human A549 cells were transfected with siRNA-STAT1 (25 nM), siRNA-STAT2 (75 nM), a combination of both siRNAs (STAT1, 25nM; STAT2, 75nM), or with the scrambled siRNA (control) 4 hours post

seeding cells. After 48 hours, cells were treated with species-matched IFN $\beta$  (10 U/mL) for 6 hours, followed by infection with VSV-GFP (MOI 0.1) for 16 hours. Cell lysates were harvested and assessed by immunoblotting for VSV-M, GAPDH,  $\beta$ -actin, STAT1 and/or STAT2. Immunoblots are representative of 3 replicates.

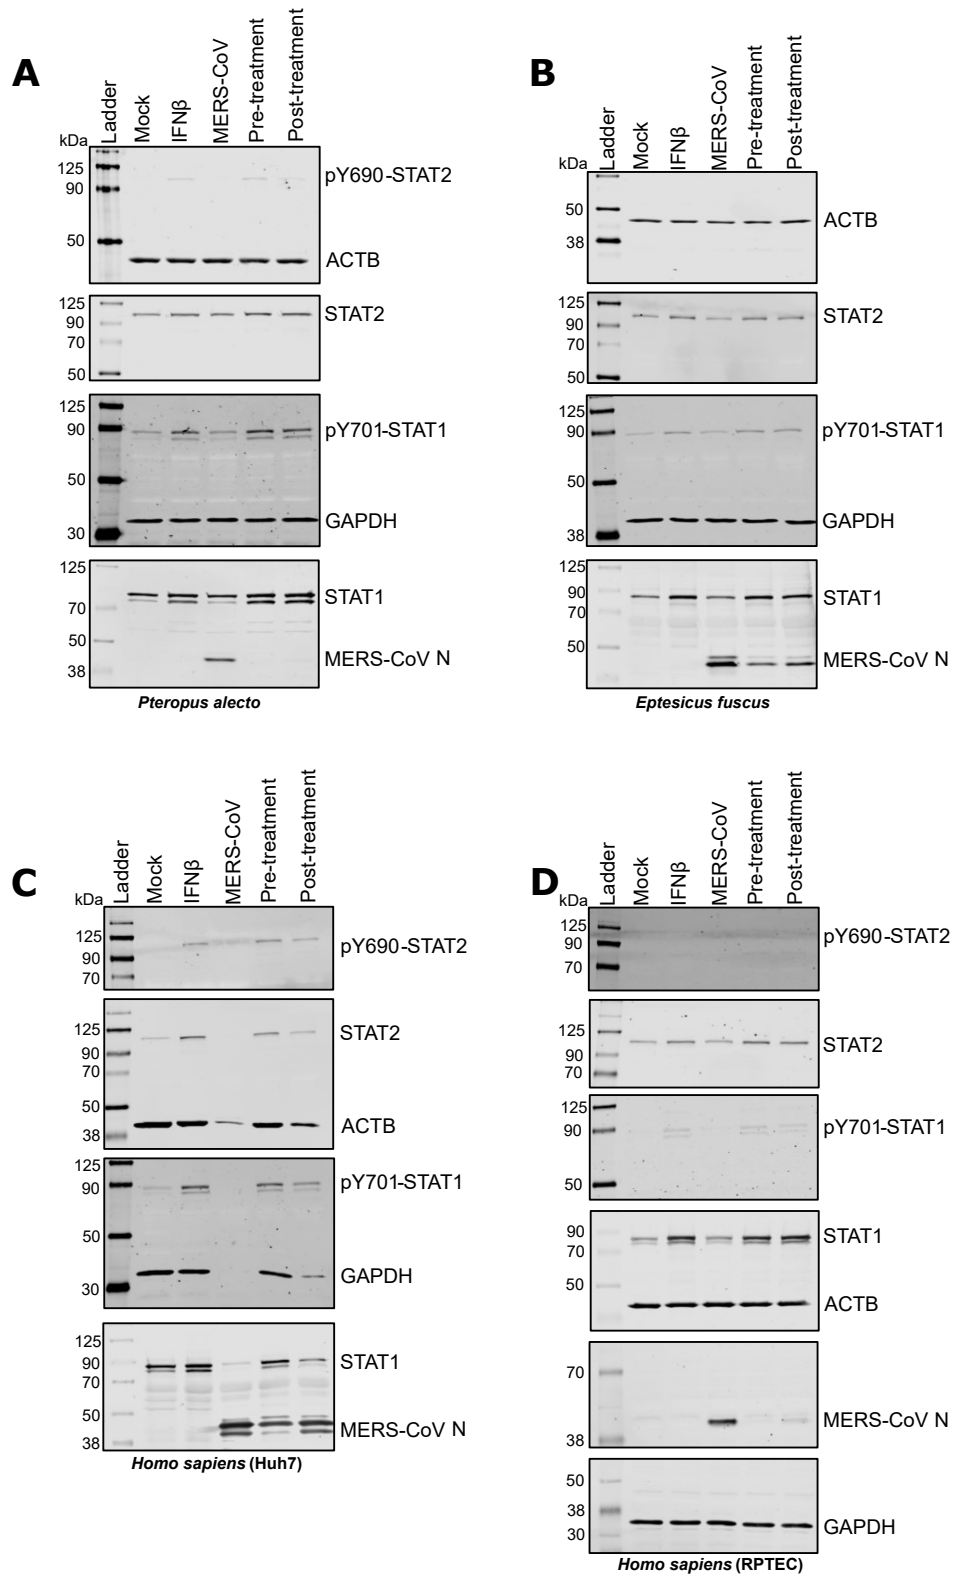

**Supplementary Figure 8. Full immunoblots of IFN $\beta$  treatment and MERS-CoV infection.** PaKiT03 (A), Efk3B (B), Huh7 (C), and RPTEC (D) cells were pretreated with

species-matched IFN $\beta$  for 6 hours prior to infection with MERS-CoV or received IFN $\beta$  treatment following infection with MERS-CoV (MOI 0.1) for 48 hours. Protein lysates were harvested and probed for total STAT1 and STAT2, pY701-STAT1, pY690-STAT2, MERS-CoV nucleoprotein (N), GAPDH, and  $\beta$ -actin by immunoblotting.

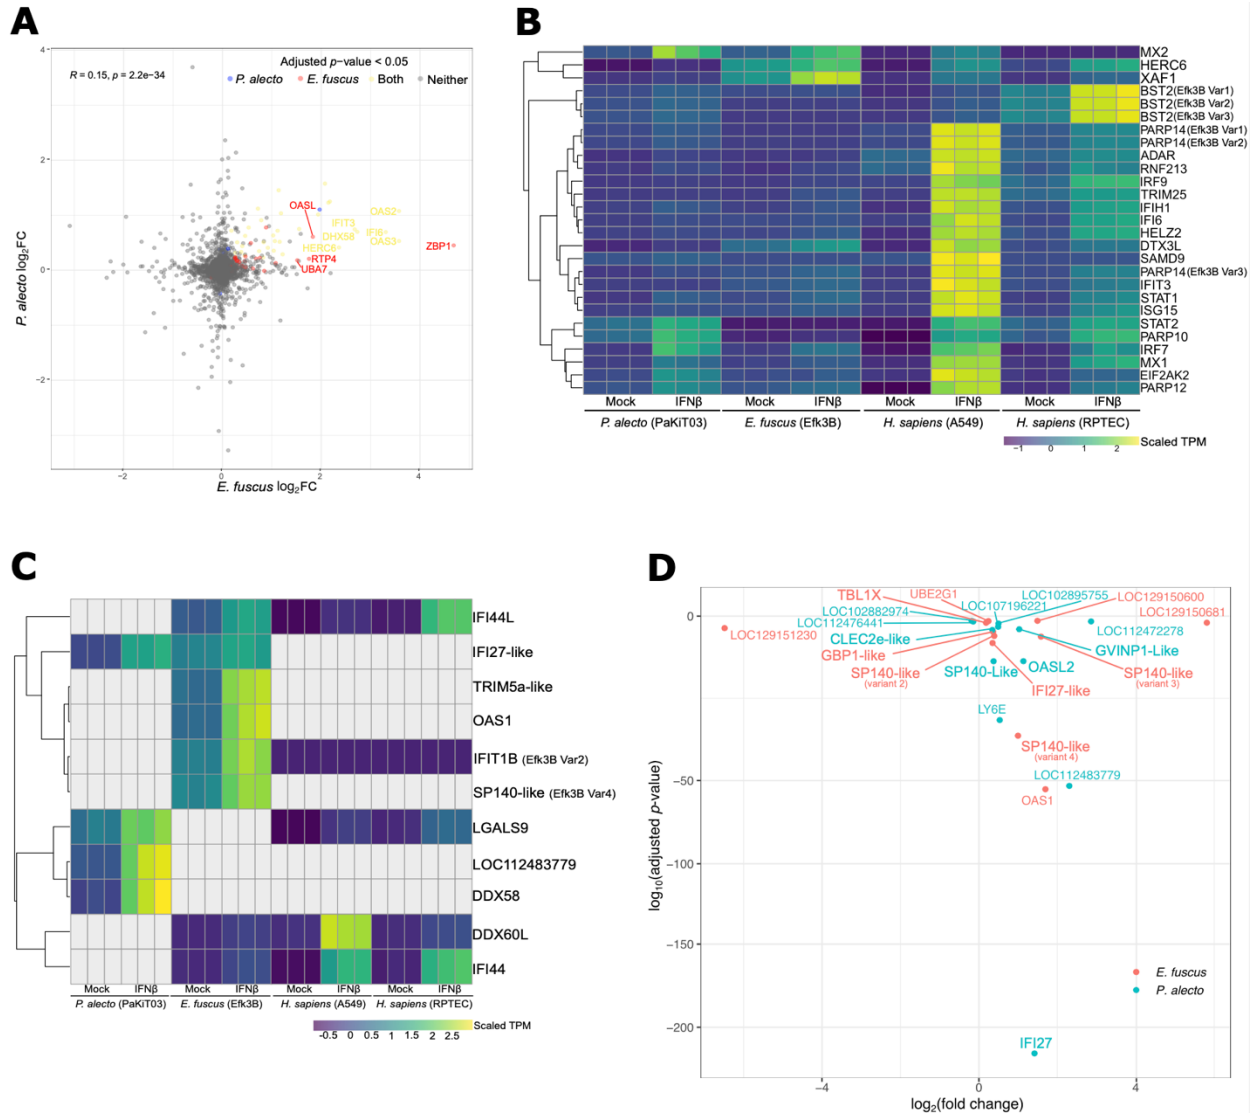

**Supplementary Figure 9. Host transcriptional response to IFN $\beta$  stimulation. (A)** Function enrichment plot for differentially expressed genes (DEGs) in PaKiT03 and EfK3B cells. **(B)** Heatmap indicating the expression levels of the top 27 bat DEGs involved in the IFN $\beta$  response in PaKiT03, EfK3B, A549, and RPTEC cells, ranked by  $p$ -value. *E. fuscus* transcript variants are indicated in brackets (i.e. var1) and are plotted against the transcript levels of a single variant that was detected in PaKiT03, A549, and RPTEC cells. **(C)** Heatmap indicating the expression levels of genes that do not exist in all four cell lines but were significantly differentially expressed in at least one cell line. ‘LOC’ symbol represents genes that do not have a published symbol and orthologs that have not yet been determined or named. **(D)** Top upregulated genes in PaKiT03 and EfK3B cells, orthologues for which were not clearly identifiable within the human genome or orthologous genes were not upregulated upon IFN $\beta$  stimulation of human cells. Paralogs are indicated (i.e. var1). See **Supplementary Table S7** for the representative LOC symbol.

LOC103296399 1 ATGGAGCCCTGGGAGGTGCTCTACGATAATGAATCAGGAACACGTGGGGATAACATTTCACTACTCAGAGTTCTGGCTTC 80  
 LOC103300075 1  
 H. sapiens IFIT1B 1 0

LOC103296399 81 ATTTCCAAATGCTCCTGAAAACTACATAATAATTACTGTCTCTTTTACAGTGTGAAT-TAAATGACAAATCTATTGAG 159  
 LOC103300075 1 - - - - - ATGAGTATGAATGCTGATGAAGATCAGATCCAA 33  
 H. sapiens IFIT1B 1 - - - - - ATGAGTGAAGAATCTGATGAAAGCTTATTGAA 33

LOC103296399 160 GACAACCTTGTTCACCTGAGATGTCACCTTACCTGGAAGCTGCACATTGAAGACACTGAACTGCAAGATTTAGAAAAACAG 239  
 LOC103300075 34 GCTAGGCTGGAACAGCTGAGATGTCACCTTACATGGAAGTTGACACATTGAAGACACTGAACTGCTGTATTAGAAAAACAG 113  
 H. sapiens IFIT1B 34 GACAGCTGGAATTCAGCTGAGATGTCACCTTACATGGAAGTTGTTAATTGAAGCCCTGAAATCTGTATTAGAAAAACAG 113

LOC103296399 240 GGTCTTGGATCAGATTGAGTTCCTAGAGCACAACTTCAATGTGGGCATACACAACCTACTGGCCTATGTGAAACACCTGA 319  
 LOC103300075 114 GGCTCTTGTATGCAATTGAGTTCCTAGACACAAAACTTCAATGTGGGCATACACAACCTACTGGCCTATGTGAAACACCTGA 193  
 H. sapiens IFIT1B 114 GATCTGGAGAGAGATTCAGTTCTTCGACACCAAAATCAATGTGGGAATACACAACCTACTAGCCTATGTGAAACACCTGA 193

LOC103296399 320 ATGGCCAGAATCAGGAAGCCCTGGAGAGCTTGAAAGGAAGCTGAAGACTTAATGCAGGCAGGCACATCCGCCAGTCAGAC 399  
 LOC103300075 194 ATGGCCAGAATCAGGAAGCCCTGAAGAGCTTGAAAGGAAGCTGAAGACTTAATGCAGGCAGGAACATGTTGCCAGTCAGAC 273  
 H. sapiens IFIT1B 194 AAGGCCAGAATCAGGAAGCCCTGCTAGCTTGAAAGAGGCTGAAGACTTAATTCAGAAAGAACATGCCAACCAAGCAGAT 273

LOC103296399 400 GCGATAAAGCTGGTTACCTGGGGCAACTATGCCTGGCTGTATTACCACATGGACAGGCTGGCGGACGCCAGATTACCT 479  
 LOC103300075 274 GCGATAAAGCTGGTTACCTGGGGCAACTATGCCTGGCTGTATTACCACATGGACAGGCTGGCGGACGCCAGATTACCT 353  
 H. sapiens IFIT1B 274 ATTCAGAGTCTGGTTCACCTGGGGCAACTTTCCTGGCTGTATTACCACATGGCAGATTTGGCAAGACCCAGACTTACCT 353

LOC103296399 480 GGACAAGGTGGAGAGCACTTGCAAAAAGTTTCCAGCCCTCCTGCTACACAATGGAGTGGCCTGAGATGGACTGTAAAG 559  
 LOC103300075 354 GGACAAGGTGGAGAGCACTTGCAAAAAGTTTCCAGCCCTCCTGCTACACAATGGAGTGGCCTGAGATGGACTGTGCCG 433  
 H. sapiens IFIT1B 354 GGACAAGGTGGAGAAACACTTGCAGCAAGTTTGCAGATCTTCCCTCTATGAAGATGGAGTTCAGAGGCTGGACTGTGAGG 433

LOC103296399 560 AAGGATGGGCCTTGTGAAATGTGGAGGAAAGAATTACGAACGGCTAAAGCCTGCTTTGAGAAGGCTCTGGAAGTGGAC 639  
 LOC103300075 434 AAGGATGGGCCTTGTGAAATGTGGAGGAAAGAATTATGAACGGGCTAAAGCCTGCTTTGAGAAGGCTCTGGAAGTGGAC 513  
 H. sapiens IFIT1B 434 AAGGATGGGCCTTGGGAAGTGTGGTGGAAAGAATTATGAACGGGCTAAAGCCTGCTTTGAAGAAGGCTCTGGAAGTGGAC 513

LOC103296399 640 CCTGAAAACCTGAAATTCAGCACTGGGTATGCAATTTGTGTCTATCGTCTGGATGGCTTTAAACAAAACACCACCTCTCTCG 719  
 LOC103300075 514 CCGTAAAACCTGAAATTCAGCACTGGGTATGCAATTTGTGTCTTTCGTCTGGATGGCTTTAAACAAAACACCACCTGTTTGA 593  
 H. sapiens IFIT1B 514 CCGTAAAACCTGAAATTCATTACTGGGTACGCAATCACCCTCTATCCCTCTGGATAAATTTAACAACCAATCAGGAGGAA 593

LOC103296399 720 TAAGACATTTTGTGTGACAGCCCTTAAACCGGGCCATCAGGCTAAATCCAGGAGATGGGTATATTAAGTGTCTCTCTCGGCA 799  
 LOC103300075 594 TGAGGCATTTTGTGTGACAGCCCTTAAACCGGGCCATCAGGCTAAATCCAGAGATGCATATTAAGGCTCTCTCTTGGTGTG 673  
 H. sapiens IFIT1B 594 TAAGGCATTTTCTCTGCACTGCTTAAACAGAGTGTTCAGGCTAAATCCAGATGATGTATATATTAAGGCTCTCTCTTGGCT 673

LOC103296399 800 TGAAACTTCAGAAATATAGGACAACGAAGCTGAGGGAGAAAAGTACATTGAAGAAGCACTGGCCAACATGTCTTCGAGGCC 879  
 LOC103300075 674 TGAAACTTCAGGAGATAGGACAAGGAAGCTGAGGGAGAAAAGTACATTGAAGAAGCACTGGCCAACATGTCTTCGAGAGCT 753  
 H. sapiens IFIT1B 674 TGAACTTCAGGATGAGGACAAGGAAGCTGAGGAGAAAAGTACATTGAAGAAGCTGTGACCAAGTATATCTTCACAGGCC 753

LOC103296399 880 TATGTCCTTCGATATGCGGCCAAGTTTACCGAAAAGGGCTCTTTAGCTTAAAGCTCTTCAGCTCTTAAAAATGGCTTT 959  
 LOC103300075 754 TATGTCCTTCGATATGCGGCCAAGTTTACCGAAAAGGGCTCTTTAGCTTAAAGCTCTTCAGCTCTTAAAAATGGCTTT 833  
 H. sapiens IFIT1B 754 TATGTCCTTTCATATATGCAAGCAAGTTTATCGAAAGAAAAGGCTCTCTGAGTAAAGCTCTTCAGCTCTTAAAAATGGCTTT 833

LOC103296399 960 GCAGGCAACACCTTCTCTGCTCTCTGTCATCACCAGATAGGGCTTTGCTATAGAGCACAAAGTCCATAAAAATAACAAAG 1039  
 LOC103300075 834 GCGGGCAACACCTTCTCTGCTCTCTGTCATCACCAGATAGGGCTTTGCTACAGATCACAAACATATCTTAATAAACAAAG 913  
 H. sapiens IFIT1B 834 GGAGCAACACACCTCTCTGCTCTCTGTCATCACCAGATAGGGGCTTTGCTACAGGGCACAAATGATCCAAATCAAGGAAG 913

LOC103296399 1040 CTACAACTGGGAGCCTAGAGGACCGGATAGAGAAAATATCGACAGAATAACAAAATTAGCCATATCTCATTTTGAATTT 1119  
 LOC103300075 914 CTTCAAACTGGGAGCCTAGAGGACCGGATAGAGAAAATATCGACAGAATAACAAAATTAGCCATATCTCATTTTGAATTT 993  
 H. sapiens IFIT1B 914 CTACAACTGGGAGCCTAGAGGACCAAGATAGGAAACTGTTGACAGATTGGTTCAATTGGCTATATGCAATTTGAAAG 993

LOC103296399 1120 GCTGTGGAACAAAAGCCAACATTGGAAGTTGCTTATACACACCTAGCAGATATGTAATTCATTTGCAGGCAATAGCAGAAA 1199  
 LOC103300075 994 GCTGTGGAACAAAAGCCAACATTGGAATTTGCTTATATACACCTAGCAGATATGTAATTCATTTGCAGGCAACATAGAAA 1073  
 H. sapiens IFIT1B 994 ACTATTAATGTTAAAGGCAACATTGGAAGTGTGCTATGTTGACCTGGCTGAATCCTATGCAAGAAATAGGCCAGCAGCAAAA 1073

LOC103296399 1200 AGCTGAAGAGACTTATCAAAAAGTGTCTGTCATGAAATCAACTGAAGAAGAAAATAATGCAAGAGATATATTCCAGCAAG 1279  
 LOC103300075 1074 AGCTGAAGAGACTTATCAAAAAGTGTCTGTCATGAAATCACTGAAGAAGAAAATAATGCAAGAGATATATTACCTGCTATG 1153  
 H. sapiens IFIT1B 1074 GGCTGAGGACATTTTCAGAAAAGGTTTACGTCATGAAGATCTTTGAAGATCAGCTAAAGCAAGAGATTCATTACCACTACG 1153

LOC103296399 1280 GTCGATTTTCAGGAATTTAAAGGAAATCTGAAGTCGATGCAATTTATCTATTATTTAAAAAGCAATCAAAATAGAAAAAGCCA 1359  
 LOC103300075 1154 GTCGATTTTCAGGAATTTCAAGGAAATCTGAAGTCGATGCAATTTATCTATTATTTAAAAAGCAATCAAAATTAAGAAAAAGCCA 1233  
 H. sapiens IFIT1B 1154 GCCCTTTTCAGAAACATCTGGGAAATCTCAAGATAAAGCAATTACCTATTATTTAAAAAGGTTTGAAGAAATAGAAAAATG 1233

LOC103296399 1360 TCATCTGTAAAGAGACAGAAGTATCACTTCTCTGGAGAGAGTGGTTTTAAGGAAAACCTCAAAAGAAACCCAGTAGACATAGA 1439  
 LOC103300075 1234 TC - - - - - CTAAGAGACAGAAGTATCAATCTCTGGAGAGAGTGGTTTTAAAGAAACCTCAAAAGAAACCCAGTAGACATAGA 1310  
 H. sapiens IFIT1B 1234 TCCTATTCAGGGAAGAACTTCTCAATGCTTTAGAGAAATTTGGCTAAAGATGTATTCACCAAGATGTATCGGCTTGTGGA 1313

LOC103296399 1440 AAGCTTGAGCATCCTTGGGTTACCTACAAAATTGAAAGGAGAAAATGAATAAAGCCCTGGAGTACTATGAGCGGGCCCTGA 1519  
 LOC103300075 1311 AAGCTTGAGCATCCTTGGGTTACCTACAAAATTGAAAGGAGAAAATGAATAAAGCCCTGGAGTACTATGAGCGGGCCCTGA 1390  
 H. sapiens IFIT1B 1314 AAGTGTTCAGCTTCCTTGGGCTTATTCACAAAATTGAAAGGAGAAAATGAATGATGCTTTGCTGTCTATGAGAGGGGCTCTGA 1393

LOC103296399 1520 GGCTGGCTGCTGACTTTGAGAACCTGTGGGACACGCTCCTTAG 1563  
 LOC103300075 1391 GGCTGGCTGCTGACTTTGAGAACCTGTGGGACACGCTCCTTAG 1434  
 H. sapiens IFIT1B 1394 GGCTGGCTGCTGACCTT - - - GAACCTTATTTTAA 1425



**Supplementary Figure 10. Gene alignment of *E. fuscus* and human *IFIT1B*.** Grey boxes indicate identical residues. ClustalW alignment was generated using MacVector software. Two uncharacterized genes (LOC103296399 and LOC103300075) were identified to be orthologous to human *IFITB*.

P. alecto IFIT1 1 ATGAGTAA GAATGCTGATGAAGATCAGGTCAAAGATAGGCTGGAGCAATGAGATGTCACTTTACATGGAAGTTGCTAAT 80  
 H. sapiens IFIT1 1 ATGAGTAA GAATGCTGATGATATCAGGTCAAAGATAGTCTGGAGCAATGAGATGTCACTTTACATGGAAGTTATCCAT 80

P. alecto IFIT1 81 CGAAGACACTGAAATTAACGATTAGAAAACAGGGTTTTCGATGAGATTGAATTCCTAGACATCAAATACACGTGGGAA 160  
 H. sapiens IFIT1 81 TGATGACGATGAAATGCCGTGATTTAGAAAACAGAGTCTTGATCAGATTGAATTCCTAGACATCAAATACAGTGTGGGAA 160

P. alecto IFIT1 161 TTTACCAACCTACTGCCTATATTAAGCACCTGAAAGGCCAAATAGGAAGCCCTGAGAGCTTGAAGAAGCTGAAACC 240  
 H. sapiens IFIT1 161 TACCAACCTACTAGCCTATGTGAAACACCTGAAAGGCCAAGATAGGAAGCCCTGAGAGCTTGAAGAAGCTGAAACC 240

P. alecto IFIT1 241 TTAATCAGCAAGAAGCTTACCAACCAATCGAACACAAAGAGCTGGTTACCTGGGGCAACTATGCCTGGCTGTATTACCA 320  
 H. sapiens IFIT1 241 TTAATGCAAGGAAGAACATGACCAACCAAGCAATGTGAGGAGCTGGTTACCTGGGGCAACTATGCCTGGATGTATTACCA 320

P. alecto IFIT1 321 CATGGGCAGCTGGCGAGAAGTCCAGATTATCTGGACAAAGTGGAAACACTTGCAAGAAGCTTGCAGTCCCTCTCGCT 400  
 H. sapiens IFIT1 321 CATGGGCAGACTGGCGAGAAGCCAGACTTATCTGGACAAAGTGGAAACACTTGCAAGAAGCTTCAATCCCTCTCGCT 400

P. alecto IFIT1 401 GTAGACTGGAGTGTCTGAGATGGACTGTGAGGAAGGATGGCCCTTGCTGAAATGTGGAGGAAAGAAATTCGAACGACGCC 480  
 H. sapiens IFIT1 401 ATAGAAATGGAGTGTCCAGAAATGACTGTGAGGAAGGATGGCCCTTGCTGAAATGTGGAGGAAAGAAATTCGAACGAGGCC 480

P. alecto IFIT1 481 AAGGCCTGCTTTGAAAAGGCTCTGGAAGCGGACCCTGAAAACCTCGAATTCAACCTGGGTATGCGATCACTATGTTTCG 560  
 H. sapiens IFIT1 481 AAGGCCTGCTTTGAAAAGGTGCTTGAAAGTGGACCCTGAAAACCTCGAATCCAGCGCTGGGTATGCGATCTGTGCTTATTCG 560

P. alecto IFIT1 561 TCTGGATAGCTTTTCAAAAGAAAGCGCAATTTAAAGAGCCATTTTCTCTACACCCCTAAAGCAGGCATCAAGCTTAAATC 640  
 H. sapiens IFIT1 561 CTTGGATGCTTTTCAAAAGAAAGCAAAATTCACAGCCATTTTCTTTGCTTCCCTAAAGCAGGCTGTGCTTAAATC 640

P. alecto IFIT1 641 CCGAAGATGCATATATTAAGGCTCTCCTTGGCCTGAAGCTTCAGGATGAGGAACAAGCTGAGGACAAAAGTACATT 720  
 H. sapiens IFIT1 641 CAGACAATGCATATATTAAGGCTCTCCTTGGCCTGAAGCTTCAGGATGAGGAACAAGCTGAGGACAAAAGTACATT 720

P. alecto IFIT1 721 GAAGAAGCACTGACCAAAATGTGCTGCAGACCTATGCTTTTCGTATGCAGCCATGTTTTACCGAAGAAAAGGCTCTGT 800  
 H. sapiens IFIT1 721 GAAGAAGCTCTAGCCAAATGTGCTGCAGACCTATGCTTTTCGATATGCAGCCATGTTTTACCGAAGAAAAGGCTCTGT 800

P. alecto IFIT1 801 GGATAAAGCGCTTCAGCTCTTAAAAAAGCTTTGCGAGCAACACCCTCTTCTGCTTCTCATCACCAGATAGGGCTTT 880  
 H. sapiens IFIT1 801 GGATAAAGCTCTTCAGTATTAATAAAAAGGCTTTGCGAGCAACACCCTCTTCTGCTTCTCATCACCAGATAGGGCTTT 880

P. alecto IFIT1 881 GCTACAGATCACAAATTCGTCAAATAAGAAAGCTGCAAAATGGCAGCCTAGAGGACAGATAGAGAAAAATGTAATAGA 960  
 H. sapiens IFIT1 881 GCTACAGGACAAATTCATCAAAATCAAGGAGGCTACAAAAGGCAGCCTAGAGGACAGAACAGAGAAAAATGTAACAAA 960

P. alecto IFIT1 961 ATAAACAGATTAGCCATATTTCAATTTGAATTCAACCTGAACAAAAGCCACATTTGAGATTAGCTTACAAACACCTGGC 1040  
 H. sapiens IFIT1 961 ATGATTAAGATCAGCCATATTTCAATTTGAATCTGCACTGGAACAAAAGCCACATTTGAGATTGGCTCATCTAGACCTGGC 1040

P. alecto IFIT1 1041 AGATATGTACATAGAAGCAGGCAACTATGAAAAAGCTGAAGACCTTATCAAAAAAGTGTATGCCTGAAAAACCTTTGACA 1120  
 H. sapiens IFIT1 1041 AAGATATGTATATAGAAGCAGGCAACTACAGAAAAAGCTGAAGACATTTTCAAAAAATGTTATGCATGAAACCACTTTGCTAG 1120

P. alecto IFIT1 1121 AAGAAATTCGCAAGAAATATATTTCTACTATGGCCAAATTCAGGAATTTCAAAAGAAATCTGAATTCATGCAATTATC 1200  
 H. sapiens IFIT1 1121 AAGAAACAATGCAAGACATACATTTCTACTATGGTGGTTTCAGGAATTTCAAAAGAAATCTGACCTCATGCAATTATC 1200

P. alecto IFIT1 1201 TATTATTTAAAAGCAATAAAAAATAGAAACCCAGTCATATTCAAGAGATAAAAGTATCAATCTTTTGAGAAATTGGTTTT 1280  
 H. sapiens IFIT1 1201 CATTATTTAAAAGCTATAAAAAATAGAACAGGCATCATTAACAGGAGATAAAAGTATCAATCTTTTGAGAAATTGGTTTT 1280

P. alecto IFIT1 1281 AAGGAACTTCGGAGAAATGGATCAGACATAGAAAGCTTGAGCATCCTCGGGTTCATCTACAAATTGAAGGAGAAATAGA 1360  
 H. sapiens IFIT1 1281 AAGGAACTTCGGAGAAAGGCATTAGATCTGAAAGCTTGAGCATCCTCGGGTTCATCTACAAATTGAAGGAAATATAGA 1360

P. alecto IFIT1 1361 ATGAAGCCTTGGAGTATTACGAGGAGGCCCTAAAGCTGGCTGCTGACTTTGAGAGCTTTGTGTGA 1425  
 H. sapiens IFIT1 1361 ATGAAGCCTTGGAGTCTATGAGCGGCCCTGAGAGCTGGCTGCTGACTTTGAGAACCTCTGTGAGACAAGGTCCTTAG 1437

**Supplementary Figure 11. Gene alignment of *P. alecto* and human *IFIT1*.** Grey boxes indicate identical residues. ClustalW alignment was generated using MacVector software.

## A

|                         |     |                                                                                      |     |
|-------------------------|-----|--------------------------------------------------------------------------------------|-----|
| <b>P. alecto IFIT1</b>  | 1   | MSKNAEDQVKDRLEQLRCHFTWKLLLETFEITDLENRVFDEIEFLDIKYNVGIHNLLAYIKHLKGONKEALESLKEAET      | 80  |
| <b>H. sapiens IFIT1</b> | 1   | MSTNGEDHQVKDSLEQLRCHFTWELSLIDDEMPDLENRVLDQIEFLDTKYSVGIHNLLAYVKHLKGONEEALKSLKEAEN     | 80  |
| <b>P. alecto IFIT1</b>  | 81  | LIQQERTNQSNITKRLVTWGNYYAWLYYHMGSLGVEVQIYLDKVENTCKKLASPSCCRLECEPEMDCEEGWALLKCGGKNYERA | 160 |
| <b>H. sapiens IFIT1</b> | 81  | LMQEHHDNQANVRS LVTWGNFAWYMYHMGRLAEAQTYLDKVENTCKKLSPFVRYRMCEPEIDCEEGWALLKCGGKNYERA    | 160 |
| <b>P. alecto IFIT1</b>  | 161 | KACFEKALEADPENPEFNTGYAITMFRDLSFHKETQFKEAFSLHPLKQAIRLNPEDATYKALLGLKLQDVVEQAEGQKYI     | 240 |
| <b>H. sapiens IFIT1</b> | 161 | KACFEKVLLEVDPENPESSAGYAISAYRLDGFKLATKNHKPFSLLPLRQAVRLNPDNGYIKVLLALKLQDEGQEAEGEKYI    | 240 |
| <b>P. alecto IFIT1</b>  | 241 | EEALTKMSSQTYVFRYAAMFYRRKGSVDKALQLLKTALQATPSSAF LHHQIGLCYRSQVVRQIKKTARWQPRGQDRENVNR   | 320 |
| <b>H. sapiens IFIT1</b> | 241 | EEALANMSSQTYVFRYAAMFYRRKGSVDKALQLLKKALQETPTSVL LHHQIGLCYKACMIQIKKEATKQPRGQNRKLDK     | 320 |
| <b>P. alecto IFIT1</b>  | 321 | ITRLAIFHFEFTLKQKPTFEIAYKHLADMYIEAGNYEKAEEDTYQKVRRLKKLDKEVLQETIYYQQFOEFQRKSEIDAII     | 400 |
| <b>H. sapiens IFIT1</b> | 321 | MIRSLAIFHFEFAVEKKPTFEVAHLDLARMYIEAGNHRKAEENFQKLLCMKPVVEETMDIHHEHYGRFOEFQRKSDVNAII    | 400 |
| <b>P. alecto IFIT1</b>  | 401 | YYLKAIKIENQSYSRDKSISLEKLVLRKLRRNGSDIESLSILGFIYKIKGEMNEALEYYEALKLAADFESFV             | 474 |
| <b>H. sapiens IFIT1</b> | 401 | HYLKAIKIEQASLTDRDKSINSIKLVLRKLRRKALDLESLSILGFVYKLEGNMNEALEYYERALLRLAADFENSVRQGP      | 478 |

## B

|                         |     |                                                                                      |     |
|-------------------------|-----|--------------------------------------------------------------------------------------|-----|
| <b>P. alecto IFIT3</b>  | 1   | MSEVS SSKNSLEKILPQLKCHFTWNLFQKDSLSHDLDRVRNQIEFLNTECKATTYNLLAYIKHLHQNEAALEYLQQAEE     | 80  |
| <b>H. sapiens IFIT3</b> | 1   | MSEVT -KNSLEKILPQLKCHFTWNLFKEDSVSRDLDRVCNQIEFLNTEFKATMYNLLAYIKHLDDNNEAALECLRQAEE     | 79  |
| <b>P. alecto IFIT3</b>  | 81  | LIQRERTDQVEIRSLVTWGNYYAWYYHLGRFSEAQVYVDKVKHLCEKFSNPYSIECEPELDSEEGWTLQCGGKNERAKV      | 160 |
| <b>H. sapiens IFIT3</b> | 80  | LIQQRHADAQAEIRSLVTWGNYYAWYYHLGRSLDAQIYVDKVKQTCKKFSNPYSIEYSELDCEEGWTLQKCGGKNERAKV     | 157 |
| <b>P. alecto IFIT3</b>  | 161 | CFEKALEEKKNPFESSGLAIAMYCLDDKPKQKCSVSVLQKAIELSPDNQYIKVLLALKLQKINKEAEGEPVIEALEKA       | 240 |
| <b>H. sapiens IFIT3</b> | 158 | CFEKALEEKKNPFESSGLAIAMYHLDNHPEKQFSTDVLQKAIELSPDNQYIKVLLGLKLQKMNKEAEGEQFVEALEKS       | 237 |
| <b>P. alecto IFIT3</b>  | 241 | PCQTDILHSAAKFYQKKGDLDAKIELLKKALESMFNNSHLCYLISGICYTAKVRQIENTGYSNASWNRKEIEELSKYARDY    | 320 |
| <b>H. sapiens IFIT3</b> | 238 | PCQTDVILRSAAKFYRRKGDLDAKIELFQRVLESTPNNGYLYHQIGCCYKAKVRQMONTGESEASGNKEMIEALKQYAMDY    | 317 |
| <b>P. alecto IFIT3</b>  | 321 | SEKAIIEKVLNPLNAYSDLAEP-LETECYQTA FNKELPNAEMKQFHQLSCNFOEYH GKSEDTPVQHYLKDLSISIKSTEKEK | 399 |
| <b>H. sapiens IFIT3</b> | 318 | SNKALEKGLNPLNAYSDLAEFLETECYQTFNKEVPDAEKQSHQRYCNLQKYNKGSEDTPVQHGLEGLSISKSTDKKE        | 397 |
| <b>P. alecto IFIT3</b>  | 400 | EKCQPQNVAAENQLPQNAPNSWYLOGLIHKKNGLYLQAAECFEKELGRLLRDSFSGTSSIFLPASELKEGSEEVGGGADSS    | 479 |
| <b>H. sapiens IFIT3</b> | 398 | IKDQPQNVSENLQPQNAPNYWYLOGLIHKQNGDLLQAAKCYEKELGRLLRDAFSGTSSIFLPASELEDGSEEMGGGAVSS     | 477 |
| <b>P. alecto IFIT3</b>  | 480 | T L R E L P D P                                                                      | 487 |
| <b>H. sapiens IFIT3</b> | 478 | S P R E L L S N S E Q L N                                                            | 490 |

**Supplementary Figure 12. Amino acid sequence comparison of human and *P. alecto* IFIT1 and IFIT3.** Grey boxes indicate identical residues. ClustalW alignment was generated using MacVector software for IFIT1 (A) and IFIT3 (B).

|                   |     |           |                               |                          |                     |                          |                  |               |           |         |     |
|-------------------|-----|-----------|-------------------------------|--------------------------|---------------------|--------------------------|------------------|---------------|-----------|---------|-----|
| P. alecto         | 1   | MSKNADEQV | KDRLEQLRCHFTWKLLIEDTEIT       | DLENRVFDEIEFLDI          | KYNVGIHNLAYI        | KHLKGQNK                 | EAL              | ESLKEAE       | T         | 80      |     |
| P. vampyrus       | 1   | MSKNADEQV | KDRLEQLRCHFTWKLLIEDTEIT       | DLENRVFDEIEFLDI          | KYNVGIHNLAYI        | KHLKGQNK                 | EAL              | ESLKEAE       | T         | 80      |     |
| R. aegyptiacus    | 1   | MSKNADEQV | KDRLEQLRCHFTWKLLIEDTEIT       | DLENRTFDEIEFLDI          | KHNVGIHNLAYI        | KHLKGQNK                 | EAL              | ESLKEAE       | T         | 80      |     |
| P. mesoamericanus | 1   | MSKSADQV  | KDRLEQLRCHFTWKLVI             | AEVPP                    | DLENRVFDEIEFLDTKFNV | AIHNLAYVKHL              | LTGQNK           | EAL           | QSLKAAED  | 80      |     |
| R. ferrumequinum  | 1   | MSKTTAEDK | IKDGLDQLRCHFTWKL              | LIEDTEMT                 | DLENRVFDEIEFLDTKFNV | GIHNLAYVKHLKGQNK         | EAL              | ESLKEAE       | T         | 80      |     |
| A. jamaicensis    | 1   | MSENSEEDQ | LKDRLEQLRCHFTWKL              | LIEDVEMT                 | DLENRIYNQIE         | YLDTKFNVAI               | HNLAYVKHLKGQNK   | EAL           | QSLKQAE   | 80      |     |
| S. hondurensis    | 1   | MSKNS     | SEEDQLKDRLEQLRCHFTWKL         | LIEDVEIA                 | DLENRIYSQIE         | FLDTKFNV                 | AIHNLAYVKHLKGQNK | EAL           | QSLKQAE   | 80      |     |
| P. hastatus       | 1   | MSKTS     | SEEDQLKDRLEQLRCHFTWKL         | LIEDVEIA                 | DLENRVFDEIEFLDTKFNV | SVHNLAYVKHLKGQNK         | EAL              | QSLKQAE       | 80        |         |     |
| P. discolor       | 1   | MSKTS     | KEDQLKDRLEQLRCHFTWKL          | LIEDVEIA                 | DLENRVFDEIEFLDTKFNV | PTYNHNLAYVKHLKGQNK       | EAL              | QSLKQAE       | 80        |         |     |
| D. rotundus       | 1   | MSKNA     | SEEDQLKDRLEQLRCHFTWKL         | LIEDVLS                  | DLENRVFDEIEFLDTKFNV | AIHNLAYVKHLKGQNK         | EAL              | QSLKQAE       | 80        |         |     |
| E. fuscus         | 1   | MSMNADEQ  | IQARLEQLRCHFTWKL              | LIEDTELS                 | DLENRVFDEIEFLDTKFNV | GIHNLAYVKHLKGQNK         | EAL              | QSLKQAE       | 80        |         |     |
| M. brandtii       | 1   | MSDELNDK  | LIEDKLVQLRCHFTWKL             | LIEDTEHL                 | DLENRV              | LDQIEYLDNNFNVGIHNLAYVKHL | NGHNK            | EAL           | ESLKEAE   | 80      |     |
| M. molossus       | 1   | MSKNADEQ  | IKARLEQLRCHFTWKL              | LIEDTELP                 | DLENRVFDEIEFLDTKFNV | GIHNLAYVKHLKGQNK         | EAL              | ESLKEAE       | T         | 80      |     |
| M. natalensis     | 1   | MGKNADEQ  | IKARVEQLRCHFTWKL              | LIEDTELL                 | DLENRVFDEIEFLDTKFNV | GIHNLAYVKHLKGQNK         | EAL              | QSLKEAE       | H         | 80      |     |
| P. kuhlii         | 1   | MSVNADEQ  | VRAKLEQLRCHFTWKL              | LIEDTVLS                 | DLENRVFDEIEFLDTKFNV | GIHNLAYVKHLKGQNK         | EAL              | QSLKEAE       | D         | 80      |     |
| H. sapiens        | 1   | MSTNGD    | HDHVKDSLEQLRCHFTWKL           | LIEDTEMP                 | DLENRV              | LDQIEFLDTKYS             | GIHNLAYVKHLKGQNK | EAL           | ESLKEAE   | N       | 80  |
| P. alecto         | 81  | LIQOERTN  | QSNTRKRLVTWGNyawlyyhmgs       | CEVQIYLDKVENTCKK         | LASPS               | CRLE                     | CEPMDCEE         | GWALLKCGGK    | NYERA     | 160     |     |
| P. vampyrus       | 81  | LIQOERTN  | QSNTRKRLVTWGNyawlyyhmgs       | CEVQIYLDKVENTCKK         | VASPS               | CRLE                     | CEPMDCEE         | GWALLKCGGK    | NYERA     | 160     |     |
| R. aegyptiacus    | 81  | LIQOERTN  | QSNTRKRLVTWGNyawlyyhmgs       | CEVQIYLDKVENTCKK         | VASPS               | CRLE                     | CEPMDCEE         | GWALLKCGGK    | NYERA     | 160     |     |
| P. mesoamericanus | 81  | LIQTEHARQ | SDVRRRLVTWGNyawlyyhmgs        | CEVQIYLDKVENTCKK         | QLASPS              | CRLE                     | CEPMDCEE         | GWALLKCGGK    | NYERA     | 160     |     |
| R. ferrumequinum  | 81  | LIQTEHARQ | SDVRRRLVTWGNyawlyyhmgs        | CEVQIYLDKVENTCKK         | QLASPS              | CRLE                     | CEPMDCEE         | GWALLKCGGK    | NYERA     | 160     |     |
| A. jamaicensis    | 81  | LSQTEHAGQ | SDVRRRLVTWGNyawlyyhmgs        | CEVQIYLDKVENTCKK         | QLASPS              | CRLE                     | CEPMDCEE         | GWALLKCGGK    | NYERA     | 160     |     |
| S. hondurensis    | 81  | LRQTEHVGQ | SEVRRRLVTWGNyawlyyhmgs        | CEVQIYLDKVENTCKK         | QLASPS              | CRLE                     | CEPMDCEE         | GWALLKCGGK    | NYERA     | 160     |     |
| P. hastatus       | 81  | LYQTEHODQ | AHVRRRLVTWGNyawlyyhmgs        | CEVQIYLDKVENTCKK         | QLASPS              | CRLE                     | CEPMDCEE         | GWALLKCGGK    | NYERA     | 160     |     |
| P. discolor       | 81  | LIQTEHODQ | AHVRRRLVTWGNyawlyyhmgs        | CEVQIYLDKVENTCKK         | QLASPS              | CRLE                     | CEPMDCEE         | GWALLKCGGK    | NYERA     | 160     |     |
| D. rotundus       | 81  | LIQTEHODQ | SEVRRRLVTWGNyawlyyhmgs        | CEVQIYLDKVENTCKK         | QLASPS              | CRLE                     | CEPMDCEE         | GWALLKCGGK    | NYERA     | 160     |     |
| E. fuscus         | 81  | LMQAEHAGQ | SDAIKLVTWGNyawlyyhmgs         | CEVQIYLDKVENTCKK         | QLASPS              | CRLE                     | CEPMDCEE         | GWALLKCGGK    | NYERA     | 160     |     |
| M. brandtii       | 81  | LMQAGHI   | IPQSDAIKLVTWGNyawlyyhmgs      | CEVQIYLDKVENTCKK         | QLASPS              | CRLE                     | CEPMDCEE         | GWALLKCGGK    | NYERA     | 160     |     |
| M. molossus       | 81  | LIQTEHAGQ | SDVSLVNWGNyawlyyhmgs          | CEVQIYLDKVENTCKK         | QLASPS              | CRLE                     | CEPMDCEE         | GWALLKCGGK    | NYERA     | 160     |     |
| M. natalensis     | 81  | LMQAEHAGQ | SDVRLVNWGNyawlyyhmgs          | CEVQIYLDKVENTCKK         | QLASPS              | CRLE                     | CEPMDCEE         | GWALLKCGGK    | NYERA     | 159     |     |
| P. kuhlii         | 81  | LMQAEHAGQ | SDAIELVTWGNyawlyyhmgs         | CEVQIYLDKVENTCKK         | QLASPS              | CRLE                     | CEPMDCEE         | GWALLKCGGK    | NYERA     | 160     |     |
| H. sapiens        | 81  | LMQAEHAGQ | SDAIELVTWGNyawlyyhmgs         | CEVQIYLDKVENTCKK         | QLASPS              | CRLE                     | CEPMDCEE         | GWALLKCGGK    | NYERA     | 160     |     |
| P. alecto         | 161 | KACFEKALE | ADPENPEFNTGYAI                | TMFRLDS                  | FFHKE               | TFKEAF                   | SLHPLKQAI        | RLNPEDAYIKALL | GLKLQDVGE | QAEQKYI | 240 |
| P. vampyrus       | 161 | KACFEKALE | VDPENPEFNTGYAI                | TMFRLDS                  | FFHKE               | TFKEAF                   | SLHPLKQAI        | RLNPEDAYIKALL | GLKLQDVGE | QAEQKYI | 240 |
| R. aegyptiacus    | 161 | KACFEKALE | VDPENPEFNTGYAI                | TMFRLDS                  | FFHKE               | TFKEAF                   | SLHPLKQAI        | RLNPEDAYIKALL | GLKLQDVGE | QAEQKYI | 240 |
| P. mesoamericanus | 161 | KACFEKALE | VDPENPEFNTGYAI                | AVYRLDGF                 | FNKAS               | TFKEAF                   | SLHPLKQAI        | RLNPEDAYIKALL | GLKLQDVGE | QAEQKYI | 240 |
| R. ferrumequinum  | 161 | KACFEKALE | VDPENPEFNTGYAI                | AVYRLDGF                 | FNKAS               | TFKEAF                   | SLHPLKQAI        | RLNPEDAYIKALL | GLKLQDVGE | QAEQKYI | 240 |
| A. jamaicensis    | 161 | KACFEKALE | VDPENPEFNTGYAI                | AVYRLDGF                 | FNKAS               | TFKEAF                   | SLHPLKQAI        | RLNPEDAYIKALL | GLKLQDVGE | QAEQKYI | 240 |
| S. hondurensis    | 161 | KACFEKALE | VDPENPEFNTGYAI                | AVYRLDGF                 | FNKAS               | TFKEAF                   | SLHPLKQAI        | RLNPEDAYIKALL | GLKLQDVGE | QAEQKYI | 240 |
| P. hastatus       | 161 | KACFEKALE | VDPENPEFNTGYAI                | AVYRLDGF                 | FNKAS               | TFKEAF                   | SLHPLKQAI        | RLNPEDAYIKALL | GLKLQDVGE | QAEQKYI | 240 |
| P. discolor       | 161 | KACFEKALE | VDPENPEFNTGYAI                | AVYRLDGF                 | FNKAS               | TFKEAF                   | SLHPLKQAI        | RLNPEDAYIKALL | GLKLQDVGE | QAEQKYI | 240 |
| D. rotundus       | 161 | KACFEKALE | VDPENPEFNTGYAI                | AVYRLDGF                 | FNKAS               | TFKEAF                   | SLHPLKQAI        | RLNPEDAYIKALL | GLKLQDVGE | QAEQKYI | 240 |
| E. fuscus         | 161 | KACFEKALE | VDPENPEFNTGYAI                | AVYRLDGF                 | FNKAS               | TFKEAF                   | SLHPLKQAI        | RLNPEDAYIKALL | GLKLQDVGE | QAEQKYI | 240 |
| M. brandtii       | 161 | KACFEKALE | VDPENPEFNTGYAI                | AVYRLDGF                 | FNKAS               | TFKEAF                   | SLHPLKQAI        | RLNPEDAYIKALL | GLKLQDVGE | QAEQKYI | 240 |
| M. molossus       | 161 | KACFEKALE | VDPENPEFNTGYAI                | AVYRLDGF                 | FNKAS               | TFKEAF                   | SLHPLKQAI        | RLNPEDAYIKALL | GLKLQDVGE | QAEQKYI | 240 |
| M. natalensis     | 160 | KACFEKALE | VDPENPEFNTGYAI                | AVYRLDGF                 | FNKAS               | TFKEAF                   | SLHPLKQAI        | RLNPEDAYIKALL | GLKLQDVGE | QAEQKYI | 239 |
| P. kuhlii         | 161 | KACFEKALE | VDPENPEFNTGYAI                | AVYRLDGF                 | FNKAS               | TFKEAF                   | SLHPLKQAI        | RLNPEDAYIKALL | GLKLQDVGE | QAEQKYI | 240 |
| H. sapiens        | 161 | KACFEKALE | VDPENPEFNTGYAI                | AVYRLDGF                 | FNKAS               | TFKEAF                   | SLHPLKQAI        | RLNPEDAYIKALL | GLKLQDVGE | QAEQKYI | 240 |
| P. alecto         | 241 | EEALTK    | MSSTQYVFRYAAMFYRRKGSVDKALQLLK | TALQATPSSAFLHHQIGLCYRSQV | RIKKTAKWQPRGQDREN   | VNR                      | 320              |               |           |         |     |
| P. vampyrus       | 241 | EEALTK    | MSSTQYVFRYAAMFYRRKGSVDKALQLLK | TALQATPSSAFLHHQIGLCYRSQV | RIKKTAKWQPRGQDREN   | VNR                      | 320              |               |           |         |     |
| R. aegyptiacus    | 241 | EEALTK    | MSSTQYVFRYAAMFYRRKGSVDKALQLLK | TALQATPSSAFLHHQIGLCYRSQV | RIKKTAKWQPRGQDREN   | VNR                      | 320              |               |           |         |     |
| P. mesoamericanus | 241 | EEALTK    | MSSTQYVFRYAAMFYRRKGSVDKALQLLK | TALQATPSSAFLHHQIGLCYRSQV | RIKKTAKWQPRGQDREN   | VNR                      | 320              |               |           |         |     |
| R. ferrumequinum  | 241 | EEALTK    | MSSTQYVFRYAAMFYRRKGSVDKALQLLK | TALQATPSSAFLHHQIGLCYRSQV | RIKKTAKWQPRGQDREN   | VNR                      | 320              |               |           |         |     |
| A. jamaicensis    | 241 | EEALTK    | MSSTQYVFRYAAMFYRRKGSVDKALQLLK | TALQATPSSAFLHHQIGLCYRSQV | RIKKTAKWQPRGQDREN   | VNR                      | 320              |               |           |         |     |
| S. hondurensis    | 241 | EEALTK    | MSSTQYVFRYAAMFYRRKGSVDKALQLLK | TALQATPSSAFLHHQIGLCYRSQV | RIKKTAKWQPRGQDREN   | VNR                      | 320              |               |           |         |     |
| P. hastatus       | 241 | EEALTK    | MSSTQYVFRYAAMFYRRKGSVDKALQLLK | TALQATPSSAFLHHQIGLCYRSQV | RIKKTAKWQPRGQDREN   | VNR                      | 320              |               |           |         |     |
| P. discolor       | 241 | EEALTK    | MSSTQYVFRYAAMFYRRKGSVDKALQLLK | TALQATPSSAFLHHQIGLCYRSQV | RIKKTAKWQPRGQDREN   | VNR                      | 320              |               |           |         |     |
| D. rotundus       | 241 | EEALTK    | MSSTQYVFRYAAMFYRRKGSVDKALQLLK | TALQATPSSAFLHHQIGLCYRSQV | RIKKTAKWQPRGQDREN   | VNR                      | 320              |               |           |         |     |
| E. fuscus         | 241 | EEALTK    | MSSTQYVFRYAAMFYRRKGSVDKALQLLK | TALQATPSSAFLHHQIGLCYRSQV | RIKKTAKWQPRGQDREN   | VNR                      | 320              |               |           |         |     |
| M. brandtii       | 241 | EEALTK    | MSSTQYVFRYAAMFYRRKGSVDKALQLLK | TALQATPSSAFLHHQIGLCYRSQV | RIKKTAKWQPRGQDREN   | VNR                      | 320              |               |           |         |     |
| M. molossus       | 240 | EEALTK    | MSSTQYVFRYAAMFYRRKGSVDKALQLLK | TALQATPSSAFLHHQIGLCYRSQV | RIKKTAKWQPRGQDREN   | VNR                      | 320              |               |           |         |     |
| M. natalensis     | 240 | EEALTK    | MSSTQYVFRYAAMFYRRKGSVDKALQLLK | TALQATPSSAFLHHQIGLCYRSQV | RIKKTAKWQPRGQDREN   | VNR                      | 320              |               |           |         |     |
| P. kuhlii         | 241 | EEALTK    | MSSTQYVFRYAAMFYRRKGSVDKALQLLK | TALQATPSSAFLHHQIGLCYRSQV | RIKKTAKWQPRGQDREN   | VNR                      | 320              |               |           |         |     |
| H. sapiens        | 241 | EEALTK    | MSSTQYVFRYAAMFYRRKGSVDKALQLLK | TALQATPSSAFLHHQIGLCYRSQV | RIKKTAKWQPRGQDREN   | VNR                      | 320              |               |           |         |     |

\*Supplementary Figure 13 continues on next page

|                   |     |                                                                                  |     |
|-------------------|-----|----------------------------------------------------------------------------------|-----|
| P. alecto         | 321 | ITRLAIFHFEFTLKQKPTFEIAYKHLADMYIEAGNYEKAEDTYQKVLRLKKLDKEVLQEIYFYVYGFQEFQKSEIDAI   | 400 |
| P. vampyrus       | 321 | ITRLAISHFEFTLKQKPTFEIAYIHLADMYIEAGNYEKAEDTYQKVLCLKKLDKEVLQEIYFYVYGRFQEFQKSEIDAI  | 400 |
| P. aegyptiacus    | 321 | IANLAISHFEFTLKQKPTFEIAYIHLADMYIEAGNYEKAEDTYQKVFMSKTLDDKDIQLDIYFHYGFQEFQKSESDAI   | 400 |
| P. mesoamericanus | 321 | VTKLAISHLEFALEQKPTMEIAYIHLADMYSEAGNYSKAEDAYKTVLSMKSLEGEEKLQEIYFYVYGRFQEFQKSEDDAI | 400 |
| R. ferrumequinum  | 321 | ITRLAISHFEFALEQKPTLEIAYKHLADMYIEAGNYGKAEDTYQKLLCLKSLEEBNLQEIYFYVYGRFQEFQKSEVDAI  | 400 |
| A. jamaicensis    | 321 | ITQLAISHFEFALEQKPTMEIAYVHLADMYIEAGNTRKAEDAYKTVFSMKSVEEEKLQEIYFYVYGRFQEFQKSEDAI   | 400 |
| S. hondurensis    | 321 | LVRMAICFEKKALELRPGEHMVYIDLAEYALGQHRLEAEDIFQKLLSMGIFHDHLHQNTHFRYGRFQEFQKSEVNAI    | 400 |
| P. hastatus       | 321 | ITKLAISHLEFALEQKPTMETAYVHLADMYIEAGNYRKAEDAYKTVFSMKSIEEEKLQDMYFHYGRFNEFHKKSEADA   | 400 |
| P. discolor       | 321 | ITKLAISHLEFALEQKPTMEIAYVHLADMYIEAGNYRKAEDAYKTVFSMKSIEEEKLQDMYFHYGRFNEFHKKSEADA   | 400 |
| D. rotundus       | 321 | ITKLAISHLEFALEQKPTMEIAYVHLADMYIEAGNYRKAEDAYKTVFSMKSLEEEKLQEIYFYVYGRFNEFHKKSEADA  | 400 |
| E. fuscus         | 321 | ITKLAISHFEFALEQKPTFEIAYIHLADMYVQAGNTRKAEDTYQKLLCMKSLKEENMQEIYFYVYGRFQEFQKSEVDAI  | 400 |
| M. brandtii       | 321 | KTKLAISHFEFAVEQKPTFEIAYMHLADMYSVAGNSRKAEDTYQKVFMSKSLKEEKIQEIYFYVYGRFQEFQKSEVDAI  | 400 |
| M. molossus       | 321 | ITRLAISHFEFALEQKPTFDIAYIHLADMYIEAGDYAKTDPLQYKVFMTPLDEKQLQELYLHHGRYQEFQKSEVSAMI   | 400 |
| M. natalensis     | 320 | ITRLAISHFEFALEQKPTFEVAYIHLADMYIEAGNYRKAEDAYQKLLSMKSLKEETLQEIYFYVYGRFQEFQKSEVNAI  | 399 |
| P. kuhlii         | 321 | ITKLAISHLEFAVEQKPTFDIAYLHLADMYIQAGSYRKAEDAYQKLLRVKSLKEETMQEIYFYVYGRFQEFQKSEVDAI  | 400 |
| H. sapiens        | 321 | MIRSAIFHFEFAVEKQKPTFEVHLDLARMYIEAGNHRKAEDENFQKLLCMKPVVEETMQDIHFHYGRFQEFQKSDVNAI  | 400 |

  

|                   |     |                                                                               |     |
|-------------------|-----|-------------------------------------------------------------------------------|-----|
| P. alecto         | 401 | YYLKAIKIENQSYSRDKSISSELEKLVRLKLRNGSDIESLSILGFIYKLGEMNEALEYEEQALKLAADFFSFV     | 474 |
| P. vampyrus       | 401 | YYLKAIKIENQSYSRDKSISSELEKLVRLKLRNNSDIESLSILGFIYKLGEMNEALEYEEQALNLAADFFERF     | 473 |
| R. aegyptiacus    | 401 | YYLKAIKIENQSYSRDKSISSELEKLVRLKLRNNSDIESLRILRFIDKLGKEINEASFSDEKALKLAADFFSSVGLK | 477 |
| P. mesoamericanus | 401 | SYLKAITIEKPSFSRDKSLSALEKLVRLKLOTNEADIEQLSILGFVYKSRGEMNKALEYEEQALRLAAGF        | 470 |
| R. ferrumequinum  | 401 | YYLKSIEVAKPSFTRDKSISALEKLVRLKLRNNTSDIESLSILGFIHKLKGEINEALEYERARLSADVKNNSVGVDW | 478 |
| A. jamaicensis    | 401 | YYLKAIKIENQSYSRDKSISALEKLVRLKLRNEADVESLSILGFVYKLGEMHEALGYERARLRAAGSENSVGVVP   | 478 |
| S. hondurensis    | 401 | YYLKAINKENSLFTSNESLRALKLVRLRRHRNGADIESLSILGFIHKKMGEMHEALECYEQALRLAAGSENSVGHVP | 478 |
| P. hastatus       | 401 | YYLKAINKENSFTSNRSLSALEKLVRLKLRNEADVESLSILGFVCKLGEMHEALEWYERARKLAAGSENSVGHVP   | 478 |
| P. discolor       | 401 | YYLKAIKIEKSTFSRENSLSALEKLVRLKLRNGADIESLSILGFVYKLGEMHEALEWYERARLRAAGSENSVGRVP  | 478 |
| D. rotundus       | 401 | YYLKAIKIEKSTFSRENSLSALEKLVRLKLRNEADVESLSILGFVYKLGEMHEALEYERARLSLPGCWL         | 471 |
| E. fuscus         | 401 | YYLKAIKIEKPS-LRDRSINSLEHVVILKLRNPVDIESLSILGFTYKLGEMNKALEYERARLRAADFENPVGHAP   | 477 |
| M. brandtii       | 401 | YYLKAIKIEKPS-PRDRSISALEHVVILKLRNAEDMESLGILGFIYKLGKEINKALEYERARLRAAD           | 469 |
| M. molossus       | 401 | YYLKAIKIEKPTVYDRSISLEKLVRLKLRHRRNAEDIESLSILGFIYKLGEMNKALECYEQALRLANE          | 469 |
| M. natalensis     | 400 | YYLKIKINKLSIVREISIALEKLVRLKLRHRRNAEDMESLSILGLIYKLGEMNKALEYERARLRAAGFENSVDHVP  | 477 |
| P. kuhlii         | 401 | YYLKAIKIEKPSVYDRSISLEKLVRLKLRNNAEDIESLSILGFTYKLGEMNKALEYERARLRAANFESPVGHAP    | 478 |
| H. sapiens        | 401 | HYLKAIKIEKASLTRDKSINSLEKLVRLKLRKALDIESLSILGFVYKLEGNMNEALEYERARLRAADFENSVRQGP  | 478 |

**Supplementary Figure 13. Multiple protein sequence alignment for bat IFIT1.** Grey boxes indicate identical residues. ClustalW alignment was generated using MacVector software. Human sequence was included as a comparator. Black arrows indicate residues in human IFIT1 that are known to play a role in mRNA binding (R38, L46, W147, K151, E176 and Y218). Purple box highlights IFIT3 binding motif.

|                  |     |                                       |   |     |               |   |   |   |   |    |    |    |    |    |   |   |   |   |   |   |   |   |   |   |   |   |   |   |   |   |   |   |   |   |   |   |   |   |   |   |   |   |   |   |   |   |   |   |   |   |   |   |   |   |     |     |   |   |     |     |     |
|------------------|-----|---------------------------------------|---|-----|---------------|---|---|---|---|----|----|----|----|----|---|---|---|---|---|---|---|---|---|---|---|---|---|---|---|---|---|---|---|---|---|---|---|---|---|---|---|---|---|---|---|---|---|---|---|---|---|---|---|---|-----|-----|---|---|-----|-----|-----|
| P. aleo          | 223 | INKEAEGEPLV                           | I | EAL | EKAP          | Q | T | D | L | LH | SA | AK | F  | Y  | K | K | G | D | L | K | A | I | E | L | L | K | A | L | E | S | M | P | N | S | H | L | C | Y | L | S | G | C | T | A | K | V | R | I | E | N | T | G | Y | S | N   | 302 |   |   |     |     |     |
| P. vampyrus      | 222 | INKEAEGEPLV                           | I | EAL | EKAP          | Q | T | D | L | LH | SA | AK | F  | Y  | K | K | G | D | L | K | A | I | E | L | L | K | A | L | E | S | M | P | N | S | H | L | C | Y | L | S | G | C | T | A | K | V | R | I | E | N | T | G | Y | S | N   | 301 |   |   |     |     |     |
| P. giganteus     | 222 | INKEAEGEPLV                           | I | EAL | EKAP          | Q | T | D | L | LH | SA | AK | F  | Y  | K | K | G | D | L | K | A | I | E | L | L | K | A | L | E | S | M | P | N | S | H | L | C | Y | L | S | G | C | T | A | K | V | R | I | E | N | T | G | Y | S | N   | 301 |   |   |     |     |     |
| R. aegyptiacus   | 222 | INKEA <b>K</b> GEPLV                  | I | EAL | EKAP          | Q | T | D | V | L  | C  | R  | A  | A  | F | Y | R | K | G | D | L | K | A | I | E | L | L | K | A | L | E | S | M | P | N | S | Y | C | H | L | S | C | T | A | K | V | R | I | E | N | T | E | D | S | 301 |     |   |   |     |     |     |
| R. ferrumequinum | 222 | IN <b>K</b> <b>D</b> TEGEPLV          | I | EAL | EKAP          | Q | T | D | V | L  | H  | N  | A  | A  | F | Y | K | I | K | G | D | L | K | A | I | E | L | F | O | K | A | L | E | S | M | P | N | S | G | Y | I | C | H | A | R | C | E | R | K | A | Q | I | D | T | E   | G   | S | E | 301 |     |     |
| R. sinicus       | 222 | IN <b>K</b> <b>T</b> TEGEPLV          | I | EAL | EKAP          | R | O | T | D | V  | L  | H  | N  | A  | A | F | Y | K | I | K | G | D | L | K | A | I | E | L | F | O | K | A | L | E | S | M | P | N | S | G | Y | I | C | H | A | R | C | E | R | K | A | Q | I | D | T   | E   | G | S | E   | 301 |     |
| A. jamaicensis   | 240 | ANKEAEGEPLV                           | A | EAL | EKAP          | Q | T | D | L | LH | SA | AK | F  | Y  | K | K | G | D | L | K | A | I | E | L | F | O | K | A | L | E | S | L | P | N | S | R | Y | I | C | Q | I | A | S | C | Y | R | A | K | A | Q | I | E | D | T | E   | D   | S | E | 319 |     |     |
| S. hondurensis   | 224 | VNKE <b>G</b> GEPLV                   | A | EAL | EKAP          | H | O | T | D | V  | L  | H  | SA | AK | F | Y | K | K | G | D | L | K | A | I | E | L | F | O | K | A | L | E | S | L | P | N | S | C | Y | I | C | Q | I | A | S | C | Y | R | A | K | E | Q | I | E | N   | T   | E | G | S   | E   | 309 |
| P. hastatus      | 230 | INKEAEGEPLV                           | V | EAL | EKAP          | Q | T | D | V | L  | L  | SA | AK | F  | Y | K | K | G | D | L | K | A | I | E | L | F | O | K | A | L | E | S | L | P | N | S | Y | I | C | Q | I | A | S | C | Y | R | A | K | E | Q | I | E | N | T | E   | G   | S | E | 303 |     |     |
| P. discolor      | 224 | INKEAEGEPLV                           | V | EAL | EKAP          | Q | T | D | V | L  | L  | SA | AK | F  | Y | K | K | G | D | L | K | A | I | E | L | F | O | K | A | L | E | S | L | P | N | S | Y | I | C | Q | I | A | S | C | Y | R | A | K | E | Q | I | E | N | T | E   | G   | S | E | 303 |     |     |
| D. rotundus      | 222 | INKEAEGEPLV                           | G | EAL | EKAP          | R | O | T | D | V  | L  | L  | SA | AK | F | Y | K | K | G | D | L | K | A | I | E | L | F | O | K | A | L | E | S | L | P | N | S | Y | I | C | Q | I | A | S | C | Y | R | A | K | E | Q | I | E | N | T   | E   | G | S | E   | 301 |     |
| E. fuscus        | 222 | MY <b>E</b> AE <b>G</b> EP <b>L</b> I | E | EAL | E <b>R</b> AP | Q | T | D | V | L  | N  | A  | A  | F  | Y | R | K | K | G | D | L | K | A | I | E | L | L | K | A | L | E | S | L | P | N | S | N | I | C | R | O | I | A | C | C | R | A | K | E | Q | I | E | N | T | E   | G   | S | E | 301 |     |     |
| M. brandtii      | 222 | INKEAEG <b>V</b> LLI                  | E | EAL | EKAP          | Q | T | D | V | L  | L  | SA | AK | F  | Y | R | K | K | G | D | L | K | A | I | E | L | F | O | K | A | L | E | S | L | P | N | S | N | I | C | R | O | I | A | C | C | R | A | K | E | Q | I | E | N | T   | E   | G | S | E   | 301 |     |
| M. myotis        | 222 | INKEAEGGLI                            | E | EAL | EKAP          | Q | T | D | V | L  | L  | SA | AK | F  | Y | R | K | K | G | D | L | K | A | I | E | L | F | O | K | A | L | E | S | L | P | N | S | N | I | C | R | O | I | A | C | C | R | A | K | E | Q | I | E | N | T   | E   | G | S | E   | 301 |     |
| M. davidii       | 222 | INKEAEGGLI                            | E | EAL | EKAP          | Q | T | D | V | L  | L  | SA | AK | F  | Y | R | K | K | G | D | L | K | A | I | E | L | F | O | K | A | L | E | S | L | P | N | S | N | I | C | R | O | I | A | C | C | R | A | K | E | Q | I | E | N | T   | E   | G | S | E   | 301 |     |
| M. lucifugus     | 222 | IN <b>E</b> AE <b>G</b> GLI           | E | EAL | EKAP          | Q | T | D | V | L  | L  | SA | AK | F  | Y | R | K | K | G | D | L | K | A | I | E | L | F | O | K | A | L | E | S | L | P | N | S | N | I | C | R | O | I | A | C | C | R | A | K | E | Q | I | E | N | T   | E   | G | S | E   | 301 |     |
| M. molossus      | 222 | TKKEA <b>E</b> GL <b>W</b> VI         | E | EAL | E <b>R</b> AP | Q | R | D | V | L  | L  | SA | AK | F  | Y | R | K | K | G | D | L | K | A | I | E | L | L | K | A | L | E | S | L | P | N | S | R | Y | L | C | H | L | I | A | C | H | Y | A | K | A | Q | I | D | T | E   | D   | S | E | 301 |     |     |
| M. natalensis    | 222 | TKHEAEGEPLV                           | V | EAL | EKAP          | Q | T | D | V | L  | L  | SA | AK | F  | Y | R | K | K | G | D | L | K | A | I | E | L | F | O | K | A | L | E | S | L | P | N | S | Y | I | C | R | O | I | A | C | C | R | A | K | E | Q | I | E | N | T   | E   | G | S | E   | 301 |     |

**\*Supplementary Figure 14 continues on next page**

|                  |     |              |                                  |                                          |                                 |             |             |     |
|------------------|-----|--------------|----------------------------------|------------------------------------------|---------------------------------|-------------|-------------|-----|
| P. alecto        | 303 | ASWNREKIEELS | SKYARDYSEKAIEKVLNPLNAYSDLAEP-ET  | ECYQTAFNKKLPNAEMKQFHQLSCNFQEYHGKSEDTVP   | 381                             |             |             |     |
| P. vampyrus      | 302 | ASWNREKIEELS | SKYARDYSEKAIEKVLNPLNAYSDLAEP-ET  | ECYQTAFNKKLPNAEMKQFHQLSCNFQEYHGKSEDTVP   | 380                             |             |             |     |
| P. giganteus     | 302 | ASWNREKIEELS | SKYARDYSEKAIEKVLNPLNAYSDLAEP-ET  | ECYQTAFNKKLPNAEMKQFHQLSCNFQEYHGKSEDTVP   | 380                             |             |             |     |
| R. aegyptiacus   | 302 | TSWNREKIEELS | SKYARDYAKKAIEKGNPLNAYFDLAEP-ET   | ECYNTAFDEEXPDAATKQLHQLSCNFQEYLGKSEDTVP   | 380                             |             |             |     |
| R. ferrumequinum | 302 | VSRRREKFEEL  | RKYAMDYSKKAIEKGLSFLYAYSDLTELETE  | CHPTAFNSSELPDTERKKLHQGGYNLQEHGTS         | EDTVP                           | 380         |             |     |
| R. sinicus       | 302 | VSRRREKFEEL  | SKYAMDYSKAMKGLSFLYAYSDLTEPEKE    | CHPTAFNSRELPTNTERKKLHQGGYNLQEHGTS        | EDTVP                           | 380         |             |     |
| A. jamaicensis   | 320 | TDNRREKIEEL  | RKYARQYSNKAIEKGLDPLVYAYSDLTELETE | EECFET----                               | AFPKAEKKQFHQGGSNVQOYOGTSEDTSV   | 395         |             |     |
| S. hondurensis   | 304 | ADNRREKIEEL  | RKYAREYSNKAIEKGLNPIYAYSDLTELETE  | EECFET----                               | AFQKVERKKQFHQGGSTFQEDDGTSEDTSV  | 379         |             |     |
| P. hastatus      | 310 | ADNRREKIEEL  | RKYARKYSNKAIEKGLNPIYAYSDLTELETE  | EECFET----                               | AFPEASRKQFYOGYSNFOYOGKSEDTSV    | 385         |             |     |
| P. discolor      | 304 | ADNRREKIEEL  | RKYAREYSNKAIEKGLNPIYAYSDLTELETE  | EECFET----                               | AFPEASRKQFYOGGSNFRQYOGKSEDTSV   | 379         |             |     |
| D. rotundus      | 302 | ADNRREKIEEL  | RKYARDYSNKAIEKGLNPIYAYSDLTELETE  | EECFET----                               | TFREAERKKQFHQGGYNFRDYOGKSEDTSV  | 377         |             |     |
| E. fuscus        | 302 | AGGNREKMEEL  | RKSAMDYANKAIEKGLDPLVYAYSDLTELE   | SEECYQT----                              | AFNKAERKKPLHQGGYNFQBNQKSEDTVP   | 377         |             |     |
| M. brandtii      | 302 | AGGNREKMEEL  | RKSAMDYSNKAIEKGLNPLVYAYSDLTELES  | SEECYQT----                              | AFNKAERKKLHQGGYNFQBNQKSEDTVP    | 377         |             |     |
| M. myotis        | 302 | AGGNREKMEEL  | RKSAMDYSNKAIEKGLNPLVYAYSDLTELES  | SEECYQT----                              | AFNKAERKKLHQGGYNFQBNQKSEDTVP    | 377         |             |     |
| M. davidii       | 302 | ADGNREKMEEL  | RKSAMDYSNKAIEKGLNPLVYAYSDLTELES  | SEECYPT----                              | AFHEAERKKLHQGGYNFQBNQKSEDTVP    | 377         |             |     |
| M. lucifugus     | 302 | AGGNREKMEEL  | RKSAMDYSNKAIEKGLNPLVYAYSDLTELES  | SEECYQT----                              | AFDKAERKKLHQGGYNFQBNQKSEDTVP    | 377         |             |     |
| M. molossus      | 302 | APRNGEIEEL   | RKQAMHYLKKAIEKGLNPLVYAYSDLTELETE | EECHOTPCSKELSEANRKPLPHYSYNFQBNHNGRSEDTVP | 380                             |             |             |     |
| M. natalensis    | 302 | ARRRREKIEEL  | RKYAMNYLKAYIEKGLNPLDYVSNFNDLETE  | EYFOT----                                | VSNKAERKKQPHQGGYNFQBNHNGRSEDTVP | 377         |             |     |
| H. sapiens       | 300 | ASGNKEMTEAL  | KQYAMDYSNKAIEKGLNPLNAYSDLAEPFLET | ECYQTPFNKEVFPDAEKQSSHQRVCNLRKYN          | NGRSEDTAV                       | 379         |             |     |
|                  |     |              |                                  |                                          |                                 |             |             |     |
| P. alecto        | 382 | QHHLKDL      | SLISKSTEKEKEKCPQNV               | VAENQLPQNA                               | PNNSWYLQGLTHKKNGYLLQAAEC        | FEKELGRLLRD | SPSGISSIFLP | 461 |
| P. vampyrus      | 381 | QHHLKDL      | SLISKSTEKEKEKCPQNV               | VAENQLPQNA                               | PNNSWYLQGLTHKKNGYLLQAAEC        | FEKELGRLLRD | SPSGISSIFLP | 460 |
| P. giganteus     | 381 | QHHLKDL      | SLISKSTEKEKEKCPQNV               | VAENQLPQNA                               | PNNSWYLQGLTHKKNGYLLQAAEC        | FEKELGRLLRD | SPSGISSIFLP | 460 |
| R. aegyptiacus   | 381 | QHHLKDL      | SLISKSTEKEKEKCPQNV               | VAENQLPQNA                               | PNNSWYLQGLTHKKNGYLLQAAEC        | FEKELGRLLRD | SPSGISSIFLP | 460 |
| R. ferrumequinum | 381 | QHHLKDL      | SLISKSTEKEKMKYQPN                | AAENQLPQNA                               | PNNSWYLQGLTHKKNGYLLQAAEC        | FEKELGRLLRD | SPSGISSIFLP | 460 |
| R. sinicus       | 381 | QHHLKDL      | SLISKSTEKEKMKYQPN                | AAENQLPQNT                               | PNNSWYLQGLTHKKNGYLLQAAEC        | FEKELGRLLRD | SPSGISSIFLP | 460 |
| A. jamaicensis   | 396 | LHHLNLT      | VNTKATEKEKAKYQPN                 | GAENQLPQNA                               | PNNSWYLQGLTHKKNGYLLQAAEC        | FEKELGRLLRD | SPSGISSIFLP | 470 |
| S. hondurensis   | 380 | LHHLNLT      | VNTKATEKEKAKYQPN                 | GAENQLPQNA                               | PNNSWYLQGLTHKKNGYLLQAAEC        | FEKELGRLLRD | SPSGISSIFLP | 459 |
| P. hastatus      | 386 | LPHLNVL      | PIPTKSTEKEKVKYQPN                | GAENQLPQNA                               | PNNSWYLQGLTHKKNGYLLQAAEC        | FEKELGRLLRD | SPSGISSIFLP | 465 |
| P. discolor      | 380 | LPHLNVL      | PIPTKSTEKEKVKYQPN                | GAENQLPQNA                               | PNNSWYLQGLTHKKNGYLLQAAEC        | FEKELGRLLRD | SPSGISSIFLP | 459 |
| D. rotundus      | 378 | LHHLNVL      | TIPTKSTEKEKVKYQPN                | GAENQLPQNA                               | PNNSWYLQGLTHKKNGYLLQAAEC        | FEKELGRLLRD | SPSGISSIFLP | 457 |
| E. fuscus        | 378 | QHHL         | -----STKST-----                  | ANGAERQLPR--                             | NSWYLQGLTHKKNGYLLQAAEC          | FEKELGRLLRD | SPSGISSIFLP | 440 |
| M. brandtii      | 378 | QHHL         | -----STKST-----                  | ANGAERQLPR--                             | NSWYLQGLTHKKNGYLLQAAEC          | FEKELGRLLRD | SPSGISSIFLP | 440 |
| M. myotis        | 378 | QHHL         | -----STKST-----                  | VNGAERQLPR--                             | NSWYLQGLTHKKNGYLLQAAEC          | FEKELGRLLRD | SPSGISSIFLP | 440 |
| M. davidii       | 378 | QHHL         | -----STKST-----                  | ANGAERQLPR--                             | NSWYLQGLTHKKNGYLLQAAEC          | FEKELGRLLRD | SPSGISSIFLP | 440 |
| M. lucifugus     | 378 | QHHL         | -----STKST-----                  | ANGAERQLPR--                             | NSWYLQGLTHKKNGYLLQAAEC          | FEKELGRLLRD | SPSGISSIFLP | 440 |
| M. molossus      | 381 | LHPLRTE      | KEKLYQ-----PONGAENLPQ            | TAQNDWYLQGLTHKKNGYLLQAAEC                | FEKELGRLLRD                     | SPSGISSIFLP |             | 452 |
| M. natalensis    | 378 | LHDLRA       | TTISTLLST-----                   | ENGAENHLPQ                               | DAPNSWYLQGLTHKKNGYLLQAAEC       | FEKELGRLLRD | SPSGISSIFLP | 448 |
| H. sapiens       | 380 | QHHL         | LEGSLISKSTDKKEIKDQPN             | VSENLLPQNA                               | PNNSWYLQGLTHKKNGYLLQAAEC        | FEKELGRLLRD | SPSGISSIFLP | 459 |
|                  |     |              |                                  |                                          |                                 |             |             |     |
| P. alecto        | 462 | ASELKE       | -GSEEVGGAGDSST-LRELDPD           |                                          |                                 |             |             | 487 |
| P. vampyrus      | 461 | ASELKE       | -GSEEVGGAGDSST-LRELDPD           |                                          |                                 |             |             | 486 |
| P. giganteus     | 461 | ASELKE       | -GSEEVGGAGDSST-LRELDPD           |                                          |                                 |             |             | 486 |
| R. aegyptiacus   | 461 | AADLKE       | -GSEEVGGAGDSSTSLRELPA            |                                          |                                 |             |             | 487 |
| R. ferrumequinum | 461 | TSELEE       | -GNERVGGAGDSST-LGEPLDS           |                                          |                                 |             |             | 486 |
| R. sinicus       | 461 | TSELEE       | -GNERVGGAGDSST-LGEPLDS           |                                          |                                 |             |             | 487 |
| A. jamaicensis   | 476 | ASELEE       | -GSAEVGGQTNGFP-LSELDPD           | RAETEGRERE                               | GEGGAWNCHEGKKDGKAGVPQSELAD      |             |             | 537 |
| S. hondurensis   | 460 | TSELEE       | -GCEEAGGGAGDSST-LSELDPD          | RAETEGRERE                               | GEGGAWNCHEGKKDGKAGVPQSELAD      |             |             | 521 |
| P. hastatus      | 466 | ASELED       | -GHAEVGGQTDGFP-LSELDPD           | GAETEGRERE                               | GEGGAWNCHEGKKDGKAGVPQSELAD      |             |             | 527 |
| P. discolor      | 460 | ASELED       | -GHAEVGGQTDGFP-LSELDPD           | GAETEGRERE                               | GEGGAWNCHEGKKDGKAGVPQSELAD      |             |             | 521 |
| D. rotundus      | 458 | ASELEE       | -GSAEVGGQTDSSP-LSELDPD           | GAETEGRERE                               | GEGGAWNCHEGKKDGKAGVPQSELAD      |             |             | 519 |
| E. fuscus        | 441 | AEELAE       | -GSAEVGGAGSSP-LSKLSD             | PLADTEE                                  |                                 |             |             | 472 |
| M. brandtii      | 441 | AEELAE       | -GSAEVGGAGSSP-LSKLSD             | PLADTEE                                  |                                 |             |             | 472 |
| M. myotis        | 441 | AEELAE       | -GSAEVGGAGSSP-LSKLSD             | PLADTEE                                  |                                 |             |             | 472 |
| M. davidii       | 441 | AEELAE       | -GSAEVGGAGSSP-LSKLSD             | PLADTEE                                  |                                 |             |             | 472 |
| M. lucifugus     | 441 | AEELAE       | -GSAEVGGAGSSP-LSKLSD             | PLADTEE                                  |                                 |             |             | 472 |
| M. molossus      | 453 | ASELEE       | -GSAEVGGAGAPV-SVKPLH             |                                          |                                 |             |             | 478 |
| M. natalensis    | 449 | ASELEE       | -GSAEVGGAGAPV-SVKPLH             |                                          |                                 |             |             | 471 |
| H. sapiens       | 460 | ASELEE       | -GSAEVGGAGAPV-SVKPLH             |                                          |                                 |             |             | 490 |

**Supplementary Figure 14. Multiple protein sequence alignment for bat IFIT3.** Grey boxes indicate identical residues. ClustalW alignment was generated using MacVector software. Human sequence was included as a comparator. Purple box highlights IFIT1 binding motif.



|                     |                   |     |                                                                                  |     |
|---------------------|-------------------|-----|----------------------------------------------------------------------------------|-----|
| Pteropodidae        | P. alecto         | 1   | MSSETQMPGPVCLIENTENEITVNNKALILLSAITQPLVVVAIVGLYRTGKSYLMNKLAKKKGFSLGSTVQSHTKGIWM  | 80  |
|                     | P. giganteus      | 1   | MSSETQMPGPVCLIENTENEITVNNKALKILSAITQPLVVVAIVGLYRTGKSYLMNKLAKKKGFSLGSTVQSHTKGIWM  | 80  |
|                     | P. vampyrus       | 1   | MSSETQMPGPVCLIENTENEITVNNKALKILSAITQPLVVVAIVGLYRTGKSYLMNKLAKKKGFSLGSTVQSHTKGIWM  | 80  |
|                     | P. mesoamericanus | 1   | MSSETQMPGPVCLIENTENEITVNNKALKILSAITQPLVVVAIVGLYRTGKSYLMNKLAKKKGFSLGSTVQSHTKGIWM  | 80  |
|                     | S. hondurensis    | 1   | MASETHMPGPVCLIENTENTQANPEALKILSAITQPLVVVAIVGLYRTGKSYLMNKLAKKKGFSLGSTVQSHTKGIWM   | 80  |
|                     | A. jamaicensis    | 1   | MSETHMHPVCLIENTNGKIAANPEALKILSAITQPLVVVAIVGLYRTGKSYLMNKLAKKKGFSLGSTVQSHTKGIWM    | 80  |
|                     | P. discolor       | 1   | MASETHMHPVCLIENTNGKIAANPEALKILSAITQPLVVVAIVGLYRTGKSYLMNKLAKKKGFSLGSTVQSHTKGIWM   | 80  |
|                     | P. hastatus       | 1   | MASETHMHPVCLIENTNGKIAANPEALKILSAITQPLVVVAIVGLYRTGKSYLMNKLAKKKGFSLGSTVQSHTKGIWM   | 80  |
|                     | D. rotundus       | 1   | MASETHMHPVCLIENTNGKIAANPEALKILSAITQPLVVVAIVGLYRTGKSYLMNKLAKKKGFSLGSTVQSHTKGIWM   | 80  |
|                     | E. fuscus         | 1   | MASDIQMPGPVCLIENTDTQANPEALKILSAITQPLVVVAIVGLYRTGKSYLMNKLAKKKGFSLGSTVQSHTKGIWM    | 80  |
| Vespertilionidae    | M. lucifugus      | 1   | MASDIQMPGPVCLIENTDTQANPEALKILSAITQPLVVVAIVGLYRTGKSYLMNKLAKKKGFSLGSTVQSHTKGIWM    | 80  |
|                     | M. myotis         | 1   | MASDIQMPGPVCLIENTDTQANPEALKILSAITQPLVVVAIVGLYRTGKSYLMNKLAKKKGFSLGSTVQSHTKGIWM    | 80  |
|                     | M. daubentonii    | 1   | MASDIQMPGPVCLIENTDTQANPEALKILSAITQPLVVVAIVGLYRTGKSYLMNKLAKKKGFSLGSTVQSHTKGIWM    | 80  |
|                     | P. kuhlii         | 1   | MASDIQMPGPVCLIENTDTQANPEALKILSAITQPLVVVAIVGLYRTGKSYLMNKLAKKKGFSLGSTVQSHTKGIWM    | 80  |
| Hominidae (outlier) | H. sapiens        | 1   | MASDIQMPGPVCLIENTDTQANPEALKILSAITQPLVVVAIVGLYRTGKSYLMNKLAKKKGFSLGSTVQSHTKGIWM    | 80  |
| Pteropodidae        | P. alecto         | 81  | WCVPHPKPDHTLVLLDTEG.GDVEKGDNQNDSWIFALAILLSSTFVYNSMGTINQAMDQLHYVTELDRIAKSSPDA     | 160 |
|                     | P. giganteus      | 81  | WCVPHPKPDHTLVLLDTEG.GDVEKGDNQNDSWIFALAILLSSTFVYNSMGTINQAMDQLHYVTELDRIAKSSPDA     | 160 |
|                     | P. vampyrus       | 81  | WCVPHPKPDHTLVLLDTEG.GDVEKGDNQNDSWIFALAILLSSTFVYNSMGTINQAMDQLHYVTELDRIAKSSPDA     | 160 |
|                     | P. mesoamericanus | 81  | WCVPHPKPDHTLVLLDTEG.GDVEKGDNQNDSWIFALAILLSSTFVYNSMGTINQAMDQLHYVTELDRIAKSSPDA     | 160 |
|                     | S. hondurensis    | 81  | WCVPHPKPDHTLVLLDTEG.GDVEKGDNQNDSWIFALAILLSSTFVYNSMGTINQAMDQLHYVTELDRIAKSSPDA     | 160 |
|                     | A. jamaicensis    | 81  | WCVPHPKPDHTLVLLDTEG.GDVEKGDNQNDSWIFALAILLSSTFVYNSMGTINQAMDQLHYVTELDRIAKSSPDA     | 160 |
|                     | P. discolor       | 81  | WCVPHPKPDHTLVLLDTEG.GDVEKGDNQNDSWIFALAILLSSTFVYNSMGTINQAMDQLHYVTELDRIAKSSPDA     | 160 |
|                     | P. hastatus       | 81  | WCVPHPKPDHTLVLLDTEG.GDVEKGDNQNDSWIFALAILLSSTFVYNSMGTINQAMDQLHYVTELDRIAKSSPDA     | 160 |
|                     | D. rotundus       | 81  | WCVPHPKPDHTLVLLDTEG.GDVEKGDNQNDSWIFALAILLSSTFVYNSMGTINQAMDQLHYVTELDRIAKSSPDA     | 160 |
|                     | E. fuscus         | 81  | WCVPHPKPDHTLVLLDTEG.GDVEKGDNQNDSWIFALAILLSSTFVYNSMGTINQAMDQLHYVTELDRIAKSSPDA     | 160 |
| Vespertilionidae    | M. lucifugus      | 81  | WCVPHPKPDHTLVLLDTEG.GDVEKGDNQNDSWIFALAILLSSTFVYNSMGTINQAMDQLHYVTELDRIAKSSPDA     | 160 |
|                     | M. myotis         | 81  | WCVPHPKPDHTLVLLDTEG.GDVEKGDNQNDSWIFALAILLSSTFVYNSMGTINQAMDQLHYVTELDRIAKSSPDA     | 160 |
|                     | M. daubentonii    | 81  | WCVPHPKPDHTLVLLDTEG.GDVEKGDNQNDSWIFALAILLSSTFVYNSMGTINQAMDQLHYVTELDRIAKSSPDA     | 160 |
|                     | P. kuhlii         | 81  | WCVPHPKPDHTLVLLDTEG.GDVEKGDNQNDSWIFALAILLSSTFVYNSMGTINQAMDQLHYVTELDRIAKSSPDA     | 160 |
| Hominidae (outlier) | H. sapiens        | 81  | WCVPHPKPDHTLVLLDTEG.GDVEKGDNQNDSWIFALAILLSSTFVYNSMGTINQAMDQLHYVTELDRIAKSSPDA     | 160 |
| Pteropodidae        | P. alecto         | 161 | NE--DEDSADFSFFDFVWTLRDFSLLEADGGPISADEYLENSLKKKGTSPKDKNFNLPRLCIRKFFPKKCFIDFR      | 238 |
|                     | P. giganteus      | 161 | NE--DEDSADFSFFDFVWTLRDFSLLEADGGPISADEYLENSLKKKGTSPKDKNFNLPRLCIRKFFPKKCFIDFR      | 238 |
|                     | P. vampyrus       | 161 | NE--DEDSADFSFFDFVWTLRDFSLLEADGGPISADEYLENSLKKKGTSPKDKNFNLPRLCIRKFFPKKCFIDFR      | 238 |
|                     | P. mesoamericanus | 161 | NE--VEDSTNHSFFDFVWTLRDFSLEADGGPISADEYLENSLKKKGTSPKDKNFNLPRLCIRKFFPKKCFIDFR       | 238 |
|                     | S. hondurensis    | 161 | NE--VEDSTNHSFFDFVWTLRDFSLEADGGPISADEYLENSLKKKGTSPKDKNFNLPRLCIRKFFPKKCFIDFR       | 238 |
|                     | A. jamaicensis    | 161 | NE--VEDSTNHSFFDFVWTLRDFSLEADGGPISADEYLENSLKKKGTSPKDKNFNLPRLCIRKFFPKKCFIDFR       | 238 |
|                     | P. discolor       | 161 | NE--VEDSTNHSFFDFVWTLRDFSLEADGGPISADEYLENSLKKKGTSPKDKNFNLPRLCIRKFFPKKCFIDFR       | 238 |
|                     | P. hastatus       | 161 | NE--VEDSTNHSFFDFVWTLRDFSLEADGGPISADEYLENSLKKKGTSPKDKNFNLPRLCIRKFFPKKCFIDFR       | 238 |
|                     | D. rotundus       | 161 | NE--VEDSTNHSFFDFVWTLRDFSLEADGGPISADEYLENSLKKKGTSPKDKNFNLPRLCIRKFFPKKCFIDFR       | 238 |
|                     | E. fuscus         | 161 | NE--VEDSTNHSFFDFVWTLRDFSLEADGGPISADEYLENSLKKKGTSPKDKNFNLPRLCIRKFFPKKCFIDFR       | 238 |
| Vespertilionidae    | M. lucifugus      | 161 | NE--VEDSTNHSFFDFVWTLRDFSLEADGGPISADEYLENSLKKKGTSPKDKNFNLPRLCIRKFFPKKCFIDFR       | 238 |
|                     | M. myotis         | 161 | NE--VEDSTNHSFFDFVWTLRDFSLEADGGPISADEYLENSLKKKGTSPKDKNFNLPRLCIRKFFPKKCFIDFR       | 238 |
|                     | M. daubentonii    | 161 | NE--VEDSTNHSFFDFVWTLRDFSLEADGGPISADEYLENSLKKKGTSPKDKNFNLPRLCIRKFFPKKCFIDFR       | 238 |
|                     | P. kuhlii         | 161 | NE--VEDSTNHSFFDFVWTLRDFSLEADGGPISADEYLENSLKKKGTSPKDKNFNLPRLCIRKFFPKKCFIDFR       | 238 |
| Hominidae (outlier) | H. sapiens        | 161 | NE--VEDSTNHSFFDFVWTLRDFSLEADGGPISADEYLENSLKKKGTSPKDKNFNLPRLCIRKFFPKKCFIDFR       | 240 |
| Pteropodidae        | P. alecto         | 239 | PTHKKLGOLETLNDELDFEFVQQAADFCSYIFHSKVKTLGGIQQVNGPRLSLVLTYYNAISSGDLPCMENAVLALA     | 318 |
|                     | P. giganteus      | 239 | PTHKKLGOLETLNDELDFEFVQQAADFCSYIFHSKVKTLGGIQQVNGPRLSLVLTYYNAISSGDLPCMENAVLALA     | 318 |
|                     | P. vampyrus       | 239 | PTHKKLGOLETLNDELDFEFVQQAADFCSYIFHSKVKTLGGIQQVNGPRLSLVLTYYNAISSGDLPCMENAVLALA     | 318 |
|                     | P. mesoamericanus | 239 | PTHKKLGOLETLNDELDFEFVQQAADFCSYIFHSKVKTLGGIQQVNGPRLSLVLTYYNAISSGDLPCMENAVLALA     | 318 |
|                     | S. hondurensis    | 239 | PTHKKLGOLETLNDELDFEFVQQAADFCSYIFHSKVKTLGGIQQVNGPRLSLVLTYYNAISSGDLPCMENAVLALA     | 318 |
|                     | A. jamaicensis    | 239 | PTHKKLGOLETLNDELDFEFVQQAADFCSYIFHSKVKTLGGIQQVNGPRLSLVLTYYNAISSGDLPCMENAVLALA     | 318 |
|                     | P. discolor       | 239 | PTHKKLGOLETLNDELDFEFVQQAADFCSYIFHSKVKTLGGIQQVNGPRLSLVLTYYNAISSGDLPCMENAVLALA     | 318 |
|                     | P. hastatus       | 239 | PTHKKLGOLETLNDELDFEFVQQAADFCSYIFHSKVKTLGGIQQVNGPRLSLVLTYYNAISSGDLPCMENAVLALA     | 318 |
|                     | D. rotundus       | 239 | PTHKKLGOLETLNDELDFEFVQQAADFCSYIFHSKVKTLGGIQQVNGPRLSLVLTYYNAISSGDLPCMENAVLALA     | 318 |
|                     | E. fuscus         | 239 | PTHKKLGOLETLNDELDFEFVQQAADFCSYIFHSKVKTLGGIQQVNGPRLSLVLTYYNAISSGDLPCMENAVLALA     | 318 |
| Vespertilionidae    | M. lucifugus      | 239 | PTHKKLGOLETLNDELDFEFVQQAADFCSYIFHSKVKTLGGIQQVNGPRLSLVLTYYNAISSGDLPCMENAVLALA     | 318 |
|                     | M. myotis         | 239 | PTHKKLGOLETLNDELDFEFVQQAADFCSYIFHSKVKTLGGIQQVNGPRLSLVLTYYNAISSGDLPCMENAVLALA     | 318 |
|                     | M. daubentonii    | 239 | PTHKKLGOLETLNDELDFEFVQQAADFCSYIFHSKVKTLGGIQQVNGPRLSLVLTYYNAISSGDLPCMENAVLALA     | 318 |
|                     | P. kuhlii         | 239 | PTHKKLGOLETLNDELDFEFVQQAADFCSYIFHSKVKTLGGIQQVNGPRLSLVLTYYNAISSGDLPCMENAVLALA     | 318 |
| Hominidae (outlier) | H. sapiens        | 241 | PTHKKLGOLETLNDELDFEFVQQAADFCSYIFHSKVKTLGGIQQVNGPRLSLVLTYYNAISSGDLPCMENAVLALA     | 320 |
| Pteropodidae        | P. alecto         | 319 | QIENSAAYKKAIAHYDQOMAEKVLPTETLQELLDLHASEKEAIEVFINKSFKDVHILFQKELAAQLEKKRDDFKQNM    | 398 |
|                     | P. giganteus      | 319 | QIENSAAYKKAIAHYDQOMAEKVLPTETLQELLDLHASEKEAIEVFINKSFKDVHILFQKELAAQLEKKRDDFKQNM    | 398 |
|                     | P. vampyrus       | 319 | QIENSAAYKKAIAHYDQOMAEKVLPTETLQELLDLHASEKEAIEVFINKSFKDVHILFQKELAAQLEKKRDDFKQNM    | 398 |
|                     | P. mesoamericanus | 319 | QIENSAAYKKAIAHYDQOMAEKVLPTETLQELLDLHASEKEAIEVFINKSFKDVHILFQKELAAQLEKKRDDFKQNM    | 398 |
|                     | S. hondurensis    | 319 | QIENSAAYKKAIAHYDQOMAEKVLPTETLQELLDLHASEKEAIEVFINKSFKDVHILFQKELAAQLEKKRDDFKQNM    | 398 |
|                     | A. jamaicensis    | 319 | QIENSAAYKKAIAHYDQOMAEKVLPTETLQELLDLHASEKEAIEVFINKSFKDVHILFQKELAAQLEKKRDDFKQNM    | 398 |
|                     | P. discolor       | 319 | QIENSAAYKKAIAHYDQOMAEKVLPTETLQELLDLHASEKEAIEVFINKSFKDVHILFQKELAAQLEKKRDDFKQNM    | 398 |
|                     | P. hastatus       | 319 | QIENSAAYKKAIAHYDQOMAEKVLPTETLQELLDLHASEKEAIEVFINKSFKDVHILFQKELAAQLEKKRDDFKQNM    | 398 |
|                     | D. rotundus       | 319 | QIENSAAYKKAIAHYDQOMAEKVLPTETLQELLDLHASEKEAIEVFINKSFKDVHILFQKELAAQLEKKRDDFKQNM    | 398 |
|                     | E. fuscus         | 319 | QIENSAAYKKAIAHYDQOMAEKVLPTETLQELLDLHASEKEAIEVFINKSFKDVHILFQKELAAQLEKKRDDFKQNM    | 398 |
| Vespertilionidae    | M. lucifugus      | 319 | QIENSAAYKKAIAHYDQOMAEKVLPTETLQELLDLHASEKEAIEVFINKSFKDVHILFQKELAAQLEKKRDDFKQNM    | 398 |
|                     | M. myotis         | 319 | QIENSAAYKKAIAHYDQOMAEKVLPTETLQELLDLHASEKEAIEVFINKSFKDVHILFQKELAAQLEKKRDDFKQNM    | 398 |
|                     | M. daubentonii    | 319 | QIENSAAYKKAIAHYDQOMAEKVLPTETLQELLDLHASEKEAIEVFINKSFKDVHILFQKELAAQLEKKRDDFKQNM    | 398 |
|                     | P. kuhlii         | 319 | QIENSAAYKKAIAHYDQOMAEKVLPTETLQELLDLHASEKEAIEVFINKSFKDVHILFQKELAAQLEKKRDDFKQNM    | 398 |
| Hominidae (outlier) | H. sapiens        | 321 | QIENSAAYKKAIAHYDQOMAEKVLPTETLQELLDLHASEKEAIEVFINKSFKDVHILFQKELAAQLEKKRDDFKQNM    | 400 |
| Pteropodidae        | P. alecto         | 399 | KASSDRCSALLKDIHFPLEEDIKQGIYSKPGGYLFIQKMLKKKYLOEPRKGIOSEELQTYLIESKESVDAILOTQD     | 478 |
|                     | P. giganteus      | 399 | KASSDRCSALLKDIHFPLEEDIKQGIYSKPGGYLFIQKMLKKKYLOEPRKGIOSEELQTYLIESKESVDAILOTQD     | 478 |
|                     | P. vampyrus       | 399 | KASSDRCSALLKDIHFPLEEDIKQGIYSKPGGYLFIQKMLKKKYLOEPRKGIOSEELQTYLIESKESVDAILOTQD     | 478 |
|                     | P. mesoamericanus | 399 | KASSDRCSALLKDIHFPLEEDIKQGIYSKPGGYLFIQKMLKKKYLOEPRKGIOSEELQTYLIESKESVDAILOTQD     | 478 |
|                     | S. hondurensis    | 399 | KASSDRCSALLKDIHFPLEEDIKQGIYSKPGGYLFIQKMLKKKYLOEPRKGIOSEELQTYLIESKESVDAILOTQD     | 478 |
|                     | A. jamaicensis    | 399 | KASSDRCSALLKDIHFPLEEDIKQGIYSKPGGYLFIQKMLKKKYLOEPRKGIOSEELQTYLIESKESVDAILOTQD     | 478 |
|                     | P. discolor       | 399 | KASSDRCSALLKDIHFPLEEDIKQGIYSKPGGYLFIQKMLKKKYLOEPRKGIOSEELQTYLIESKESVDAILOTQD     | 478 |
|                     | P. hastatus       | 399 | KASSDRCSALLKDIHFPLEEDIKQGIYSKPGGYLFIQKMLKKKYLOEPRKGIOSEELQTYLIESKESVDAILOTQD     | 478 |
|                     | D. rotundus       | 399 | KASSDRCSALLKDIHFPLEEDIKQGIYSKPGGYLFIQKMLKKKYLOEPRKGIOSEELQTYLIESKESVDAILOTQD     | 478 |
|                     | E. fuscus         | 399 | KASSDRCSALLKDIHFPLEEDIKQGIYSKPGGYLFIQKMLKKKYLOEPRKGIOSEELQTYLIESKESVDAILOTQD     | 478 |
| Vespertilionidae    | M. lucifugus      | 399 | KASSDRCSALLKDIHFPLEEDIKQGIYSKPGGYLFIQKMLKKKYLOEPRKGIOSEELQTYLIESKESVDAILOTQD     | 478 |
|                     | M. myotis         | 399 | KASSDRCSALLKDIHFPLEEDIKQGIYSKPGGYLFIQKMLKKKYLOEPRKGIOSEELQTYLIESKESVDAILOTQD     | 478 |
|                     | M. daubentonii    | 399 | KASSDRCSALLKDIHFPLEEDIKQGIYSKPGGYLFIQKMLKKKYLOEPRKGIOSEELQTYLIESKESVDAILOTQD     | 478 |
|                     | P. kuhlii         | 399 | KASSDRCSALLKDIHFPLEEDIKQGIYSKPGGYLFIQKMLKKKYLOEPRKGIOSEELQTYLIESKESVDAILOTQD     | 478 |
| Hominidae (outlier) | H. sapiens        | 401 | KASSDRCSALLKDIHFPLEEDIKQGIYSKPGGYLFIQKMLKKKYLOEPRKGIOSEELQTYLIESKESVDAILOTQD     | 480 |
| Pteropodidae        | P. alecto         | 479 | SLTEKEKEIEVQRVKAESAEEAAKMLEEMQIKNOQMMQEKEKSHEHVHVKLTETKMAERAQLMAEQERTVALKLQEQSRL | 558 |
|                     | P. giganteus      | 479 | SLTEKEKEIEVQRVKAESAEEAAKMLEEMQIKNOQMMQEKEKSHEHVHVKLTETKMAERAQLMAEQERTVALKLQEQSRL | 558 |
|                     | P. vampyrus       | 479 | SLTEKEKEIEVQRVKAESAEEAAKMLEEMQIKNOQMMQEKEKSHEHVHVKLTETKMAERAQLMAEQERTVALKLQEQSRL | 558 |
|                     | P. mesoamericanus | 479 | SLTEKEKEIEVQRVKAESAEEAAKMLEEMQIKNOQMMQEKEKSHEHVHVKLTETKMAERAQLMAEQERTVALKLQEQSRL | 558 |
|                     | S. hondurensis    | 479 | SLTEKEKEIEVQRVKAESAEEAAKMLEEMQIKNOQMMQEKEKSHEHVHVKLTETKMAERAQLMAEQERTVALKLQEQSRL | 558 |
|                     | A. jamaicensis    | 479 | SLTEKEKEIEVQRVKAESAEEAAKMLEEMQIKNOQMMQEKEKSHEHVHVKLTETKMAERAQLMAEQERTVALKLQEQSRL | 558 |
|                     | P. discolor       | 479 | SLTEKEKEIEVQRVKAESAEEAAKMLEEMQIKNOQMMQEKEKSHEHVHVKLTETKMAERAQLMAEQERTVALKLQEQSRL | 558 |
|                     | P. hastatus       | 479 | SLTEKEKEIEVQRVKAESAEEAAKMLEEMQIKNOQMMQEKEKSHEHVHVKLTETKMAERAQLMAEQERTVALKLQEQSRL | 558 |
|                     | D. rotundus       | 479 | SLTEKEKEIEVQRVKAESAEEAAKMLEEMQIKNOQMMQEKEKSHEHVHVKLTETKMAERAQLMAEQERTVALKLQEQSRL | 558 |
|                     | E. fuscus         | 479 | SLTEKEKEIEVQRVKAESAEEAAKMLEEMQIKNOQMMQEKEKSHEHVHVKLTETKMAERAQLMAEQERTVALKLQEQSRL | 558 |
| Vespertilionidae    | M. lucifugus      | 479 | SLTEKEKEIEVQRVKAESAEEAAKMLEEMQIKNOQMMQEKEKSHEHVHVKLTETKMAERAQLMAEQERTVALKLQEQSRL | 558 |
|                     | M. myotis         | 479 | SLTEKEKEIEVQRVKAESAEEAAKMLEEMQIKNOQMMQEKEKSHEHVHVKLTETKMAERAQLMAEQERTVALKLQEQSRL | 558 |
|                     | M. daubentonii    | 479 | SLTEKEKEIEVQRVKAESAEEAAKMLEEMQIKNOQMMQEKEKSHEHVHVKLTETKMAERAQLMAEQERTVALKLQEQSRL | 558 |
|                     | P. kuhlii         | 479 | SLTEKEKEIEVQRVKAESAEEAAKMLEEMQIKNOQMMQEKEKSHEHVHVKLTETKMAERAQLMAEQERTVALKLQEQSRL | 558 |
| Hominidae (outlier) | H. sapiens        | 481 | SLTEKEKEIEVQRVKAESAEEAAKMLEEMQIKNOQMMQEKEKSHEHVHVKLTETKMAERAQLMAEQERTVALKLQEQSRL | 560 |
| Pteropodidae        | P. alecto         | 559 | LKEGFQNESRQIHNIEIKNSMERP--RSTLTLS                                                | 591 |
|                     | P. giganteus      | 559 | LKEGFQNESRQIHNIEIKNSMERP--RSTLTLS                                                | 591 |
|                     | P. vampyrus       | 559 | LKEGFQNESRQIHNIEIKNSMERP--RSTLTLS                                                | 591 |
|                     | P. mesoamericanus | 559 | LKEGFQNESRQIHNIEIKNSMERP--RSTLTLS                                                | 591 |
|                     | S. hondurensis    | 559 | LKEGFQNESRQIHNIEIKNSMERP--RSTLTLS                                                | 591 |
|                     | A. jamaicensis    | 559 | LKEGFQNESRQIHNIEIKNSMERP--RSTLTLS                                                | 591 |
|                     | P. discolor       | 559 | LKEGFQNESRQIHNIEIKNSMERP--RSTLTLS                                                | 591 |
|                     | P. hastatus       | 559 | LKEGFQNESRQIHNIEIKNSMERP--RSTLTLS                                                | 591 |
|                     | D. rotundus       | 559 | LKEGFQNESRQIHNIEIKNSMERP--RSTLTLS                                                | 591 |
|                     | E. fuscus         | 559 | LKEGFQNESRQIHNIEIKNSMERP--RSTLTLS                                                | 591 |
| Vespertilionidae    | M. lucifugus      | 559 | LKEGFQNESRQIHNIEIKNSMERP--RSTLTLS                                                | 591 |
|                     | M. myotis         | 559 | LKEGFQNESRQIHNIEIKNSMERP--RSTLTLS                                                | 591 |
|                     | M. daubentonii    | 559 | LKEGFQNESRQIHNIEIKNSMERP--RSTLTLS                                                | 591 |
|                     | P. kuhlii         | 559 | LKEGFQNESRQIHNIEIKNSMERP--RSTLTLS                                                | 591 |
| Hominidae (outlier) | H. sapiens        | 561 | LKEGFQNESRQIHNIEIKNSMERP--RSTLTLS                                                | 592 |



**Supplementary Figure 15. Multiple protein sequence alignment for bat GBP1.** Grey boxes indicate identical residues. The four conserved motifs within the GTP-binding domain (G1-G4) and the carboxy-terminal isoprenylation (CaaX) motif are marked in purple and teal boxes, respectively. Newly identified motif that plays a role in the antiviral activity of EfGBP1 against EfPV (AV1) is marked in green. ClustalW alignment was generated using MacVector software. Human sequence was included as a comparator.

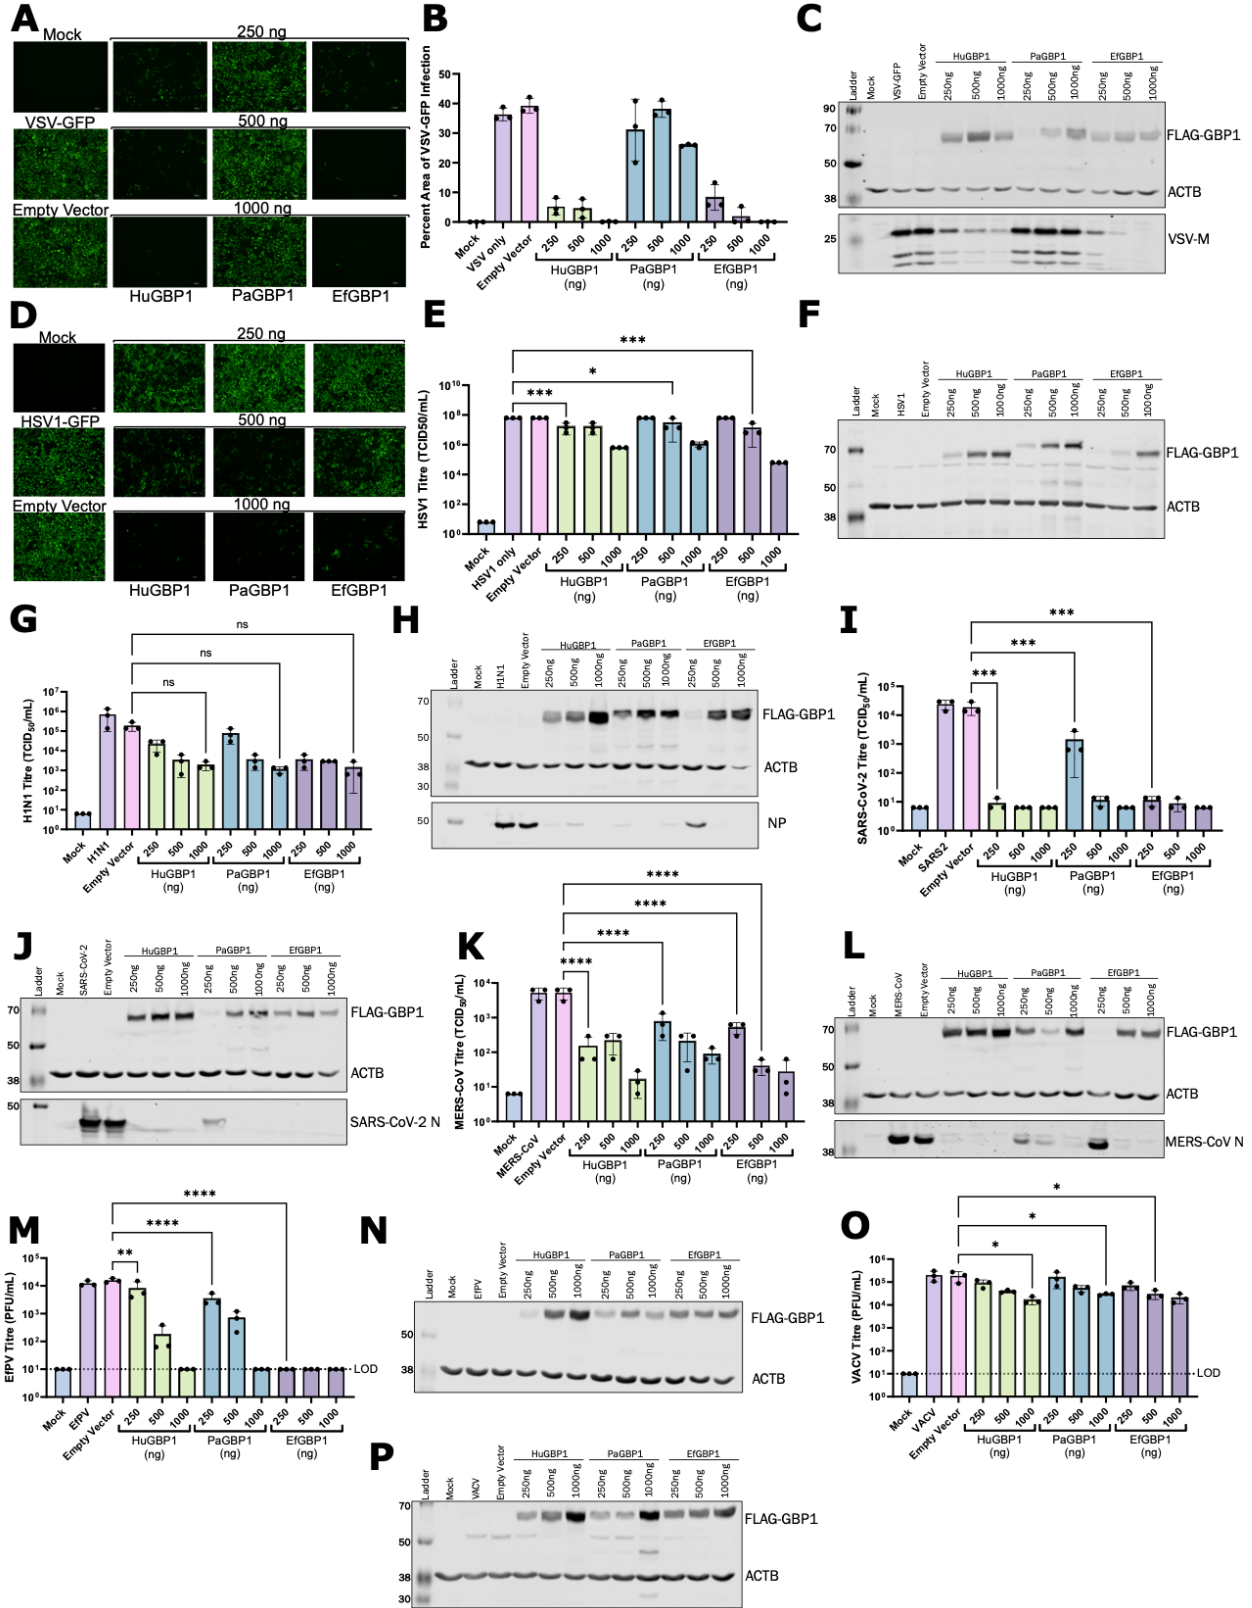

**Supplementary Figure 16. Antiviral activity of GBP1.** A549-ACE2 cells were transfected with 250 to 1000ng of HuGBP1, PaGBP1, or EfGBP1 for 24 hours, followed by infection with VSV-GFP (MOI 0.01) (**A-C**), HSV1- GFP (MOI 0.01) (**D-F**), H1N1-PR8 (MOI 0.01) (**G-H**), SARS-CoV-2 (MOI 0.01) (**I-J**), MERS-CoV (MOI 0.1) (**K-L**), VACV (MOI 0.01) (**M-N**), or EfPV (MOI 0.01) (**O-P**). Immunofluorescent microscopy was performed for VSV-GFP to quantify virus replication. Supernatant for all other viruses was titrated by TCID<sub>50</sub> or plaque assay (n=3; One-way ANOVA, Tukey's multiple comparisons test). Immunoblotting was performed to confirm FLAG-GBP1 expression.  $\beta$ -actin was used as loading control. VSV-GFP, H1N1, SARS-CoV-2, and MERS-CoV infection was further validated by probing for virus-specific proteins in immunoblots.

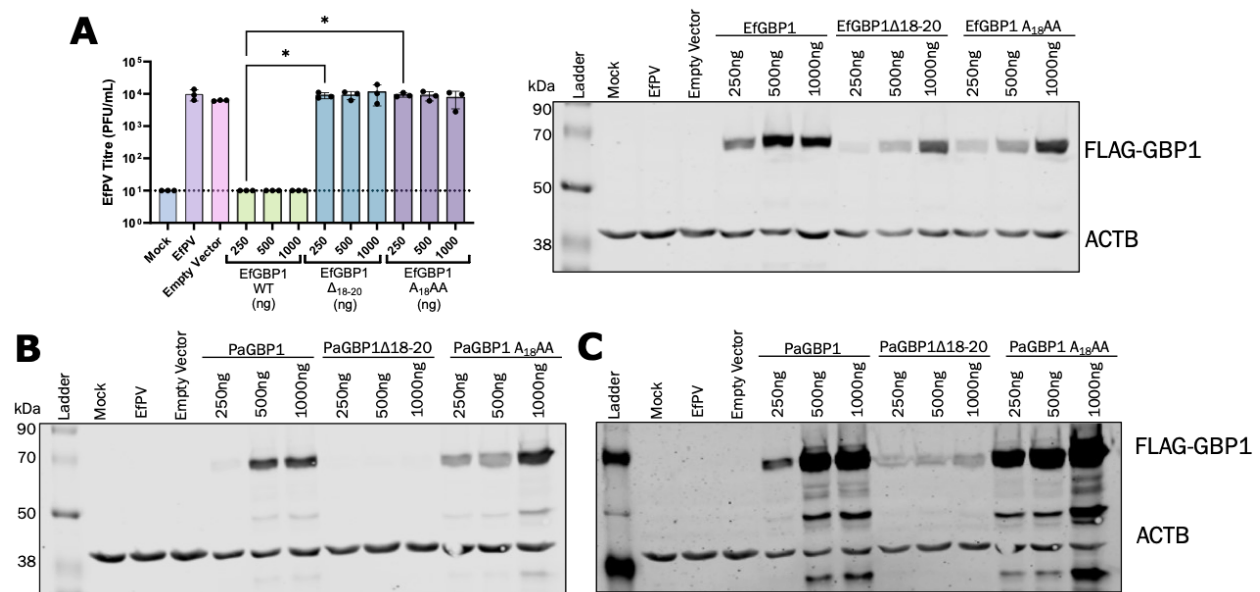

**Supplementary Figure 17. Mutagenesis of GBP1.** (A) A549-ACE2 cells were transfected with 250 to 1000ng of EfGBP1 wildtype (WT), deletion ( $\Delta_{18-20}$ ), or substitution (A<sub>18</sub>AA) variant for 24 hours, followed by infection with EfPV (MOI 0.01) for 48 hours. Supernatant was titrated by plaque assay (n=3; One-way ANOVA, Tukey's multiple comparisons test). Cell lysates were probed for FLAG-GBP1 and ACTB. All samples in Figures 4F, 4G and S17 were processed together and were derived from three independent biological replicates. (B) A549-ACE2 cells were transfected with 250 to 1000ng of WT,  $\Delta_{18-20}$ , or A<sub>18</sub>AA for PaGBP1 for 24 hours, followed by infection with EfPV (MOI 0.01) for 48 hours. Cell lysates were probed for FLAG-GBP1 and ACTB. (C) Overexposed image of (B) to demonstrate reduced expression of PaGBP1( $\Delta_{18-20}$ ).
